# Supplementary material
Source: MDPI journal article supplement (https://www.mdpi.com/2075-5309/10/10/173)
Supplement: s1 [file s1]

| Authors                                                           | Article Title                                                                                                                                      | Source Title                                          | Year | DOI                                | C1 | C2 | C3 |
|-------------------------------------------------------------------|----------------------------------------------------------------------------------------------------------------------------------------------------|-------------------------------------------------------|------|------------------------------------|----|----|----|
| A Kassem M., Khoiry M.A., Hamzah N.                               | Assessment of the effect of external risk factors on the success of an oil and gas construction project                                            | Engineering construction and architectural management | 2020 | 10.1108/ECAM-10-2019-0573          |    |    | X  |
| Aaltonen, K; Kujala, J                                            | Towards an improved understanding of project stakeholder landscapes                                                                                | International journal of project management           | 2016 | 10.1016/j.ijproman.2016.08.009     |    |    | X  |
| Abbasian-Hosseini S.A., Liu M., Howell G.                         | Investigating the Cost-Benefit Trade-Off of Additional Planning Using Parade Game Simulation                                                       | Journal of management in engineering                  | 2018 | 10.1061/(ASCE)ME.1943-5479.0000580 |    |    | X  |
| Abbasian-Hosseini S.A., Liu M., Leming M.                         | Comparison of least-cost and least-pollution equipment fleet configurations using computer simulation                                              | Journal of management in engineering                  | 2015 | 10.1061/(ASCE)ME.1943-5479.0000360 |    |    | X  |
| Abbasianjahromi H., Etemadi A.                                    | Applying social network analysis to identify the most effective persons according to their potential in causing accidents in construction projects | International journal of construction management      | 2019 | 10.1080/15623599.2019.1683688      |    |    | X  |
| Abbasianjahromi H., Rajaie H., Shakeri E., Kazemi O.              | A new approach for subcontractor selection in the construction industry based on portfolio theory                                                  | Journal of civil engineering and management           | 2016 | 10.3846/13923730.2014.897983       |    |    | X  |
| Abbaspour, M; Toutounchian, S; Dana, T; Abedi, Z; Toutounchian, S | Environmental Parametric Cost Model in Oil and Gas EPC Contracts                                                                                   | Sustainability                                        | 2018 | 10.3390/su10010195                 |    |    | X  |
| Abbsaian-Hosseini S.A., Liu M., Hsiang S.M.                       | Social network analysis for construction crews                                                                                                     | International journal of construction management      | 2019 | 10.1080/15623599.2017.1389642      |    |    | X  |
| Abd Jamil A.H., Fathi M.S.                                        | Contractual challenges for BIM-based construction projects: a systematic review                                                                    | Built environment project and asset management        | 2018 | 10.1108/BEPAM-12-2017-0131         |    |    | X  |

| Authors                                             | Article Title                                                                                                                                                               | Source Title                                          | Year | DOI                                | C1 | C2 | C3 |
|-----------------------------------------------------|-----------------------------------------------------------------------------------------------------------------------------------------------------------------------------|-------------------------------------------------------|------|------------------------------------|----|----|----|
| Abd Jamil A.H., Fathi M.S.                          | Enhancing BIM-Based Information Interoperability: Dispute Resolution from Legal and Contractual                                                                             | Journal of construction engineering and management    | 2020 | 10.1061/(ASCE)CO.1943-7862.0001868 | X  |    | X  |
| Abdel-Galil E., Ibrahim A.H., Alborkan A.           | Assessment of transaction costs for construction                                                                                                                            | International journal of construction management      | 2020 | 10.1080/15623599.2020.1738204      |    |    | X  |
| Abdi A., Taghipour S., Khamooshi H.                 | A model to control environmental performance of project execution process based on greenhouse gas emissions using earned value                                              | International journal of project management           | 2018 | 10.1016/j.ijproman.2017.12.003     |    |    | X  |
| Abdirad H., Dossick C.S.                            | Normative and descriptive models for COBie implementation: discrepancies and limitations                                                                                    | Engineering construction and architectural management | 2019 | 10.1108/ECAM-10-2018-0443          | X  |    | X  |
| Abdullah A.H., Yaman S.K., Mohammad H., Hassan P.F. | Construction manager's technical competencies in Malaysian construction                                                                                                     | Engineering construction and architectural management | 2018 | 10.1108/ECAM-07-2016-0176          |    |    | X  |
| Abotaleb I.S., El-Adaway I.H.                       | First Attempt Toward a Holistic Understanding of the Interdependent Rippled Impacts Associated with Out-of-Sequence Work in Construction Projects: System Dynamics Modeling | Journal of construction engineering and management    | 2018 | 10.1061/(ASCE)CO.1943-7862.0001539 |    |    | X  |
| Abotaleb I.S., El-Adaway I.H.                       | Managing Construction Projects through Dynamic Modeling: Reviewing the Existing Body of Knowledge and Deriving Future Research                                              | Journal of management in engineering                  | 2018 | 10.1061/(ASCE)ME.1943-5479.0000633 |    |    | X  |

| Authors                                                        | Article Title                                                                                                                   | Source Title                                          | Year | DOI                                | C1 | C2 | C3 |
|----------------------------------------------------------------|---------------------------------------------------------------------------------------------------------------------------------|-------------------------------------------------------|------|------------------------------------|----|----|----|
| Abotaleb I.S., El-Adaway I.H., Moussa M.B.                     | Guidelines for Administrating and Drafting Nonpayment Owners' Obligation Provisions under                                       | Journal of management in engineering                  | 2019 | 10.1061/(ASCE)ME.1943-5479.0000693 |    |    | X  |
| Abou Yassin A., Hamzeh F., Al Sakka F.                         | Agent based modeling to optimize workflow of robotic steel and concrete 3D printers                                             | Automation in construction                            | 2020 | 10.1016/j.autcon.2019.103040       |    | X  |    |
| Abu Awwad, K; Shibani, A; Ghostin, M                           | Exploring the critical success factors influencing BIM level 2 implementation in the UK construction industry: the case of SMEs | International journal of construction management      |      | 10.1080/15623599.2020.1744213      |    |    | X  |
| Abune'meh M., El Meouche R., Hijaze I., Mebarki A., Shahrou I. | Optimal construction site layout based on risk spatial variability                                                              | Automation in construction                            | 2016 | 10.1016/j.autcon.2016.06.014       |    |    | X  |
| Abusalem O.                                                    | Towards last planner system implementation in Gaza Strip, Palestine                                                             | International journal of construction management      | 2020 | 10.1080/15623599.2018.1484861      |    |    | X  |
| Acheamfour, VK; Kissi, E; Adjei-Kumi, T                        | Ascertaining the impact of contractors pre-qualification criteria on project success criteria                                   | Engineering construction and architectural management | 2019 | 10.1108/ECAM-03-2018-0110          |    |    | X  |
| Adabre M.A., Chan A.P.C.                                       | Towards a sustainability assessment model for affordable housing projects: the perspective of professionals in Ghana            | Engineering construction and architectural management | 2020 | 10.1108/ECAM-08-2019-0432          |    |    | X  |
| Adafin, J; Rotimi, JOB; Wilkinson, S                           | Determining Significant Risks in the Variability between Design-Stage Elemental Cost Plan and                                   | Journal of management in engineering                  | 2016 | 10.1061/(ASCE)ME.1943-5479.0000448 |    |    | X  |

| Authors                                          | Article Title                                                                                             | Source Title                                          | Year | DOI                                | C1 | C2 | C3 |
|--------------------------------------------------|-----------------------------------------------------------------------------------------------------------|-------------------------------------------------------|------|------------------------------------|----|----|----|
| Adafin, J; Rotimi, JOB; Wilkinson, S             | Risk impact assessments in project budget development: quantity surveyors'                                | International journal of construction management      | 2020 | 10.1080/15623599.2018.1462441      |    |    | X  |
| Adam A., Lindahl G.                              | Applying the dynamic capabilities framework in the case of a large public construction client             | Construction management and economics                 | 2017 | 10.1080/01446193.2017.1309441      |    |    | X  |
| Adam, A; Josephson, PEB; Lindahl, G              | Aggregation of factors causing cost overruns and time delays in large public construction projects Trends | Engineering construction and architectural management | 2017 | 10.1108/ECAM-09-2015-0135          |    |    | X  |
| Adami V.S., Verschoore J.R., Antunes J.A.V., Jr. | Effect of Relational Characteristics on Management of Wind Farm Interorganizational Construction Projects | Journal of construction engineering and management    | 2019 | 10.1061/(ASCE)CO.1943-7862.0001619 | X  |    | X  |
| Addis M.                                         | Tacit and explicit knowledge in construction management                                                   | Construction management and economics                 | 2016 | 10.1080/01446193.2016.1180416      |    |    | X  |
| Adesi M., Owusu-Manu D.-G., Murphy R.            | Strategic competences for pricing quantity surveying consultancy services                                 | Engineering construction and architectural management | 2018 | 10.1108/ECAM-12-2016-0264          |    |    | X  |
| Adu, ET; Opawole, A                              | Assessment of performance of teamwork in construction projects delivery in South-Southern Nigeria         | Journal of engineering design and technology          | 2020 | 10.1108/JEDT-01-2019-0025          | X  |    |    |
| Afshari A.R.                                     | Methods for Selection of Construction Project Manager: Case Study                                         | Journal of construction engineering and management    | 2017 | 10.1061/(ASCE)CO.1943-7862.0001400 |    |    | X  |
| Afzal F., Yunfei S., Sajid M., Afzal F.          | Integrated priority decision index for risk assessment in chaos: cost overruns in transport projects      | Engineering construction and architectural management | 2019 | 10.1108/ECAM-02-2019-0079          |    |    | X  |

| Authors                                                 | Article Title                                                                                                  | Source Title                                          | Year | DOI                                | C1 | C2 | C3 |
|---------------------------------------------------------|----------------------------------------------------------------------------------------------------------------|-------------------------------------------------------|------|------------------------------------|----|----|----|
| Aghimien D.O., Oke A.E., Aigbavboa C.O.                 | Barriers to the adoption of value management in developing countries                                           | Engineering construction and architectural management | 2018 | 10.1108/ECAM-04-2017-0070          |    |    | X  |
| Aghimien, D; Aigbavboa, C; Oke, A; Thwala, W; Moripe, P | Digitalization of construction organisations - a case for digital partnering                                   | International journal of construction management      |      | 10.1080/15623599.2020.1745134      |    | X  |    |
| Aghimien, DO; Aigbavboa, CO; Oke, AE                    | Critical success factors for digital partnering of construction organisations -                                | Engineering construction and architectural management |      | 10.1108/ECAM-11-2019-0602          |    | X  | X  |
| Aghimien, DO; Aigbavboa, CO; Oke, AE; Thwala, WD        | Mapping out research focus for robotics and automation research in construction-related studies A bibliometric | Journal of engineering design and technology          |      | 10.1108/JEDT-09-2019-0237          |    | X  |    |
| Agustí-Juan I., Habert G.                               | Environmental design guidelines for digital                                                                    | Journal of cleaner production                         | 2017 | 10.1016/j.jclepro.2016.10.190      |    | X  |    |
| Agyekum - Mensah G.                                     | The degree of accuracy and factors that influence the uncertainty of SME cost estimates                        | International journal of construction management      | 2019 | 10.1080/15623599.2018.1452094      |    |    | X  |
| Agyekum-Mensah G., Knight A.D.                          | The professionals' perspective on the causes of project delay in the                                           | Engineering construction and architectural management | 2017 | 10.1108/ECAM-03-2016-0085          |    |    | X  |
| Agyekum-Mensah G., Reid A., Temitope T.A.               | Methodological Pluralism: Investigation into Construction Engineering and Management Research                  | Journal of construction engineering and management    | 2020 | 10.1061/(ASCE)CO.1943-7862.0001786 |    |    | X  |
| Ahmad I., Azhar N., Chowdhury A.                        | Enhancement of IPD Characteristics as Impelled by Information and Communication Technology                     | Journal of management in engineering                  | 2019 | 10.1061/(ASCE)ME.1943-5479.0000670 | X  |    | X  |

| Authors                                                                     | Article Title                                                                                                    | Source Title                                          | Year | DOI                                | C1 | C2 | C3 |
|-----------------------------------------------------------------------------|------------------------------------------------------------------------------------------------------------------|-------------------------------------------------------|------|------------------------------------|----|----|----|
| Ahmad Z., Thaheem M.J., Maqsoom A.                                          | Building information modeling as a risk transformer: An evolutionary insight into the project                    | Automation in construction                            | 2018 | 10.1016/j.autcon.2018.03.032       |    |    | X  |
| Ahmad, T; Aibinu, AA; Stephan, A; Chan, APC                                 | Investigating associations among performance criteria in Green Building projects                                 | Journal of cleaner production                         | 2019 | 10.1016/j.jclepro.2019.06.013      |    |    | X  |
| Ahmadi M., Behzadian K., Ardeshir A., Kapelan Z.                            | Comprehensive risk management using fuzzy FMEA and MCDA techniques in highway                                    | Journal of civil engineering and management           | 2017 | 10.3846/13923730.2015.1068847      |    |    | X  |
| Ahmadian F.F.A., Akbarnezhad A., Rashidi T.H., Waller S.T.                  | Accounting for transport times in planning off-site shipment of construction                                     | Journal of construction engineering and management    | 2016 | 10.1061/(ASCE)CO.1943-7862.0001030 |    | X  |    |
| Ahmadian Fard Fini A., Akbarnezhad A., Rashidi T.H., Waller S.T.            | Enhancing the safety of construction crew by accounting for brain resource requirements of activities in         | Automation in construction                            | 2018 | 10.1016/j.autcon.2017.12.013       |    |    | X  |
| Ahmadian, FFA; Rashidi, TH; Akbarnezhad, A; Waller, ST                      | BIM-enabled sustainability assessment of material supply decisions                                               | Engineering construction and architectural management | 2017 | 10.1108/ECAM-12-2015-0193          |    |    | X  |
| Ahmed M.O., El-Adaway I.H., Coatney K.T., Eid M.S.                          | Construction bidding and the winner's curse: Game theory approach                                                | Journal of construction engineering and management    | 2016 | 10.1061/(ASCE)CO.1943-7862.0001058 |    |    | X  |
| Ahn J., Ji S.-H., Ahn S.J., Park M., Lee H.-S., Kwon N., Lee E.-B., Kim Y.  | Performance evaluation of normalization-based CBR models for improving construction cost estimation              | Automation in construction                            | 2020 | 10.1016/j.autcon.2020.103329       |    |    | X  |
| Ahn S., A.m.asce, Crouch L., Wan Kim T., 0000-0002-7887-1055, Rameezdeen R. | Comparison of Worker Safety Risks between Onsite and Offsite Construction Methods: A Site Management Perspective | Journal of construction engineering and management    | 2020 | 10.1061/(ASCE)CO.1943-7862.0001890 |    |    | X  |

| Authors                                           | Article Title                                                                                                                                           | Source Title                                          | Year | DOI                                | C1 | C2 | C3 |
|---------------------------------------------------|---------------------------------------------------------------------------------------------------------------------------------------------------------|-------------------------------------------------------|------|------------------------------------|----|----|----|
| Ahn S., Lee S.                                    | Methodology for creating empirically supported agent-based simulation with survey data for studying group behavior of construction                      | Journal of construction engineering and management    | 2015 | 10.1061/(ASCE)CO.1943-7862.0000918 |    |    | X  |
| Ahn S., Shokri S., Lee S., Haas C.T., Haas R.C.G. | Exploratory Study on the Effectiveness of Interface-Management Practices in Dealing with Project Complexity in Large-Scale Engineering and Construction | Journal of management in engineering                  | 2017 | 10.1061/(ASCE)ME.1943-5479.0000488 |    |    | X  |
| Ahn, C; Schmidt, S                                | Designing Wetlands as an Essential Infrastructural Element for Urban Development in the era of Climate Change                                           | Sustainability                                        | 2019 | 10.3390/su11071920                 |    |    | X  |
| Ahn, S; Kim, T; Kim, JM                           | Sustainable Risk Assessment through the Analysis of Financial Losses from Third-Party Damage in Bridge Construction                                     | Sustainability                                        | 2020 | 10.3390/su12083435                 |    |    | X  |
| Ahola T.                                          | So alike yet so different: A typology of interorganisational projects                                                                                   | International journal of project management           | 2018 | 10.1016/j.ijproman.2018.07.005     |    |    | X  |
| Ahsan, K; Paul, SK                                | Procurement Issues in Donor-Funded International Development Projects                                                                                   | Journal of management in engineering                  | 2018 | 10.1061/(ASCE)ME.1943-5479.0000648 |    |    | X  |
| Ahuja R., Sawhney A., Arif M.                     | Developing organizational capabilities to deliver lean and green project outcomes using BIM                                                             | Engineering construction and architectural management | 2018 | 10.1108/ECAM-08-2017-0175          |    |    | X  |
| Ahuja S., Nikolova N., Clegg S.                   | Professional identity and anxiety in architect-client                                                                                                   | Construction management and economics                 | 2020 | 10.1080/01446193.2019.1703019      |    | X  | X  |

| Authors                                                                                 | Article Title                                                                                                            | Source Title                                          | Year | DOI                             | C1 | C2 | C3 |
|-----------------------------------------------------------------------------------------|--------------------------------------------------------------------------------------------------------------------------|-------------------------------------------------------|------|---------------------------------|----|----|----|
| Aibinu A.A., Papadonikolaki E.                                                          | Conceptualizing and operationalizing team task interdependences: BIM implementation assessment using effort distribution | Construction management and economics                 | 2020 | 10.1080/01446193.2019.1623409   |    |    | X  |
| Aibinu, AA; Carter, S; Francis, V; Vaz-Serra, P                                         | Request for information frequency and their turnaround time in construction projects A data-                             | Built environment project and asset management        | 2019 | 10.1108/BEPAM-10-2018-0130      | X  |    | X  |
| Ajayi S.O., Oyedele L.O.                                                                | Policy imperatives for diverting construction waste from landfill: Experts' recommendations for UK                       | Journal of cleaner production                         | 2017 | 10.1016/j.jclepro.2017.01.075   |    |    | X  |
| Ajayi S.O., Oyedele L.O., Bilal M., Akinade O.O., Alaka H.A., Owolabi H.A., Kadiri K.O. | Waste effectiveness of the construction industry: Understanding the impediments and requisites                           | Resources, conservation and recycling                 | 2015 | 10.1016/j.resconrec.2015.06.001 |    | X  |    |
| Ajayi, SO; Jones, W; Unuigbo, M                                                         | Occupational stress management for UK construction professionals Understanding the causes and strategies for improvement | Journal of engineering design and technology          | 2019 | 10.1108/JEDT-09-2018-0162       | X  |    |    |
| Ajayi, SO; Oyedele, LO; Kadiri, KO; Akinade, OO; Bilal, M; Owolabi, HA; Alaka, HA       | Competency-based measures for designing out construction waste: task and contextual attributes                           | Engineering construction and architectural management | 2016 | 10.1108/ECAM-06-2015-0095       |    |    | X  |
| Aje O.I., Olatunji O.A., Olalusi O.A.                                                   | Overrun causations under advance payment regimes                                                                         | Built environment project and asset management        | 2017 | 10.1108/BEPAM-06-2015-0028      |    |    | X  |
| Akan, MOA; Dhavale, DG; Sarkis, J                                                       | Greenhouse gas emissions in the construction industry: An analysis and evaluation of a concrete supply chain             | Journal of cleaner production                         | 2017 | 10.1016/j.jclepro.2017.07.225   |    |    | X  |



| Authors                                                                            | Article Title                                                                                                                                        | Source Title                                          | Year | DOI                                | C1 | C2 | C3 |
|------------------------------------------------------------------------------------|------------------------------------------------------------------------------------------------------------------------------------------------------|-------------------------------------------------------|------|------------------------------------|----|----|----|
| Akanmu A., Anumba C.J.                                                             | Cyber-physical systems integration of building information models and the physical construction                                                      | Engineering construction and architectural management | 2015 | 10.1108/ECAM-07-2014-0097          | X  |    | X  |
| Akbari S., Khanzadi M., Gholamian M.R.                                             | Building a rough sets-based prediction model for classifying large-scale construction projects based on sustainable success index                    | Engineering construction and architectural management | 2018 | 10.1108/ECAM-05-2016-0110          |    |    | X  |
| Akgul B.K., Ozorhon B., Dikmen I., Birgonul M.T.                                   | Social network analysis of construction companies operating in international markets: case of Turkish contractors                                    | Journal of civil engineering and management           | 2017 | 10.3846/13923730.2015.1073617      |    |    | X  |
| Akhavian, R; Behzadan, AH                                                          | Smartphone-based construction workers' activity recognition and classification                                                                       | Automation in construction                            | 2016 | 10.1016/j.autcon.2016.08.015       |    |    | X  |
| Akinade, OO; Oyedele, LO; Ajayi, SO; Bilal, M; Alaka, HA; Owolabi, HA; Arawomo, OO | Designing out construction waste using BIM technology: Stakeholders' expectations for industry deployment                                            | Journal of cleaner production                         | 2018 | 10.1016/j.jclepro.2018.01.022      |    |    | X  |
| Akintola A., Venkatachalam S., Root D.                                             | New BIM Roles' Legitimacy and Changing Power Dynamics on BIM-Enabled                                                                                 | Journal of construction engineering and management    | 2017 | 10.1061/(ASCE)CO.1943-7862.0001366 |    |    | X  |
| Akintola, A; Venkatachalam, S; Root, D                                             | Understanding BIM's impact on professional work practices using activity                                                                             | Construction management and economics                 | 2020 | 10.1080/01446193.2018.1559338      |    |    | X  |
| Akotia, J; Sackey, E                                                               | Towards the delivery of sustainable regeneration projects' types in the UK: an exploration of the role and level of involvement of key practitioners | International journal of construction management      | 2018 | 10.1080/15623599.2017.1326300      |    |    | X  |

| Authors                                  | Article Title                                                                                         | Source Title                                          | Year | DOI                                | C1 | C2 | C3 |
|------------------------------------------|-------------------------------------------------------------------------------------------------------|-------------------------------------------------------|------|------------------------------------|----|----|----|
| Akroush, NS; El-adaway, IH               | Utilizing Construction Leading Safety Indicators: Case Study of Tennessee                             | Journal of management in engineering                  | 2017 | 10.1061/(ASCE)ME.1943-5479.0000546 |    |    | X  |
| Aktas, B; Ozorhon, B                     | Green Building Certification Process of Existing Buildings in Developing Countries: Cases from Turkey | Journal of management in engineering                  | 2015 | 10.1061/(ASCE)ME.1943-5479.0000358 |    |    | X  |
| Al Kuwaiti, E; Ajmal, MM; Hussain, M     | Determining success factors in Abu Dhabi health care construction projects: customer and contractor   | International journal of construction management      | 2018 | 10.1080/15623599.2017.1333401      |    |    | X  |
| Al-Abbadi G.M., Agyekum-Mensah G.        | The effects of motivational factors on construction professionals productivity in Jordan              | International journal of construction management      | 2019 | 10.1080/15623599.2019.1652951      |    |    | X  |
| Aladağ H., Işık Z.                       | Role of Financial Risks in BOT Megatransportation Projects in Developing                              | Journal of management in engineering                  | 2017 | 10.1061/(ASCE)ME.1943-5479.0000527 |    |    | X  |
| Aladağ H., Işık Z.                       | Design and construction risks in BOT type mega transportation projects                                | Engineering construction and architectural management | 2019 | 10.1108/ECAM-08-2018-0351          |    |    | X  |
| Alaghbari W., Al-Sakkaf A.A., Sultan B.  | Factors affecting construction labour productivity in Yemen                                           | International journal of construction management      | 2019 | 10.1080/15623599.2017.1382091      |    |    | X  |
| Alanjari P., Razavialavi S., AbouRizk S. | Hybrid Genetic Algorithm-Simulation Optimization Method for Proactively Planning Layout of Material   | Journal of construction engineering and management    | 2015 | 10.1061/(ASCE)CO.1943-7862.0001017 |    |    | X  |
| Alasad R., Motawa I.                     | Dynamic demand risk assessment for toll road                                                          | Construction management and economics                 | 2015 | 10.1080/01446193.2016.1143561      |    |    | X  |
| Alashwal A.M., Ann T.S.                  | Application of home-country joint venture (HJV) for international construction contractors            | International journal of construction management      | 2019 | 10.1080/15623599.2019.1613209      |    |    | X  |

| Authors                                             | Article Title                                                                                                                    | Source Title                                          | Year | DOI                                | C1 | C2 | C3 |
|-----------------------------------------------------|----------------------------------------------------------------------------------------------------------------------------------|-------------------------------------------------------|------|------------------------------------|----|----|----|
| Alashwal A.M., Chew M.Y.                            | Simulation techniques for cost management and performance in construction projects in Malaysia                                   | Built environment project and asset management        | 2017 | 10.1108/BEPAM-11-2016-0058         |    |    | X  |
| Alashwal, AM; Abdul-Rahman, H; Radzi, J             | Knowledge Utilization Process in Highway Construction Projects                                                                   | Journal of management in engineering                  | 2016 | 10.1061/(ASCE)ME.1943-5479.0000429 |    |    | X  |
| Alattiyih, W; Haider, H; Boussabaine, H             | Development of Value Creation Drivers for Sustainable Design of Green Buildings in Saudi Arabia                                  | Sustainability                                        | 2019 | 10.3390/su11205867                 |    |    | X  |
| Al-Aubaidy N.A., Caldas C.H., Mulva S.P.            | Assessment of underreporting factors on construction safety incidents in US construction projects                                | International journal of construction management      | 2019 | 10.1080/15623599.2019.1613211      |    |    | X  |
| Alavipour S.M.R., Arditi D.                         | Impact of contractor's optimized financing cost on project bid price                                                             | International journal of project management           | 2018 | 10.1016/j.ijproman.2018.03.001     |    |    | X  |
| Alavipour, SMR; Arditi, D                           | Maximizing expected contractor profit using an                                                                                   | Engineering construction and architectural management | 2019 | 10.1108/ECAM-04-2018-0149          |    | X  | X  |
| Al-Bayati A.J.                                      | Satisfying the Need for Diversity Training for Hispanic Construction Workers and Their Supervisors at US                         | Journal of construction engineering and management    | 2019 | 10.1061/(ASCE)CO.1943-7862.0001663 |    |    | X  |
| Albert A., Hallowell M.R., Lingard H., Kleiner B.M. | Multiple baseline testing: Experimental method for drawing causal inferences in construction engineering and management research | Journal of construction engineering and management    | 2015 | 10.1061/(ASCE)CO.1943-7862.0000983 |    |    | X  |

| Authors                                                                     | Article Title                                                                                                                             | Source Title                                          | Year | DOI                                | C1 | C2 | C3 |
|-----------------------------------------------------------------------------|-------------------------------------------------------------------------------------------------------------------------------------------|-------------------------------------------------------|------|------------------------------------|----|----|----|
| Albogamy A., Dawood N.                                                      | Development of a client-based risk management methodology for the early design stage of construction                                      | Engineering construction and architectural management | 2015 | 10.1108/ECAM-07-2014-0096          |    |    | X  |
| Alchaer E., Issa C.A.                                                       | Engineering Productivity Measurement: A Novel Approach                                                                                    | Journal of construction engineering and management    | 2020 | 10.1061/(ASCE)CO.1943-7862.0001875 |    |    | X  |
| Aldhaheeri M., Bakchan A., Sandhu M.A.                                      | A structural equation model for enhancing effectiveness of engineering, procurement and construction (EPC) major projects: End-user's     | Engineering construction and architectural management | 2018 | 10.1108/ECAM-07-2017-0130          |    |    | X  |
| Alencar M.H., Priori Jr. L., Alencar L.H.                                   | Structuring objectives based on value-focused thinking methodology: Creating alternatives for sustainability in the built environment     | Journal of cleaner production                         | 2017 | 10.1016/j.jclepro.2017.03.221      |    | X  | X  |
| Al-Fadhali N., Zainal R., Kasim N., Dodo M., Kim Soon N., Hasaballah A.H.A. | The desirability of Integrated Influential Factors (IIFs) Model of internal stakeholder as a panacea to project completion delay in Yemen | International journal of construction management      | 2019 | 10.1080/15623599.2017.1390720      |    |    | X  |
| Alhumaidi H.M.                                                              | Construction contractors ranking method using multiple decision-makers and multiattribute fuzzy weighted average                          | Journal of construction engineering and management    | 2015 | 10.1061/(ASCE)CO.1943-7862.0000949 |    |    | X  |

| Authors                                                         | Article Title                                                                                                                                                          | Source Title                                          | Year | DOI                                | C1 | C2 | C3 |
|-----------------------------------------------------------------|------------------------------------------------------------------------------------------------------------------------------------------------------------------------|-------------------------------------------------------|------|------------------------------------|----|----|----|
| Ali A.K.                                                        | A case study in developing an interdisciplinary learning experiment between architecture, building construction, and construction engineering and management education | Engineering construction and architectural management | 2019 | 10.1108/ECAM-07-2018-0306          |    |    | X  |
| Ali, B; Zahoor, H; Nasir, AR; Maqsoom, A; Khan, RWA; Mazher, KM | BIM-based claims management system: A centralized information repository for extension of                                                                              | Automation in construction                            | 2020 | 10.1016/j.autcon.2019.102937       |    |    | X  |
| Aliakbarlou, S; Wilkinson, S; Costello, SB; Jang, H             | Achieving Postdisaster Reconstruction Success Based on Satisfactory Delivery of Client Values within Contractors' Services                                             | Journal of management in engineering                  | 2018 | 10.1061/(ASCE)ME.1943-5479.0000581 |    |    | X  |
| Alizadehsalehi S., Hadavi A., Huang J.C.                        | From BIM to extended reality in AEC industry                                                                                                                           | Automation in construction                            | 2020 | 10.1016/j.autcon.2020.103254       |    |    | X  |
| Aljassmi, H; Han, S; Davis, S                                   | Analysis of the Complex Mechanisms of Defect Generation in Construction Projects                                                                                       | Journal of construction engineering and management    | 2016 | 10.1061/(ASCE)CO.1943-7862.0001042 |    |    | X  |
| Alleman D., Lee E.-B.                                           | Mitigating the legal challenges of imposing disincentives on nonperforming transportation                                                                              | Engineering construction and architectural management | 2020 | 10.1108/ECAM-04-2019-0188          | X  |    | X  |
| Allison L., Kaminsky J.                                         | Safety communication networks: Females in small work crews                                                                                                             | Journal of construction engineering and management    | 2017 | 10.1061/(ASCE)CO.1943-7862.0001344 | X  |    |    |

| Authors                                                 | Article Title                                                                                                                                    | Source Title                                             | Year | DOI                                | C1 | C2 | C3 |
|---------------------------------------------------------|--------------------------------------------------------------------------------------------------------------------------------------------------|----------------------------------------------------------|------|------------------------------------|----|----|----|
| Almaian R.Y., Needy K.L.,<br>Alves T.D.C.L., Walsh K.D. | Analyzing Effective Supplier-<br>Quality-Management<br>Practices Using Simple<br>Multiattribute Rating<br>Technique and Value-                   | Journal of management in<br>engineering                  | 2016 | 10.1061/(ASCE)ME.1943-5479.0000364 |    |    | X  |
| AlMaian R.Y., Needy K.L.,<br>Walsh K.D., Alves T.D.C.L. | A qualitative data analysis for<br>supplier quality-management<br>practices for engineer-<br>procure-construct projects                          | Journal of construction<br>engineering and management    | 2016 | 10.1061/(ASCE)CO.1943-7862.0001046 |    |    | X  |
| Almarri K., Aljarman M.,<br>Boussabaine H.              | Emerging contractual and<br>legal risks from the<br>application of building                                                                      | Engineering construction and<br>architectural management | 2019 | 10.1108/ECAM-06-2018-0224          |    |    | X  |
| Almarri K., Alzahrani S.,<br>Boussabaine H.             | An evaluation of the impact<br>of risk cost on risk allocation<br>in public private partnership<br>projects                                      | Engineering construction and<br>architectural management | 2019 | 10.1108/ECAM-04-2018-0177          |    |    | X  |
| Almatroushi, H; Hariga, M;<br>As'ad, R; Al-Bar, A       | The multi resource leveling<br>and materials procurement<br>problem: an integrated                                                               | Engineering construction and<br>architectural management |      | 10.1108/ECAM-10-2019-0563          |    |    | X  |
| Almeida N.M., Sousa V.,<br>Dias L.A., Branco F.         | Engineering risk management<br>in performance-based<br>building environments                                                                     | Journal of civil engineering<br>and management           | 2015 | 10.3846/13923730.2013.802740       |    |    | X  |
| Almusharraf A., Whyte A.                                | Task-based defect<br>management: anatomical<br>classification                                                                                    | Built environment project<br>and asset management        | 2016 | 10.1108/BEPAM-02-2015-0006         |    |    | X  |
| Aloini, D; Dulmin, R;<br>Mininno, V; Ponticelli, S      | Key antecedents and<br>practices for Supply Chain<br>Management adoption in                                                                      | International journal of<br>project management           | 2015 | 10.1016/j.ijproman.2015.03.013     |    |    | X  |
| Alotaibi A., Edum-Fotwe F.,<br>Price A.D.F.             | Critical barriers to social<br>responsibility implementation<br>within mega-construction<br>projects: The case of the<br>Kingdom of Saudi Arabia | Sustainability                                           | 2019 | 10.3390/su11061755                 | X  |    |    |

| Authors                                             | Article Title                                                                                                                                 | Source Title                                          | Year | DOI                                | C1 | C2 | C3 |
|-----------------------------------------------------|-----------------------------------------------------------------------------------------------------------------------------------------------|-------------------------------------------------------|------|------------------------------------|----|----|----|
| Alruqi W.M., Hallowell M.R.                         | Critical Success Factors for Construction Safety: Review and Meta-Analysis of Safety Leading Indicators                                       | Journal of construction engineering and management    | 2019 | 10.1061/(ASCE)CO.1943-7862.0001626 |    |    | X  |
| Al-Saeed Y., Edwards D.J., Scaysbrook S.            | Automating construction manufacturing procedures using BIM digital objects (BDOs): Case study of knowledge transfer partnership project in UK | Construction innovation                               | 2020 | 10.1108/CI-12-2019-0141            |    | X  |    |
| Alsafouri S., Ayer S.K.                             | Review of ICT Implementations for Facilitating Information Flow between Virtual Models and                                                    | Automation in construction                            | 2018 | 10.1016/j.autcon.2017.10.005       | X  | X  |    |
| Alshorafa, R; Ergen, E                              | Determining the level of development for BIM implementation in large-scale projects A multi-case study                                        | Engineering construction and architectural management |      | 10.1108/ECAM-08-2018-0352          | X  |    | X  |
| Alshubbak, A; Pellicer, E; Catala, J; Teixeira, JMC | A MODEL FOR IDENTIFYING OWNER'S NEEDS IN THE BUILDING LIFE CYCLE                                                                              | Journal of civil engineering and management           | 2015 | 10.3846/13923730.2015.1027257      |    |    | X  |
| Altuncan, IU; Tanyer, AM                            | Context-Dependent Construction Conflict Management Performance Analysis Based on Competency Theory                                            | Journal of construction engineering and management    | 2018 | 10.1061/(ASCE)CO.1943-7862.0001581 |    |    | X  |
| Altuwaim A., El-Rayes K.                            | Optimizing the Scheduling of Repetitive Construction to Minimize Interruption Cost                                                            | Journal of construction engineering and management    | 2018 | 10.1061/(ASCE)CO.1943-7862.0001510 |    |    | X  |

| Authors                                                       | Article Title                                                                                                                                  | Source Title                                          | Year | DOI                           | C1 | C2 | C3 |
|---------------------------------------------------------------|------------------------------------------------------------------------------------------------------------------------------------------------|-------------------------------------------------------|------|-------------------------------|----|----|----|
| Alwan, Z; Jones, P; Holgate, P                                | Strategic sustainable development in the UK construction industry, through the framework for strategic sustainable development, using Building | Journal of cleaner production                         | 2017 | 10.1016/j.jclepro.2015.12.085 |    |    | X  |
| Alvanchi A., Rahimi M., Alikhani H.                           | Air pollution concentration near sensitive urban locations: A missing factor to consider in the grade                                          | Journal of cleaner production                         | 2019 | 10.1016/j.jclepro.2019.04.300 |    |    | X  |
| Alvanchi A., Rahimi M., Mousavi M., Alikhani H.               | Construction schedule, an influential factor on air pollution in urban                                                                         | Journal of cleaner production                         | 2020 | 10.1016/j.jclepro.2020.120222 |    |    | X  |
| Alves T.D.C.L., Neuman Y., Walsh K.D., Needy K.L., AlMaian R. | Highly effective companies in supplier quality surveillance practices: a                                                                       | Construction management and economics                 | 2020 | 10.1080/01446193.2019.1590613 |    |    | X  |
| Alwisy A., Bouferguene A., Al-Hussein M.                      | Framework for target cost modelling in construction projects                                                                                   | International journal of construction management      | 2020 | 10.1080/15623599.2018.1462446 |    |    | X  |
| Alzraiee, H; Zayed, T; Moselhi, O                             | Dynamic planning of construction activities using hybrid simulation                                                                            | Automation in construction                            | 2015 | 10.1016/j.autcon.2014.08.011  |    |    | X  |
| Amadi A.I., Higham A.                                         | Putting context to numbers: a geotechnical risk trajectory to cost overrun extremism                                                           | Construction management and economics                 | 2019 | 10.1080/01446193.2018.1513656 |    |    | X  |
| Amadi C., Carrillo P., Tuuli M.                               | Stakeholder management in PPP projects: external stakeholders' perspective                                                                     | Built environment project and asset management        | 2018 | 10.1108/BEPAM-02-2018-0048    |    |    | X  |
| Amadi, C; Carrillo, P; Tuuli, M                               | PPP projects: improvements in stakeholder management                                                                                           | Engineering construction and architectural management | 2020 | 10.1108/ECAM-07-2018-0289     |    |    | X  |



| Authors                                           | Article Title                                                                                                | Source Title                                          | Year | DOI                                | C1 | C2 | C3 |
|---------------------------------------------------|--------------------------------------------------------------------------------------------------------------|-------------------------------------------------------|------|------------------------------------|----|----|----|
| Ameyaw, EE; Hu, Y; Shan, M; Chan, APC; Le, Y      | APPLICATION OF DELPHI METHOD IN CONSTRUCTION ENGINEERING AND MANAGEMENT RESEARCH: A QUANTITATIVE PERSPECTIVE | Journal of civil engineering and management           | 2016 | 10.3846/13923730.2014.945953       |    |    | X  |
| Ammar M.A.                                        | Optimization of line of balance scheduling considering work interruption                                     | International journal of construction management      | 2019 | 10.1080/15623599.2019.1624003      |    |    | X  |
| Ammar M.A., Abd-ElKhalek S.I.                     | Criticality measurement in fuzzy project scheduling                                                          | International journal of construction management      | 2019 | 10.1080/15623599.2019.1619226      |    |    | X  |
| Ammar M.A., Abdel-Maged A.F.                      | Modeling of LOB scheduling with learning development effect                                                  | International journal of construction management      | 2018 | 10.1080/15623599.2017.1357350      |    |    | X  |
| Ammar, MA                                         | Resource optimisation in line of balance scheduling                                                          | Construction management and economics                 |      | 10.1080/01446193.2019.1606924      |    |    | X  |
| Amuda-Yusuf G., Mohamed S.F.                      | Essential features of a building services standard method of measurement in                                  | Engineering construction and architectural management | 2015 | 10.1108/ECAM-06-2013-0060          |    |    | X  |
| An X., Li H., Zuo J., Ojuri O., Wang Z., Ding J.  | Identification and Prevention of Unbalanced Bids Using the Unascertained Model                               | Journal of construction engineering and management    | 2018 | 10.1061/(ASCE)CO.1943-7862.0001563 |    |    | X  |
| Andalib, R; Hoseini, A; Gatmiri, B                | A stochastic model of cash flow forecasting considering delays in owners' payments                           | Construction management and economics                 | 2018 | 10.1080/01446193.2018.1433309      |    |    | X  |
| Andary E.G., Abi Shdid C., Chowdhury A., Ahmad I. | Integrated project delivery implementation framework for water and wastewater treatment plant projects       | Engineering construction and architectural management | 2019 | 10.1108/ECAM-02-2019-0075          |    |    | X  |

| Authors                                                               | Article Title                                                                                                                          | Source Title                                                 | Year | DOI                                | C1 | C2 | C3 |
|-----------------------------------------------------------------------|----------------------------------------------------------------------------------------------------------------------------------------|--------------------------------------------------------------|------|------------------------------------|----|----|----|
| Anderson A., Dossick C.S., Osburn L.                                  | Curriculum to Prepare AEC Students for BIM-Enabled Globally Distributed Projects                                                       | International journal of construction education and research | 2019 | 10.1080/15578771.2019.1654569      | X  |    |    |
| Andrić J.M., Wang J., Mahamadu A.-M., Zhong R.                        | Understanding environmental incidents on construction sites in Australia: The causal factors, environmental impact and their relations | Journal of civil engineering and management                  | 2019 | 10.3846/jcem.2019.10435            |    |    | X  |
| Andric, JM; Wang, JY; Zhong, RY                                       | Identifying the Critical Risks in Railway Projects Based on Fuzzy and Sensitivity Analysis: A Case Study of Belt and Road Projects     | Sustainability                                               | 2019 | 10.3390/su11051302                 |    |    | X  |
| Annamalaisami C.D., Kuppuswamy A.                                     | Reckoning construction cost overruns in building projects through methodological consequences                                          | International journal of construction management             | 2019 | 10.1080/15623599.2019.1683689      |    |    | X  |
| Ansah R.H., Sorooshian S.                                             | 4P delays in project management                                                                                                        | Engineering construction and architectural management        | 2018 | 10.1108/ECAM-09-2016-0199          |    |    | X  |
| Ansari, R                                                             | Dynamic Simulation Model for Project Change-Management Policies: Engineering Project Case                                              | Journal of construction engineering and management           | 2019 | 10.1061/(ASCE)CO.1943-7862.0001664 |    |    | X  |
| Antunes R., González V.A., Walsh K., Rojas O., O'Sullivan M., Odeh I. | Benchmarking Project-Driven Production in Construction Using Productivity Function:                                                    | Journal of construction engineering and management           | 2018 | 10.1061/(ASCE)CO.1943-7862.0001438 |    |    | X  |
| Anvari B., Angeloudis P., Ochieng W.Y.                                | A multi-objective GA-based optimisation for holistic Manufacturing, transportation and Assembly of precast construction                | Automation in construction                                   | 2016 | 10.1016/j.autcon.2016.08.007       |    |    | X  |

| Authors                                                                          | Article Title                                                                                                                                                                     | Source Title                                       | Year | DOI                                | C1 | C2 | C3 |
|----------------------------------------------------------------------------------|-----------------------------------------------------------------------------------------------------------------------------------------------------------------------------------|----------------------------------------------------|------|------------------------------------|----|----|----|
| Anvuur A.M., Kumaraswamy M.M.                                                    | Effects of teamwork climate on cooperation in crossfunctional temporary multi-organization                                                                                        | Journal of construction engineering and management | 2016 | 10.1061/(ASCE)CO.1943-7862.0001029 |    |    | X  |
| Apa, R; Sedita, SR                                                               | How (do) internal capabilities and the geography of business networks shape the performance of contractors in public procurement tenders? Evidence from the construction industry | Construction management and economics              | 2017 | 10.1080/01446193.2017.1287926      |    | X  | X  |
| Aragao R.R., El-Diraby T.E.                                                      | Using network analytics to capture knowledge: Three cases in collaborative energy-oriented planning for oil and                                                                   | Journal of cleaner production                      | 2019 | 10.1016/j.jclepro.2018.10.346      |    |    | X  |
| Aragones-Beltran, P; Garcia-Melon, M; Montesinos-Valera, J                       | How to assess stakeholders' influence in project management? A proposal based on the Analytic Network Process                                                                     | International journal of project management        | 2017 | 10.1016/j.ijproman.2017.01.001     |    |    | X  |
| Arashpour M., Arashpour M.                                                       | Analysis of workflow variability and its impacts on productivity and performance in construction of multistory                                                                    | Journal of management in engineering               | 2015 | 10.1061/(ASCE)ME.1943-5479.0000363 |    |    | X  |
| Arashpour M., Bai Y., Aranda-mena G., Bab-Hadiashar A., Hosseini R., Kalutara P. | Optimizing decisions in advanced manufacturing of prefabricated products: Theorizing supply chain configurations in off-site construction                                         | Automation in construction                         | 2017 | 10.1016/j.autcon.2017.08.032       |    |    | X  |

| Authors                                                                                 | Article Title                                                                                                                                                          | Source Title                                          | Year | DOI                                | C1 | C2 | C3 |
|-----------------------------------------------------------------------------------------|------------------------------------------------------------------------------------------------------------------------------------------------------------------------|-------------------------------------------------------|------|------------------------------------|----|----|----|
| Arashpour M., Wakefield R.,<br>Abbasi B., Lee E.W.M.,<br>Minas J.                       | Off-site construction<br>optimization: Sequencing<br>multiple job classes with time<br>constraints                                                                     | Automation in construction                            | 2016 | 10.1016/j.autcon.2016.08.001       |    |    | X  |
| Arashpour M., Wakefield R.,<br>Blismas N., Abbasi B.                                    | Quantitative analysis of rate-<br>driven and due date-driven<br>construction: Production<br>efficiency, supervision, and<br>controllability in residential<br>projects | Journal of construction<br>engineering and management | 2016 | 10.1061/(ASCE)CO.1943-7862.0001032 |    |    | X  |
| Arashpour M., Wakefield R.,<br>Blismas N., Maqsood T.                                   | Autonomous production<br>tracking for augmenting<br>output in off-site construction                                                                                    | Automation in construction                            | 2015 | 10.1016/j.autcon.2015.03.013       |    |    | X  |
| Arashpour M., Wakefield R.,<br>Blismas N., Minas J.                                     | Optimization of process<br>integration and multi-skilled<br>resource utilization in off-site<br>construction                                                           | Automation in construction                            | 2015 | 10.1016/j.autcon.2014.12.002       |    |    | X  |
| Arashpour M., Wakefield R.,<br>Lee E.W.M., Chan R.,<br>Hosseini M.R.                    | Analysis of interacting<br>uncertainties in on-site and<br>off-site activities:<br>Implications for hybrid                                                             | International journal of<br>project management        | 2016 | 10.1016/j.ijproman.2016.02.004     |    |    | X  |
| Arashpour, M; Abbasi, B;<br>Arashpour, M; Hosseini, MR;<br>Yang, R                      | Integrated management of on-<br>site, coordination and off-site<br>uncertainty: Theorizing risk<br>analysis within a hybrid<br>project setting                         | International journal of<br>project management        | 2017 | 10.1016/j.ijproman.2017.02.016     |    |    | X  |
| Arashpour, M; Heidarpour,<br>A; Nezhad, AA;<br>Hosseini, Z; Chileshe, N;<br>Hosseini, R | Performance-based control of<br>variability and tolerance in<br>off-site manufacture and<br>assembly: optimization of<br>penalty on poor production                    | Construction management<br>and economics              | 2020 | 10.1080/01446193.2019.1616789      |    | X  | X  |

| Authors                                                               | Article Title                                                                                                                                        | Source Title                                             | Year | DOI                                | C1 | C2 | C3 |
|-----------------------------------------------------------------------|------------------------------------------------------------------------------------------------------------------------------------------------------|----------------------------------------------------------|------|------------------------------------|----|----|----|
| Arashpour, M; Kamat, V;<br>Bai, Y; Wakefield, R;<br>Abbasi, B         | Optimization modeling<br>modeling of multi-skilled<br>resources in prefabrication:<br>Theorizing cost analysis of<br>process integration in off-site | Automation in construction                               | 2018 | 10.1016/j.autcon.2018.07.027       |    |    | X  |
| Arditi D., Alavipour S.M.R.                                           | Trends in Expectations about<br>Duties and Responsibilities<br>of Construction Managers                                                              | Journal of construction<br>engineering and management    | 2019 | 10.1061/(ASCE)CO.1943-7862.0001661 |    |    | X  |
| Arditi D., Nayak S., Damci<br>A.                                      | Effect of organizational<br>culture on delay in                                                                                                      | International journal of<br>project management           | 2017 | 10.1016/j.ijproman.2016.10.018     |    |    | X  |
| Arefazar, Y; Nazari, A;<br>Hafezi, MR; Maghool, SAH                   | Prioritizing agile project<br>management strategies as a<br>change management tool in<br>construction projects                                       | International journal of<br>construction management      |      | 10.1080/15623599.2019.1644757      |    |    | X  |
| Arif M., Al Zubi M., Gupta<br>A.D., Egbu C., Walton R.O.,<br>Islam R. | Knowledge sharing maturity<br>model for Jordanian<br>construction sector                                                                             | Engineering construction and<br>architectural management | 2017 | 10.1108/ECAM-09-2015-0144          |    |    | X  |
| Arowoiya, VA; Oke, AE;<br>Aigbavboa, CO; Aliu, J                      | An appraisal of the adoption<br>internet of things (IoT)<br>elements for sustainable                                                                 | Journal of engineering design<br>and technology          |      | 10.1108/JEDT-10-2019-0270          | X  |    |    |
| Arroyo P., Tommelein I.D.,<br>Ballard G.                              | Comparing AHP and CBA as<br>decision methods to resolve<br>the choosing problem in<br>detailed design                                                | Journal of construction<br>engineering and management    | 2015 | 10.1061/(ASCE)CO.1943-7862.0000915 |    |    | X  |
| Arroyo P., Tommelein I.D.,<br>Ballard G.                              | Selecting globally sustainable<br>materials: A case study using<br>choosing by advantages                                                            | Journal of construction<br>engineering and management    | 2016 | 10.1061/(ASCE)CO.1943-7862.0001041 |    |    | X  |
| Asadi, K; Ramshankar, H;<br>Noghbaei, M; Han, K                       | Real-Time Image<br>Localization and Registration<br>with BIM Using Perspective<br>Alignment for Indoor<br>Monitoring of Construction                 | Journal of computing in civil<br>engineering             | 2019 | 10.1061/(ASCE)CP.1943-5487.0000847 | X  |    |    |

| Authors                                                              | Article Title                                                                                               | Source Title                                          | Year | DOI                                | C1 | C2 | C3 |
|----------------------------------------------------------------------|-------------------------------------------------------------------------------------------------------------|-------------------------------------------------------|------|------------------------------------|----|----|----|
| Asadi, P; Zeidi, JR; Mojibi, T; Yazdani-Chamzini, A; Tamosaitiene, J | PROJECT RISK EVALUATION BY USING A NEW FUZZY MODEL BASED ON ELENA GUIDELINE                                 | Journal of civil engineering and management           | 2018 | 10.3846/jcem.2018.3070             |    |    | X  |
| Asiedu R.O., Frempong N.K., Alfen H.W.                               | Predicting likelihood of cost overrun in educational                                                        | Engineering construction and architectural management | 2017 | 10.1108/ECAM-06-2015-0103          |    |    | X  |
| Aslam, M; Gao, ZL; Smith, G                                          | Framework for selection of lean construction tools based on lean objectives and                             | International journal of construction management      |      | 10.1080/15623599.2020.1729933      |    |    | X  |
| Assaad R., El-Adaway I.H., Abotaleb I.S.                             | Predicting Project Performance in the                                                                       | Journal of construction engineering and management    | 2020 | 10.1061/(ASCE)CO.1943-7862.0001797 |    |    | X  |
| Attarzadeh M., Chua D.K.H., Beer M., Abbott E.L.S.                   | Options-based negotiation management of PPP–BOT infrastructure projects                                     | Construction management and economics                 | 2017 | 10.1080/01446193.2017.1325962      |    |    | X  |
| Audet, R; Brisebois, E                                               | The Social Production of Food Waste at the Retail-Consumption Interface                                     | Sustainability                                        | 2019 | 10.3390/su11143834                 |    |    | X  |
| Austin R.B., Pishdad-Bozorgi P., De La Garza J.M.                    | Identifying and prioritizing best practices to achieve flash track projects                                 | Journal of construction engineering and management    | 2016 | 10.1061/(ASCE)CO.1943-7862.0001061 | X  |    | X  |
| Awolusi I.G., Marks E.D.                                             | Safety activity analysis framework to evaluate safety performance in construction                           | Journal of construction engineering and management    | 2017 | 10.1061/(ASCE)CO.1943-7862.0001265 |    |    | X  |
| Awuzie, B; Monyane, TG                                               | Conceptualizing Sustainability Governance Implementation for Infrastructure Delivery Systems in Developing  | Sustainability                                        | 2020 | 10.3390/su12030961                 |    |    | X  |
| Aydin, N                                                             | Designing reverse logistics network of end-of-life-buildings as preparedness to disasters under uncertainty | Journal of cleaner production                         | 2020 | 10.1016/j.jclepro.2020.120341      |    |    | X  |

| Authors                                            | Article Title                                                                                                                         | Source Title                                       | Year | DOI                                | C1 | C2 | C3 |
|----------------------------------------------------|---------------------------------------------------------------------------------------------------------------------------------------|----------------------------------------------------|------|------------------------------------|----|----|----|
| Azar E.R.                                          | Construction Equipment Identification Using Marker-Based Recognition and an Active Zoom Camera                                        | Journal of computing in civil engineering          | 2016 | 10.1061/(ASCE)CP.1943-5487.0000507 |    | X  |    |
| Azari R., Kim Y.-W.                                | Integration Evaluation Framework for Integrated Design Teams of Green Buildings: Development and Validation                           | Journal of management in engineering               | 2016 | 10.1061/(ASCE)ME.1943-5479.0000416 |    |    | X  |
| Azhar S., Choudhry R.M.                            | Capacity building in construction health and safety research, education, and practice in Pakistan                                     | Built environment project and asset management     | 2016 | 10.1108/BEPAM-09-2014-0044         |    |    | X  |
| Azhar, N; Kang, Y; Ahmad, I                        | Critical Look into the Relationship between Information and Communication Technology and Integrated Project Delivery in Public Sector | Journal of management in engineering               | 2015 | 10.1061/(ASCE)ME.1943-5479.0000334 | X  |    | X  |
| Babar, S; Thaheem, MJ; Ayub, B                     | Estimated Cost at Completion: Integrating Risk into Earned Value                                                                      | Journal of construction engineering and management | 2017 | 10.1061/(ASCE)CO.1943-7862.0001245 |    |    | X  |
| Babatunde, SO; Ekundayo, D; Adekunle, AO; Bello, W | Comparative analysis of drivers to BIM adoption among AEC firms in developing countries A case                                        | Journal of engineering design and technology       |      | 10.1108/JEDT-08-2019-0217          | X  |    |    |
| Badalpur, M; Nurbakhsh, E                          | An application of WASPAS method in risk qualitative analysis: a case study of a road construction project in                          | International journal of construction management   |      | 10.1080/15623599.2019.1595354      |    |    | X  |
| Badi, S                                            | Public sustainable-energy requirements and innovation in UK PFI school projects                                                       | Construction management and economics              | 2017 | 10.1080/01446193.2016.1237034      |    |    | X  |

| Authors                                              | Article Title                                                                                                                                                            | Source Title                                          | Year | DOI                                | C1 | C2 | C3 |
|------------------------------------------------------|--------------------------------------------------------------------------------------------------------------------------------------------------------------------------|-------------------------------------------------------|------|------------------------------------|----|----|----|
| Bae, H; Golparvar-Fard, M; White, J                  | Image-Based Localization and Content Authoring in Structure-from-Motion Point Cloud Models for Real-Time Field Reporting Applications                                    | Journal of computing in civil engineering             | 2015 | 10.1061/(ASCE)CP.1943-5487.0000392 | X  |    |    |
| Bagaya O., Song J.                                   | Empirical study of factors influencing schedule delays of public construction projects in Burkina Faso                                                                   | Journal of management in engineering                  | 2016 | 10.1061/(ASCE)ME.1943-5479.0000443 |    |    | X  |
| Bahadorestani A., Karlsen J.T., Motahari Farimani N. | A Comprehensive Stakeholder-Typology Model Based on Salience Attributes in Construction Projects                                                                         | Journal of construction engineering and management    | 2019 | 10.1061/(ASCE)CO.1943-7862.0001684 |    |    | X  |
| Bahadorestani, A; Karlsen, JT; Farimani, NM          | Novel Approach to Satisfying Stakeholders in Megaprojects: Balancing Planning for sustainable stakeholder engagement based on the assessment of conflicting interests in | Journal of management in engineering                  | 2020 | 10.1061/(ASCE)ME.1943-5479.0000734 |    |    | X  |
| Bahadorestani, A; Naderpajouh, N; Sadiq, R           | Seven-dimensional automated construction waste quantification and management framework: Integration with project and                                                     | Journal of cleaner production                         | 2020 | 10.1016/j.jclepro.2019.118402      |    |    | X  |
| Bakchan A., Faust K.M., Leite F.                     | Synthesis of decision-making research in construction                                                                                                                    | Resources, conservation and recycling                 | 2019 | 10.1016/j.resconrec.2019.02.020    |    | X  |    |
| Bakht M.N., El-Diraby T.E.                           | Optimized scheduling and buffering of repetitive construction projects under uncertainty                                                                                 | Journal of construction engineering and management    | 2015 | 10.1061/(ASCE)CO.1943-7862.0000984 |    |    | X  |
| Bakry I., Moselhi O., Zayed T.                       |                                                                                                                                                                          | Engineering construction and architectural management | 2016 | 10.1108/ECAM-05-2014-0069          |    |    | X  |



| Authors                                                                                                           | Article Title                                                                                                                    | Source Title                                             | Year | DOI                                | C1 | C2 | C3 |
|-------------------------------------------------------------------------------------------------------------------|----------------------------------------------------------------------------------------------------------------------------------|----------------------------------------------------------|------|------------------------------------|----|----|----|
| Balasubramani M.,<br>Mahalingam A., Scott W.R.                                                                    | Imitation and adaptation:<br>lessons from a case study of a<br>metro rail project in India                                       | Construction management<br>and economics                 | 2020 | 10.1080/01446193.2019.1619932      |    |    | X  |
| Baldissera, P; Delprete, C                                                                                        | From PBL to innovation: a<br>decennial case-study from an<br>HPV student team                                                    | Journal of engineering design<br>and technology          |      | 10.1108/JEDT-01-2019-0005          |    | X  |    |
| Ballesteros-Pérez P., Del<br>Campo-Hitschfeld M.L.,<br>González-Naranjo M.A.,<br>González-Cruz M.C.               | Climate and construction<br>delays: Case study in Chile                                                                          | Engineering construction and<br>architectural management | 2015 | 10.1108/ECAM-02-2015-0024          |    |    | X  |
| Ballesteros-Pérez P.,<br>González-Cruz M.C., Fuentes-<br>Bargues J.L., Skitmore M.                                | Analysis of the distribution<br>of the number of bidders in<br>construction contract                                             | Construction management<br>and economics                 | 2015 | 10.1080/01446193.2015.1090008      |    |    | X  |
| Ballesteros-Pérez P., Phua<br>F.T.T., Mora-Melià D.                                                               | Human Resource Allocation<br>to Multiple Projects Based on<br>Members' Expertise, Group<br>Heterogeneity, and Social<br>Cohesion | Journal of construction<br>engineering and management    | 2019 | 10.1061/(ASCE)CO.1943-7862.0001612 |    |    | X  |
| Ballesteros-Pérez P., Sanz-<br>Ablanedo E., Soetanto R.,<br>González-Cruz M.C., Larsen<br>G.D., Cerezo-Narváez A. | Duration and Cost Variability<br>of Construction Activities:<br>An Empirical Study                                               | Journal of construction<br>engineering and management    | 2020 | 10.1061/(ASCE)CO.1943-7862.0001739 |    |    | X  |
| Ballesteros-Pérez P.,<br>Skitmore M., Pellicer E.,<br>González-Cruz M.C.                                          | Scoring rules and abnormally<br>low bids criteria in<br>construction tenders: a                                                  | Construction management<br>and economics                 | 2015 | 10.1080/01446193.2015.1059951      |    |    | X  |
| Ballesteros-Pérez P.,<br>Skitmore M., Pellicer E.,<br>Gutiérrez-Bahamondes J.H.                                   | Improving the estimation of<br>probability of bidder<br>participation in procurement<br>auctions                                 | International journal of<br>project management           | 2016 | 10.1016/j.ijproman.2015.11.001     |    |    | X  |
| Ballesteros-Pérez P.,<br>Skitmore M., Sanz-Ablanedo<br>E., Verhoeven P.                                           | Forecasting the Number and<br>Distribution of New Bidders<br>for an Upcoming<br>Construction Auction                             | Journal of construction<br>engineering and management    | 2019 | 10.1061/(ASCE)CO.1943-7862.0001694 |    |    | X  |

| Authors                                                                                                    | Article Title                                                                                                                                            | Source Title                                       | Year | DOI                                | C1 | C2 | C3 |
|------------------------------------------------------------------------------------------------------------|----------------------------------------------------------------------------------------------------------------------------------------------------------|----------------------------------------------------|------|------------------------------------|----|----|----|
| Ballesteros-Pérez P., Smith S.T., Lloyd-Papworth J.G., Cooke P.                                            | Incorporating the effect of weather in construction scheduling and management with sine wave curves: application in the United Kingdom                   | Construction management and economics              | 2018 | 10.1080/01446193.2018.1478109      |    |    | X  |
| Ballesteros-Perez, P; Sanz-Ablanedo, E; Mora-Melia, D; Gonzalez-Cruz, MC; Fuentes-Bargues, JL; Pellicer, E | Earned Schedule min-max: Two new EVM metrics for monitoring and controlling projects                                                                     | Automation in construction                         | 2019 | 10.1016/j.autcon.2019.03.016       |    |    | X  |
| Bamana F., Lehoux N., Cloutier C.                                                                          | Simulation of a Construction Project: Assessing Impact of Just-in-Time and Lean Principles                                                               | Journal of construction engineering and management | 2019 | 10.1061/(ASCE)CO.1943-7862.0001654 |    |    | X  |
| Bamgbade J.A., Kamaruddeen A.M., Nawi M.N.M., Adeleke A.Q., Salimon M.G., Ajibike W.A.                     | Analysis of some factors driving ecological sustainability in construction firms                                                                         | Journal of cleaner production                      | 2019 | 10.1016/j.jclepro.2018.10.229      |    |    | X  |
| Bamgbade, JA; Kamaruddeen, AM; Nawi, MNM                                                                   | Malaysian construction firms' social sustainability via organizational innovativeness and government support: The mediating role of market               | Journal of cleaner production                      | 2017 | 10.1016/j.jclepro.2017.03.187      |    |    | X  |
| Bamgbade, JA; Nawi, MNM; Kamaruddeen, AM; Adeleke, AQ; Salimon, MG                                         | Building sustainability in the construction industry through firm capabilities, technology and business innovativeness: empirical evidence from Malaysia | International journal of construction management   |      | 10.1080/15623599.2019.1634666      |    |    | X  |

| Authors                                                                        | Article Title                                                                                                                                         | Source Title                                       | Year | DOI                                | C1 | C2 | C3 |
|--------------------------------------------------------------------------------|-------------------------------------------------------------------------------------------------------------------------------------------------------|----------------------------------------------------|------|------------------------------------|----|----|----|
| Banihashemi S., Hosseini M.R., Golizadeh H., Sankaran S.                       | Critical success factors (CSFs) for integration of sustainability into construction project management practices in                                   | International journal of project management        | 2017 | 10.1016/j.ijproman.2017.01.014     |    |    | X  |
| Banobi, ET; Jung, W                                                            | Causes and Mitigation Strategies of Delay in Power Construction Projects: Gaps between Owners and Contractors in Successful and Unsuccessful Projects | Sustainability                                     | 2019 | 10.3390/su11215973                 |    |    | X  |
| Bansal V.K.                                                                    | Use of GIS to consider spatial aspects in construction planning process                                                                               | International journal of construction management   | 2020 | 10.1080/15623599.2018.1484845      |    |    | X  |
| Baqerin M.H., Shafahi Y., Kashani H.                                           | Application of Weibull analysis to evaluate and forecast schedule performance in repetitive                                                           | Journal of construction engineering and management | 2016 | 10.1061/(ASCE)CO.1943-7862.0001040 |    |    | X  |
| Barry W., Leite F., O'Brien W.J.                                               | Late deliverable risk catalog: Evaluating the impacts and risks of late deliverables to construction sites                                            | Journal of construction engineering and management | 2015 | 10.1061/(ASCE)CO.1943-7862.0000950 | X  |    | X  |
| Batselier J., Vanhoucke M.                                                     | Construction and evaluation framework for a real-life project database                                                                                | International journal of project management        | 2015 | 10.1016/j.ijproman.2014.09.004     |    |    | X  |
| Batselier J., Vanhoucke M.                                                     | Empirical Evaluation of Earned Value Management Forecasting Accuracy for                                                                              | Journal of construction engineering and management | 2015 | 10.1061/(ASCE)CO.1943-7862.0001008 |    |    | X  |
| Behnam A., Wickramasinghe D.C., Ghaffar M.A.A., Vu T.T., Tang Y.H., Isa H.B.M. | Automated progress monitoring system for linear infrastructure projects using satellite remote sensing                                                | Automation in construction                         | 2016 | 10.1016/j.autcon.2016.05.002       | X  | X  |    |

| Authors                                                                                  | Article Title                                                                                                                                               | Source Title                                          | Year | DOI                                | C1 | C2 | C3 |
|------------------------------------------------------------------------------------------|-------------------------------------------------------------------------------------------------------------------------------------------------------------|-------------------------------------------------------|------|------------------------------------|----|----|----|
| Behnke N.L., Klug T., Cronk R., Shields K.F., Lee K., Kelly E.R., Allgood G., Bartram J. | Resource mobilization for community-managed rural water systems: Evidence from Ghana, Kenya, and                                                            | Journal of cleaner production                         | 2017 | 10.1016/j.jclepro.2017.04.016      |    |    | X  |
| Beitelmal, W; Molenaar, KR; Javernick-Will, A; Pellicer, E                               | Challenges and barriers to establishing infrastructure asset management                                                                                     | Engineering construction and architectural management | 2017 | 10.1108/ECAM-12-2015-0200          |    |    | X  |
| Beltrão L.M.P., Carvalho M.T.M.                                                          | Prioritizing Construction Risks Using Fuzzy AHP in Brazilian Public Enterprises                                                                             | Journal of construction engineering and management    | 2019 | 10.1061/(ASCE)CO.1943-7862.0001606 |    |    | X  |
| Benghi C.                                                                                | Automated verification for collaborative workflows in a Digital Plan of Work                                                                                | Automation in construction                            | 2019 | 10.1016/j.autcon.2019.102926       |    | X  | X  |
| Bengtsson, SH                                                                            | Coordinated construction logistics: an innovation perspective                                                                                               | Construction management and economics                 | 2019 | 10.1080/01446193.2018.1528372      |    |    | X  |
| Benitez-Avila, C; Hartmann, A; Dewulf, G; Henseler, J                                    | Interplay of relational and contractual governance in public-private partnerships: The mediating role of relational norms, trust and partners' contribution | International journal of project management           | 2018 | 10.1016/j.ijproman.2017.12.005     |    |    | X  |
| Benjaoran V., Tabyang W., Sooksil N.                                                     | Precedence relationship options for the resource levelling problem using a genetic algorithm                                                                | Construction management and economics                 | 2015 | 10.1080/01446193.2015.1100317      |    |    | X  |
| Berezin, A; Sergi, BS; Gorodnova, N                                                      | Efficiency Assessment of Public-Private Partnership (PPP) Projects: The Case of Russia                                                                      | Sustainability                                        | 2018 | 10.3390/su10103713                 |    |    | X  |

| Authors                                               | Article Title                                                                                                                             | Source Title                                             | Year | DOI                                | C1 | C2 | C3 |
|-------------------------------------------------------|-------------------------------------------------------------------------------------------------------------------------------------------|----------------------------------------------------------|------|------------------------------------|----|----|----|
| Bergmann, P; Kamaras, E;<br>Gleissner, W; Guenther, E | Enhanced Cash Flow<br>Valuation in Real Estate<br>Management by Integrating<br>Innovative Materials and                                   | Sustainability                                           | 2020 | 10.3390/su12062201                 |    |    | X  |
| Bernardi, E; Carlucci, S;<br>Cornaro, C; Bohne, RA    | An Analysis of the Most<br>Adopted Rating Systems for<br>Assessing the Environmental<br>Impact of Buildings                               | Sustainability                                           | 2017 | 10.3390/su9071226                  |    |    | X  |
| Berteaux F., Javernick-Will<br>A.                     | Adaptation and integration<br>for multinational project-<br>based organizations                                                           | Journal of management in<br>engineering                  | 2015 | 10.1061/(ASCE)ME.1943-5479.0000366 |    |    | X  |
| Besaiso H., Fenn P., Emsley<br>M., Wright D.          | A comparison of the<br>suitability of FIDIC and NEC<br>conditions of contract in<br>Palestine: A perspective from                         | Engineering construction and<br>architectural management | 2018 | 10.1108/ECAM-10-2016-0235          |    | X  | X  |
| Besklubova, S; Zhang, XQ                              | Improving Construction<br>Productivity by Integrating<br>the Lean Concept and the<br>Clancey Heuristic Model                              | Sustainability                                           | 2019 | 10.3390/su11174535                 |    |    | X  |
| Bettemir Ö.H., Sonmez R.                              | Hybrid genetic algorithm<br>with simulated annealing for<br>resource-constrained project                                                  | Journal of management in<br>engineering                  | 2015 | 10.1061/(ASCE)ME.1943-5479.0000323 |    |    | X  |
| Bevan W., Lu S.-L., Sexton<br>M.                      | Skills required to deliver<br>energy efficient school                                                                                     | Engineering construction and<br>architectural management | 2020 | 10.1108/ECAM-03-2019-0126          |    |    | X  |
| Bi L., Ren B., Zhong D., Hu<br>L.                     | Real-time construction<br>schedule analysis of long-<br>distance diversion tunnels<br>based on lithological<br>predictions using a markov | Journal of construction<br>engineering and management    | 2015 | 10.1061/(ASCE)CO.1943-7862.0000935 |    |    | X  |
| Biagini C., Capone P.,<br>Donato V., Facchini N.      | Towards the BIM<br>implementation for historical<br>building restoration sites                                                            | Automation in construction                               | 2016 | 10.1016/j.autcon.2016.03.003       |    |    | X  |

| Authors                                             | Article Title                                                                                                                               | Source Title                                       | Year | DOI                                | C1 | C2 | C3 |
|-----------------------------------------------------|---------------------------------------------------------------------------------------------------------------------------------------------|----------------------------------------------------|------|------------------------------------|----|----|----|
| Biesenthal C., Clegg S., Mahalingam A., Sankaran S. | Applying institutional theories to managing                                                                                                 | International journal of project management        | 2018 | 10.1016/j.ijproman.2017.06.006     |    |    | X  |
| Bijleveld, FR; Miller, SR; Doree, AG                | Making Operational Strategies of Asphalt Teams Explicit to Reduce Process                                                                   | Journal of construction engineering and management | 2015 | 10.1061/(ASCE)CO.1943-7862.0000969 |    |    | X  |
| Bilau, AA; Witt, E; Lill, I                         | Practice Framework for the Management of Post-Disaster Housing Reconstruction Programmes                                                    | Sustainability                                     | 2018 | 10.3390/su10113929                 |    |    | X  |
| Bingham E., Edward Gibson G., El Asmar M.           | Identifying Team Selection and Alignment Factors by Delivery Method for Transportation Projects                                             | Journal of construction engineering and management | 2019 | 10.1061/(ASCE)CO.1943-7862.0001704 |    |    | X  |
| Bingham E., Gibson G.E., Asmar M.E.                 | Measuring User Perceptions of Popular Transportation Project Delivery Methods Using Least Significant Difference Intervals and              | Journal of construction engineering and management | 2018 | 10.1061/(ASCE)CO.1943-7862.0001469 |    |    | X  |
| Birgonul M.T., Dikmen I., Bektas S.                 | Integrated approach to overcome shortcomings in current delay analysis                                                                      | Journal of construction engineering and management | 2015 | 10.1061/(ASCE)CO.1943-7862.0000946 |    |    | X  |
| Biygautane M., Neesham C., Al-Yahya K.O.            | Institutional entrepreneurship and infrastructure public-private partnership (PPP): Unpacking the role of social actors in implementing PPP | International journal of project management        | 2019 | 10.1016/j.ijproman.2018.12.005     |    |    | X  |
| Blomquist T., Farashah A.D., Thomas J.              | Project management self-efficacy as a predictor of project performance: Constructing and validating a domain-specific scale                 | International journal of project management        | 2016 | 10.1016/j.ijproman.2016.07.010     |    |    | X  |

| Authors                                         | Article Title                                                                                                | Source Title                                       | Year | DOI                                | C1 | C2 | C3 |
|-------------------------------------------------|--------------------------------------------------------------------------------------------------------------|----------------------------------------------------|------|------------------------------------|----|----|----|
| Blomquist, T; Farashah, AD; Thomas, J           | Feeling good, being good and looking good: Motivations for, and benefits from, project management            | International journal of project management        | 2018 | 10.1016/j.ijproman.2017.11.006     |    |    | X  |
| Boateng P., Chen Z., Ogunlana S.O.              | An Analytical Network Process model for risks prioritisation in megaprojects                                 | International journal of project management        | 2015 | 10.1016/j.ijproman.2015.08.007     |    |    | X  |
| Bohari A.A.M., Skitmore M., Xia B., Teo M.      | Green oriented procurement for building projects: Preliminary findings from                                  | Journal of cleaner production                      | 2017 | 10.1016/j.jclepro.2017.01.141      |    | X  | X  |
| Borges W.F., Mário P.D.C.                       | Five Project-Duration Control Methods in Time Units: Case Study of a Linearly Distributed Planned            | Journal of construction engineering and management | 2017 | 10.1061/(ASCE)CO.1943-7862.0001280 |    |    | X  |
| Borja, LCA; Cesar, SF; Cunha, RDA; Kiperstok, A | A Quantitative Method for Prediction of Environmental Aspects in Construction Sites of Residential Buildings | Sustainability                                     | 2018 | 10.3390/su10061870                 |    |    | X  |
| Bortolini R., Formoso C.T., Viana D.D.          | Site logistics planning and control for engineer-to-order prefabricated building systems using BIM 4D        | Automation in construction                         | 2019 | 10.1016/j.autcon.2018.11.031       |    |    | X  |
| Bosche, F; Abdel-Wahab, M; Carozza, L           | Towards a Mixed Reality System for Construction Trade Training                                               | Journal of computing in civil engineering          | 2016 | 10.1061/(ASCE)CP.1943-5487.0000479 | X  |    |    |
| Bosch-Sijtsema P., Gluch P.                     | Challenging construction project management institutions: the role and                                       | International journal of construction management   | 2019 | 10.1080/15623599.2019.1602585      |    |    | X  |
| Bosch-Sijtsema P.M., Tjell J.                   | The concept of project space: Studying construction project teams from a spatial                             | International journal of project management        | 2017 | 10.1016/j.ijproman.2017.05.009     |    |    | X  |

| Authors                                                           | Article Title                                                                                                                         | Source Title                                          | Year | DOI                                | C1 | C2 | C3 |
|-------------------------------------------------------------------|---------------------------------------------------------------------------------------------------------------------------------------|-------------------------------------------------------|------|------------------------------------|----|----|----|
| Bossink, B                                                        | The influence of knowledge flow on sustainable innovation in a project-based industry: From demonstration to limited adoption of eco- | Journal of cleaner production                         | 2018 | 10.1016/j.jclepro.2018.05.063      |    |    | X  |
| Boutilier R.G., Zdziarski M.                                      | Managing stakeholder networks for a social license                                                                                    | Construction management and economics                 | 2017 | 10.1080/01446193.2017.1289229      |    |    | X  |
| Bowen P., Govender R., Edwards P., Cattell K.                     | An explanatory model of attitudinal fear of HIV/AIDS testing in the construction industry                                             | Engineering construction and architectural management | 2016 | 10.1108/ECAM-10-2014-0134          |    |    | X  |
| Bowen, P; Govender, R; Edwards, P; Cattell, K; Street, A          | Factors Determining South African Construction Workers' Prejudice towards and Discrimination against HIV plus Persons                 | Journal of construction engineering and management    | 2015 | 10.1061/(ASCE)CO.1943-7862.0000995 |    |    | X  |
| Brady D.A., Tzortzopoulos P., Rooke J., Formoso C.T., Tezel A.    | Improving transparency in construction management: a visual planning and control model                                                | Engineering construction and architectural management | 2018 | 10.1108/ECAM-07-2017-0122          | X  |    | X  |
| Bragadin M.A., Kähkönen K.                                        | Schedule health assessment of construction projects                                                                                   | Construction management and economics                 | 2016 | 10.1080/01446193.2016.1205751      |    |    | X  |
| Brescia-Norambuena, L; Pickel, D; Gonzalez, M; Tighe, SL; Azua, G | Accelerated construction as a new approach for underground-mining pavement: Productivity, cost and environmental study                | Journal of cleaner production                         | 2020 | 10.1016/j.jclepro.2019.119605      |    |    | X  |
| Bresnen M.                                                        | Being careful what we wish for? Challenges and opportunities afforded through engagement with business and management                 | Construction management and economics                 | 2017 | 10.1080/01446193.2016.1270462      |    |    | X  |



| Authors                                                      | Article Title                                                                                                 | Source Title                                       | Year | DOI                                | C1 | C2 | C3 |
|--------------------------------------------------------------|---------------------------------------------------------------------------------------------------------------|----------------------------------------------------|------|------------------------------------|----|----|----|
| Briere, S; Proulx, D; Flores, ON; Laporte, M                 | Competencies of project managers in international NGOs: Perceptions of practitioners                          | International journal of project management        | 2015 | 10.1016/j.ijproman.2014.04.010     |    |    | X  |
| Brockmann C., Brezinski H., Erbe A.                          | Innovation in Construction Megaprojects                                                                       | Journal of construction engineering and management | 2016 | 10.1061/(ASCE)CO.1943-7862.0001168 |    |    | X  |
| Broft R., Badi S.M., Pryke S.                                | Towards supply chain maturity in construction                                                                 | Built environment project and asset management     | 2016 | 10.1108/BEPAM-09-2014-0050         |    |    | X  |
| Brooks T., Spillane J., Tansey P., Hendron C.                | The impact of the recent economic recession on the operation of the NEC contract in Northern Ireland          | Construction management and economics              | 2016 | 10.1080/01446193.2016.1194522      |    | X  | X  |
| Bröchner J.                                                  | Construction economics and economics journals                                                                 | Construction management and economics              | 2018 | 10.1080/01446193.2017.1410197      |    | X  | X  |
| Budayan C.                                                   | Evaluation of Delay Causes for BOT Projects Based on Perceptions of Different Stakeholders in Turkey          | Journal of management in engineering               | 2019 | 10.1061/(ASCE)ME.1943-5479.0000668 |    |    | X  |
| Budayan C., Dikmen I., Birgonul M.T.                         | Alignment of project management with business strategy in construction: Evidence from the Turkish contractors | Journal of civil engineering and management        | 2015 | 10.3846/13923730.2013.802737       |    |    | X  |
| Bueno M., González-Jorge H., Martínez-Sánchez J., Lorenzo H. | Automatic point cloud coarse registration using geometric keypoint descriptors for indoor scenes              | Automation in construction                         | 2017 | 10.1016/j.autcon.2017.06.016       |    | X  |    |
| Bugajev, A; Sostak, OR                                       | An Algorithm for Modelling the Impact of the Judicial Conflict-Resolution Process on Construction Investment  | Sustainability                                     | 2018 | 10.3390/su10010182                 |    |    | X  |

| Authors                                           | Article Title                                                                                                                      | Source Title                                          | Year | DOI                                | C1 | C2 | C3 |
|---------------------------------------------------|------------------------------------------------------------------------------------------------------------------------------------|-------------------------------------------------------|------|------------------------------------|----|----|----|
| Burga R., Rezanian D.                             | Project accountability: An exploratory case study using actor–network theory                                                       | International journal of project management           | 2017 | 10.1016/j.ijproman.2017.05.001     |    |    | X  |
| Burke R.D., Parrish K., El Asmar M.               | Environmental Product Declarations: Use in the Architectural and Engineering Design Process to Support Sustainable                 | Journal of construction engineering and management    | 2018 | 10.1061/(ASCE)CO.1943-7862.0001481 |    |    | X  |
| Buvik M.P., Rolfsen M.                            | Prior ties and trust development in project teams - A case study from the                                                          | International journal of project management           | 2015 | 10.1016/j.ijproman.2015.06.002     |    |    | X  |
| Bygballe L.E., Swärd A.R., Vaagaasar A.L.         | Coordinating in construction projects and the emergence of synchronized readiness                                                  | International journal of project management           | 2016 | 10.1016/j.ijproman.2016.08.006     |    |    | X  |
| Bygballe, LE; Endresen, M; Falun, S               | The role of formal and informal mechanisms in implementing lean principles in construction projects                                | Engineering construction and architectural management | 2018 | 10.1108/ECAM-07-2017-0138          |    |    | X  |
| Bypaneni S.P.K., Tran D.Q.                        | Empirical Identification and Evaluation of Risk in Highway Project Delivery                                                        | Journal of management in engineering                  | 2018 | 10.1061/(ASCE)ME.1943-5479.0000602 |    |    | X  |
| Böhme T., Escibano A., Heffernan E.E., Beazley S. | Causes and mitigation for declining productivity in the Australian mid-rise residential construction                               | Built environment project and asset management        | 2018 | 10.1108/BEPAM-10-2017-0097         |    |    | X  |
| Cajzek R., Klanšek U.                             | Cost optimization of project schedules under constrained resources and alternative production processes by mixed-integer nonlinear | Engineering construction and architectural management | 2019 | 10.1108/ECAM-01-2019-0013          |    |    | X  |
| Caldas C., Gupta A.                               | Critical factors impacting the performance of mega-                                                                                | Engineering construction and architectural management | 2017 | 10.1108/ECAM-05-2016-0117          |    |    | X  |

| Authors                                                                  | Article Title                                                                                                         | Source Title                                       | Year | DOI                                | C1 | C2 | C3 |
|--------------------------------------------------------------------------|-----------------------------------------------------------------------------------------------------------------------|----------------------------------------------------|------|------------------------------------|----|----|----|
| Caldas C.H., Kim J.-Y., Haas C.T., Goodrum P.M., Zhang D.                | Method to assess the level of implementation of productivity practices on                                             | Journal of construction engineering and management | 2015 | 10.1061/(ASCE)CO.1943-7862.0000919 |    | X  | X  |
| Camarasa C., Heiberger R., Hennes L., Jakob M., Ostermeyer Y., Rosado L. | Key decision-makers and persuaders in the selection of energy-efficient technologies in EU residential buildings      | Buildings                                          | 2020 | 10.3390/BUILDINGS10040070          | X  |    |    |
| Cao D., Li H., Wang G., Huang T.                                         | Identifying and contextualising the motivations for BIM implementation in construction projectsAn                     | International journal of project management        | 2017 | 10.1016/j.ijproman.2016.02.002     |    |    | X  |
| Cao M.-T., Cheng M.-Y., Wu Y.-W.                                         | Hybrid computational model for forecasting Taiwan construction cost index                                             | Journal of construction engineering and management | 2015 | 10.1061/(ASCE)CO.1943-7862.0000948 |    |    | X  |
| Cao X., Li X., Zhu Y., Zhang Z.                                          | A comparative study of environmental performance between prefabricated and traditional residential buildings in China | Journal of cleaner production                      | 2015 | 10.1016/j.jclepro.2015.04.120      |    |    | X  |
| Cao Y., Ashuri B.                                                        | Predicting the Volatility of Highway Construction Cost Index Using Long Short-Term Memory                             | Journal of management in engineering               | 2020 | 10.1061/(ASCE)ME.1943-5479.0000784 |    |    | X  |
| Cao, DP; Wang, GB; Li, H; Skitmore, M; Huang, T; Zhang, WY               | Practices and effectiveness of building information modelling in construction                                         | Automation in construction                         | 2015 | 10.1016/j.autcon.2014.10.014       |    |    | X  |
| Carbonara N., Pellegrino R.                                              | Revenue guarantee in public–private partnerships: a win–win model                                                     | Construction management and economics              | 2018 | 10.1080/01446193.2018.1467028      |    |    | X  |

| Authors                                     | Article Title                                                                                                    | Source Title                                       | Year | DOI                                | C1 | C2 | C3 |
|---------------------------------------------|------------------------------------------------------------------------------------------------------------------|----------------------------------------------------|------|------------------------------------|----|----|----|
| Cardenas I.C., Voordijk H., Dewulf G.       | Beyond theory: Towards a probabilistic causation model to support project governance in infrastructure projects  | International journal of project management        | 2017 | 10.1016/j.ijproman.2017.01.002     |    |    | X  |
| Carpenter N., Bausman D.C.                  | Project Delivery Method Performance for Public School Construction: Design-Bid-Build versus CM at Risk           | Journal of construction engineering and management | 2016 | 10.1061/(ASCE)CO.1943-7862.0001155 |    |    | X  |
| Carvalho, MM; Rabechini, R                  | Can project sustainability management impact project success? An empirical study applying a contingent           | International journal of project management        | 2017 | 10.1016/j.ijproman.2017.02.018     |    |    | X  |
| Castillo G., Alarcón L.F., González V.A.    | Implementing lean production in copper mining development projects: Case                                         | Journal of construction engineering and management | 2015 | 10.1061/(ASCE)CO.1943-7862.0000917 |    |    | X  |
| Castillo T., Alarcón L.F., Pellicer E.      | Finding Differences among Construction Companies' Management Practices and Their Relation to Project Performance | Journal of management in engineering               | 2018 | 10.1061/(ASCE)ME.1943-5479.0000606 | X  |    | X  |
| Castillo T., Alarcón L.F., Salvatierra J.L. | Effects of Last Planner System Practices on Social Networks and the Performance of Construction                  | Journal of construction engineering and management | 2018 | 10.1061/(ASCE)CO.1943-7862.0001443 |    |    | X  |
| Castillo, T; Alarcon, LF; Pellicer, E       | Influence of Organizational Characteristics on Construction Project Performance Using Corporate                  | Journal of management in engineering               | 2018 | 10.1061/(ASCE)ME.1943-5479.0000612 |    |    | X  |
| Cattell K., Bowen P., Edwards P.            | Stress among South African construction professionals: a job demand-control-support                              | Construction management and economics              | 2016 | 10.1080/01446193.2016.1203967      |    |    | X  |

| Authors                                                         | Article Title                                                                                            | Source Title                                          | Year | DOI                                | C1 | C2 | C3 |
|-----------------------------------------------------------------|----------------------------------------------------------------------------------------------------------|-------------------------------------------------------|------|------------------------------------|----|----|----|
| Cavka H.B., Staub-French S., Poirier E.A.                       | Developing owner information requirements for BIM-enabled project delivery and asset management          | Automation in construction                            | 2017 | 10.1016/j.autcon.2017.08.006       |    |    | X  |
| Çelik G.T., Oral E.L.                                           | Mediating effect of job satisfaction on the organizational commitment of civil engineers and             | International journal of construction management      | 2019 | 10.1080/15623599.2019.1602578      |    |    | X  |
| Cha, Y; Kim, J; Hyun, CT; Han, S                                | Development of a Program Definition Rating Index for the Performance Prediction of Construction Programs | Sustainability                                        | 2018 | 10.3390/su10082747                 |    |    | X  |
| Chalekaee, A; Turskis, Z; Khanzadi, M; Amiri, GG; Kersulienė, V | A New Hybrid MCDM Model with Grey Numbers for the Construction Delay Change Response Problem             | Sustainability                                        | 2019 | 10.3390/su11030776                 |    |    | X  |
| Chalhoub J., Ayer S.K.                                          | Using Mixed Reality for electrical construction design communication                                     | Automation in construction                            | 2018 | 10.1016/j.autcon.2017.10.028       | X  |    |    |
| Chalker, M; Loosemore, M                                        | Trust and productivity in Australian construction projects: a subcontractor                              | Engineering construction and architectural management | 2016 | 10.1108/ECAM-06-2015-0090          |    |    | X  |
| Chan A.P.C., Chiang Y.-H., Wong F.K.-W., Liang S., Abidoye F.A. | Work-Life Balance for Construction Manual Workers                                                        | Journal of construction engineering and management    | 2020 | 10.1061/(ASCE)CO.1943-7862.0001800 |    | X  | X  |
| Chan A.P.C., Oppong G.D.                                        | Managing the expectations of external stakeholders in construction projects                              | Engineering construction and architectural management | 2017 | 10.1108/ECAM-07-2016-0159          |    |    | X  |
| Chan D.W.M., Olawumi T.O., Ho A.M.L.                            | Critical success factors for building information modelling (BIM) implementation in Hong                 | Engineering construction and architectural management | 2019 | 10.1108/ECAM-05-2018-0204          |    |    | X  |

| Authors                                              | Article Title                                                                                                                    | Source Title                                       | Year | DOI                                | C1 | C2 | C3 |
|------------------------------------------------------|----------------------------------------------------------------------------------------------------------------------------------|----------------------------------------------------|------|------------------------------------|----|----|----|
| Chan P.W.                                            | Expert knowledge in the making: using a processual lens to examine expertise in construction                                     | Construction management and economics              | 2016 | 10.1080/01446193.2016.1190851      |    |    | X  |
| Chan, APC; Darko, A; Olanipekun, AO; Ameyaw, EE      | Critical barriers to green building technologies adoption in developing countries: The case of Ghana                             | Journal of cleaner production                      | 2018 | 10.1016/j.jclepro.2017.10.235      |    |    | X  |
| Chan, APC; Yang, Y; Darko, A                         | Construction Accidents in a Large-Scale Public Infrastructure Project: Severity and Prevention                                   | Journal of construction engineering and management | 2018 | 10.1061/(ASCE)CO.1943-7862.0001545 |    |    | X  |
| Chang C.-Y.                                          | Risk-bearing capacity as a new dimension to the analysis of project                                                              | International journal of project management        | 2015 | 10.1016/j.ijproman.2015.02.003     |    |    | X  |
| Chang C.-Y., Ko J.-W.                                | New Approach to Estimating the Standard Deviations of Lognormal Cost Variables in the Monte Carlo Analysis of Construction Risks | Journal of construction engineering and management | 2017 | 10.1061/(ASCE)CO.1943-7862.0001207 |    |    | X  |
| Chang M.-C., Shih S.-G., Schmitt G.                  | Information theory-based approach for constructability assessment in truss structural systems                                    | Automation in construction                         | 2017 | 10.1016/j.autcon.2017.06.010       | X  |    |    |
| Chang T., Deng X., Hwang B.-G., Zhao X.              | Improving Quantitative Assessment of Political Risk in International Construction Projects: The Case of Chinese Construction     | Journal of construction engineering and management | 2019 | 10.1061/(ASCE)CO.1943-7862.0001738 |    |    | X  |
| Chang, AS; Chang, HJ; Tsai, CY; Yang, SH; Muench, ST | Strategy of indicator incorporation for roadway sustainability certification                                                     | Journal of cleaner production                      | 2018 | 10.1016/j.jclepro.2018.08.047      |    |    | X  |

| Authors                                                                | Article Title                                                                                                                                           | Source Title                                          | Year | DOI                                | C1 | C2 | C3 |
|------------------------------------------------------------------------|---------------------------------------------------------------------------------------------------------------------------------------------------------|-------------------------------------------------------|------|------------------------------------|----|----|----|
| Chang, CK; Hanna, AS; Woo, S; Cho, CS                                  | Logistic Regression Modeling to Determine Projects impacted by                                                                                          | KSCE journal of civil engineering                     | 2019 | 10.1007/s12205-019-2056-0          |    | X  |    |
| Chang, CY; Pan, WJ; Howard, R                                          | Impact of Building Information Modeling Implementation on the Acceptance of Integrated Delivery Systems: Structural                                     | Journal of construction engineering and management    | 2017 | 10.1061/(ASCE)CO.1943-7862.0001335 | X  |    | X  |
| Chang, RD; Zuo, J; Zhao, ZY; Soebarto, V; Lu, YJ; Zillante, G; Gan, XL | Sustainability attitude and performance of construction enterprises: A China study                                                                      | Journal of cleaner production                         | 2018 | 10.1016/j.jclepro.2017.10.277      |    |    | X  |
| Chang, TY; Deng, XP; Hwang, BG                                         | Investigating Political Risk Paths in International High-Speed Railway Projects: The Case of Chinese International Contractors                          | Sustainability                                        | 2019 | 10.3390/su11154157                 |    |    | X  |
| Chang, TY; Deng, XP; Zuo, J; Yuan, JF                                  | Political Risks in Central Asian Countries: Factors and Strategies                                                                                      | Journal of management in engineering                  | 2018 | 10.1061/(ASCE)ME.1943-5479.0000588 |    |    | X  |
| Chang, YZ; Yang, Y; Dong, SC                                           | Comprehensive Sustainability Evaluation of High-Speed Railway (HSR) Construction Projects Based on Unascertained Measure and Analytic Hierarchy Process | Sustainability                                        | 2018 | 10.3390/su10020408                 |    |    | X  |
| Chang-Richards, Y; Wilkinson, S; Seville, E; Brunson, D                | Effects of a major disaster on skills shortages in the construction industry Lessons learned from New Zealand                                           | Engineering construction and architectural management | 2017 | 10.1108/ECAM-03-2014-0044          |    |    | X  |
| Chaphalkar N.B., Iyer K.C., Patil S.K.                                 | Prediction of outcome of construction dispute claims using multilayer perceptron neural network model                                                   | International journal of project management           | 2015 | 10.1016/j.ijproman.2015.09.002     |    |    | X  |

| Authors                                                            | Article Title                                                                                                            | Source Title                                          | Year | DOI                                | C1 | C2 | C3 |
|--------------------------------------------------------------------|--------------------------------------------------------------------------------------------------------------------------|-------------------------------------------------------|------|------------------------------------|----|----|----|
| Charkhakan M.H., Heravi G.                                         | Evaluating the preventability of conflicts arising from change occurrence in construction projects                       | Engineering construction and architectural management | 2019 | 10.1108/ECAM-09-2018-0361          |    |    | X  |
| Charkhakan M.H., Heravi G.                                         | Risk Manageability Assessment to Improve Risk Response Plan: Case Study of Construction Projects in Iran                 | Journal of construction engineering and management    | 2018 | 10.1061/(ASCE)CO.1943-7862.0001562 |    |    | X  |
| Che Ibrahim C.K.I., Mohamad Sabri N.A., Belayutham S., Mahamadu A. | Exploring behavioural factors for information sharing in BIM projects in the Malaysian construction                      | Built environment project and asset management        | 2019 | 10.1108/BEPAM-02-2018-0042         | X  |    |    |
| Che Ibrahim C.K.I., Rahmat A., Belayutham S., Costello S.B.        | Developing a temporary multi-organization integration performance index for delivering construction projects in Malaysia | International journal of construction management      | 2020 | 10.1080/15623599.2018.1484865      |    |    | X  |
| Chen C.-S., Tsui Y.-K., Dzeng R.-J., Wang W.-C.                    | Application of project-based change management in construction: A case study                                             | Journal of civil engineering and management           | 2015 | 10.3846/13923730.2013.802712       |    |    | X  |
| Chen G., Zhang G., Xie Y.M.                                        | Impact of transaction attributes on transaction costs in project alliances: Disaggregated analysis                       | Journal of management in engineering                  | 2015 | 10.1061/(ASCE)ME.1943-5479.0000259 |    |    | X  |
| Chen G.-X., Shan M., Chan A.P.C., Liu X., Zhao Y.-Q.               | Investigating the causes of delay in grain bin construction projects: the                                                | International journal of construction management      | 2019 | 10.1080/15623599.2017.1354514      |    |    | X  |
| Chen K., Lu W., Peng Y., Rowlinson S., Huang G.Q.                  | Bridging BIM and building: From a literature review to an integrated conceptual framework                                | International journal of project management           | 2015 | 10.1016/j.ijproman.2015.03.006     |    |    | X  |



| Authors                                                  | Article Title                                                                                                                     | Source Title                                       | Year | DOI                                | C1 | C2 | C3 |
|----------------------------------------------------------|-----------------------------------------------------------------------------------------------------------------------------------|----------------------------------------------------|------|------------------------------------|----|----|----|
| Chen L., Chen L., Lu Q., Zhao X.                         | Rethinking the Construction Schedule Risk of Infrastructure Projects Based on Dialectical Systems and                             | Journal of management in engineering               | 2020 | 10.1061/(ASCE)ME.1943-5479.0000829 |    |    | X  |
| Chen L., Manley K., Lewis J., Helfer F., Widen K.        | Procurement and Governance Choices for Collaborative Infrastructure Projects                                                      | Journal of construction engineering and management | 2018 | 10.1061/(ASCE)CO.1943-7862.0001525 |    |    | X  |
| Chen P.-H., Nguyen T.C.                                  | A BIM-WMS integrated decision support tool for supply chain management in construction                                            | Automation in construction                         | 2019 | 10.1016/j.autcon.2018.11.019       |    |    | X  |
| Chen T., Fu M., Liu R., Xu X., Zhou S., Liu B.           | How do project management competencies change within the project management career model in large Chinese construction companies? | International journal of project management        | 2019 | 10.1016/j.ijproman.2018.12.002     |    |    | X  |
| Chen T.-T., Wang C.-H.                                   | Fall risk assessment of bridge construction using Bayesian network transferring from fault tree analysis                          | Journal of civil engineering and management        | 2017 | 10.3846/13923730.2015.1068841      |    |    | X  |
| Chen X., Lu W.                                           | Identifying factors influencing demolition waste generation in Hong Kong                                                          | Journal of cleaner production                      | 2017 | 10.1016/j.jclepro.2016.09.164      |    |    | X  |
| Chen X., Thorp K.R., van Oel P.R., Xu Z., Zhou B., Li Y. | Environmental impact assessment of water-saving irrigation systems across 60 irrigation construction projects in northern China   | Journal of cleaner production                      | 2020 | 10.1016/j.jclepro.2019.118883      |    |    | X  |
| Chen Y., Wang W., Zhang S., You J.                       | Understanding the multiple functions of construction contracts: the anatomy of FIDIC model contracts                              | Construction management and economics              | 2018 | 10.1080/01446193.2018.1449955      |    |    | X  |

| Authors                                                | Article Title                                                                                                                   | Source Title                                          | Year | DOI                                | C1 | C2 | C3 |
|--------------------------------------------------------|---------------------------------------------------------------------------------------------------------------------------------|-------------------------------------------------------|------|------------------------------------|----|----|----|
| Chen, K; Lu, WS                                        | Bridging BIM and building (BBB) for information management in construction<br>The underlying mechanism and implementation       | Engineering construction and architectural management | 2019 | 10.1108/ECAM-05-2018-0206          | X  |    | X  |
| Chen, Q; de Soto, BG; Adey, BT                         | Construction automation: Research areas, industry concerns and suggestions for advancement                                      | Automation in construction                            | 2018 | 10.1016/j.autcon.2018.05.028       |    | X  |    |
| Chen, RS; Tsai, CM                                     | Development of an Evaluation System for Sustaining Reservoir Functions-A Case Study of                                          | Sustainability                                        | 2017 | 10.3390/su9081387                  |    |    | X  |
| Chen, WT; Merrett, HC; Lu, ST; Mortis, L               | Analysis of Key Failure Factors in Construction Partnering-A Case Study of                                                      | Sustainability                                        | 2019 | 10.3390/su11143994                 |    |    | X  |
| Chen, YL; Yin, YL; Browne, GJ; Li, DH                  | Adoption of building information modeling in Chinese construction industry<br>The technology-organization-environment framework | Engineering construction and architectural management | 2019 | 10.1108/ECAM-11-2017-0246          |    |    | X  |
| Chen, YQ; Zhang, SJ; Liu, LS; Hu, J                    | Risk perception and propensity in bid/no-bid decision-making of                                                                 | Engineering construction and architectural management | 2015 | 10.1108/ECAM-01-2013-0011          |    |    | X  |
| Cheng C.-F., Rashidi A., Davenport M.A., Anderson D.V. | Activity analysis of construction equipment using audio signals and support                                                     | Automation in construction                            | 2017 | 10.1016/j.autcon.2017.06.005       |    |    | X  |
| Cheng E.W.L.                                           | Intentions to form project partnering in Hong Kong: Application of the theory of planned behavior                               | Journal of construction engineering and management    | 2016 | 10.1061/(ASCE)CO.1943-7862.0001200 |    |    | X  |

| Authors                                           | Article Title                                                                                                            | Source Title                                          | Year | DOI                                | C1 | C2 | C3 |
|---------------------------------------------------|--------------------------------------------------------------------------------------------------------------------------|-------------------------------------------------------|------|------------------------------------|----|----|----|
| Cheng M., Lu Y.                                   | Developing a risk assessment method for complex pipe jacking construction projects                                       | Automation in construction                            | 2015 | 10.1016/j.autcon.2015.07.011       |    | X  |    |
| Cheng M.-Y., Chang Y.-H., Korir D.                | Novel Approach to Estimating Schedule to Completion in Construction Projects Using Sequence and Nonsequence Learning     | Journal of construction engineering and management    | 2019 | 10.1061/(ASCE)CO.1943-7862.0001697 |    |    | X  |
| Cheng M.-Y., Hoang N.-D., Wu Y.-W.                | Cash flow prediction for construction project using a novel adaptive time-dependent least squares support vector machine | Journal of civil engineering and management           | 2015 | 10.3846/13923730.2014.893906       |    |    | X  |
| Cheng M.-Y., Huang K.-Y., Hutomo M.               | Multiobjective Dynamic-Guiding PSO for Optimizing Work Shift Schedules                                                   | Journal of construction engineering and management    | 2018 | 10.1061/(ASCE)CO.1943-7862.0001548 |    |    | X  |
| Cheng M.-Y., Lien L.-C., Huang C.-P., Huang C.-M. | Matrix organization process reengineering for construction firms                                                         | Journal of management in engineering                  | 2015 | 10.1061/(ASCE)ME.1943-5479.0000335 | X  |    | X  |
| Cheng M.-Y., Tran D.-H.                           | Opposition-based Multiple Objective Differential Evolution (OMODE) for optimizing work shift                             | Automation in construction                            | 2015 | 10.1016/j.autcon.2015.03.021       |    |    | X  |
| Cheng M.-Y., Tran D.-H., Hoang N.-D.              | Fuzzy clustering chaotic-based differential evolution for resource leveling in construction projects                     | Journal of civil engineering and management           | 2017 | 10.3846/13923730.2014.982699       |    |    | X  |
| Cheng Y., Yu W.-D., Li Q.                         | GA-based multi-level association rule mining approach for defect analysis in the construction industry                   | Automation in construction                            | 2015 | 10.1016/j.autcon.2014.12.016       |    |    | X  |
| Cheung S.O., Li K.                                | Biases in construction project dispute resolution                                                                        | Engineering construction and architectural management | 2019 | 10.1108/ECAM-03-2018-0109          |    |    | X  |

| Authors                                                            | Article Title                                                                                                                    | Source Title                                          | Year | DOI                                | C1 | C2 | C3 |
|--------------------------------------------------------------------|----------------------------------------------------------------------------------------------------------------------------------|-------------------------------------------------------|------|------------------------------------|----|----|----|
| Chi, B; Lu, WS; Ye, M; Bao, ZK; Zhang, XL                          | Construction waste minimization in green building: A comparative analysis of LEED-NC 2009 certified projects in the US           | Journal of cleaner production                         | 2020 | 10.1016/j.jclepro.2020.120749      |    |    | X  |
| Chi, HL; Wang, J; Wang, XY; Truijens, M; Yung, P                   | A Conceptual Framework of Quality-Assured Fabrication, Delivery and Installation Processes for Liquefied Natural Gas (LNG) Plant | Journal of intelligent and robotic systems            | 2015 | 10.1007/s10846-014-0123-9          |    | X  |    |
| Chih Y.-Y., Kiazad K., Li M., Capezio A., Zhou L., Restubog S.L.D. | Broken Promises: Implications for the Job Insecurity and Job Performance of Chinese                                              | Journal of construction engineering and management    | 2017 | 10.1061/(ASCE)CO.1943-7862.0001244 |    |    | X  |
| Chileshe N., Edwards D.J., Kavishe N., Haupt T.C.                  | Perception on challenges impacting bid decision of indigenous building contractors in Dar Es Salaam,                             | Journal of engineering design and technology          | 2020 | 10.1108/JEDT-10-2019-0280          |    | X  |    |
| Chileshe N., Njau C.W., Kibichii B.K., Macharia L.W., Kavishe N.   | Critical success factors for Public-Private Partnership (PPP) infrastructure and housing projects in Kenya                       | International journal of construction management      | 2020 | 10.1080/15623599.2020.1736835      |    |    | X  |
| Chileshe N., Rameezdeen R., Hosseini M.R.                          | Drivers for adopting reverse logistics in the construction industry: A qualitative study                                         | Engineering construction and architectural management | 2016 | 10.1108/ECAM-06-2014-0087          |    |    | X  |
| Chinowsky P.S., Javernick-Will A.                                  | High-value, collaborative networks                                                                                               | Construction management and economics                 | 2020 | 10.1080/01446193.2019.1607513      |    |    | X  |
| Chiu B.W.Y., Lai J.H.K.                                            | Project delay: key electrical construction factors in Hong Kong                                                                  | Journal of civil engineering and management           | 2017 | 10.3846/13923730.2017.1319410      |    |    | X  |

| Authors                                                | Article Title                                                                                                                                                                           | Source Title                                          | Year | DOI                                | C1 | C2 | C3 |
|--------------------------------------------------------|-----------------------------------------------------------------------------------------------------------------------------------------------------------------------------------------|-------------------------------------------------------|------|------------------------------------|----|----|----|
| Chiu, WYB; Lai, JHK                                    | Building information modelling for building services engineering: benefits, barriers and                                                                                                | Engineering construction and architectural management |      | 10.1108/ECAM-10-2018-0460          |    |    | X  |
| Cho K., Yoon Y.                                        | Decision Support Model for Determining Cost-Effective Renovation Time                                                                                                                   | Journal of management in engineering                  | 2016 | 10.1061/(ASCE)ME.1943-5479.0000418 |    |    | X  |
| Choe S., Leite F.                                      | Construction safety planning: Site-specific temporal and spatial information                                                                                                            | Automation in construction                            | 2017 | 10.1016/j.autcon.2017.09.007       | X  |    | X  |
| Choe S., Leite F.                                      | Assessing Safety Risk among Different Construction Trades: Quantitative                                                                                                                 | Journal of construction engineering and management    | 2017 | 10.1061/(ASCE)CO.1943-7862.0001237 |    | X  |    |
| Chofreh, AG; Goni, FA; Malik, MN; Khan, HH; Klemes, JJ | The imperative and research directions of sustainable project management                                                                                                                | Journal of cleaner production                         | 2019 | 10.1016/j.jclepro.2019.117810      |    |    | X  |
| Choi B., Ahn S., Lee S.                                | Construction Workers' Group Norms and Personal Standards Regarding Safety Behavior: Social Identity Theory Perspective                                                                  | Journal of management in engineering                  | 2017 | 10.1061/(ASCE)ME.1943-5479.0000511 |    |    | X  |
| Choi B., Ahn S., Lee S.H.                              | Role of Social Norms and Social Identifications in Safety Behavior of Construction Workers. II: Group Analyses for the Effects of Cultural Backgrounds and Organizational Structures on | Journal of construction engineering and management    | 2017 | 10.1061/(ASCE)CO.1943-7862.0001254 |    |    | X  |

| Authors                                            | Article Title                                                                                                                                    | Source Title                                       | Year | DOI                                | C1 | C2 | C3 |
|----------------------------------------------------|--------------------------------------------------------------------------------------------------------------------------------------------------|----------------------------------------------------|------|------------------------------------|----|----|----|
| Choi B., Ahn S., Lee S.H.                          | Role of Social Norms and Social Identifications in Safety Behavior of Construction Workers. I: Theoretical Model of Safety Behavior under Social | Journal of construction engineering and management | 2017 | 10.1061/(ASCE)CO.1943-7862.0001271 |    |    | X  |
| Choi B., Lee S.                                    | An Empirically Based Agent-Based Model of the Sociocognitive Process of Construction Workers' Safety Behavior                                    | Journal of construction engineering and management | 2018 | 10.1061/(ASCE)CO.1943-7862.0001421 |    |    | X  |
| Choi J., Yun S., Leite F., Mulva S.P.              | Team Integration and Owner Satisfaction: Comparing Integrated Project Delivery with Construction Management at Risk in                           | Journal of management in engineering               | 2019 | 10.1061/(ASCE)ME.1943-5479.0000654 |    |    | X  |
| Choi J.O., O'Connor J.T., Kim T.W.                 | Recipes for Cost and Schedule Successes in Industrial Modular Projects: Qualitative Comparative                                                  | Journal of construction engineering and management | 2016 | 10.1061/(ASCE)CO.1943-7862.0001171 |    | X  | X  |
| Choi J.O., O'Connor J.T., Kwak Y.H., Shrestha B.K. | Modularization Business Case Analysis Model for Industrial Projects                                                                              | Journal of management in engineering               | 2019 | 10.1061/(ASCE)ME.1943-5479.0000683 |    | X  |    |
| Choi J.O., Shrestha B.K., Kwak Y.H., Shane J.S.    | Innovative Technologies and Management Approaches for Facility Design Standardization and Modularization of Capital                              | Journal of management in engineering               | 2020 | 10.1061/(ASCE)ME.1943-5479.0000805 |    | X  | X  |
| Choi K., Lee H.W.                                  | Deconstructing the Construction Industry: A Spatiotemporal Clustering Approach to Profitability                                                  | Journal of construction engineering and management | 2016 | 10.1061/(ASCE)CO.1943-7862.0001165 |    | X  |    |

| Authors                                                      | Article Title                                                                                           | Source Title                                       | Year | DOI                                | C1 | C2 | C3 |
|--------------------------------------------------------------|---------------------------------------------------------------------------------------------------------|----------------------------------------------------|------|------------------------------------|----|----|----|
| Choi S., Cho I., Han S.H., Kwak Y.H., Chih Y.-Y.             | Dynamic Capabilities of Project-Based Organization in Global Operations                                 | Journal of management in engineering               | 2018 | 10.1061/(ASCE)ME.1943-5479.0000621 |    |    | X  |
| Choi Y.S., Lim I., Kim T., Cho H., Kang K.-I.                | Case study of the core structure succeeding method for tall building construction                       | Journal of construction engineering and management | 2016 | 10.1061/(ASCE)CO.1943-7862.0001197 |    |    | X  |
| Choi, J; Leite, F; de Oliveira, DP                           | BIM-based benchmarking system for healthcare projects: Feasibility study and functional requirements    | Automation in construction                         | 2018 | 10.1016/j.autcon.2018.09.015       |    |    | X  |
| Choi, JO; Bhatla, A; Stoppel, CM; Shane, JS                  | LEED Credit Review System and Optimization Model for Pursuing LEED Certification                        | Sustainability                                     | 2015 | 10.3390/su71013351                 |    |    | X  |
| Chong D., Wang Y., Zhao K., Wang D., Oeser M.                | Asphalt Fume Exposures by Pavement Construction Workers: Current Status and Project Cases               | Journal of construction engineering and management | 2018 | 10.1061/(ASCE)CO.1943-7862.0001454 |    |    | X  |
| Chong H.-Y., Fan S.-L., Sutrisna M., Hsieh S.-H., Tsai C.-M. | Preliminary contractual framework for BIM-enabled projects                                              | Journal of construction engineering and management | 2017 | 10.1061/(ASCE)CO.1943-7862.0001278 |    |    | X  |
| Chong H.-Y., Tan C.K., Munir O.                              | Revisiting U.K. Delay and disruption protocol: Distinguished features for contract drafting             | Journal of management in engineering               | 2015 | 10.1061/(ASCE)ME.1943-5479.0000299 |    |    | X  |
| Chou J.-S., Hsu S.-C., Lin C.-W., Chang Y.-C.                | Classifying influential for project information to discover rule sets for project disputes and possible | International journal of project management        | 2016 | 10.1016/j.ijproman.2016.10.001     |    |    | X  |
| Chou J.-S., Lin C.-W., Pham A.-D., Shao J.-Y.                | Optimized artificial intelligence models for predicting project award                                   | Automation in construction                         | 2015 | 10.1016/j.autcon.2015.02.006       |    |    | X  |
| Choudhari S., Tindwani A.                                    | Logistics optimisation in road construction project                                                     | Construction innovation                            | 2017 | 10.1108/CI-03-2016-0014            |    | X  |    |

| Authors                                                | Article Title                                                                                                          | Source Title                                       | Year | DOI                                | C1 | C2 | C3 |
|--------------------------------------------------------|------------------------------------------------------------------------------------------------------------------------|----------------------------------------------------|------|------------------------------------|----|----|----|
| Choudhry R.M.                                          | Achieving safety and productivity in construction projects                                                             | Journal of civil engineering and management        | 2017 | 10.3846/13923730.2015.1068842      |    |    | X  |
| Chrysafis K.A.,<br>Papadopoulos B.K.                   | Possibilistic moments for the task duration in fuzzy PERT                                                              | Journal of management in engineering               | 2015 | 10.1061/(ASCE)ME.1943-5479.0000296 |    |    | X  |
| Çıdık M.S., Boyd D.                                    | Shared sense of purposefulness: a new concept to understand the practice of coordinating                               | Construction management and economics              | 2020 | 10.1080/01446193.2019.1593471      |    |    | X  |
| Çınar S.                                               | Construction labour, subcontracting and masculinity: “construction is                                                  | Construction management and economics              | 2020 | 10.1080/01446193.2019.1690155      |    |    | X  |
| Ciribini A.L.C., Mastrolemb<br>Ventura S., Paneroni M. | Implementation of an interoperable process to optimise design and construction phases of a residential building: A BIM | Automation in construction                         | 2016 | 10.1016/j.autcon.2016.03.005       |    |    | X  |
| Clevenger C.M.                                         | Development of a Project Management Certification Plan for a DOT                                                       | Journal of management in engineering               | 2018 | 10.1061/(ASCE)ME.1943-5479.0000624 |    |    | X  |
| Colin J., Vanhoucke M.                                 | Empirical perspective on activity durations for project-management simulation                                          | Journal of construction engineering and management | 2016 | 10.1061/(ASCE)CO.1943-7862.0001022 |    |    | X  |
| Colin, J; Vanhoucke, M                                 | Developing a framework for statistical process control approaches in project management                                | International journal of project management        | 2015 | 10.1016/j.ijproman.2015.03.014     |    |    | X  |
| Collinge W.                                            | Stakeholder Engagement in Construction: Exploring Corporate Social Responsibility, Ethical                             | Journal of construction engineering and management | 2020 | 10.1061/(ASCE)CO.1943-7862.0001769 |    |    | X  |



| Authors                                                                        | Article Title                                                                                                                                                           | Source Title                                             | Year | DOI                                | C1 | C2 | C3 |
|--------------------------------------------------------------------------------|-------------------------------------------------------------------------------------------------------------------------------------------------------------------------|----------------------------------------------------------|------|------------------------------------|----|----|----|
| Collins W., Parrish K.,<br>Gibson G.E.                                         | Development of a Project<br>Scope Definition and<br>Assessment Tool for Small<br>Industrial Construction                                                                | Journal of management in<br>engineering                  | 2017 | 10.1061/(ASCE)ME.1943-5479.0000514 |    | X  | X  |
| Correia J.M., Sutrisna M.,<br>Zaman A.U.                                       | Factors influencing the<br>implementation of off-site<br>manufacturing in commercial<br>projects in Western<br>Australia: A proposed                                    | Journal of engineering design<br>and technology          | 2020 | 10.1108/JEDT-09-2019-0246          |    | X  |    |
| Cortes-Perez, JP; Cortes-<br>Perez, A; Prieto-Muriel, P                        | BIM-integrated management<br>of occupational hazards in<br>building construction and                                                                                    | Automation in construction                               | 2020 | 10.1016/j.autcon.2020.103115       |    | X  | X  |
| Costa F., Denis Granja A.,<br>Fregola A., Picchi F., Portioli<br>Staudacher A. | Understanding Relative<br>Importance of Barriers to<br>Improving the Customer-<br>Supplier Relationship within<br>Construction Supply Chains<br>Using DEMATEL Technique | Journal of management in<br>engineering                  | 2019 | 10.1061/(ASCE)ME.1943-5479.0000680 |    |    | X  |
| Cowen M., Hodgson D.                                                           | Damaged identities:<br>Examining identity regulation<br>and identity work of Gulf                                                                                       | International journal of<br>project management           | 2015 | 10.1016/j.ijproman.2015.06.009     |    |    | X  |
| Cruz C.O., Marques R.C.,<br>Pereira I.                                         | Alternative contractual<br>arrangements for urban light<br>rail systems: Lessons from<br>two case studies                                                               | Journal of construction<br>engineering and management    | 2015 | 10.1061/(ASCE)CO.1943-7862.0000942 |    |    | X  |
| Cui J., Li J., Xiao J., Yao J.,<br>Yang Z.                                     | Reclamation pathway of<br>waste piles: A case study in                                                                                                                  | Journal of cleaner production                            | 2020 | 10.1016/j.jclepro.2019.119919      |    |    | X  |
| Cui, ZP; Liu, JY; Xia, B;<br>Cheng, YX                                         | Beyond national culture<br>difference The role of<br>cultural intelligence in<br>cooperation within<br>international construction<br>joint ventures and insights        | Engineering construction and<br>architectural management | 2019 | 10.1108/ECAM-04-2018-0182          |    |    | X  |

| Authors                                               | Article Title                                                                                                    | Source Title                                          | Year | DOI                                | C1 | C2 | C3 |
|-------------------------------------------------------|------------------------------------------------------------------------------------------------------------------|-------------------------------------------------------|------|------------------------------------|----|----|----|
| Cuppen, E; Bosch-Rekveltdt, MGC; Pikaar, E; Mehos, DC | Stakeholder engagement in large-scale energy infrastructure projects: Revealing perspectives using Q methodology | International journal of project management           | 2016 | 10.1016/j.ijproman.2016.01.003     |    |    | X  |
| D’Incognito M., Costantino N., Migliaccio G.C.        | Actors and barriers to the adoption of LCC and LCA techniques in the built environment                           | Built environment project and asset management        | 2015 | 10.1108/BEPAM-12-2013-0068         |    |    | X  |
| da FONSECA F.B., Vanalle R.M., Camarotto J.A.         | Identification of ex-ante and ex-post transaction costs in industrial construction engineering projects          | Journal of civil engineering and management           | 2018 | 10.3846/jcem.2018.5199             |    |    | X  |
| da Rocha, CG; El Ghaz, HBC; Guadanhim, SJ             | A model for implementing product modularity in buildings design                                                  | Engineering construction and architectural management | 2020 | 10.1108/ECAM-02-2019-0096          |    |    | X  |
| da Rocha, CG; Kemmer, SL; Meneses, L                  | Managing Customization Strategies to Reduce Workflow Variations in House Building Projects                       | Journal of construction engineering and management    | 2016 | 10.1061/(ASCE)CO.1943-7862.0001119 |    |    | X  |
| Dabirian S., Abbaspour S., Khanzadi M., Ahmadi M.     | Dynamic modelling of human resource allocation in construction projects                                          | International journal of construction management      | 2019 | 10.1080/15623599.2019.1616411      |    |    | X  |
| Dagan D., Isaac S.                                    | Planning safe distances between workers on construction sites                                                    | Automation in construction                            | 2015 | 10.1016/j.autcon.2014.12.008       |    | X  | X  |
| Dahmas, S; Li, ZF; Liu, S                             | Solving the Difficulties and Challenges Facing Construction Based on Concurrent Engineering in                   | Sustainability                                        | 2019 | 10.3390/su11113146                 |    |    | X  |

| Authors                                                             | Article Title                                                                                            | Source Title                                          | Year | DOI                           | C1 | C2 | C3 |
|---------------------------------------------------------------------|----------------------------------------------------------------------------------------------------------|-------------------------------------------------------|------|-------------------------------|----|----|----|
| Dai, F; Zhu, ZH                                                     | Line Segment Grouping and Linking: A Key Step Toward Automated Photogrammetry for Non-Contact Site       | Journal of intelligent and robotic systems            | 2015 | 10.1007/s10846-014-0119-5     |    | X  |    |
| Dai, JQ; Xie, YC; Xu, JP; Lv, CW                                    | Environmentally friendly equilibrium strategy for coal distribution center site                          | Journal of cleaner production                         | 2020 | 10.1016/j.jclepro.2019.119017 |    |    | X  |
| Damoah I.S., Ayakwah A., Aryee K.J., Twum P.                        | The rise of PPPs in public sector affordable housing project delivery in Ghana: challenges and policy    | International journal of construction management      | 2020 | 10.1080/15623599.2020.1763897 |    |    | X  |
| Damoah I.S., Tingbani I., Kumi D.K., Akwei C.C., Amoako I.O.        | Factors influencing school building construction projects abandonment                                    | International journal of construction management      | 2019 | 10.1080/15623599.2019.1675025 |    |    | X  |
| Damoah, IS; Mouzugh, Y; Kumi, DK                                    | The effects of government construction projects abandonment: stakeholders' perspective                   | International journal of construction management      | 2020 | 10.1080/15623599.2018.1486172 |    |    | X  |
| Dang C.N., Le-Hoai L.                                               | Revisiting storey enclosure method for early estimation of structural building construction cost         | Engineering construction and architectural management | 2018 | 10.1108/ECAM-07-2015-0111     |    |    | X  |
| Dang C.N., Le-Hoai L., Kim S.-Y., Nguyen C.V., Lee Y.-D., Lee S.-H. | Identification of risk patterns in Vietnamese road and bridge construction: Contractor's perspective     | Built environment project and asset management        | 2017 | 10.1108/BEPAM-11-2015-0065    |    |    | X  |
| Dang C.N., Le-Hoai L., Peansupap V.                                 | Linking knowledge enabling factors to organizational performance: Empirical study of project-based firms | International journal of construction management      | 2019 | 10.1080/15623599.2019.1637097 |    |    | X  |

| Authors                                                        | Article Title                                                                                                         | Source Title                                          | Year | DOI                                | C1 | C2 | C3 |
|----------------------------------------------------------------|-----------------------------------------------------------------------------------------------------------------------|-------------------------------------------------------|------|------------------------------------|----|----|----|
| Daniel E.I., Pasquire C., Dickens G.                           | Development of Approach to Support Construction Stakeholders in Implementation of the Last                            | Journal of management in engineering                  | 2019 | 10.1061/(ASCE)ME.1943-5479.0000699 |    |    | X  |
| Daniel, E; Daniel, PA                                          | Megaprojects as complex adaptive systems: The Hinkley point C case                                                    | International journal of project management           | 2019 | 10.1016/j.ijproman.2019.05.001     |    |    | X  |
| Daniel, EI; Pasquire, C; Dickens, G; Ballard, HG               | The relationship between the last planner (R) system and collaborative planning practice in UK construction           | Engineering construction and architectural management | 2017 | 10.1108/ECAM-07-2015-0109          |    |    | X  |
| Dansoh A., Frimpong S., Oppong G.D.                            | Exploring the dimensions of traditional authority influencing stakeholder management at the pre-construction stage of | Construction management and economics                 | 2020 | 10.1080/01446193.2019.1589647      |    |    | X  |
| Dansoh, A; Frimpong, S; Ampratwum, G; Oppong, GD; Osei-Kyei, R | Exploring the role of traditional authorities in managing the public as stakeholders on PPP projects:                 | International journal of construction management      |      | 10.1080/15623599.2020.1725722      |    |    | X  |
| Dao B., Kermanshachi S., Shane J., Anderson S., Hare           | Exploring and Assessing Project Complexity                                                                            | Journal of construction engineering and management    | 2017 | 10.1061/(ASCE)CO.1943-7862.0001275 |    |    | X  |
| Das M., Cheng J.C.P., Law K.H.                                 | An ontology-based web service framework for construction supply chain collaboration and                               | Engineering construction and architectural management | 2015 | 10.1108/ECAM-07-2014-0089          |    |    | X  |
| Das M., Luo H., Cheng J.C.P.                                   | Securing interim payments in construction projects through a blockchain-based                                         | Automation in construction                            | 2020 | 10.1016/j.autcon.2020.103284       |    |    | X  |

| Authors                                                          | Article Title                                                                                                                                         | Source Title                                             | Year | DOI                                | C1 | C2 | C3 |
|------------------------------------------------------------------|-------------------------------------------------------------------------------------------------------------------------------------------------------|----------------------------------------------------------|------|------------------------------------|----|----|----|
| Dasovic, B; Galic, M;<br>Klansek, U                              | A Survey on Integration of<br>Optimization and Project<br>Management Tools for<br>Sustainable Construction<br>Scheduling                              | Sustainability                                           | 2020 | 10.3390/su12083405                 |    |    | X  |
| Dave B., Kubler S., Främling<br>K., Koskela L.                   | Opportunities for enhanced<br>lean construction<br>management using Internet of                                                                       | Automation in construction                               | 2016 | 10.1016/j.autcon.2015.10.009       | X  |    | X  |
| Davies K., McMeel D.J.,<br>Wilkinson S.                          | Making friends with<br>Frankenstein: Hybrid practice<br>in BIM                                                                                        | Engineering construction and<br>architectural management | 2017 | 10.1108/ECAM-04-2015-0061          |    |    | X  |
| Davis, PR; Jefferies, M; Ke,<br>YJ                               | Psychological Contracts:<br>Framework for Relationships<br>in Construction Procurement                                                                | Journal of construction<br>engineering and management    | 2017 | 10.1061/(ASCE)CO.1943-7862.0001327 |    |    | X  |
| Davoudabadi, R; Mousavi,<br>SM; Saparauskas, J;<br>Gitinavard, H | SOLVING<br>CONSTRUCTION<br>PROJECT SELECTION<br>PROBLEM BY A NEW<br>UNCERTAIN WEIGHTING<br>AND RANKING BASED<br>ON COMPROMISE<br>SOLUTION WITH LINEAR | Journal of civil engineering<br>and management           | 2019 | 10.3846/jcem.2019.8656             |    |    | X  |
| De Almeida N.M., Sousa V.,<br>Alves Dias L., Branco F.A.         | Managing the technical risk<br>of performance-based<br>building structures                                                                            | Journal of civil engineering<br>and management           | 2015 | 10.3846/13923730.2014.893921       |    |    | X  |
| de Andrade P.A., Martens A.,<br>Vanhoucke M.                     | Using real project schedule<br>data to compare earned<br>schedule and earned duration<br>management project time<br>forecasting capabilities          | Automation in construction                               | 2019 | 10.1016/j.autcon.2018.11.030       |    |    | X  |

| Authors                                                                    | Article Title                                                                                                        | Source Title                                             | Year | DOI                                | C1 | C2 | C3 |
|----------------------------------------------------------------------------|----------------------------------------------------------------------------------------------------------------------|----------------------------------------------------------|------|------------------------------------|----|----|----|
| De Athayde Prata B.,<br>Pitombeira-Neto A.R., De<br>Moraes Sales C.J.      | An Integer Linear<br>Programming Model for the<br>Multiperiod Production<br>Planning of Precast Concrete             | Journal of construction<br>engineering and management    | 2015 | 10.1061/(ASCE)CO.1943-7862.0000991 |    | X  |    |
| de Carvalho, MM; Patah, LA;<br>Bido, DD                                    | Project management and its<br>effects on project success:<br>Cross-country and cross-<br>industry comparisons        | International journal of<br>project management           | 2015 | 10.1016/j.ijproman.2015.04.004     |    |    | X  |
| de Jong, M                                                                 | From Eco-Civilization to City<br>Branding: A Neo-Marxist<br>Perspective of Sustainable<br>Urbanization in China      | Sustainability                                           | 2019 | 10.3390/su11205608                 |    |    | X  |
| De Marco A., Rafele C.,<br>Thaheem M.J.                                    | Dynamic management of risk<br>contingency in complex<br>design-build projects                                        | Journal of construction<br>engineering and management    | 2016 | 10.1061/(ASCE)CO.1943-7862.0001052 |    |    | X  |
| de Melo, RRS; Costa, DB                                                    | Integrating resilience<br>engineering and UAS<br>technology into construction<br>safety planning and control         | Engineering construction and<br>architectural management | 2019 | 10.1108/ECAM-12-2018-0541          |    |    | X  |
| de Paula, N; Arditi, D;<br>Melhado, S                                      | Managing sustainability<br>efforts in building design,<br>construction, consulting, and<br>facility management firms | Engineering construction and<br>architectural management | 2017 | 10.1108/ECAM-07-2016-0165          |    |    | X  |
| De Silva N., Weerasinghe<br>R.P.N.P., Madhusanka<br>H.W.N., Kumaraswamy M. | Relationally integrated value<br>networks (RIVANS) for total<br>facilities management (TFM)                          | Built environment project<br>and asset management        | 2017 | 10.1108/BEPAM-08-2016-0037         |    |    | X  |
| de Soto, BG; Adey, BT;<br>Fernando, D                                      | A hybrid methodology to<br>estimate construction<br>material quantities at an early<br>project phase                 | International journal of<br>construction management      | 2017 | 10.1080/15623599.2016.1176727      |    | X  |    |
| de Soto, BG; Agusti-Juan, I;<br>Joss, S; Hunheviz, J                       | Implications of Construction<br>4.0 to the workforce and<br>organizational structures                                | International journal of<br>construction management      |      | 10.1080/15623599.2019.1616414      |    | X  |    |

| Authors                                                             | Article Title                                                                                                                  | Source Title                                                 | Year | DOI                                | C1 | C2 | C3 |
|---------------------------------------------------------------------|--------------------------------------------------------------------------------------------------------------------------------|--------------------------------------------------------------|------|------------------------------------|----|----|----|
| de Valence G., Runeson G.                                           | Graham Ive and the methodology of construction economics                                                                       | Construction management and economics                        | 2015 | 10.1080/01446193.2015.1021702      |    | X  |    |
| Debs L., Shaurette M.                                               | An Exploration of Telephone and E-Mail Communications for Design-Related Construction Problems                                 | International journal of construction education and research | 2020 | 10.1080/15578771.2020.1713934      | X  |    |    |
| Deepak, M; Mahesh, G                                                | Developing a knowledge-based safety culture instrument for construction industry Reliability and validity assessment in Indian | Engineering construction and architectural management        | 2019 | 10.1108/ECAM-09-2018-0383          |    |    | X  |
| Dehghan R., Hazini K., Ruwanpura J.                                 | Optimization of overlapping activities in the design phase of construction projects                                            | Automation in construction                                   | 2015 | 10.1016/j.autcon.2015.08.004       |    |    | X  |
| Del Solar P., Del Río M., Villoria P., Nadal A.                     | Analysis of Recurrent Defects in the Execution of Ceramic-Coatings Cladding in Building Construction                           | Journal of construction engineering and management           | 2016 | 10.1061/(ASCE)CO.1943-7862.0001075 |    |    | X  |
| Delgado, JMD; Oyedele, L; Beach, T; Demian, P                       | Augmented and Virtual Reality in Construction: Drivers and Limitations for Industry Adoption                                   | Journal of construction engineering and management           | 2020 | 10.1061/(ASCE)CO.1943-7862.0001844 |    | X  | X  |
| Delgado, JMD; Oyedele, L; Bilal, M; Ajayi, A; Akanbi, L; Akinade, O | Big Data Analytics System for Costing Power Transmission Projects                                                              | Journal of construction engineering and management           | 2020 | 10.1061/(ASCE)CO.1943-7862.0001745 | X  |    | X  |
| Delgado-Hernandez D.J., Cruz-Cruz C.C., Vences-García P.Y.          | Improvement Management Tools in the Construction Industry: Case Study of                                                       | Journal of construction engineering and management           | 2017 | 10.1061/(ASCE)CO.1943-7862.0001229 |    |    | X  |
| Demirel, HC; Leendertse, W; Volker, L; Hertogh, M                   | Flexibility in PPP contracts - Dealing with potential change in the pre-contract phase of a construction                       | Construction management and economics                        | 2017 | 10.1080/01446193.2016.1241414      |    |    | X  |

| Authors                                              | Article Title                                                                                                                | Source Title                                          | Year | DOI                                | C1 | C2 | C3 |
|------------------------------------------------------|------------------------------------------------------------------------------------------------------------------------------|-------------------------------------------------------|------|------------------------------------|----|----|----|
| Demirkesen S., Arditi D.                             | Construction safety personnel's perceptions of safety training practices                                                     | International journal of project management           | 2015 | 10.1016/j.ijproman.2015.01.007     |    |    | X  |
| Demirkesen S., Ozorhon B.                            | Impact of integration management on construction project management performance                                              | International journal of project management           | 2017 | 10.1016/j.ijproman.2017.09.008     |    |    | X  |
| Deng H., Hong H., Luo D., Deng Y., Su C.             | Automatic Indoor Construction Process Monitoring for Tiles Based on BIM and Computer Vision                                  | Journal of construction engineering and management    | 2020 | 10.1061/(ASCE)CO.1943-7862.0001744 |    |    | X  |
| Deng X., Low S.P., Zhao X., Chang T.                 | Identifying micro variables contributing to political risks in international construction projects                           | Engineering construction and architectural management | 2018 | 10.1108/ECAM-02-2017-0042          |    |    | X  |
| Deng Y., Gan V.J.L., Das M., Cheng J.C.P., Anumba C. | Integrating 4D BIM and GIS for Construction Supply Chain Management                                                          | Journal of construction engineering and management    | 2019 | 10.1061/(ASCE)CO.1943-7862.0001633 |    |    | X  |
| Deng, C; Wang, WG                                    | Runoff Predicting and Variation Analysis in Upper Ganjiang Basin under Projected Climate Changes                             | Sustainability                                        | 2019 | 10.3390/su11215885                 |    |    | X  |
| Dericks G.H., Phua F.T.T.                            | The occupational attractiveness of the built environment and the roles of individualism and collectivism: a hidden source    | Construction management and economics                 | 2020 | 10.1080/01446193.2020.1757732      |    |    | X  |
| Di Maddaloni F., Davis K.                            | The influence of local community stakeholders in megaprojects: Rethinking their inclusiveness to improve project performance | International journal of project management           | 2017 | 10.1016/j.ijproman.2017.08.011     |    |    | X  |



| Authors                                                   | Article Title                                                                                                                                      | Source Title                                | Year | DOI                                | C1 | C2 | C3 |
|-----------------------------------------------------------|----------------------------------------------------------------------------------------------------------------------------------------------------|---------------------------------------------|------|------------------------------------|----|----|----|
| Di Maddaloni F., Davis K.                                 | Project manager's perception of the local communities' stakeholder in megaprojects. An empirical investigation in the UK                           | International journal of project management | 2018 | 10.1016/j.ijproman.2017.11.003     |    |    | X  |
| Diaz-Hernandez G., Losada I.J., Mendez F.J.               | Improving construction management of port infrastructures using an advanced computer-based system                                                  | Automation in construction                  | 2017 | 10.1016/j.autcon.2017.06.020       |    |    | X  |
| Didehvar N., Teymourifard M., Mojtahedi M., Sepasgozar S. | An investigation on Virtual Information Modeling acceptance based on project management knowledge areas                                            | Buildings                                   | 2018 | 10.3390/buildings8060080           | X  |    |    |
| Dikmen, I; Budayan, C; Birgonul, MT; Hayat, E             | Effects of Risk Attitude and Controllability Assumption on Risk Ratings: Observational Study on International Construction Project Risk Assessment | Journal of management in engineering        | 2018 | 10.1061/(ASCE)ME.1943-5479.0000643 |    |    | X  |
| Ding L., Li K., Zhou Y., Love P.E.D.                      | An IFC-inspection process model for infrastructure projects: Enabling real-time quality monitoring and                                             | Automation in construction                  | 2017 | 10.1016/j.autcon.2017.08.029       |    | X  | X  |
| Ding Z., Liu S., Liao L., Zhang L.                        | A digital construction framework integrating building information modeling and reverse engineering technologies for renovation projects            | Automation in construction                  | 2019 | 10.1016/j.autcon.2019.02.012       |    |    | X  |

| Authors                                         | Article Title                                                                                                                                         | Source Title                                          | Year | DOI                                | C1 | C2 | C3 |
|-------------------------------------------------|-------------------------------------------------------------------------------------------------------------------------------------------------------|-------------------------------------------------------|------|------------------------------------|----|----|----|
| Ding Z., Liu S., Luo L., Liao L.                | A building information modeling-based carbon emission measurement system for prefabricated residential buildings during the materialization phase     | Journal of cleaner production                         | 2020 | 10.1016/j.jclepro.2020.121728      |    |    | X  |
| Ding Z., Zhu M., Tam V.W.Y., Yi G., Tran C.N.N. | A system dynamics-based environmental benefit assessment model of construction waste reduction management at the design and construction stages       | Journal of cleaner production                         | 2018 | 10.1016/j.jclepro.2017.12.101      |    |    | X  |
| Ding Z., Zuo J., Wu J., Wang J.Y.               | Key factors for the BIM adoption by architects: A China study                                                                                         | Engineering construction and architectural management | 2015 | 10.1108/ECAM-04-2015-0053          |    |    | X  |
| Ding, ZK; Gong, WY; Tam, VWY; Illankoon, IMCS   | Conceptual framework for renovation waste management based on renovation waste generation rates in residential buildings: An empirical study in China | Journal of cleaner production                         | 2019 | 10.1016/j.jclepro.2019.04.153      |    |    | X  |
| Dixit V.                                        | Risk assessment of different sourcing contract scenarios in project procurement                                                                       | International journal of construction management      | 2020 | 10.1080/15623599.2020.1728610      |    |    | X  |
| Dixit V., Chaudhuri A., Srivastava R.K.         | Procurement scheduling in engineer procure construct projects: a comparison of three fuzzy modelling                                                  | International journal of construction management      | 2018 | 10.1080/15623599.2017.1314750      |    |    | X  |
| Doan D.T., Chinda T.                            | Modeling construction and demolition waste recycling program in Bangkok: Benefit and cost analysis                                                    | Journal of construction engineering and management    | 2016 | 10.1061/(ASCE)CO.1943-7862.0001188 |    |    | X  |

| Authors                                                                         | Article Title                                                                                                                                     | Source Title                                       | Year | DOI                                | C1 | C2 | C3 |
|---------------------------------------------------------------------------------|---------------------------------------------------------------------------------------------------------------------------------------------------|----------------------------------------------------|------|------------------------------------|----|----|----|
| Dobrovolskiene, N;<br>Tamosiuniene, R                                           | An Index to Measure Sustainability of a Business Project in the Construction Industry: Lithuanian Case                                            | Sustainability                                     | 2016 | 10.3390/su8010014                  |    |    | X  |
| Dobrovolskiene, N;<br>Tamosiuniene, R                                           | Sustainability-Oriented Financial Resource Allocation in a Project Portfolio through Multi-                                                       | Sustainability                                     | 2016 | 10.3390/su8050485                  |    |    | X  |
| D'Oca S., Ferrante A., Ferrer C., Pernetti R., Gralka A., Sebastian R., Veld P. | Technical, financial, and social barriers and challenges in deep building renovation: Integration of lessons learned from the H2020 cluster       | Buildings                                          | 2018 | 10.3390/buildings8120174           | X  |    |    |
| Dogan S.Z., Arditi D., Gunhan S., Erbasaranoglu B.                              | Assessing coordination performance based on centrality in an e-mail communication network                                                         | Journal of management in engineering               | 2015 | 10.1061/(ASCE)ME.1943-5479.0000255 |    |    | X  |
| Dolla T., Laishram B.S.                                                         | Procurement of low carbon municipal solid waste infrastructure in India through public-private                                                    | Built environment project and asset management     | 2018 | 10.1108/BEPAM-10-2017-0087         |    |    | X  |
| Doloi H.                                                                        | Community-Centric Model for Evaluating Social Value in Projects                                                                                   | Journal of construction engineering and management | 2018 | 10.1061/(ASCE)CO.1943-7862.0001473 |    |    | X  |
| Domenech T., Bleischwitz R., Doranova A., Panayotopoulos D., Roman L.           | Mapping Industrial Symbiosis Development in Europe_ typologies of networks, characteristics, performance and contribution to the Circular Economy | Resources, conservation and recycling              | 2019 | 10.1016/j.resconrec.2018.09.016    |    | X  |    |

| Authors                                                                 | Article Title                                                                                                                               | Source Title                                          | Year | DOI                                | C1 | C2 | C3 |
|-------------------------------------------------------------------------|---------------------------------------------------------------------------------------------------------------------------------------------|-------------------------------------------------------|------|------------------------------------|----|----|----|
| Dong C., Wang F., Li H.,<br>Ding L., Luo H.                             | Knowledge dynamics-<br>integrated map as a blueprint<br>for system development:<br>Applications to safety risk<br>management in Wuhan metro | Automation in construction                            | 2018 | 10.1016/j.autcon.2018.05.014       |    |    | X  |
| Dong, N; Fu, YT; Xiong, F;<br>Li, LJ; Ao, YB; Martek, I                 | Sustainable Construction<br>Project Management (SCPM)<br>Evaluation-A Case Study of<br>the Guangzhou Metro Line-7,<br>PR China              | Sustainability                                        | 2019 | 10.3390/su11205731                 |    |    | X  |
| Dong, YP; Xu, JL; Liu, XL;<br>Gao, C; Ru, H; Duan, ZH                   | Carbon Emissions and<br>Expressway Traffic Flow<br>Patterns in China                                                                        | Sustainability                                        | 2019 | 10.3390/su11102824                 |    |    | X  |
| Dossick, CS; Anderson, A;<br>Azari, R; Iorio, J; Neff, G;<br>Taylor, JE | Messy Talk in Virtual Teams:<br>Achieving Knowledge<br>Synthesis through Shared                                                             | Journal of management in<br>engineering               | 2015 | 10.1061/(ASCE)ME.1943-5479.0000301 | X  |    |    |
| Dowsett, RM; Harty, CF                                                  | Assessing the implementation<br>of BIM - an information<br>systems approach                                                                 | Construction management<br>and economics              | 2019 | 10.1080/01446193.2018.1476728      |    | X  | X  |
| Du G., Pettersson L.,<br>Karoumi R.                                     | Soil-steel composite bridge:<br>An alternative design<br>solution for short spans                                                           | Journal of cleaner production                         | 2018 | 10.1016/j.jclepro.2018.04.097      |    |    | X  |
| Du J., El-Gafy M.                                                       | Using agent-based modeling<br>to investigate goal<br>incongruence issues in<br>proposal development: Case                                   | Journal of management in<br>engineering               | 2015 | 10.1061/(ASCE)ME.1943-5479.0000343 |    |    | X  |
| Du J., El-Gafy M., Zhao D.                                              | Optimization of Change<br>Order Management Process<br>with Object-Oriented<br>Discrete Event Simulation:                                    | Journal of construction<br>engineering and management | 2016 | 10.1061/(ASCE)CO.1943-7862.0001092 |    |    | X  |

| Authors                                                              | Article Title                                                                                                                   | Source Title                                          | Year | DOI                                | C1 | C2 | C3 |
|----------------------------------------------------------------------|---------------------------------------------------------------------------------------------------------------------------------|-------------------------------------------------------|------|------------------------------------|----|----|----|
| Du J., Jing H., Castro-Lacouture D., Sugumaran V.                    | Multi-agent simulation for managing design changes in prefabricated construction projects                                       | Engineering construction and architectural management | 2019 | 10.1108/ECAM-11-2018-0524          |    |    | X  |
| Du J., Shi Y., Zou Z., Zhao D.                                       | CoVR: Cloud-Based Multiuser Virtual Reality Headset System for Project Communication of Remote                                  | Journal of construction engineering and management    | 2018 | 10.1061/(ASCE)CO.1943-7862.0001426 | X  |    | X  |
| Du L., Tang W., Liu C., Wang S., Wang T., Shen W., Huang M., Zhou Y. | Enhancing engineer-procure-construct project performance by partnering in international markets: Perspective from Chinese       | International journal of project management           | 2016 | 10.1016/j.ijproman.2015.09.003     |    |    | X  |
| Du, J; Wang, Q; Shi, Q                                               | Description-experience gap under imperfect information Information continuum and aggressive cost estimating in capital projects | Engineering construction and architectural management | 2019 | 10.1108/ECAM-02-2018-0075          |    | X  | X  |
| Du, LJ; Xu, L; Li, YP; Liu, CS; Li, ZH; Wong, JS; Lei, B             | China's Agricultural Irrigation and Water Conservancy Projects: A Policy Synthesis and                                          | Sustainability                                        | 2019 | 10.3390/su11247027                 |    |    | X  |
| Duncheva T., Bradley F.F.                                            | Multifaceted Productivity Comparison of Off-Site Timber Manufacturing Strategies in Mainland Europe and the United              | Journal of construction engineering and management    | 2019 | 10.1061/(ASCE)CO.1943-7862.0001641 |    | X  | X  |
| Durdyev S., Hosseini M.R., Martek I., Ismail S., Arashpour M.        | Barriers to the use of integrated project delivery (IPD): a quantified model for                                                | Engineering construction and architectural management | 2019 | 10.1108/ECAM-12-2018-0535          |    |    | X  |

| Authors                                                         | Article Title                                                                                    | Source Title                                          | Year | DOI                                | C1 | C2 | C3 |
|-----------------------------------------------------------------|--------------------------------------------------------------------------------------------------|-------------------------------------------------------|------|------------------------------------|----|----|----|
| Durdyev S., Mbachu J.                                           | Key constraints to labour productivity in residential building projects: evidence from Cambodia  | International journal of construction management      | 2018 | 10.1080/15623599.2017.1326301      |    |    | X  |
| Durdyev, S; Ismail, S; Kandymov, N                              | Structural Equation Model of the Factors Affecting Construction Labor                            | Journal of construction engineering and management    | 2018 | 10.1061/(ASCE)CO.1943-7862.0001452 |    |    | X  |
| Durdyev, S; Zavadskas, EK; Thurnell, D; Banaitis, A; Ihtiyar, A | Sustainable Construction Industry in Cambodia: Awareness, Drivers and Barriers                   | Sustainability                                        | 2018 | 10.3390/su10020392                 |    |    | X  |
| Duryan M., Smyth H.                                             | Service design and knowledge management in the construction supply chain for an infrastructure   | Built environment project and asset management        | 2019 | 10.1108/BEPAM-04-2018-0060         |    |    | X  |
| Dzeng R.-J., Wang P.-R.                                         | C-Negotiation Game: An educational game model for construction procurement and negotiation       | Automation in construction                            | 2017 | 10.1016/j.autcon.2016.11.010       |    |    | X  |
| Eadie R., Browne M., Odeyinka H., Mc keown C., Mc niff S.       | A survey of current status of and perceived changes required for BIM adoption in                 | Built environment project and asset management        | 2015 | 10.1108/BEPAM-07-2013-0023         |    |    | X  |
| Edirisinghe R., London K.A., Kalutara P., Aranda-Mena G.        | Building information modelling for facility management: Are we there                             | Engineering construction and architectural management | 2017 | 10.1108/ECAM-06-2016-0139          |    |    | X  |
| Ejohwomu O.A., Oshodi O.S., Lam K.C.                            | Nigeria's construction industry: Barriers to effective communication                             | Engineering construction and architectural management | 2017 | 10.1108/ECAM-01-2016-0003          | X  |    | X  |
| Eke G., Elgy J., Wedawatta G.                                   | Establishing a Link between Contractor Selection Strategy and Project Outcomes: Simulation Study | Journal of construction engineering and management    | 2019 | 10.1061/(ASCE)CO.1943-7862.0001703 |    |    | X  |

| Authors                                                                | Article Title                                                                                                                                      | Source Title                                                 | Year | DOI                                | C1 | C2 | C3 |
|------------------------------------------------------------------------|----------------------------------------------------------------------------------------------------------------------------------------------------|--------------------------------------------------------------|------|------------------------------------|----|----|----|
| Eken G., Bilgin G., Dikmen I., Birgonul M.T.                           | A lessons-learned tool for organizational learning in construction                                                                                 | Automation in construction                                   | 2020 | 10.1016/j.autcon.2019.102977       |    |    | X  |
| Ekeskar, A; Rudberg, M                                                 | Third-party logistics in construction: the case of a large hospital project                                                                        | Construction management and economics                        | 2016 | 10.1080/01446193.2016.1186809      |    | X  | X  |
| El Asmar M., Hanna A.S., Loh W.-Y.                                     | Evaluating integrated project delivery using the project quarterback rating                                                                        | Journal of construction engineering and management           | 2016 | 10.1061/(ASCE)CO.1943-7862.0001015 |    |    | X  |
| El Debs L.C., Brunese P.S., Shaurette M.                               | Use of Concept Maps to Illustrate Barriers to Construction Industry Inter-Organizational Communication: a Comparative View from                    | International journal of construction education and research | 2018 | 10.1080/15578771.2016.1226214      | X  |    |    |
| El-Abbasy, MS; Elazouni, A; Zayed, T                                   | MOSCOPEA: Multi-objective construction scheduling optimization using elitist non-dominated sorting genetic algorithm                               | Automation in construction                                   | 2016 | 10.1016/j.autcon.2016.08.038       |    | X  | X  |
| El-Adaway I.H., Abotaleb I.S., Eid M.S., May S., Netherton L., Vest J. | Contract Administration Guidelines for Public Infrastructure Projects in the United States and Saudi Arabia: Comparative Analysis Approach         | Journal of construction engineering and management           | 2018 | 10.1061/(ASCE)CO.1943-7862.0001472 |    |    | X  |
| El-Adaway I.H., Ali G., Assaad R., Elsayegh A., Abotaleb I.S.          | Analytic Overview of Citation Metrics in the Civil Engineering Domain with Focus on Construction Engineering and Management Specialty Area and Its | Journal of construction engineering and management           | 2019 | 10.1061/(ASCE)CO.1943-7862.0001705 |    |    | X  |

| Authors                                                                      | Article Title                                                                                         | Source Title                                          | Year | DOI                                | C1 | C2 | C3 |
|------------------------------------------------------------------------------|-------------------------------------------------------------------------------------------------------|-------------------------------------------------------|------|------------------------------------|----|----|----|
| Elbarkouky M.M.G., Fayek A.R., Siraj N.B., Sadeghi N.                        | Fuzzy arithmetic risk analysis approach to determine construction project                             | Journal of construction engineering and management    | 2016 | 10.1061/(ASCE)CO.1943-7862.0001191 |    |    | X  |
| Elbeltagi E., Ammar M., Sanad H., Kassab M.                                  | Overall multiobjective optimization of construction projects scheduling using particle swarm          | Engineering construction and architectural management | 2016 | 10.1108/ECAM-11-2014-0135          |    |    | X  |
| El-Diraby, T; Krijnen, T; Papagelis, M                                       | BIM-based collaborative design and socio-technical analytics of green buildings                       | Automation in construction                            | 2017 | 10.1016/j.autcon.2017.06.004       | X  |    |    |
| Elghaish F., Abrishami S.                                                    | Developing a framework to revolutionise the 4D BIM process: IPD-based solution                        | Construction innovation                               | 2020 | 10.1108/CI-11-2019-0127            |    | X  |    |
| Elghaish F., Abrishami S., Abu Samra S., Gaterell M., Hosseini M.R., Wise R. | Cash flow system development framework within integrated project delivery (IPD) using BIM             | International journal of construction management      | 2019 | 10.1080/15623599.2019.1573477      |    |    | X  |
| Elghaish F., Abrishami S., Hosseini M.R.                                     | Integrated project delivery with blockchain: An automated financial system                            | Automation in construction                            | 2020 | 10.1016/j.autcon.2020.103182       |    |    | X  |
| Elghaish F., Abrishami S., Hosseini M.R., Abu-Samra S., Gaterell M.          | Integrated project delivery with BIM: An automated EVM-based approach                                 | Automation in construction                            | 2019 | 10.1016/j.autcon.2019.102907       |    |    | X  |
| Elghaish, F; Abrishami, S                                                    | A centralised cost management system: exploiting EVM and ABC                                          | Engineering construction and architectural management |      | 10.1108/ECAM-11-2019-0623          |    |    | X  |
| El-Gohary K.M., Aziz R.F., Abdel-Khalek H.A.                                 | Engineering Approach Using ANN to Improve and Predict Construction Labor Productivity under Different | Journal of construction engineering and management    | 2017 | 10.1061/(ASCE)CO.1943-7862.0001340 |    |    | X  |



| Authors                                                     | Article Title                                                                                                              | Source Title                                          | Year | DOI                           | C1 | C2 | C3 |
|-------------------------------------------------------------|----------------------------------------------------------------------------------------------------------------------------|-------------------------------------------------------|------|-------------------------------|----|----|----|
| El-Hamrawy, SAK; Abu El-Maaty, AE; Akal, AY                 | Proposed models to measure the quality of highway projects Regression analysis vs statistical - fuzzy approach             | Engineering construction and architectural management | 2017 | 10.1108/ECAM-06-2016-0134     |    |    | X  |
| El-Kholy A.M.                                               | A new technique for subcontractor selection by adopting choosing by advantages                                             | International journal of construction management      | 2019 | 10.1080/15623599.2019.1683694 |    |    | X  |
| El-Kholy, AM; Tahwia, AM; Elsayed, MM                       | Prediction of simulated cost contingency for steel reinforcement in building projects: ANN versus regression-based models  | International journal of construction management      |      | 10.1080/15623599.2020.1741492 |    |    | X  |
| ElNimr A., Fagiar M., Mohamed Y.                            | Two-way integration of 3D visualization and discrete event simulation for modeling mobile crane movement under dynamically | Automation in construction                            | 2016 | 10.1016/j.autcon.2016.05.013  |    | X  | X  |
| El-Sawalhi N.I., Hammad S.                                  | Factors affecting stakeholder management in construction projects in the Gaza Strip                                        | International journal of construction management      | 2015 | 10.1080/15623599.2015.1035626 |    |    | X  |
| El-Sayegh S.                                                | Resource levelling optimization model considering float loss impact                                                        | Engineering construction and architectural management | 2018 | 10.1108/ECAM-10-2016-0229     |    |    | X  |
| El-Sayegh S.M., AbdRaboh T., Elian D., ElJarad N., Ahmad Y. | Developing a bi-parameter bidding model integrating price and sustainable construction practices                           | International journal of construction management      | 2020 | 10.1080/15623599.2020.1768625 |    |    | X  |
| El-Sayegh S.M., Basamji M., Haj Ahmad A., Zarif N.          | Key contractor selection criteria for green construction projects in the UAE                                               | International journal of construction management      | 2019 | 10.1080/15623599.2019.1610545 |    |    | X  |

| Authors                                                             | Article Title                                                                                                                                    | Source Title                                       | Year | DOI                                | C1 | C2 | C3 |
|---------------------------------------------------------------------|--------------------------------------------------------------------------------------------------------------------------------------------------|----------------------------------------------------|------|------------------------------------|----|----|----|
| El-Sayegh S.M., Mansour M.H.                                        | Risk assessment and allocation in highway construction projects in the                                                                           | Journal of management in engineering               | 2015 | 10.1061/(ASCE)ME.1943-5479.0000365 |    |    | X  |
| Elzomor M., Burke R., Parrish K., Gibson E.                         | Front-End Planning for Large and Small Infrastructure Projects: Comparison of Project Definition Rating                                          | Journal of management in engineering               | 2018 | 10.1061/(ASCE)ME.1943-5479.0000611 |    |    | X  |
| Engebø A., Lædre O., Young B., Larssen P.F., Lohne J., Klakegg O.J. | Collaborative project delivery methods: A scoping review                                                                                         | Journal of civil engineering and management        | 2020 | 10.3846/jcem.2020.12186            |    |    | X  |
| Enshassi A., Saleh N., Mohamed S.                                   | Barriers to the application of lean construction techniques concerning safety improvement in construction                                        | International journal of construction management   | 2019 | 10.1080/15623599.2019.1602583      |    |    | X  |
| Enshassi M.S.A., Walbridge S., West J.S., Haas C.T.                 | Dynamic and Proactive Risk-Based Methodology for Managing Excessive Geometric Variability Issues in Modular Construction Projects Using Bayesian | Journal of construction engineering and management | 2020 | 10.1061/(ASCE)CO.1943-7862.0001747 |    |    | X  |
| Enshassi M.S.A., Walbridge S., West J.S., Haas C.T.                 | Integrated Risk Management Framework for Tolerance-Based Mitigation Strategy Decision Support in Modular Construction Projects                   | Journal of management in engineering               | 2019 | 10.1061/(ASCE)ME.1943-5479.0000698 |    |    | X  |
| Erdogan, SA; Saparauskas, J; Turskis, Z                             | A Multi-Criteria Decision-Making Model to Choose the Best Option for Sustainable Construction Management                                         | Sustainability                                     | 2019 | 10.3390/su11082239                 |    |    | X  |

| Authors                                               | Article Title                                                                                                                    | Source Title                                       | Year | DOI                                | C1 | C2 | C3 |
|-------------------------------------------------------|----------------------------------------------------------------------------------------------------------------------------------|----------------------------------------------------|------|------------------------------------|----|----|----|
| Eriksson, PE; Larsson, J; Pesamaa, O                  | Managing complex projects in the infrastructure sector - A structural equation model for flexibility-focused project management  | International journal of project management        | 2017 | 10.1016/j.ijproman.2017.08.015     |    |    | X  |
| Erol H., Dikmen I., Birgonul M.T.                     | Measuring the impact of lean construction practices on project duration and variability: A simulation-based study on residential | Journal of civil engineering and management        | 2017 | 10.3846/13923730.2015.1068846      |    |    | X  |
| Esmaeili B., Hallowell M.R., Rajagopalan B.           | Attribute-Based Safety Risk Assessment. I: Analysis at the Fundamental Level                                                     | Journal of construction engineering and management | 2015 | 10.1061/(ASCE)CO.1943-7862.0000980 |    |    | X  |
| Esther Paik J., Miller V., Mollaoglu S., Aaron Sun W. | Interorganizational Projects: Reexamining Innovation Implementation via IPD                                                      | Journal of management in engineering               | 2017 | 10.1061/(ASCE)ME.1943-5479.0000524 |    |    | X  |
| Eteifa S.O., El-Adaway I.H.                           | Using Social Network Analysis to Model the Interaction between Root Causes of Fatalities in the Construction Industry            | Journal of management in engineering               | 2018 | 10.1061/(ASCE)ME.1943-5479.0000567 |    |    | X  |
| Ewart I.J.                                            | The social consequences of minor innovations in construction                                                                     | Construction management and economics              | 2019 | 10.1080/01446193.2019.1614202      |    |    | X  |
| Eyiah-Botwe E., Aigbavboa C.O., Thwala W.D.           | Curbing PPP construction projects' failure using enhanced stakeholder management success in                                      | Built environment project and asset management     | 2019 | 10.1108/BEPAM-01-2018-0035         |    |    | X  |
| Fadiya, O; Georgakis, P; Chinyio, E; Nwagboso, C      | Decision-making framework for selecting ICT-based construction logistics systems                                                 | Journal of engineering design and technology       | 2015 | 10.1108/JEDT-07-2011-0047          | X  |    |    |

| Authors                                                                | Article Title                                                                                                        | Source Title                                          | Year | DOI                                | C1 | C2 | C3 |
|------------------------------------------------------------------------|----------------------------------------------------------------------------------------------------------------------|-------------------------------------------------------|------|------------------------------------|----|----|----|
| Faghihi V., Reinschmidt K.F., Kang J.H.                                | Objective-driven and Pareto Front analysis: Optimizing time, cost, and job-site                                      | Automation in construction                            | 2016 | 10.1016/j.autcon.2016.06.003       |    |    | X  |
| Fahmy A., Hassan T., Bassioni H., McCaffer R.                          | Dynamic scheduling model for the construction industry                                                               | Built environment project and asset management        | 2019 | 10.1108/BEPAM-02-2019-0021         |    |    | X  |
| Fallahpour A., Wong K.Y., Rajoo S., Olugu E.U., Nilashi M., Turskis Z. | A fuzzy decision support system for sustainable construction project selection: An integrated fpp-                   | Journal of civil engineering and management           | 2020 | 10.3846/jcem.2020.12183            |    |    | X  |
| Fan C.-L.                                                              | Defect Risk Assessment Using a Hybrid Machine Learning Method                                                        | Journal of construction engineering and management    | 2020 | 10.1061/(ASCE)CO.1943-7862.0001897 |    |    | X  |
| Fan S.-L., Chong H.-Y., Hung T.-W., Wang Y.-C.                         | Cost-based scheduling method using object-oriented                                                                   | Automation in construction                            | 2016 | 10.1016/j.autcon.2016.01.007       |    |    | X  |
| Fan, HQ; Xue, F; Li, H                                                 | Project-Based As-Needed Information Retrieval from Unstructured AEC                                                  | Journal of management in engineering                  | 2015 | 10.1061/(ASCE)ME.1943-5479.0000341 | X  |    |    |
| Fan, XZ; Matsumoto, T                                                  | GIS-Based Social Cost-Benefit Analysis on Integrated Urban Water Management in China: A Case Study of Sponge City in | Sustainability                                        | 2019 | 10.3390/su11195527                 |    |    | X  |
| Fang D., Wu C., Wu H.                                                  | Impact of the supervisor on worker safety behavior in construction projects                                          | Journal of management in engineering                  | 2015 | 10.1061/(ASCE)ME.1943-5479.0000355 |    |    | X  |
| Fang Y., Cho Y.K., Zhang S., Perez E.                                  | Case Study of BIM and Cloud-Enabled Real-Time RFID Indoor Localization for Construction Management Applications      | Journal of construction engineering and management    | 2016 | 10.1061/(ASCE)CO.1943-7862.0001125 |    |    | X  |
| Fang Y., Ng S.T.                                                       | Genetic algorithm for determining the construction logistics of precast                                              | Engineering construction and architectural management | 2019 | 10.1108/ECAM-09-2018-0386          |    |    | X  |

| Authors                                                         | Article Title                                                                                                          | Source Title                                                 | Year | DOI                                | C1 | C2 | C3 |
|-----------------------------------------------------------------|------------------------------------------------------------------------------------------------------------------------|--------------------------------------------------------------|------|------------------------------------|----|----|----|
| Fang, QY; Chen, LW; Zeng, DL; Zhang, L                          | Drivers of Professional Service Model Innovation in the Chinese Construction                                           | Sustainability                                               | 2019 | 10.3390/su11040941                 |    |    | X  |
| Farajmandi M., Ali M., Hermann R., AbouRizk S.                  | A decision support tool for planning module installation in industrial construction                                    | Engineering construction and architectural management        | 2020 | 10.1108/ECAM-01-2019-0069          |    | X  |    |
| Faris, H; Gaterell, M; Hutchinson, D                            | Investigating underlying factors of collaboration for construction projects in emerging economies using                | International journal of construction management             | 2019 | 10.1080/15623599.2019.1635758      | X  |    | X  |
| Farnsworth C.B., Beveridge S., Miller K.R., Christofferson J.P. | Application, Advantages, and Methods Associated with Using BIM in Commercial Construction                              | International journal of construction education and research | 2015 | 10.1080/15578771.2013.865683       | X  |    |    |
| Farnsworth C.B., Warr R.O., Weidman J.E., Mark Hutchings D.     | Effects of CM/GC Project Delivery on Managing Process Risk in Transportation Construction                              | Journal of construction engineering and management           | 2016 | 10.1061/(ASCE)CO.1943-7862.0001091 |    |    | X  |
| Farooq M.U., Thaheem M.J., Arshad H.                            | Improving the risk quantification under behavioural tendencies: A                                                      | International journal of project management                  | 2018 | 10.1016/j.ijproman.2017.12.004     |    |    | X  |
| Farshchian M.M., Heravi G.                                      | Probabilistic Assessment of Cost, Time, and Revenue in a Portfolio of Projects Using Stochastic Agent-Based Simulation | Journal of construction engineering and management           | 2018 | 10.1061/(ASCE)CO.1943-7862.0001476 |    |    | X  |
| Farshchian M.M., Heravi G., Abourizk S.                         | Optimizing the owner's scenarios for budget allocation in a portfolio of projects using agent-based                    | Journal of construction engineering and management           | 2017 | 10.1061/(ASCE)CO.1943-7862.0001315 |    |    | X  |
| Fayek A.R.                                                      | Fuzzy Logic and Fuzzy Hybrid Techniques for Construction Engineering and                                               | Journal of construction engineering and management           | 2020 | 10.1061/(ASCE)CO.1943-7862.0001854 |    |    | X  |

| Authors                                                               | Article Title                                                                                                                                | Source Title                                          | Year | DOI                                | C1 | C2 | C3 |
|-----------------------------------------------------------------------|----------------------------------------------------------------------------------------------------------------------------------------------|-------------------------------------------------------|------|------------------------------------|----|----|----|
| Feghaly J., El Asmar M., Ariaratnam S., Bearup W.                     | Selecting project delivery methods for water treatment plants                                                                                | Engineering construction and architectural management | 2019 | 10.1108/ECAM-06-2019-0308          |    |    | X  |
| Feiz R., Ammenberg J., Baas L., Eklund M., Helgstrand A., Marshall R. | Improving the CO2 performance of cement, part I: Utilizing life-cycle assessment and key performance indicators to assess development within | Journal of cleaner production                         | 2015 | 10.1016/j.jclepro.2014.01.083      |    | X  |    |
| Fellows R., Liu A.                                                    | Sensemaking in the cross-cultural contexts of projects                                                                                       | International journal of project management           | 2016 | 10.1016/j.ijproman.2015.03.010     |    |    | X  |
| Fellows R., Liu A.M.M.                                                | ‘What does this mean’? Sensemaking in the strategic action field of construction                                                             | Construction management and economics                 | 2017 | 10.1080/01446193.2016.1231409      |    |    | X  |
| Fellows R.F., Liu A.M.M.                                              | Where do I go from here? Motivated reasoning in construction decisions                                                                       | Construction management and economics                 | 2018 | 10.1080/01446193.2018.1472386      |    |    | X  |
| Feng C., Liao X.                                                      | An overview of “Energy + Internet” in China                                                                                                  | Journal of cleaner production                         | 2020 | 10.1016/j.jclepro.2020.120630      |    | X  | X  |
| Feng Y., Trinh M.T.                                                   | Developing Resilient Safety Culture for Construction Projects                                                                                | Journal of construction engineering and management    | 2019 | 10.1061/(ASCE)CO.1943-7862.0001720 |    |    | X  |
| Feng, KL; Lu, WZ; Olofsson, T; Chen, SW; Yan, H; Wang, YW             | A Predictive Environmental Assessment Method for Construction Operations: Application to a Northeast China Case Study                        | Sustainability                                        | 2018 | 10.3390/su10113868                 |    |    | X  |
| Feng, YB                                                              | Mathematical Models for Determining the Minimum Level of Voluntary Safety Investments for Building Projects                                  | Journal of construction engineering and management    | 2015 | 10.1061/(ASCE)CO.1943-7862.0000987 |    |    | X  |

| Authors                                                          | Article Title                                                                                               | Source Title                                       | Year | DOI                                | C1 | C2 | C3 |
|------------------------------------------------------------------|-------------------------------------------------------------------------------------------------------------|----------------------------------------------------|------|------------------------------------|----|----|----|
| Fernandes, DA; Costa, AA; Lahdenpera, P                          | Key features of a project alliance and their impact on the success of an apartment renovation: a case study | International journal of construction management   | 2018 | 10.1080/15623599.2017.1344913      |    |    | X  |
| Fini, AAF; Akbarnezhad, A; Rashidi, TH; Waller, ST               | Job Assignment Based on Brain Demands and Human Resource Strategies                                         | Journal of construction engineering and management | 2017 | 10.1061/(ASCE)CO.1943-7862.0001273 |    |    | X  |
| Fini, AAF; Akbarnezhad, A; Rashidi, TH; Waller, ST               | Dynamic Programming Approach toward Optimization of Workforce Planning Decisions                            | Journal of construction engineering and management | 2018 | 10.1061/(ASCE)CO.1943-7862.0001434 |    |    | X  |
| Fiolet J.-C., Haas C., Hipel K.                                  | Risk-chasing behaviour in on-site construction decisions                                                    | Construction management and economics              | 2016 | 10.1080/01446193.2016.1207790      |    |    | X  |
| Firouzi A., Vahdatmanesh M.                                      | Applicability of Financial Derivatives for Hedging Material Price Risk in Highway construction              | Journal of construction engineering and management | 2019 | 10.1061/(ASCE)cO.1943-7862.0001639 |    |    | X  |
| Florez L., Armstrong P., Cortisoz J.C.                           | Does Compatibility of Personality Affect Productivity? Exploratory Study with Construction                  | Journal of management in engineering               | 2020 | 10.1061/(ASCE)ME.1943-5479.0000807 |    |    | X  |
| Forcada N., Serrat C., Rodríguez S., Bortolini R.                | Communication Key Performance Indicators for Selecting Construction Project Bidders                         | Journal of management in engineering               | 2017 | 10.1061/(ASCE)ME.1943-5479.0000552 | X  |    | X  |
| Forcada, N; Gangoellis, M; Casals, M; Macarulla, M               | Factors Affecting Rework Costs in Construction                                                              | Journal of construction engineering and management | 2017 | 10.1061/(ASCE)CO.1943-7862.0001324 |    |    | X  |
| Francart N., Larsson M., Malmqvist T., Erlandsson M., Florell J. | Requirements set by Swedish municipalities to promote construction with low climate change impact           | Journal of cleaner production                      | 2019 | 10.1016/j.jclepro.2018.10.053      |    |    | X  |

| Authors                                         | Article Title                                                                                                      | Source Title                                             | Year | DOI                                | C1 | C2 | C3 |
|-------------------------------------------------|--------------------------------------------------------------------------------------------------------------------|----------------------------------------------------------|------|------------------------------------|----|----|----|
| Francom T., El Asmar M.,<br>Ariaratnam S.T.     | Performance Analysis of<br>Construction Manager at<br>Risk on Pipeline Engineering<br>and Construction Projects    | Journal of management in<br>engineering                  | 2016 | 10.1061/(ASCE)ME.1943-5479.0000456 |    |    | X  |
| Franz B.W., Leicht R.M.                         | An alternative classification<br>of project delivery methods<br>used in the United States<br>building construction | Construction management<br>and economics                 | 2016 | 10.1080/01446193.2016.1183800      |    |    | X  |
| Franz, B; Leicht, R;<br>Molenaar, K; Messner, J | Impact of Team Integration<br>and Group Cohesion on<br>Project Delivery Performance                                | Journal of construction<br>engineering and management    | 2017 | 10.1061/(ASCE)CO.1943-7862.0001219 | X  |    | X  |
| Freitas, LARU; Magrini, A                       | Waste Management in<br>Industrial Construction:<br>Investigating Contributions<br>from Industrial Ecology          | Sustainability                                           | 2017 | 10.3390/su9071251                  |    | X  | X  |
| Fu Y., Chen Y., Zhang S.,<br>Wang W.            | Promoting cooperation in<br>construction projects: an<br>integrated approach of<br>contractual incentive and       | Construction management<br>and economics                 | 2015 | 10.1080/01446193.2015.1087646      |    |    | X  |
| Fuchs, S; Scherer, RJ                           | Multimodels - Instant nD-<br>modeling using original data                                                          | Automation in construction                               | 2017 | 10.1016/j.autcon.2016.11.013       |    | X  | X  |
| Fulford, RG                                     | The implications of the<br>construction industry to<br>national wealth                                             | Engineering construction and<br>architectural management | 2019 | 10.1108/ECAM-03-2018-0091          |    | X  | X  |
| Gacasan, EMP; Wiggins,<br>MW; Searle, BJ        | The role of cues in expert<br>project manager sensemaking                                                          | Construction management<br>and economics                 | 2016 | 10.1080/01446193.2016.1177190      |    |    | X  |
| Gajpal Y., Elazouni A.                          | Enhanced heuristic for<br>finance-based scheduling of<br>construction projects                                     | Construction management<br>and economics                 | 2015 | 10.1080/01446193.2015.1063676      |    |    | X  |
| Galvin P., Tywoniak S.                          | How organizational boundary<br>choices impact capability<br>development                                            | Construction management<br>and economics                 | 2019 | 10.1080/01446193.2019.1582789      |    |    | X  |



| Authors                                                     | Article Title                                                                                                                   | Source Title                                          | Year | DOI                                | C1 | C2 | C3 |
|-------------------------------------------------------------|---------------------------------------------------------------------------------------------------------------------------------|-------------------------------------------------------|------|------------------------------------|----|----|----|
| Gambatese J.A., Pestana C., Lee H.W.                        | Alignment between Lean Principles and Practices and Worker Safety Behavior                                                      | Journal of construction engineering and management    | 2017 | 10.1061/(ASCE)CO.1943-7862.0001209 |    |    | X  |
| Gambo N., Said I., Ismail R.                                | Comparing the levels of performance of small scale local government contractors in Northern Nigeria with international practice | Engineering construction and architectural management | 2016 | 10.1108/ECAM-12-2014-0155          |    |    | X  |
| Gamil Y., Abdul Rahman I.                                   | Assessment of critical factors contributing to construction failure in Yemen                                                    | International journal of construction management      | 2020 | 10.1080/15623599.2018.1484866      |    |    | X  |
| Gamil, Y; Abdullah, MA; Abd Rahman, I; Asad, MM             | Internet of things in construction industry revolution 4.0 Recent trends and challenges in the                                  | Journal of engineering design and technology          |      | 10.1108/JEDT-06-2019-0164          |    | X  |    |
| Gan X., Chang R., Zuo J., Wen T., Zillante G.               | Barriers to the transition towards off-site construction in China: An Interpretive structural modeling approach                 | Journal of cleaner production                         | 2018 | 10.1016/j.jclepro.2018.06.184      |    | X  |    |
| Gan, Y; Shen, L; Chen, J; Tam, VWY; Tan, Y; Illankoon, IMCS | Critical Factors Affecting the Quality of Industrialized Building System Projects in                                            | Sustainability                                        | 2017 | 10.3390/su9020216                  |    |    | X  |
| Gao J., Ren H., Cai W.                                      | Risk assessment of construction projects in China under traditional and industrial production modes                             | Engineering construction and architectural management | 2019 | 10.1108/ECAM-01-2019-0029          |    | X  | X  |
| Gao N., Chen Y., Wang W., Wang Y.                           | Addressing Project Complexity: The Role of Contractual Functions                                                                | Journal of management in engineering                  | 2018 | 10.1061/(ASCE)ME.1943-5479.0000613 |    |    | X  |

| Authors                                    | Article Title                                                                                                                            | Source Title                                       | Year | DOI                                | C1 | C2 | C3 |
|--------------------------------------------|------------------------------------------------------------------------------------------------------------------------------------------|----------------------------------------------------|------|------------------------------------|----|----|----|
| Gao R., Chan A.P.C., Utama W.P., Zahoor H. | Workers' Perceptions of Safety Climate in International Construction Projects: Effects of Nationality, Religious Belief,                 | Journal of construction engineering and management | 2017 | 10.1061/(ASCE)CO.1943-7862.0001226 |    |    | X  |
| Gao S., Ling S., Liu X., Dou X., Wu R.     | Understanding local government's information disclosure in China's environmental project construction from the dual-pressure perspective | Journal of cleaner production                      | 2020 | 10.1016/j.jclepro.2020.121311      |    | X  | X  |
| Gao S., Low S.P.                           | Toyota Way style human resource management in large Chinese construction firms: A qualitative study                                      | International journal of construction management   | 2015 | 10.1080/15623599.2015.1012139      |    |    | X  |
| Gao S., Low S.P.                           | Implementing Toyota Way principles for construction projects in China: A case                                                            | International journal of construction management   | 2015 | 10.1080/15623599.2015.1066567      |    |    | X  |
| Gao, L; Zhao, ZY                           | The Evolutionary Game of Stakeholders' Coordination Mechanism of New Energy Power Construction PPP Project: A China Case                 | Sustainability                                     | 2020 | 10.3390/su12031045                 |    |    | X  |
| Gao, SC; Song, XY; Ding, RG                | Promoting Information Transfer in Collaborative Projects through Network Structure Adjustment                                            | Journal of construction engineering and management | 2020 | 10.1061/(ASCE)CO.1943-7862.0001772 | X  |    | X  |
| Garcia A.J., Mollaoglu S.                  | Measuring Key Knowledge-Related Factors for Individuals in AEC Project                                                                   | Journal of construction engineering and management | 2020 | 10.1061/(ASCE)CO.1943-7862.0001850 |    |    | X  |

| Authors                                                   | Article Title                                                                                                                                                                | Source Title                                             | Year | DOI                             | C1 | C2 | C3 |
|-----------------------------------------------------------|------------------------------------------------------------------------------------------------------------------------------------------------------------------------------|----------------------------------------------------------|------|---------------------------------|----|----|----|
| Ge, XP; Zhu, F; Yang, YJ;<br>Liu, GJ; Chen, F             | Probing Influence Factors of<br>Implementation Patterns for<br>Sustainable Land<br>Consolidation: Insights from<br>Seventeen Years of Practice<br>in Jiangsu Province, China | Sustainability                                           | 2020 | 10.3390/su12093576              |    |    | X  |
| Gelowitz M.D.C., McArthur<br>J.J.                         | Insights on environmental<br>product declaration use from<br>Canada's first LEED® v4<br>platinum commercial project                                                          | Resources, conservation and<br>recycling                 | 2018 | 10.1016/j.resconrec.2018.05.008 |    | X  |    |
| Gerek I.H., Erdis E.,<br>Mistikoglu G., Usmen M.          | Modelling masonry crew<br>productivity using two<br>artificial neural network                                                                                                | Journal of civil engineering<br>and management           | 2015 | 10.3846/13923730.2013.802741    |    |    | X  |
| Gerrish, T; Ruikar, K; Cook,<br>M; Johnson, M; Phillip, M | Using BIM capabilities to<br>improve existing building<br>energy modelling practices                                                                                         | Engineering construction and<br>architectural management | 2017 | 10.1108/ECAM-11-2015-0181       |    |    | X  |
| Getuli V., Capone P., Bruttini<br>A.                      | Planning, management and<br>administration of HS contents<br>with BIM and VR in<br>construction: an<br>implementation protocol                                               | Engineering construction and<br>architectural management | 2020 | 10.1108/ECAM-11-2019-0647       |    |    | X  |
| Getuli V., Capone P., Bruttini<br>A., Isaac S.            | BIM-based immersive Virtual<br>Reality for construction<br>workspace planning: A safety-<br>oriented approach                                                                | Automation in construction                               | 2020 | 10.1016/j.autcon.2020.103160    |    |    | X  |
| Ghaffar S.H., Burman M.,<br>Braumah N.                    | Pathways to circular<br>construction: An integrated<br>management of construction<br>and demolition waste for<br>resource recovery                                           | Journal of cleaner production                            | 2020 | 10.1016/j.jclepro.2019.118710   |    | X  | X  |

| Authors                                                                                            | Article Title                                                                                                         | Source Title                                                 | Year | DOI                                | C1 | C2 | C3 |
|----------------------------------------------------------------------------------------------------|-----------------------------------------------------------------------------------------------------------------------|--------------------------------------------------------------|------|------------------------------------|----|----|----|
| GhaffarianHoseini A., Zhang T., Naismith N., GhaffarianHoseini A., Doan D.T., Rehman A.U., Nwadigo | ND BIM-integrated knowledge-based building management: Inspecting post-construction energy                            | Automation in construction                                   | 2019 | 10.1016/j.autcon.2018.10.003       | X  |    | X  |
| Ghanbaripour A.N., Langston C., Yousefi A.                                                         | Implementation of 3D Integration Model for Project Delivery Success: Case Study                                       | Journal of construction engineering and management           | 2017 | 10.1061/(ASCE)CO.1943-7862.0001305 |    |    | X  |
| Ghanbaripour, AN; Sher, W; Yousefi, A                                                              | Critical success factors for subway construction projects - main contractors'                                         | International journal of construction management             | 2020 | 10.1080/15623599.2018.1484843      |    |    | X  |
| Ghasemi, F; Sari, MHM; Yousefi, V; Falsafi, R; Tamosaitiene, J                                     | Project Portfolio Risk Identification and Analysis, Considering Project Risk Interactions and Using Bayesian Networks | Sustainability                                               | 2018 | 10.3390/su10051609                 |    |    | X  |
| Ghazal M.M., Hammad A.                                                                             | Application of knowledge discovery in database (KDD) techniques in cost overrun of construction projects              | International journal of construction management             | 2020 | 10.1080/15623599.2020.1738205      |    |    | X  |
| Ghisellini, P; Ulgiati, S                                                                          | Circular economy transition in Italy. Achievements, perspectives and constraints                                      | Journal of cleaner production                                | 2020 | 10.1016/j.jclepro.2019.118360      |    | X  |    |
| Ghodrati, N; Yiu, TW; Wilkinson, S; Shahbazzpour, M                                                | Role of Management Strategies in Improving Labor Productivity in General Construction Projects in New Zealand:        | Journal of management in engineering                         | 2018 | 10.1061/(ASCE)ME.1943-5479.0000641 |    | X  | X  |
| Gholizadeh P., Esmaili B., Goodrum P.                                                              | Diffusion of building information modeling functions in the construction                                              | Journal of management in engineering                         | 2018 | 10.1061/(ASCE)ME.1943-5479.0000589 | X  |    | X  |
| Ghosh S., Dickerson D.E., Mills T.                                                                 | Effect of the Last Planner System® on Social Interactions among Project                                               | International journal of construction education and research | 2019 | 10.1080/15578771.2017.1407847      | X  |    |    |

| Authors                                               | Article Title                                                                                                         | Source Title                                          | Year | DOI                                | C1 | C2 | C3 |
|-------------------------------------------------------|-----------------------------------------------------------------------------------------------------------------------|-------------------------------------------------------|------|------------------------------------|----|----|----|
| Giamia E., Papadopoulos A.M.                          | Benchmarking carbon footprint and circularity in production processes: The case of stonewool and extruded polysterene | Journal of cleaner production                         | 2020 | 10.1016/j.jclepro.2020.120559      |    |    | X  |
| Giel B., Issa R.R.A.                                  | Framework for Evaluating the BIM Competencies of Facility Owners                                                      | Journal of management in engineering                  | 2016 | 10.1061/(ASCE)ME.1943-5479.0000378 |    |    | X  |
| Gijzel, D; Bosch-Rekveldt, M; Schraven, D; Hertogh, M | Integrating Sustainability into Major Infrastructure Projects: Four Perspectives on Sustainable Tunnel Development    | Sustainability                                        | 2020 | 10.3390/su12010006                 |    |    | X  |
| Gilchrist, A; Burton-Jones, A; Green, P               | The process of social alignment and misalignment within a complex IT project                                          | International journal of project management           | 2018 | 10.1016/j.ijproman.2018.04.004     |    |    | X  |
| Gimenez, J; Madrid-Guijarro, A; Durendez, A           | Competitive Capabilities for the Innovation and Performance of Spanish Construction Companies                         | Sustainability                                        | 2019 | 10.3390/su11195475                 |    |    | X  |
| Glatte T.                                             | Location strategies: Methods and their methodological limitations                                                     | Journal of engineering design and technology          | 2015 | 10.1108/JEDT-01-2013-0004          |    | X  |    |
| Gledson, BJ; Greenwood, D                             | The adoption of 4D BIM in the UK construction industry: an innovation diffusion                                       | Engineering construction and architectural management | 2017 | 10.1108/ECAM-03-2016-0066          |    |    | X  |
| Gluch P., Svensson I.                                 | On the nexus of changing public facilities management practices: purposive and co-creative actions across             | Construction management and economics                 | 2018 | 10.1080/01446193.2017.1381751      |    |    | X  |

| Authors                                                    | Article Title                                                                                                                 | Source Title                                          | Year | DOI                                | C1 | C2 | C3 |
|------------------------------------------------------------|-------------------------------------------------------------------------------------------------------------------------------|-------------------------------------------------------|------|------------------------------------|----|----|----|
| Goel A., Ganesh L.S., Kaur A.                              | Social sustainability considerations in construction project feasibility study: a                                             | Engineering construction and architectural management | 2020 | 10.1108/ECAM-06-2019-0319          |    |    | X  |
| Goel, A; Ganesh, LS; Kaur, A                               | Deductive content analysis of research on sustainable construction in India: current progress and future directions           | Journal of cleaner production                         | 2019 | 10.1016/j.jclepro.2019.03.314      |    |    | X  |
| Goel, A; Ganesh, LS; Kaur, A                               | Sustainability integration in the management of construction projects: A morphological analysis of over two decades' research | Journal of cleaner production                         | 2019 | 10.1016/j.jclepro.2019.117676      |    |    | X  |
| Goh M., Goh Y.M.                                           | Lean production theory-based simulation of modular construction processes                                                     | Automation in construction                            | 2019 | 10.1016/j.autcon.2018.12.017       |    |    | X  |
| Golabchi, A; Guo, X; Liu, M; Han, S; Lee, S; AbouRizk, S   | An integrated ergonomics framework for evaluation and design of construction operations                                       | Automation in construction                            | 2018 | 10.1016/j.autcon.2018.08.003       |    |    | X  |
| Golizadeh H., Banihashemi S., Sadeghifam A.N., Preece C.   | Automated estimation of completion time for dam projects                                                                      | International journal of construction management      | 2017 | 10.1080/15623599.2016.1192249      |    |    | X  |
| Golparvar-Fard M., Peña-Mora F., Savarese S.               | Automated progress monitoring using unordered daily construction photographs and IFC-based building information models        | Journal of computing in civil engineering             | 2015 | 10.1061/(ASCE)CP.1943-5487.0000205 |    | X  |    |
| Golzarpour H., González V., Shahbazzpour M., O'Sullivan M. | An input-output simulation model for assessing production and environmental waste in                                          | Journal of cleaner production                         | 2017 | 10.1016/j.jclepro.2016.12.010      |    |    | X  |

| Authors                                                    | Article Title                                                                                                                                         | Source Title                                       | Year | DOI                                | C1 | C2 | C3 |
|------------------------------------------------------------|-------------------------------------------------------------------------------------------------------------------------------------------------------|----------------------------------------------------|------|------------------------------------|----|----|----|
| Gondia A., Siam A., El-Dakhakhni W., Nassar A.H.           | Machine Learning Algorithms for Construction Projects Delay Risk                                                                                      | Journal of construction engineering and management | 2020 | 10.1061/(ASCE)CO.1943-7862.0001736 |    |    | X  |
| Gong, J; Yu, Y; Krishnamoorthy, R; Roda, A                 | Real-time tracking of concrete vibration effort for intelligent concrete                                                                              | Automation in construction                         | 2015 | 10.1016/j.autcon.2015.03.017       |    |    | X  |
| Gong, P; Zeng, NS; Ye, KH; Konig, M                        | An Empirical Study on the Acceptance of 4D BIM in EPC Projects in China                                                                               | Sustainability                                     | 2019 | 10.3390/su11051316                 |    |    | X  |
| Gorecki, J; Diaz-Madronero, M                              | Who Risks and Wins?- Simulated Cost Variance in Sustainable Construction Projects                                                                     | Sustainability                                     | 2020 | 10.3390/su12083370                 |    |    | X  |
| Gosling, J; Naim, M; Towill, D; Abouarghoub, W; Moone, B   | Supplier development initiatives and their impact on the consistency of project performance                                                           | Construction management and economics              | 2015 | 10.1080/01446193.2015.1028956      |    | X  | X  |
| Gosling, J; Pero, M; Schoenwitz, M; Towill, D; Cigolini, R | Defining and Categorizing Modules in Building Projects: An International                                                                              | Journal of construction engineering and management | 2016 | 10.1061/(ASCE)CO.1943-7862.0001181 |    |    | X  |
| Gottlieb, SC; Frederiksen, N; Koch, C; Thuesen, C          | Hybrid organisations as trading zones: responses to institutional complexity in the shaping of strategic                                              | Construction management and economics              | 2020 | 10.1080/01446193.2020.1738514      |    |    | X  |
| Gottsche J., Kelly M., Taggart M.                          | Assessing the impact of energy management initiatives on the energy usage during the construction phase of an educational building project in Ireland | Construction management and economics              | 2016 | 10.1080/01446193.2016.1162317      |    |    | X  |
| Govan P., Damjanovic I.                                    | The resource-based view on project risk management                                                                                                    | Journal of construction engineering and management | 2016 | 10.1061/(ASCE)CO.1943-7862.0001136 |    |    | X  |

| Authors                                                                                                                                     | Article Title                                                                                                                             | Source Title                                       | Year | DOI                                | C1 | C2 | C3 |
|---------------------------------------------------------------------------------------------------------------------------------------------|-------------------------------------------------------------------------------------------------------------------------------------------|----------------------------------------------------|------|------------------------------------|----|----|----|
| Govigli, VM; Alkhaled, S; Arnesen, T; Barlagne, C; Bjerck, M; Burlando, C; Melnykovych, M; Fernandez-Blanco, CR; Sfeir, P; Gorriz-Mifsud, E | Testing a Framework to Co-Construct Social Innovation Actions: Insights from Seven Marginalized Rural Areas                               | Sustainability                                     | 2020 | 10.3390/su12041441                 |    |    | X  |
| Gransberg D.D., Shane J.S.                                                                                                                  | Defining best value for construction manager/general contractor projects: The CMGC learning curve                                         | Journal of management in engineering               | 2015 | 10.1061/(ASCE)ME.1943-5479.0000275 |    |    | X  |
| Grau D., Back W.E.                                                                                                                          | Predictability Index: Novel Metric to Assess Cost and Schedule Performance                                                                | Journal of construction engineering and management | 2015 | 10.1061/(ASCE)CO.1943-7862.0000994 |    |    | X  |
| Green S.D., Sergeeva N.                                                                                                                     | Value creation in projects: Towards a narrative                                                                                           | International journal of project management        | 2019 | 10.1016/j.ijproman.2018.12.004     |    |    | X  |
| Griffiths, K; Boyle, C; Henning, TFP                                                                                                        | Beyond the Certification Badge-How Infrastructure Sustainability Rating Tools Impact on Individual, Organizational, and Industry Practice | Sustainability                                     | 2018 | 10.3390/su10041038                 |    |    | X  |
| Grosse H.                                                                                                                                   | An insider's point of view: autoethnography in the construction industry                                                                  | Construction management and economics              | 2019 | 10.1080/01446193.2018.1501156      |    |    | X  |
| Gu, SY; Zhang, P; Yang, JY                                                                                                                  | SYSTEM DYNAMICS MODEL BASED ON EVOLUTIONARY GAME THEORY FOR QUALITY SUPERVISION AMONG CONSTRUCTION STAKEHOLDERS                           | Journal of civil engineering and management        | 2018 | 10.3846/jcem.2018.3068             |    |    | X  |



| Authors                                                 | Article Title                                                                                                                    | Source Title                                          | Year | DOI                                | C1 | C2 | C3 |
|---------------------------------------------------------|----------------------------------------------------------------------------------------------------------------------------------|-------------------------------------------------------|------|------------------------------------|----|----|----|
| Guan L., Abbasi A., Ryan M.J.                           | Analyzing green building project risk interdependencies using                                                                    | Journal of cleaner production                         | 2020 | 10.1016/j.jclepro.2020.120372      |    |    | X  |
| Guarini, MR; Morano, P; Sica, F                         | Historical School Buildings. A Multi-Criteria Approach for Urban Sustainable                                                     | Sustainability                                        | 2020 | 10.3390/su12031076                 |    |    | X  |
| Guevara, J; Garvin, MJ; Ghaffarzadegan, N               | The Forest and the Trees: A Systems Map of Governance Interdependencies in the Shaping Phase of Road Public-Private Partnerships | Journal of management in engineering                  | 2020 | 10.1061/(ASCE)ME.1943-5479.0000726 |    |    | X  |
| Gultekin-Bicer P., Anumba C.J., Leicht R.M.             | Advanced energy retrofit projects: cross-case analysis of integrated system design                                               | International journal of construction management      | 2018 | 10.1080/15623599.2017.1337959      |    |    | X  |
| Gunarathna C., Yang R.J., Fernando N.                   | Conflicts and management styles in the Sri Lankan commercial building sector                                                     | Engineering construction and architectural management | 2018 | 10.1108/ECAM-10-2016-0233          |    |    | X  |
| Gunarathne, AS; Zainudeen, N; Perera, CSR; Perera, BAKS | A framework of an integrated sustainability and value engineering concepts for construction projects                             | International journal of construction management      |      | 10.1080/15623599.2020.1768624      |    |    | X  |
| Gunduz M., Abdi E.A.                                    | Motivational Factors and Challenges of Cooperative Partnerships between Contractors in the Construction Industry                 | Journal of management in engineering                  | 2020 | 10.1061/(ASCE)ME.1943-5479.0000773 |    |    | X  |
| Gunduz M., Elsherbeny H.A.                              | Critical assessment of construction contract administration using fuzzy structural equation modeling                             | Engineering construction and architectural management | 2020 | 10.1108/ECAM-05-2019-0246          |    |    | X  |

| Authors                           | Article Title                                                                                                                     | Source Title                                       | Year | DOI                                | C1 | C2 | C3 |
|-----------------------------------|-----------------------------------------------------------------------------------------------------------------------------------|----------------------------------------------------|------|------------------------------------|----|----|----|
| Gunduz M., Elsherbeny H.A.        | Operational Framework for Managing Construction-Contract Administration Practitioners' Perspective through Modified Delphi Method | Journal of construction engineering and management | 2020 | 10.1061/(ASCE)CO.1943-7862.0001768 |    |    | X  |
| Gunduz M., Laitinen H.            | Construction safety risk assessment with introduced control levels                                                                | Journal of civil engineering and management        | 2018 | 10.3846/jcem.2018.284              |    |    | X  |
| Gunduz, M; Almuajebh, M           | Critical Success Factors for Sustainable Construction Project Management                                                          | Sustainability                                     | 2020 | 10.3390/su12051990                 |    |    | X  |
| Gunduz, M; Elsherbeny, HA         | Construction Contract Administration Performance Assessment Tool by Using a Fuzzy Structural Equation Model                       | Sustainability                                     | 2020 | 10.3390/su12020523                 |    |    | X  |
| Gunduz, M; Naser, AF              | Cost Based Value Stream Mapping as a Sustainable Construction Tool for Undergraound Pipeline Construction Projects                | Sustainability                                     | 2017 | 10.3390/su9122184                  |    |    | X  |
| Gunduz, M; Nielsen, Y; Ozdemir, M | Fuzzy Assessment Model to Estimate the Probability of Delay in Turkish Construction Projects                                      | Journal of management in engineering               | 2015 | 10.1061/(ASCE)ME.1943-5479.0000261 |    |    | X  |
| Guo B.H.W., Yiu T.W.              | Developing Leading Indicators to Monitor the Safety Conditions of                                                                 | Journal of management in engineering               | 2016 | 10.1061/(ASCE)ME.1943-5479.0000376 |    |    | X  |
| Guo S., Xiong C., Gong P.         | A real-time control approach based on intelligent video surveillance for violations by construction workers                       | Journal of civil engineering and management        | 2018 | 10.3846/jcem.2018.301              |    |    | X  |

| Authors                                      | Article Title                                                                                                                                                      | Source Title                                          | Year | DOI                                | C1 | C2 | C3 |
|----------------------------------------------|--------------------------------------------------------------------------------------------------------------------------------------------------------------------|-------------------------------------------------------|------|------------------------------------|----|----|----|
| Guo, BHW; Yiu, TW;<br>Gonzalez, VA; Goh, YM  | Using a Pressure-State-<br>Practice Model to Develop<br>Safety Leading Indicators for<br>Construction Projects                                                     | Journal of construction<br>engineering and management | 2017 | 10.1061/(ASCE)CO.1943-7862.0001218 |    |    | X  |
| Guo, FY; Jahren, CT;<br>Turkan, Y; Jeong, HD | Civil Integrated Management:<br>An Emerging Paradigm for<br>Civil Infrastructure Project<br>Delivery and Management                                                | Journal of management in<br>engineering               | 2017 | 10.1061/(ASCE)ME.1943-5479.0000491 |    |    | X  |
| Guo, HL; Yu, R; Fang, YH                     | Analysis of negative impacts<br>of BIM-enabled information<br>transparency on contractors'<br>interests                                                            | Automation in construction                            | 2019 | 10.1016/j.autcon.2019.03.007       |    |    | X  |
| Guo, JJ; Yuan, L; Wang, Q                    | Time and cost analysis of<br>geometric quality assessment<br>of structural columns based<br>on 3D terrestrial laser                                                | Automation in construction                            | 2020 | 10.1016/j.autcon.2019.103014       |    |    | X  |
| Guo, JX; Hu, CM; Bao, R                      | Predicting the Duration of a<br>General Contracting<br>Industrial Project based on<br>the Residual Modified Model                                                  | KSCE journal of civil<br>engineering                  | 2019 | 10.1007/s12205-019-1543-7          |    | X  |    |
| Guo, SJ; Wang, XQ; Fu, LP;<br>Liu, YF        | How Individual's Proactive<br>Behavior Helps Construction<br>Sustainability: Exploring the<br>Effects of Project Citizenship<br>Behavior on Project<br>Performance | Sustainability                                        | 2019 | 10.3390/su11246922                 |    | X  | X  |
| Gurevich U., Sacks R.                        | Longitudinal Study of BIM<br>Adoption by Public<br>Construction Clients                                                                                            | Journal of management in<br>engineering               | 2020 | 10.1061/(ASCE)ME.1943-5479.0000797 |    |    | X  |
| Gurmu A.T.                                   | Construction materials<br>management practices<br>enhancing labour<br>productivity in multi-storey                                                                 | International journal of<br>construction management   | 2020 | 10.1080/15623599.2018.1462447      |    |    | X  |

| Authors                                               | Article Title                                                                                                                                              | Source Title                                          | Year | DOI                                | C1 | C2 | C3 |
|-------------------------------------------------------|------------------------------------------------------------------------------------------------------------------------------------------------------------|-------------------------------------------------------|------|------------------------------------|----|----|----|
| Gurmu A.T.                                            | Tools for Measuring Construction Materials Management Practices and Predicting Labor Productivity in Multistory Building                                   | Journal of construction engineering and management    | 2019 | 10.1061/(ASCE)CO.1943-7862.0001611 |    | X  | X  |
| Gurmu A.T., Aibinu A.A.                               | Construction Equipment Management Practices for Improving Labor Productivity in Multistory Building                                                        | Journal of construction engineering and management    | 2017 | 10.1061/(ASCE)CO.1943-7862.0001384 |    |    | X  |
| Gurmu A.T., Ongkowitzo C.S.                           | Predicting Construction Labor Productivity Based on Implementation Levels of Human Resource Management Practices                                           | Journal of construction engineering and management    | 2020 | 10.1061/(ASCE)CO.1943-7862.0001775 |    |    | X  |
| Gustavsson T.K.                                       | Liminal roles in construction project practice: exploring change through the roles of partnering manager, building logistic specialist and BIM coordinator | Construction management and economics                 | 2018 | 10.1080/01446193.2018.1464197      |    |    | X  |
| Hadidi L., Assaf S., Alkhami A.                       | A systematic approach for ERP implementation in the construction industry                                                                                  | Journal of civil engineering and management           | 2017 | 10.3846/13923730.2016.1215348      |    |    | X  |
| Hajdasz M.                                            | Managing repetitive construction in a dynamically changing project environment: Conceptualizing the system-                                                | Automation in construction                            | 2015 | 10.1016/j.autcon.2015.05.005       |    |    | X  |
| Haji Karimian S., Mbachu J., Egbelakin T., Shahzad W. | Improving efficiency in roading projects: a New                                                                                                            | Engineering construction and architectural management | 2019 | 10.1108/ECAM-02-2018-0060          |    |    | X  |

| Authors                                           | Article Title                                                                                                                                | Source Title                                     | Year | DOI                                | C1 | C2 | C3 |
|---------------------------------------------------|----------------------------------------------------------------------------------------------------------------------------------------------|--------------------------------------------------|------|------------------------------------|----|----|----|
| Hall D.M., Algiers A., Levitt R.E.                | Identifying the Role of Supply Chain Integration Practices in the Adoption of Systemic Innovations                                           | Journal of management in engineering             | 2018 | 10.1061/(ASCE)ME.1943-5479.0000640 | X  |    | X  |
| Hall D.M., Whyte J.K., Lessing J.                 | Mirror-breaking strategies to enable digital manufacturing in Silicon Valley construction firms: a comparative case                          | Construction management and economics            | 2020 | 10.1080/01446193.2019.1656814      |    | X  |    |
| Ham, N; Lee, SH                                   | Empirical Study on Structural Safety Diagnosis of Large-Scale Civil Infrastructure Using Laser Scanning and                                  | Sustainability                                   | 2018 | 10.3390/su10114024                 |    |    | X  |
| Ham, N; Moon, S; Kim, JH; Kim, JJ                 | Optimal BIM staffing in construction projects using a queueing model                                                                         | Automation in construction                       | 2020 | 10.1016/j.autcon.2020.103123       |    |    | X  |
| Hamid W., Tutt D.                                 | “Thrown away like a banana leaf”: precarity of labour and precarity of place for Tamil migrant construction workers in Singapore             | Construction management and economics            | 2019 | 10.1080/01446193.2019.1595075      |    |    | X  |
| Hamledari H., Rezazadeh Azar E., McCabe B.        | IFC-Based Development of As-Built and As-Is BIMs Using Construction and Facility Inspection Data: Site-to-BIM Data Transfer                  | Journal of computing in civil engineering        | 2018 | 10.1061/(ASCE)CP.1943-5487.0000727 |    | X  |    |
| Hamzaoui, F; Allal, MA; Taillandier, F; Achoui, M | Risk management in construction projects by coupling the SMACC agent with the MADS MOSAR method - application to the dam project in Mascara, | International journal of construction management |      | 10.1080/15623599.2019.1641890      |    |    | X  |

| Authors                                                                                                 | Article Title                                                                                                 | Source Title                                          | Year | DOI                                | C1 | C2 | C3 |
|---------------------------------------------------------------------------------------------------------|---------------------------------------------------------------------------------------------------------------|-------------------------------------------------------|------|------------------------------------|----|----|----|
| Hamzeh A.M., Mousavi S.M., Gitinavard H.                                                                | Imprecise earned duration model for time evaluation of construction projects with risk considerations         | Automation in construction                            | 2020 | 10.1016/j.autcon.2019.102993       |    |    | X  |
| Hamzeh F., Al Hattab M., Rizk L., El Samad G., Emdanat S.                                               | Developing new metrics to evaluate the performance of capacity planning towards sustainable construction      | Journal of cleaner production                         | 2019 | 10.1016/j.jclepro.2019.04.021      |    |    | X  |
| Hamzeh F., Ghani O.A., Bacha M.B.S., Abbas Y.                                                           | Modular concrete construction the differing perspectives of designers, manufacturers, and                     | Engineering construction and architectural management | 2017 | 10.1108/ECAM-11-2014-0148          |    |    | X  |
| Hamzeh F., Rached F., Hraoui Y., Karam A.J., Malaeb Z., El Asmar M., Hamzeh F.R., Faek F., AlHussein H. | Integrated project delivery as an enabler for collaboration: a Middle East perspective                        | Built environment project and asset management        | 2019 | 10.1108/BEPAM-05-2018-0084         |    |    | X  |
|                                                                                                         | Understanding improvisation in construction through antecedents, behaviours and consequences                  | Construction management and economics                 | 2019 | 10.1080/01446193.2018.1497189      |    |    | X  |
| Hamzeh F.R., Saab I., Tommelein I.D., Ballard G.                                                        | Understanding the role of "tasks anticipated" in lookahead planning through                                   | Automation in construction                            | 2015 | 10.1016/j.autcon.2014.09.005       |    | X  |    |
| Hamzeh F.R., Zankoul E., Rouhana C.                                                                     | How can 'tasks made ready' during lookahead planning impact reliable workflow and project duration?           | Construction management and economics                 | 2015 | 10.1080/01446193.2015.1047878      |    |    | X  |
| Hamzeh, FR; Alhussein, H; Faek, F                                                                       | Investigating the Practice of Improvisation in                                                                | Journal of management in engineering                  | 2018 | 10.1061/(ASCE)ME.1943-5479.0000652 |    |    | X  |
| Han M.Y., Chen G.Q., Meng J., Wu X.D., Alsaedi A., Ahmad B.                                             | Virtual water accounting for a building construction engineering project with nine sub-projects: A case in E- | Journal of cleaner production                         | 2016 | 10.1016/j.jclepro.2015.07.048      |    |    | X  |

| Authors                                                           | Article Title                                                                                                                                      | Source Title                                          | Year | DOI                                | C1 | C2 | C3 |
|-------------------------------------------------------------------|----------------------------------------------------------------------------------------------------------------------------------------------------|-------------------------------------------------------|------|------------------------------------|----|----|----|
| Han S., Bouferguene A., Al-Hussein M., Hermann U.R.               | 3D-Based Crane Evaluation System for Mobile Crane Operation Selection on Modular-Based Heavy                                                       | Journal of construction engineering and management    | 2017 | 10.1061/(ASCE)CO.1943-7862.0001360 | X  | X  | X  |
| Han S., Hasan S., Bouferguene A., Al-Hussein M., Kosa J.          | An integrated decision support model for selecting the most feasible crane at heavy construction sites                                             | Automation in construction                            | 2018 | 10.1016/j.autcon.2017.12.009       |    | X  |    |
| Han Y., Li Y., Taylor J.E., Zhong J.                              | Characteristics and Evolution of Innovative Collaboration Networks in Architecture, Engineering, and Construction: Study of National Prize-Winning | Journal of construction engineering and management    | 2018 | 10.1061/(ASCE)CO.1943-7862.0001499 |    |    | X  |
| Han, BL; Meng, N; Zhang, JT; Cai, WB; Wu, T; Kong, LQ; Ouyang, ZY | Assessment and Management of Pressure on Water Quality Protection along the Middle Route of the South-to-North Water Diversion Project             | Sustainability                                        | 2019 | 10.3390/su11113087                 |    |    | X  |
| Han, J; Kim, S                                                    | Heritage Value through Regeneration Strategy in Mapo Cultural Oil Depot,                                                                           | Sustainability                                        | 2018 | 10.3390/su10093340                 |    | X  |    |
| Han, JJ; Rapoport, A; Fong, PSW                                   | Incentive structures in multi-partner project teams                                                                                                | Engineering construction and architectural management | 2020 | 10.1108/ECAM-09-2018-0410          |    |    | X  |
| Han, SH; Hasan, S; Bouferguene, A; Al-Hussein, M; Kosa, J         | Utilization of 3D Visualization of Mobile Crane Operations for Modular Construction On-                                                            | Journal of management in engineering                  | 2015 | 10.1061/(ASCE)ME.1943-5479.0000317 |    | X  | X  |
| Han, Y; Feng, ZD; Zhang, JJ; Jin, RY; Aboagye-Nimo, E             | Employees' Safety Perceptions of Site Hazard and Accident Scenes                                                                                   | Journal of construction engineering and management    | 2019 | 10.1061/(ASCE)CO.1943-7862.0001590 |    |    | X  |

| Authors                                                             | Article Title                                                                                                                        | Source Title                                       | Year | DOI                                | C1 | C2 | C3 |
|---------------------------------------------------------------------|--------------------------------------------------------------------------------------------------------------------------------------|----------------------------------------------------|------|------------------------------------|----|----|----|
| Hanna A.S.                                                          | Benchmark performance metrics for integrated project delivery                                                                        | Journal of construction engineering and management | 2016 | 10.1061/(ASCE)CO.1943-7862.0001151 | X  |    | X  |
| Hanna A.S., Ibrahim M.W., Lotfallah W., Iskandar K.A., Russell J.S. | Modeling Project Manager Competency: An Integrated Mathematical Approach                                                             | Journal of construction engineering and management | 2016 | 10.1061/(ASCE)CO.1943-7862.0001141 |    |    | X  |
| Hanna A.S., Iskandar K.A., Lotfallah W.                             | Benchmarking project performance: a guideline for assessing vulnerability of mechanical and electrical projects to productivity loss | Construction management and economics              | 2019 | 10.1080/01446193.2018.1513160      |    |    | X  |
| Hanna A.S., Mikhail G., Iskandar K.A.                               | State of Prefab Practice in the Electrical Construction Industry: Qualitative                                                        | Journal of construction engineering and management | 2017 | 10.1061/(ASCE)CO.1943-7862.0001236 |    |    | X  |
| Hao J., Yuan H., Liu J., Chin C.S., Lu W.                           | A model for assessing the economic performance of construction waste reduction                                                       | Journal of cleaner production                      | 2019 | 10.1016/j.jclepro.2019.05.348      |    |    | X  |
| Harper C.M., Molenaar K.R., Cannon J.P.                             | Measuring Constructs of Relational Contracting in Construction Projects: The Owner's Perspective                                     | Journal of construction engineering and management | 2016 | 10.1061/(ASCE)CO.1943-7862.0001169 |    |    | X  |
| Hartmann A., Dorée A.                                               | Learning between projects: More than sending messages in bottles                                                                     | International journal of project management        | 2015 | 10.1016/j.ijproman.2014.07.006     |    |    | X  |
| Hartono B., Sulistyono S.R., Chai K.H., Indarti N.                  | Knowledge Management Maturity and Performance in a Project Environment: Moderating Roles of Firm Size and Project Complexity         | Journal of management in engineering               | 2019 | 10.1061/(ASCE)ME.1943-5479.0000705 |    |    | X  |
| Harty C., Leiringer R.                                              | The futures of construction management research                                                                                      | Construction management and economics              | 2017 | 10.1080/01446193.2017.1306089      |    |    | X  |



| Authors                                                             | Article Title                                                                                                                | Source Title                                          | Year | DOI                                | C1 | C2 | C3 |
|---------------------------------------------------------------------|------------------------------------------------------------------------------------------------------------------------------|-------------------------------------------------------|------|------------------------------------|----|----|----|
| Hasan A., Ahn S.,<br>Rameezdeen R., Baroudi B.                      | Investigation into post-adoption usage of mobile ICTs in Australian                                                          | Engineering construction and architectural management | 2019 | 10.1108/ECAM-05-2019-0277          | X  |    | X  |
| Hasan A., Ahn S.,<br>Rameezdeen R., Baroudi B.                      | Empirical Study on Implications of Mobile ICT Use for Construction Project Management                                        | Journal of management in engineering                  | 2019 | 10.1061/(ASCE)ME.1943-5479.0000721 | X  | X  | X  |
| Hasan A., Jha K.N.                                                  | Acceptance of the incentive/disincentive contracting strategy in developing construction markets: Empirical study from India | Journal of construction engineering and management    | 2016 | 10.1061/(ASCE)CO.1943-7862.0001048 |    |    | X  |
| Hasan, A; Elmualim, A;<br>Rameezdeen, R; Baroudi, B;<br>Marshall, A | An exploratory study on the impact of mobile ICT on productivity in construction projects                                    | Built environment project and asset management        | 2018 | 10.1108/BEPAM-10-2017-0080         | X  |    | X  |
| Hasan, A; Jha, KN                                                   | Client and contractor roles in schedule incentive/disincentive projects An empirical study                                   | Engineering construction and architectural management | 2019 | 10.1108/ECAM-06-2017-0104          |    |    | X  |
| Hashemi, H; Mousavi, SM;<br>Zavadskas, EK; Chalekaee, A; Turskis, Z | A New Group Decision Model Based on Grey-Intuitionistic Fuzzy-ELECTRE and VIKOR for Contractor Assessment                    | Sustainability                                        | 2018 | 10.3390/su10051635                 |    | X  |    |
| Hasheminasab H., Gholipour Y., Kharrazi M., Streimikiene            | A novel Metric of Sustainability for petroleum                                                                               | Journal of cleaner production                         | 2018 | 10.1016/j.jclepro.2017.09.223      |    |    | X  |
| Hassan A., El-Rayes K.                                              | Quantifying the interruption impact of activity delays in non-serial repetitive construction projects                        | Construction management and economics                 | 2020 | 10.1080/01446193.2019.1657922      |    |    | X  |

| Authors                                               | Article Title                                                                                                                                   | Source Title                                             | Year | DOI                                | C1 | C2 | C3 |
|-------------------------------------------------------|-------------------------------------------------------------------------------------------------------------------------------------------------|----------------------------------------------------------|------|------------------------------------|----|----|----|
| Hassan M.E., Kandil A.,<br>Senouci A., Al-Derham H.   | Organizational behavior<br>attributes and sustainable<br>construction adoption: An<br>econometric analysis using<br>data from Qatar             | Journal of construction<br>engineering and management    | 2016 | 10.1061/(ASCE)CO.1943-7862.0001196 |    |    | X  |
| Hassim S., Muniandy R.,<br>Alias A.H., Abdullah P.    | Construction tender price<br>estimation standardization<br>(TPES) in Malaysia:<br>Modeling using fuzzy neural                                   | Engineering construction and<br>architectural management | 2018 | 10.1108/ECAM-09-2016-0215          |    |    | X  |
| Hastak, M; Koo, C                                     | Theory of an Intelligent<br>Planning Unit for the<br>Complex Built Environment                                                                  | Journal of management in<br>engineering                  | 2017 | 10.1061/(ASCE)ME.1943-5479.0000486 |    |    | X  |
| Hatamleh M.T., Hiyassat M.,<br>Sweis G.J., Sweis R.J. | Factors affecting the<br>accuracy of cost estimate:                                                                                             | Engineering construction and<br>architectural management | 2018 | 10.1108/ECAM-10-2016-0232          |    |    | X  |
| Hatefi S.M., Tamošaitienė J.                          | An integrated fuzzy<br>DEMATEL-fuzzy ANP<br>model for evaluating<br>construction projects by<br>considering interrelationships                  | Journal of civil engineering<br>and management           | 2018 | 10.3846/jcem.2019.8280             |    |    | X  |
| Hatefi, SM; Basiri, ME;<br>Tamosaitiene, J            | An Evidential Model for<br>Environmental Risk<br>Assessment in Projects Using<br>Dempster-Shafer Theory of                                      | Sustainability                                           | 2019 | 10.3390/su11226329                 |    |    | X  |
| Hatefi, SM; Tamosaitiene, J                           | Construction Projects<br>Assessment Based on the<br>Sustainable Development<br>Criteria by an Integrated<br>Fuzzy AHP and Improved<br>GRA Model | Sustainability                                           | 2018 | 10.3390/su10040991                 |    |    | X  |
| Haugbolle, K; Larsen, JN;<br>Nielsen, J               | Construction productivity<br>revisited: towards measuring<br>performance of construction<br>output                                              | Engineering construction and<br>architectural management | 2019 | 10.1108/ECAM-03-2018-0094          |    |    | X  |

| Authors                                                     | Article Title                                                                                                        | Source Title                                       | Year | DOI                                | C1 | C2 | C3 |
|-------------------------------------------------------------|----------------------------------------------------------------------------------------------------------------------|----------------------------------------------------|------|------------------------------------|----|----|----|
| Hausner D., Maemura Y., Matous P.                           | Exploring Internationally Operated Construction Projects through the Critical Incident Technique                     | Journal of management in engineering               | 2018 | 10.1061/(ASCE)ME.1943-5479.0000626 |    |    | X  |
| Havenvid M.I., Hulthén K., Linné Å., Sundquist V.           | Renewal in construction projects: tracing effects of client requirements                                             | Construction management and economics              | 2016 | 10.1080/01446193.2016.1208364      |    |    | X  |
| He Q., Luo L., Hu Y., Chan A.P.C.                           | Measuring the complexity of mega construction projects in China-A fuzzy analytic network process analysis            | International journal of project management        | 2015 | 10.1016/j.ijproman.2014.07.009     |    |    | X  |
| He Q., Wang G., Luo L., Shi Q., Xie J., Meng X.             | Mapping the managerial areas of Building Information Modeling (BIM) using scientometric analysis                     | International journal of project management        | 2017 | 10.1016/j.ijproman.2016.08.001     |    |    | X  |
| He, QH; Chen, XY; Wang, G; Zhu, J; Yang, DL; Liu, XX; Li, Y | Managing social responsibility for sustainability in megaprojects: An innovation transitions perspective on          | Journal of cleaner production                      | 2019 | 10.1016/j.jclepro.2019.118395      |    |    | X  |
| He, WW; Tang, WZ; Wei, YP; Duffield, CF; Lei, Z             | Evaluation of Cooperation during Project Delivery: Empirical Study on the Hydropower Industry in Southwest China     | Journal of construction engineering and management | 2016 | 10.1061/(ASCE)CO.1943-7862.0001044 |    |    | X  |
| He, ZQ; Huang, DC; Zhang, CZ; Fang, JM                      | Toward a Stakeholder Perspective on Social Stability Risk of Large Hydraulic Engineering Projects in China: A Social | Sustainability                                     | 2018 | 10.3390/su10041223                 |    |    | X  |

| Authors                                                       | Article Title                                                                                                                         | Source Title                                       | Year | DOI                                | C1 | C2 | C3 |
|---------------------------------------------------------------|---------------------------------------------------------------------------------------------------------------------------------------|----------------------------------------------------|------|------------------------------------|----|----|----|
| Heidari, MR; Heravi, G; Esmaeeli, AN                          | Integrating life-cycle assessment and life-cycle cost analysis to select sustainable pavement: A probabilistic model using managerial | Journal of cleaner production                      | 2020 | 10.1016/j.jclepro.2020.120046      |    |    | X  |
| Heigermoser D., García de Soto B., Abbott E.L.S., Chua D.K.H. | BIM-based Last Planner System tool for improving construction project management                                                      | Automation in construction                         | 2019 | 10.1016/j.autcon.2019.03.019       |    | X  | X  |
| Hellstrom, M; Wikstrom, R; Gustafsson, M; Luotola, H          | The value of project execution services: a problem and uncertainty perspective                                                        | Construction management and economics              | 2016 | 10.1080/01446193.2016.1151062      |    |    | X  |
| Heravi A., Coffey V., Trigunarsyah B.                         | Evaluating the level of stakeholder involvement during the project planning processes of building projects                            | International journal of project management        | 2015 | 10.1016/j.ijproman.2014.12.007     |    |    | X  |
| Heravi G., Charkhakan M.H.                                    | Predicting change by evaluating the change implementation process in construction projects using                                      | Journal of management in engineering               | 2015 | 10.1061/(ASCE)ME.1943-5479.0000325 |    |    | X  |
| Heravi G., Eslamdoost E.                                      | Applying Artificial Neural Networks for Measuring and Predicting Construction-Labor Productivity                                      | Journal of construction engineering and management | 2015 | 10.1061/(ASCE)CO.1943-7862.0001006 |    |    | X  |
| Heravi G., Fathi M., Faeghi S.                                | Evaluation of sustainability indicators of industrial buildings focused on petrochemical projects                                     | Journal of cleaner production                      | 2015 | 10.1016/j.jclepro.2015.06.133      |    | X  |    |

| Authors                                                                         | Article Title                                                                                                                                  | Source Title                                          | Year | DOI                                | C1 | C2 | C3 |
|---------------------------------------------------------------------------------|------------------------------------------------------------------------------------------------------------------------------------------------|-------------------------------------------------------|------|------------------------------------|----|----|----|
| Heravi G., Fathi M., Faeghi S.                                                  | Multi-criteria group decision-making method for optimal selection of sustainable industrial building options focused on petrochemical projects | Journal of cleaner production                         | 2017 | 10.1016/j.jclepro.2016.10.168      |    | X  | X  |
| Heravi G., Kebria M.F., Rostami M.                                              | Integrating the production and the erection processes of pre-fabricated steel frames in building projects using phased lean management         | Engineering construction and architectural management | 2019 | 10.1108/ECAM-03-2019-0133          |    |    | X  |
| Herazo, B; Lizarralde, G                                                        | The influence of green building certifications in collaboration and innovation                                                                 | Construction management and economics                 | 2015 | 10.1080/01446193.2015.1047879      |    |    | X  |
| Hernández J.L., Lerones P.M., Bonsma P., van Delft A., Deighton R., Braun J.-D. | An IFC interoperability framework for self-inspection process in buildings                                                                     | Buildings                                             | 2018 | 10.3390/buildings8020032           | X  |    |    |
| Herrera R.F., Mourgues C., Alarcón L.F., Pellicer E.                            | Understanding Interactions between Design Team Members of Construction Projects Using Social Network Analysis                                  | Journal of construction engineering and management    | 2020 | 10.1061/(ASCE)CO.1943-7862.0001841 |    |    | X  |
| Herrera, RF; Mourgues, C; Alarcon, LF; Pellicer, E                              | An Assessment of Lean Design Management Practices in Construction                                                                              | Sustainability                                        | 2020 | 10.3390/su12010019                 |    |    | X  |
| Herrera, RF; Sanz, MA; Montalban-Domingo, L; Garcia-Segura, T; Pellicer, E      | Impact of Game-Based Learning on Understanding Lean Construction Principles                                                                    | Sustainability                                        | 2019 | 10.3390/su11195294                 |    |    | X  |
| Hietajärvi A.-M., Aaltonen K.                                                   | The formation of a collaborative project identity in an infrastructure alliance                                                                | Construction management and economics                 | 2018 | 10.1080/01446193.2017.1315149      |    |    | X  |

| Authors                                                                                                                | Article Title                                                                                                                                                     | Source Title                                             | Year | DOI                                | C1 | C2 | C3 |
|------------------------------------------------------------------------------------------------------------------------|-------------------------------------------------------------------------------------------------------------------------------------------------------------------|----------------------------------------------------------|------|------------------------------------|----|----|----|
| Hijazi I., Isikdag U.,<br>Abunemeh M., Li X.,<br>Hashash M., El Meouche R.,<br>Hilali A., Charoenngam C.,<br>Barman A. | Mapping the processes of<br>donor-funded construction<br>projects                                                                                                 | Sustainability                                           | 2018 | 10.3390/su10072355                 | X  |    |    |
|                                                                                                                        | Barriers in contractual scope<br>management of international<br>development projects in<br>Afghanistan                                                            | Engineering construction and<br>architectural management | 2019 | 10.1108/ECAM-09-2017-0197          |    |    | X  |
| Hiyassat, MA; Alkasagi, F;<br>El-Mashaleh, M; Sweis, GJ                                                                | Risk allocation in public<br>construction projects: the<br>case of Jordan                                                                                         | International journal of<br>construction management      |      | 10.1080/15623599.2020.1728605      |    |    | X  |
| Hiyassat, MA; Hiyari, MA;<br>Sweis, GJ                                                                                 | Factors affecting construction<br>labour productivity: a case<br>study of Jordan                                                                                  | International journal of<br>construction management      | 2016 | 10.1080/15623599.2016.1142266      |    |    | X  |
| Hobbs, B; Besner, C                                                                                                    | Projects with internal vs.<br>external customers: An<br>empirical investigation of<br>variation in practice                                                       | International journal of<br>project management           | 2016 | 10.1016/j.ijproman.2016.02.010     |    |    | X  |
| Hodgson D.E., Paton S.                                                                                                 | Understanding the<br>professional project manager:<br>Cosmopolitans, locals and                                                                                   | International journal of<br>project management           | 2016 | 10.1016/j.ijproman.2015.03.003     |    |    | X  |
| Hoeber H., Alsem D.                                                                                                    | Life-cycle information<br>management using open-<br>standard BIM                                                                                                  | Engineering construction and<br>architectural management | 2016 | 10.1108/ECAM-01-2016-0023          |    |    | X  |
| Hofman, M; Spalek, S; Grela,<br>G                                                                                      | Shedding New Light on<br>Project Portfolio Risk                                                                                                                   | Sustainability                                           | 2017 | 10.3390/su9101798                  |    |    | X  |
| Holmstrom, J; Singh, V;<br>Framling, K                                                                                 | BIM as Infrastructure in a<br>Finnish HVAC Actor<br>Network: Enabling Adoption,<br>Reuse, and Recombination<br>over a Building Life Cycle<br>and between Projects | Journal of management in<br>engineering                  | 2015 | 10.1061/(ASCE)ME.1943-5479.0000305 |    |    | X  |

| Authors                                                 | Article Title                                                                                                           | Source Title                                          | Year | DOI                                | C1 | C2 | C3 |
|---------------------------------------------------------|-------------------------------------------------------------------------------------------------------------------------|-------------------------------------------------------|------|------------------------------------|----|----|----|
| Holt G.D., Goulding J.S., Akintoye A.                   | Enablers, challenges and relationships between research impact and theory                                               | Engineering construction and architectural management | 2016 | 10.1108/ECAM-12-2014-0161          |    |    | X  |
| Holt, GD                                                | Let's change tack, not wind direction: a response to Kog and Yaman (2016)                                               | Engineering construction and architectural management | 2018 | 10.1108/ECAM-02-2017-0019          |    |    | X  |
| Hong J., Shen G.Q., Mao C., Li Z., Li K.                | Life-cycle energy analysis of prefabricated building components: An input-output-based hybrid model                     | Journal of cleaner production                         | 2016 | 10.1016/j.jclepro.2015.10.030      |    |    | X  |
| Hong Y., Hammad A.W.A., Akbarnezhad A.                  | Impact of organization size and project type on BIM adoption in the Chinese                                             | Construction management and economics                 | 2019 | 10.1080/01446193.2019.1575515      |    |    | X  |
| Hong, JK; Shen, GQP; Li, ZD; Zhang, BY; Zhang, WQ       | Barriers to promoting prefabricated construction in China: A cost-benefit                                               | Journal of cleaner production                         | 2018 | 10.1016/j.jclepro.2017.10.171      |    |    | X  |
| Hong, Y; Hammad, A; Zhong, XY; Wang, BB; Akbarnezhad, A | Comparative Modeling Approach to Capture the Differences in BIM Adoption Decision-Making Process in Australia and China | Journal of construction engineering and management    | 2020 | 10.1061/(ASCE)CO.1943-7862.0001746 |    |    | X  |
| Hong, Y; Hammad, AWA; Sepasgozar, S; Akbarnezhad, A     | BIM adoption model for small and medium construction organisations in                                                   | Engineering construction and architectural management | 2019 | 10.1108/ECAM-04-2017-0064          | X  |    |    |
| Hopkin, T; Lu, SL; Sexton, M; Rogers, P                 | Learning from defects in the UK housing sector using action research A case study of a housing association              | Engineering construction and architectural management | 2019 | 10.1108/ECAM-04-2018-0146          |    |    | X  |
| Hoseini E., Bosch-Rekvelde M., Hertogh M.               | Cost contingency and cost involvement of construction projects in the preconstruction phase                             | Journal of construction engineering and management    | 2020 | 10.1061/(ASCE)CO.1943-7862.0001842 |    |    | X  |

| Authors                                                                                  | Article Title                                                                                                | Source Title                                       | Year | DOI                                | C1 | C2 | C3 |
|------------------------------------------------------------------------------------------|--------------------------------------------------------------------------------------------------------------|----------------------------------------------------|------|------------------------------------|----|----|----|
| Hoseini E., Van Veen P., Bosch-Rekvelde M., Hertogh M.                                   | Cost Performance and Cost Contingency during Project Execution: Comparing Client and Contractor Perspectives | Journal of management in engineering               | 2020 | 10.1061/(ASCE)ME.1943-5479.0000772 |    |    | X  |
| Hosny A., Nik-Bakht M., Moselhi O.                                                       | Workspace planning in construction: non-deterministic factors                                                | Automation in construction                         | 2020 | 10.1016/j.autcon.2020.103222       |    |    | X  |
| Hossain, MA; Raiymbekov, D; Nadeem, A; Kim, JR                                           | Delay causes in Kazakhstan's construction projects and remedial measures                                     | International journal of construction management   |      | 10.1080/15623599.2019.1647635      |    | X  |    |
| Hossain, MM; Ahmed, S                                                                    | Developing an automated safety checking system using BIM: a case study in the Bangladeshi construction       | International journal of construction management   |      | 10.1080/15623599.2019.1686833      |    |    | X  |
| Hosseini M.R., Banihashemi S., Martek I., Golizadeh H., Ghodoosi F.                      | Sustainable Delivery of Megaprojects in Iran: Integrated Model of                                            | Journal of management in engineering               | 2018 | 10.1061/(ASCE)ME.1943-5479.0000587 |    |    | X  |
| Hosseini M.R., Banihashemi S., Rameezdeen R., Golizadeh H., Arashpour M., Ma L.          | Sustainability by Information and Communication Technology: A paradigm shift for construction projects       | Journal of cleaner production                      | 2017 | 10.1016/j.jclepro.2017.08.200      |    |    | X  |
| Hosseini M.R., Martek I., Papadonikolaki E., Sheikhhoshkar M., Banihashemi S., Arashpour | Viability of the BIM Manager Enduring as a Distinct Role: Association Rule Mining of Job                     | Journal of construction engineering and management | 2018 | 10.1061/(ASCE)CO.1943-7862.0001542 |    |    | X  |
| Hosseini, MR; Edwards, DJ; Singh, T; Martek, I; Darko, A                                 | Engineering project networks: providing sustainable work systems for construction knowledge                  | Journal of engineering design and technology       |      | 10.1108/JEDT-12-2019-0343          | X  |    |    |
| Hosseini, MR; Parn, EA; Edwards, DJ; Papadonikolaki, E; Oraee, M                         | Roadmap to Mature BIM Use in Australian SMEs: Competitive Dynamics Perspective                               | Journal of management in engineering               | 2018 | 10.1061/(ASCE)ME.1943-5479.0000636 |    | X  | X  |



| Authors                                                         | Article Title                                                                               | Source Title                                          | Year | DOI                                | C1 | C2 | C3 |
|-----------------------------------------------------------------|---------------------------------------------------------------------------------------------|-------------------------------------------------------|------|------------------------------------|----|----|----|
| Hosseinian S.M., Carmichael D.G.                                | Optimal outcome sharing with a consortium of                                                | Journal of civil engineering and management           | 2016 | 10.3846/13923730.2014.914086       |    |    | X  |
| Hou L., Chi H.-L., Tarng W., Chai J., Panuwatwanich K., Wang X. | A framework of innovative learning for skill development in complex                         | Automation in construction                            | 2017 | 10.1016/j.autcon.2017.07.001       | X  |    |    |
| Hou X., Zeng Y., Xue J.                                         | Detecting Structural Components of Building Engineering Based on Deep-Learning Method       | Journal of construction engineering and management    | 2020 | 10.1061/(ASCE)CO.1943-7862.0001751 |    |    | X  |
| Hsiao, HF; Zhong, TY; Dincer, H                                 | Analysing Managers' Financial Motivation for Sustainable Investment                         | Sustainability                                        | 2019 | 10.3390/su11143849                 |    |    | X  |
| Hsu H.-C., Chang S., Chen C., Wu I.-C.                          | Knowledge-based system for resolving design clashes in building information models          | Automation in construction                            | 2020 | 10.1016/j.autcon.2019.103001       |    |    | X  |
| Hsu P.-Y., Aurisicchio M., Angeloudis P.                        | Risk-averse supply chain for modular construction projects                                  | Automation in construction                            | 2019 | 10.1016/j.autcon.2019.102898       |    |    | X  |
| Hsu P.-Y., Aurisicchio M., Angeloudis P., Whyte J.              | Understanding and visualizing schedule deviations in construction projects using fault tree | Engineering construction and architectural management | 2020 | 10.1108/ECAM-01-2020-0058          |    |    | X  |
| Hsu S.-C., Weng K.-W., Cui Q., Rand W.                          | Understanding the complexity of project team member selection through                       | International journal of project management           | 2016 | 10.1016/j.ijproman.2015.10.001     |    |    | X  |
| Hu D., Mohamed Y., Taghaddos H., Hermann U.                     | A simulation-based method for effective workplace planning of industrial                    | Construction management and economics                 | 2018 | 10.1080/01446193.2017.1390241      |    | X  | X  |
| Hu L., Wu H.                                                    | Exploratory study on risk management of state-owned construction enterprises in China       | Engineering construction and architectural management | 2016 | 10.1108/ECAM-05-2014-0064          |    |    | X  |

| Authors                                                         | Article Title                                                                                                                | Source Title                                          | Year | DOI                                | C1 | C2 | C3 |
|-----------------------------------------------------------------|------------------------------------------------------------------------------------------------------------------------------|-------------------------------------------------------|------|------------------------------------|----|----|----|
| Hu W., Zhong D., Wu B., Li Z.                                   | Construction phase oriented dynamic simulation: Taking RCC dam placement process as an example                               | Journal of civil engineering and management           | 2019 | 10.3846/jcem.2019.7948             |    |    | X  |
| Hu X., Chong H.-Y., Wang X.                                     | Sustainability perceptions of off-site manufacturing stakeholders in Australia                                               | Journal of cleaner production                         | 2019 | 10.1016/j.jclepro.2019.03.258      |    |    | X  |
| Hu X., Liu C.                                                   | Measuring efficiency, effectiveness and overall performance in the Chinese construction industry                             | Engineering construction and architectural management | 2018 | 10.1108/ECAM-06-2016-0131          |    |    | X  |
| Hu Y., Chan A.P.C., Le Y.                                       | Understanding the determinants of program organization for construction megaproject success: Case study of the Shanghai expo | Journal of management in engineering                  | 2015 | 10.1061/(ASCE)ME.1943-5479.0000310 |    |    | X  |
| Hu Y., Chan A.P.C., Le Y., Jin R.-Z.                            | From construction megaproject management to complex project management: Bibliographic                                        | Journal of management in engineering                  | 2015 | 10.1061/(ASCE)ME.1943-5479.0000254 |    |    | X  |
| Hu Y., Chan A.P.C., Le Y., Xu Y., Shan M.                       | Developing a program organization performance index for delivering construction megaprojects in China: Fuzzy synthetic       | Journal of management in engineering                  | 2016 | 10.1061/(ASCE)ME.1943-5479.0000432 |    |    | X  |
| Hu, X; Xia, B; Buys, L; Skitmore, M; Kennedy, R; Drogemuller, R | Stakeholder analysis of a retirement village development in Australia: insights from an                                      | International journal of construction management      | 2015 | 10.1080/15623599.2015.1094848      |    |    | X  |
| Hu, XC; Liu, CL                                                 | Total factor productivity measurement with carbon reduction                                                                  | Engineering construction and architectural management | 2017 | 10.1108/ECAM-06-2015-0097          |    |    | X  |

| Authors                                                | Article Title                                                                                                                               | Source Title                                          | Year | DOI                                | C1 | C2 | C3 |
|--------------------------------------------------------|---------------------------------------------------------------------------------------------------------------------------------------------|-------------------------------------------------------|------|------------------------------------|----|----|----|
| Huang, YH; Yang, TR                                    | Exploring On-Site Safety Knowledge Transfer in the Construction Industry                                                                    | Sustainability                                        | 2019 | 10.3390/su11226426                 |    |    | X  |
| Hueskes, M; Verhoest, K; Block, T                      | Governing public-private partnerships for sustainability An analysis of procurement and governance practices of PPP infrastructure projects | International journal of project management           | 2017 | 10.1016/j.ijproman.2017.02.020     |    |    | X  |
| Huh, JH; Park, JH                                      | Decrepit Building Monitoring Solution for Zero Energy Building Management Using PLC and Android                                             | Sustainability                                        | 2020 | 10.3390/su12051993                 |    |    | X  |
| Huo X., Yu A.T.W., Zezhou W., Jayantha W.M.            | Site planning and design of green residential building projects: case studies in                                                            | Engineering construction and architectural management | 2019 | 10.1108/ECAM-11-2018-0509          |    |    | X  |
| Huo, XS; Yu, ATW; Wu, ZZ                               | An empirical study of the variables affecting site planning and design in green                                                             | Journal of cleaner production                         | 2018 | 10.1016/j.jclepro.2017.12.091      |    |    | X  |
| Hussain, S; Zhu, FW; Ali, Z                            | Examining Influence of Construction Projects' Quality Factors on Client Satisfaction Using Partial Least Squares Structural                 | Journal of construction engineering and management    | 2019 | 10.1061/(ASCE)CO.1943-7862.0001655 |    |    | X  |
| Hussain, S; Zhu, FW; Siddiqi, AF; Ali, Z; Shabbir, MS  | Structural Equation Model for Evaluating Factors Affecting Quality of Social Infrastructure Projects                                        | Sustainability                                        | 2018 | 10.3390/su10051415                 |    |    | X  |
| Huynh, TTM; Dang, CN; Le-Hoai, L; Pham, AD; Nguyen, TD | Proposing a strategy map for coastal urban project success using the balanced scorecard method                                              | Engineering construction and architectural management |      | 10.1108/ECAM-11-2018-0527          |    |    | X  |

| Authors                              | Article Title                                                                                                | Source Title                                          | Year | DOI                                | C1 | C2 | C3 |
|--------------------------------------|--------------------------------------------------------------------------------------------------------------|-------------------------------------------------------|------|------------------------------------|----|----|----|
| Hwang B.-G., Ngo J., Her P.W.Y.      | Integrated Digital Delivery: Implementation status and project performance in the Singapore construction     | Journal of cleaner production                         | 2020 | 10.1016/j.jclepro.2020.121396      |    | X  | X  |
| Hwang B.-G., Shan M., Looi K.-Y.     | Key constraints and mitigation strategies for prefabricated prefinished volumetric construction              | Journal of cleaner production                         | 2018 | 10.1016/j.jclepro.2018.02.136      |    |    | X  |
| Hwang B.-G., Zhao X., Ong S.Y.       | Value management in singaporean building projects: Implementation status, critical success                   | Journal of management in engineering                  | 2015 | 10.1061/(ASCE)ME.1943-5479.0000342 |    |    | X  |
| Hwang B.-G., Zhao X., Tan L.L.G.     | Green building projects: Schedule performance, influential factors and                                       | Engineering construction and architectural management | 2015 | 10.1108/ECAM-07-2014-0095          |    |    | X  |
| Hwang B.-G., Zhao X., Yang K.W.      | Effect of BIM on Rework in Construction Projects in Singapore: Status Quo, Magnitude, Impact, and Strategies | Journal of construction engineering and management    | 2019 | 10.1061/(ASCE)CO.1943-7862.0001600 |    |    | X  |
| Hwang B.-G., Zhu L., Ming J.T.T.     | Factors Affecting Productivity in Green Building Construction                                                | Journal of management in engineering                  | 2017 | 10.1061/(ASCE)ME.1943-5479.0000499 |    |    | X  |
| Hwang S.                             | A Bayesian approach for forecasting errors of budget cost estimates                                          | Journal of civil engineering and management           | 2016 | 10.3846/13923730.2014.897981       |    |    | X  |
| Hwang S., Park M., Lee H.-S., Lee S. | Hybrid Simulation Framework for Immediate Facility Restoration Planning after a Catastrophic Disaster        | Journal of construction engineering and management    | 2016 | 10.1061/(ASCE)CO.1943-7862.0001146 |    |    | X  |

| Authors                             | Article Title                                                                                                                   | Source Title                                          | Year | DOI                           | C1 | C2 | C3 |
|-------------------------------------|---------------------------------------------------------------------------------------------------------------------------------|-------------------------------------------------------|------|-------------------------------|----|----|----|
| Hwang, BG; Shan, M; Looi, KY        | Knowledge-based decision support system for prefabricated prefinished volumetric construction                                   | Automation in construction                            | 2018 | 10.1016/j.autcon.2018.06.016  |    |    | X  |
| Hwang, BG; Shan, M; Phua, H; Chi, S | An Exploratory Analysis of Risks in Green Residential Building Construction Projects: The Case of                               | Sustainability                                        | 2017 | 10.3390/su9071116             |    |    | X  |
| Hwang, BG; Shan, M; Zhu, L; Lim, WC | Cost control in megaprojects: efficacy, tools and techniques, key knowledge areas and project                                   | International journal of construction management      | 2020 | 10.1080/15623599.2018.1484976 |    |    | X  |
| Hwang, BG; Zhao, XB; Chin, EWY      | International construction joint ventures between Singapore and developing countries Risk assessment and allocation preferences | Engineering construction and architectural management | 2017 | 10.1108/ECAM-03-2015-0035     |    |    | X  |
| Hwang, BG; Zhao, XJ; Lim, J         | Job satisfaction of project managers in green construction projects Influencing factors and                                     | Engineering construction and architectural management | 2020 | 10.1108/ECAM-10-2018-0451     |    |    | X  |
| Hwang, S                            | Framework for implementing integrated service-learning                                                                          | International journal of construction management      |      | 10.1080/15623599.2019.1689470 |    |    | X  |
| Hyung W.-G., Kim S., Jo J.-K.       | Improved similarity measure in case-based reasoning: a case study of construction cost estimation                               | Engineering construction and architectural management | 2019 | 10.1108/ECAM-01-2019-0035     |    |    | X  |
| Höök M., Stehn L., Brege S.         | The development of a portfolio of business models: a longitudinal case study of a building material company                     | Construction management and economics                 | 2015 | 10.1080/01446193.2015.1075052 |    |    | X  |

| Authors                                                               | Article Title                                                                                                               | Source Title                                       | Year | DOI                                | C1 | C2 | C3 |
|-----------------------------------------------------------------------|-----------------------------------------------------------------------------------------------------------------------------|----------------------------------------------------|------|------------------------------------|----|----|----|
| Ibrahim M.W., Hanna A.S., Russell J.S., Abotaleb I.S., El-Adaway I.H. | Comprehensive Analysis of Factors Associated with Out-of-Sequence Construction                                              | Journal of management in engineering               | 2020 | 10.1061/(ASCE)ME.1943-5479.0000777 |    |    | X  |
| Igwe C., Nasiri F., Hammad A.                                         | Construction workspace management: critical review and roadmap                                                              | International journal of construction management   | 2020 | 10.1080/15623599.2020.1756028      |    |    | X  |
| Ikediashi, DI; Ogwueleka, AC                                          | Assessing the use of ICT systems and their impact on construction project performance in the Nigerian construction industry | Journal of engineering design and technology       | 2016 | 10.1108/JEDT-08-2014-0047          | X  |    |    |
| Ilbeigi M., Castro-Lacouture D.                                       | Effects of Price-Adjustment Clauses on Number of Bidders and Dispersion of Bid Prices in Highway                            | Journal of management in engineering               | 2017 | 10.1061/(ASCE)ME.1943-5479.0000533 |    |    | X  |
| Ilbeigi M., Dilkina B.                                                | Statistical Approach to Quantifying the Destructive Impact of Natural Disasters on Petroleum Infrastructures                | Journal of management in engineering               | 2018 | 10.1061/(ASCE)ME.1943-5479.0000566 |    |    | X  |
| Inayat A., Melhem H., Esmaily A.                                      | Critical success factors in an agency construction management environment                                                   | Journal of construction engineering and management | 2015 | 10.1061/(ASCE)CO.1943-7862.0000921 |    |    | X  |
| Ingirige, B                                                           | Theorizing construction industry practice within a disaster risk reduction setting: is it a panacea or an                   | Construction management and economics              | 2016 | 10.1080/01446193.2016.1200735      |    |    | X  |
| Ingle P.V., Mahesh G.                                                 | Construction project performance areas for Indian construction projects                                                     | International journal of construction management   | 2020 | 10.1080/15623599.2020.1721177      |    |    | X  |

| Authors                                                    | Article Title                                                                                                                        | Source Title                                          | Year | DOI                                | C1 | C2 | C3 |
|------------------------------------------------------------|--------------------------------------------------------------------------------------------------------------------------------------|-------------------------------------------------------|------|------------------------------------|----|----|----|
| Invernizzi D.C., Locatelli G.,<br>Brookes N.J.             | Characterising nuclear decommissioning projects: an investigation of the project characteristics that affect the project performance | Construction management and economics                 | 2020 | 10.1080/01446193.2020.1775859      |    |    | X  |
| Invernizzi, DC; Locatelli, G;<br>Gronqvist, M; Brookes, NJ | Applying value management when it seems that there is no value to be managed: the case of nuclear decommissioning                    | International journal of project management           | 2019 | 10.1016/j.ijproman.2019.01.004     |    |    | X  |
| Inyim, P; Rivera, J; Zhu, YM                               | Integration of Building Information Modeling and Economic and Environmental Impact Analysis to Support Sustainable Building Design   | Journal of management in engineering                  | 2015 | 10.1061/(ASCE)ME.1943-5479.0000308 | X  |    |    |
| Inyim, P; Zhu, YM; Orabi, W                                | Analysis of Time, Cost, and Environmental Impact Relationships at the Building-Material Level                                        | Journal of management in engineering                  | 2016 | 10.1061/(ASCE)ME.1943-5479.0000430 |    |    | X  |
| Iorio J., Taylor J.E.                                      | Precursors to engaged leaders in virtual project teams                                                                               | International journal of project management           | 2015 | 10.1016/j.ijproman.2014.06.007     |    |    | X  |
| Irfan M., Malik M.S.A., Kaka<br>Khel S.S.U.H.              | Effect of factors of organizational structure influencing nonphysical waste in road projects of developing countries                 | Engineering construction and architectural management | 2020 | 10.1108/ECAM-06-2019-0327          |    |    | X  |
| Irizarry, J; Costa, DB                                     | Exploratory Study of Potential Applications of Unmanned Aerial Systems for Construction                                              | Journal of management in engineering                  | 2016 | 10.1061/(ASCE)ME.1943-5479.0000422 |    |    | X  |
| Isaac S., Bock T., Stoliar Y.                              | A methodology for the optimal modularization of                                                                                      | Automation in construction                            | 2016 | 10.1016/j.autcon.2015.12.017       |    | X  | X  |
| Isaac, S; Curreli, M; Stoliar,                             | Work packaging with BIM                                                                                                              | Automation in construction                            | 2017 | 10.1016/j.autcon.2017.08.030       |    |    | X  |

| Authors                                 | Article Title                                                                                                                                        | Source Title                                          | Year | DOI                                | C1 | C2 | C3 |
|-----------------------------------------|------------------------------------------------------------------------------------------------------------------------------------------------------|-------------------------------------------------------|------|------------------------------------|----|----|----|
| Isatto E.L., Azambuja M., Formoso C.T.  | The role of commitments in the management of construction make-to-order                                                                              | Journal of management in engineering                  | 2015 | 10.1061/(ASCE)ME.1943-5479.0000253 | X  |    | X  |
| Isik, Z; Aladag, H                      | A fuzzy AHP model to assess sustainable performance of the construction industry from urban regeneration                                             | Journal of civil engineering and management           | 2017 | 10.3846/13923730.2016.1210219      |    |    | X  |
| Iskandar K.A., Hanna A.S., Lotfallah W. | Modeling the performance of healthcare construction                                                                                                  | Engineering construction and architectural management | 2019 | 10.1108/ECAM-08-2018-0323          |    |    | X  |
| Islam, MS; Nepal, MP; Skitmore, M       | Modified Fuzzy Group Decision-Making Approach to Cost Overrun Risk Assessment of Power Plant                                                         | Journal of construction engineering and management    | 2019 | 10.1061/(ASCE)CO.1943-7862.0001593 |    |    | X  |
| Ismael, D; Shealy, T                    | Sustainable Construction Risk Perceptions in the Kuwaiti Construction                                                                                | Sustainability                                        | 2018 | 10.3390/su10061854                 |    |    | X  |
| Issa R.R.A., Olbina S., Zuppa D.        | Model for developing trust on US construction projects                                                                                               | Built environment project and asset management        | 2018 | 10.1108/BEPAM-03-2017-0017         |    |    | X  |
| Iuorio, O; Wallace, A; Simpson, K       | Prefabs in the North of England: Technological, Environmental and Social                                                                             | Sustainability                                        | 2019 | 10.3390/su11143884                 |    | X  |    |
| Ivory C.                                | The prospects for a production management body of knowledge in business schools: response to Koskela (2017) "Why is management research irrelevant?" | Construction management and economics                 | 2017 | 10.1080/01446193.2017.1323111      |    | X  | X  |
| Iyer K.C., Kumar R., Singh S.P.         | Understanding the role of contractor capability in risk management: a comparative case study of two similar projects                                 | Construction management and economics                 | 2020 | 10.1080/01446193.2019.1590614      |    |    | X  |



| Authors                                        | Article Title                                                                                                                                                                  | Source Title                                          | Year | DOI                            | C1 | C2 | C3 |
|------------------------------------------------|--------------------------------------------------------------------------------------------------------------------------------------------------------------------------------|-------------------------------------------------------|------|--------------------------------|----|----|----|
| Iyer, KC; Banerjee, PS                         | Measuring and benchmarking managerial efficiency of project execution schedule                                                                                                 | International journal of project management           | 2016 | 10.1016/j.ijproman.2015.10.008 |    |    | X  |
| Jaafar, M; Nuruddin, AR; Abu Bakar, SPS        | Managerial capabilities of housing developers: building the competitive advantage of                                                                                           | International journal of construction management      | 2016 | 10.1080/15623599.2015.1117708  |    |    | X  |
| Jacobsson M., Linderöth H.C.J., Rowlinson S.   | The role of industry: an analytical framework to understand ICT transformation within the                                                                                      | Construction management and economics                 | 2017 | 10.1080/01446193.2017.1315148  | X  |    | X  |
| Jaeger M., Yu G., Adair D.                     | Organisational culture of Chinese construction organisations in Kuwait                                                                                                         | Engineering construction and architectural management | 2017 | 10.1108/ECAM-07-2016-0157      |    |    | X  |
| Jafari P., Mohamed E., Lee S., Abourizk S.     | Social network analysis of change management processes for communication                                                                                                       | Automation in construction                            | 2020 | 10.1016/j.autcon.2020.103292   |    | X  | X  |
| Jalal M.P., Shoar S.                           | A hybrid SD-DEMATEL approach to develop a delay model for construction                                                                                                         | Engineering construction and architectural management | 2017 | 10.1108/ECAM-02-2016-0056      |    |    | X  |
| Jalal, MP; Koosha, SM                          | Identifying organizational variables affecting project management office characteristics and analyzing their correlations in the Iranian project-oriented organizations of the | International journal of project management           | 2015 | 10.1016/j.ijproman.2014.06.010 |    |    | X  |
| Jalali A., Hidzir N.I., Jaafar M., Dahalan N.  | Factors that trigger bullying amongst subcontractors toward intention to quit in the construction projects                                                                     | Built environment project and asset management        | 2019 | 10.1108/BEPAM-01-2019-0001     |    |    | X  |
| Jalali Yazdi A., Maghrebi M., Bolouri Bazaz J. | Mathematical model to optimally solve the lift planning problem in high-rise                                                                                                   | Automation in construction                            | 2018 | 10.1016/j.autcon.2018.03.029   |    |    | X  |

| Authors                                                    | Article Title                                                                                                    | Source Title                                       | Year | DOI                                | C1 | C2 | C3 |
|------------------------------------------------------------|------------------------------------------------------------------------------------------------------------------|----------------------------------------------------|------|------------------------------------|----|----|----|
| Jamshidieini, B; Rezaie, K; Firuzabad, MF                  | Cleaner distribution of electricity energy considering Personnel's attitudes toward waste generation             | Journal of cleaner production                      | 2019 | 10.1016/j.jclepro.2018.10.232      |    |    | X  |
| Jang S., Jeong Y., Lee G., Kang Y.                         | Enhancing Subcontractors' Participation in BIM-Based Design Coordination under a DBB Contract                    | Journal of management in engineering               | 2019 | 10.1061/(ASCE)ME.1943-5479.0000714 |    |    | X  |
| Jang, S; Lee, G                                            | Process, productivity, and economic analyses of BIM based multi-trade prefabrication-A case study                | Automation in construction                         | 2018 | 10.1016/j.autcon.2017.12.035       |    |    | X  |
| Jarkas A.M.                                                | Factors influencing labour productivity in Bahrain's construction industry                                       | International journal of construction management   | 2015 | 10.1080/15623599.2015.1012143      |    |    | X  |
| Jaselskis, E; Sankar, A; Yousif, A; Clark, B; Chinta, V    | Using Telepresence for Real-Time Monitoring of Construction Operations                                           | Journal of management in engineering               | 2015 | 10.1061/(ASCE)ME.1943-5479.0000336 |    |    | X  |
| Jaskowski P., Biruk S.                                     | Reducing renewable resource demand fluctuation using soft precedence relations in project scheduling             | Journal of civil engineering and management        | 2018 | 10.3846/jcem.2018.3043             |    |    | X  |
| Jaśkowski P., Sobotka A., Czarnigowska A.                  | Decision model for planning material supply channels in construction                                             | Automation in construction                         | 2018 | 10.1016/j.autcon.2018.02.026       |    |    | X  |
| Javanmardi A., Abbasian-Hosseini S.A., Liu M., Hsiang S.M. | Improving Effectiveness of Constraints Removal in Construction Planning Meetings: Information-Theoretic Approach | Journal of construction engineering and management | 2020 | 10.1061/(ASCE)CO.1943-7862.0001790 |    |    | X  |
| Jeelani I., Albert A., Gambatese J.A.                      | Why Do Construction Hazards Remain Unrecognized at the Work                                                      | Journal of construction engineering and management | 2017 | 10.1061/(ASCE)CO.1943-7862.0001274 |    |    | X  |

| Authors                                 | Article Title                                                                                                            | Source Title                                       | Year | DOI                                | C1 | C2 | C3 |
|-----------------------------------------|--------------------------------------------------------------------------------------------------------------------------|----------------------------------------------------|------|------------------------------------|----|----|----|
| Jelodar M.B., Yiu T.W., Wilkinson S.    | A conceptualisation of relationship quality in construction procurement                                                  | International journal of project management        | 2016 | 10.1016/j.ijproman.2016.03.005     |    |    | X  |
| Jelodar, MB; Yiu, TW; Wilkinson, S      | Relationship-Quality Judgment Model for Construction Project Procurement: A Conjoint                                     | Journal of construction engineering and management | 2016 | 10.1061/(ASCE)CO.1943-7862.0001104 |    |    | X  |
| Jelodar, MB; Yiu, TW; Wilkinson, S      | Assessing Contractual Relationship Quality: Study of Judgment Trends among Construction Industry Participants            | Journal of management in engineering               | 2017 | 10.1061/(ASCE)ME.1943-5479.0000461 |    | X  |    |
| Jeong M., Lee G.                        | Quantitative model for predicting the referential intention of construction management services                          | Journal of management in engineering               | 2015 | 10.1061/(ASCE)ME.1943-5479.0000333 |    |    | X  |
| Jeong, W; Chang, S; Son, J; Yi, JS      | BIM-Integrated Construction Operation Simulation for Just-In-Time Production                                             | Sustainability                                     | 2016 | 10.3390/su8111106                  |    |    | X  |
| Jepson J., Kirytopoulos K., Chileshe N. | Isomorphism within risk-management practices of the Australian construction                                              | International journal of construction management   | 2020 | 10.1080/15623599.2020.1728608      |    |    | X  |
| Ji T., Wei H.-H., Chen J.               | Understanding the effect of co-worker support on construction safety performance from the perspective of risk theory: An | Journal of civil engineering and management        | 2018 | 10.3846/jcem.2019.7642             |    |    | X  |
| Ji W., Abourizk S.M.                    | Data-Driven Simulation Model for Quality-Induced Rework Cost Estimation and Control Using Absorbing Markov Chains        | Journal of construction engineering and management | 2018 | 10.1061/(ASCE)CO.1943-7862.0001534 |    | X  | X  |

| Authors                                                     | Article Title                                                                                                                                     | Source Title                                          | Year | DOI                                | C1 | C2 | C3 |
|-------------------------------------------------------------|---------------------------------------------------------------------------------------------------------------------------------------------------|-------------------------------------------------------|------|------------------------------------|----|----|----|
| Ji W., Li Y., AbouRizk S.M.                                 | Integrated data-driven approach for analyzing pipe welding operator-quality                                                                       | Automation in construction                            | 2019 | 10.1016/j.autcon.2019.04.009       |    | X  | X  |
| Jia A.Y., Rowlinson S., Loosemore M., Xu M., Li B., Gibb A. | Institutions and institutional logics in construction safety management: the case of climatic heat stress                                         | Construction management and economics                 | 2017 | 10.1080/01446193.2017.1296171      |    |    | X  |
| Jia M., Komeily A., Wang Y., Srinivasan R.S.                | Adopting Internet of Things for the development of smart buildings: A review of enabling technologies and                                         | Automation in construction                            | 2019 | 10.1016/j.autcon.2019.01.023       |    | X  | X  |
| Jia, L; Qian, QK; Meijer, F; Visscher, H                    | Stakeholders' Risk Perception: A Perspective for Proactive Risk Management in Residential Building                                                | Sustainability                                        | 2020 | 10.3390/su12072832                 |    |    | X  |
| Jiang H., Lin P., Qiang M.                                  | Energy Retrofits in China Public-opinion sentiment analysis for large hydro                                                                       | Journal of construction engineering and management    | 2016 | 10.1061/(ASCE)CO.1943-7862.0001039 |    |    | X  |
| Jiang H., Lin P., Qiang M., Fan Q.                          | A labor consumption measurement system based on real-time tracking technology for dam                                                             | Automation in construction                            | 2015 | 10.1016/j.autcon.2015.02.004       |    |    | X  |
| Jiang T., An X., Minchin R.E., Li S.                        | Application of Discrete-Event Simulation in the Quantitative Evaluation of Information Systems in Infrastructure Maintenance Management Processes | Journal of management in engineering                  | 2016 | 10.1061/(ASCE)ME.1943-5479.0000403 |    |    | X  |
| Jiang W., Ding L., Zhou C.                                  | Cyber physical system for safety management in smart construction site                                                                            | Engineering construction and architectural management | 2020 | 10.1108/ECAM-10-2019-0578          | X  |    | X  |

| Authors                                                     | Article Title                                                                                                                                              | Source Title                                          | Year | DOI                                | C1 | C2 | C3 |
|-------------------------------------------------------------|------------------------------------------------------------------------------------------------------------------------------------------------------------|-------------------------------------------------------|------|------------------------------------|----|----|----|
| Jiang W., Lu Y.                                             | Influence of initial trust on control from client perspective: Construction                                                                                | Engineering construction and architectural management | 2017 | 10.1108/ECAM-11-2015-0180          |    |    | X  |
| Jiang W., Lu Y., Le Y.                                      | Trust and Project Success: A Twofold Perspective between Owners and Contractors                                                                            | Journal of management in engineering                  | 2016 | 10.1061/(ASCE)ME.1943-5479.0000469 |    |    | X  |
| Jiang Z., Fang D., Zhang M.                                 | Understanding the causation of construction workers' unsafe behaviors based on system dynamics modeling                                                    | Journal of management in engineering                  | 2015 | 10.1061/(ASCE)ME.1943-5479.0000350 |    |    | X  |
| Jiang, WL; Martek, I; Hosseini, MR; Chen, C                 | Political risk management of foreign direct investment in infrastructure projects<br>Bibliometric-qualitative analyses of research in developing countries | Engineering construction and architectural management |      | 10.1108/ECAM-05-2019-0270          |    |    | X  |
| Jiang, WP; Luo, LR; Wu, ZZ; Fei, JB; Antwi-Afari, MF; Yu, T | An Investigation of the Effectiveness of Prefabrication Incentive                                                                                          | Sustainability                                        | 2019 | 10.3390/su11195149                 |    |    | X  |
| Jiang, WP; Zhao, XB                                         | Trust and the intent to cooperate in energy performance contracting for public buildings in China                                                          | Engineering construction and architectural management |      | 10.1108/ECAM-07-2019-0385          |    |    | X  |
| Jiang, WP; Zhao, XB; Ni, JB                                 | The Impact of Transformational Leadership on Employee Sustainable Performance: The Mediating Role of Organizational Citizenship Behavior                   | Sustainability                                        | 2017 | 10.3390/su9091567                  |    |    | X  |
| Jiang, WP; Zhao, XB; Zuo, J                                 | (Dis)Trust, Control, and Project Success: From a Chinese Project Owner's                                                                                   | Sustainability                                        | 2017 | 10.3390/su9111936                  |    |    | X  |

| Authors                                                                               | Article Title                                                                                                                                 | Source Title                                             | Year | DOI                                | C1 | C2 | C3 |
|---------------------------------------------------------------------------------------|-----------------------------------------------------------------------------------------------------------------------------------------------|----------------------------------------------------------|------|------------------------------------|----|----|----|
| Jiang, XY; Lu, K; Xia, B;<br>Liu, Y; Cui, CY                                          | Identifying Significant Risks<br>and Analyzing Risk<br>Relationship for Construction<br>PPP Projects in China Using<br>Integrated FISM-MICMAC | Sustainability                                           | 2019 | 10.3390/su11195206                 |    |    | X  |
| Jimenez-Rivero, A; de<br>Guzman-Baez, A; Garcia-<br>Navarro, J                        | Enhanced On-Site Waste<br>Management of Plasterboard<br>in Construction Works: A<br>Case Study in Spain                                       | Sustainability                                           | 2017 | 10.3390/su9030450                  |    |    | X  |
| Jin R., Han S., Hyun C., Cha<br>Y.                                                    | Application of case-based<br>reasoning for estimating<br>preliminary duration of<br>building projects                                         | Journal of construction<br>engineering and management    | 2016 | 10.1061/(ASCE)CO.1943-7862.0001072 |    |    | X  |
| Jin R., Hancock C.M., Tang<br>L., Wanatowski D.                                       | BIM Investment, Returns,<br>and Risks in China's AEC                                                                                          | Journal of construction<br>engineering and management    | 2017 | 10.1061/(ASCE)CO.1943-7862.0001408 | X  |    |    |
| Jin R., Li B., Zhou T.,<br>Wanatowski D., Piroozfar P.                                | An empirical study of<br>perceptions towards<br>construction and demolition<br>waste recycling and reuse in<br>China                          | Resources, conservation and<br>recycling                 | 2017 | 10.1016/j.resconrec.2017.07.034    |    | X  |    |
| Jin R., Yang T., Piroozfar P.,<br>Kang B.-G., Wanatowski D.,<br>Hancock C.M., Tang L. | Project-based pedagogy in<br>interdisciplinary building<br>design adopting BIM                                                                | Engineering construction and<br>architectural management | 2018 | 10.1108/ECAM-07-2017-0119          | X  | X  | X  |
| Jin R., Zhang H., Liu D., Yan<br>X.                                                   | IoT-based detecting, locating<br>and alarming of unauthorized<br>intrusion on construction                                                    | Automation in construction                               | 2020 | 10.1016/j.autcon.2020.103278       |    |    | X  |
| Jin R., Zuo J., Hong J.                                                               | Scientometric review of<br>articles published in ASCE's<br>journal of construction<br>engineering and management                              | Journal of construction<br>engineering and management    | 2019 | 10.1061/(ASCE)CO.1943-7862.0001682 | X  |    | X  |
| Jin Z., Gambatese J., Liu D.,<br>Dharmapalan V.                                       | Using 4D BIM to assess<br>construction risks during the<br>design phase                                                                       | Engineering construction and<br>architectural management | 2019 | 10.1108/ECAM-09-2018-0379          |    |    | X  |

| Authors                                  | Article Title                                                                                                                                        | Source Title                                       | Year | DOI                                | C1 | C2 | C3 |
|------------------------------------------|------------------------------------------------------------------------------------------------------------------------------------------------------|----------------------------------------------------|------|------------------------------------|----|----|----|
| Jin, HY; Shen, LY; Wang, Z               | Mapping the Influence of Project Management on Project Cost                                                                                          | KSCE journal of civil engineering                  | 2018 | 10.1007/s12205-018-0397-8          |    | X  |    |
| Jo H., Lee H., Suh Y., Kim J., Park Y.   | A dynamic feasibility analysis of public investment projects: An integrated approach using system dynamics and agent-based                           | International journal of project management        | 2015 | 10.1016/j.ijproman.2015.07.002     |    |    | X  |
| Jo, SH; Lee, EB; Pyo, KY                 | Integrating a Procurement Management Process into Critical Chain Project Management (CCPM): A Case-Study on Oil and Gas Projects, the Piping Process | Sustainability                                     | 2018 | 10.3390/su10061817                 |    |    | X  |
| Jobidon, G; Lemieux, P; Beauregard, R    | Implementation of Integrated Project Delivery in Quebec's Procurement for Public Infrastructure: A Comparative and Relational                        | Sustainability                                     | 2018 | 10.3390/su10082648                 |    |    | X  |
| Jordan Srour F., Kiomjian D., Srour I.M. | Automating the Use of Learning Curve Models in Construction Task Duration                                                                            | Journal of construction engineering and management | 2018 | 10.1061/(ASCE)CO.1943-7862.0001515 |    |    | X  |
| Jordanour F., Kiomjian D., Srour I.M.    | Learning Curves in Construction: A Critical Review and New Model                                                                                     | Journal of construction engineering and management | 2016 | 10.1061/(ASCE)CO.1943-7862.0001096 |    |    | X  |
| Joseph Garcia A., Mollaoglu S.           | Individuals' Capacities to Apply Transferred Knowledge in AEC Project                                                                                | Journal of construction engineering and management | 2020 | 10.1061/(ASCE)CO.1943-7862.0001791 |    |    | X  |
| Joslin, R; Muller, R                     | Identifying interesting project phenomena using philosophical and                                                                                    | International journal of project management        | 2016 | 10.1016/j.ijproman.2016.05.005     |    |    | X  |

| Authors                                   | Article Title                                                                                                               | Source Title                                          | Year | DOI                                | C1 | C2 | C3 |
|-------------------------------------------|-----------------------------------------------------------------------------------------------------------------------------|-------------------------------------------------------|------|------------------------------------|----|----|----|
| Ju Q., Ding L., Skibniewski M.J.          | Optimization strategies to eliminate interface conflicts in complex supply chains of construction projects                  | Journal of civil engineering and management           | 2017 | 10.3846/13923730.2016.1232305      |    |    | X  |
| Ju, QQ; Ding, LY                          | A Web-Based System for Interface Management of Metro Equipment                                                              | Journal of intelligent and robotic systems            | 2015 | 10.1007/s10846-014-0121-y          |    | X  |    |
| Juan Y.-K., Lin I.-C., Tsai J.-X.         | A hybrid approach to optimize initial design strategies for pre-sale                                                        | Engineering construction and architectural management | 2019 | 10.1108/ECAM-04-2018-0187          |    |    | X  |
| Jung W., Han S.H.                         | Which Risk Management Is Most Crucial for Controlling Project Cost?                                                         | Journal of management in engineering                  | 2017 | 10.1061/(ASCE)ME.1943-5479.0000547 |    |    | X  |
| Jung, M; You, S; Chi, S; Yu, I; Hwang, BG | The Relationship between Unbilled Accounts Receivable and Financial Performance of Construction                             | Sustainability                                        | 2018 | 10.3390/su10082679                 |    |    | X  |
| Juszczyk M., Zima K., Lelek W.            | Forecasting of sports fields construction costs aided by ensembles of neural networks                                       | Journal of civil engineering and management           | 2019 | 10.3846/jcem.2019.10534            |    |    | X  |
| Kabiri S., Hughes W.                      | The interplay between formal and informal elements in analysing situations of role conflict among construction participants | Construction management and economics                 | 2018 | 10.1080/01446193.2018.1472794      |    |    | X  |
| Kadry M., Osman H., Georgy M.             | Causes of Construction Delays in Countries with High Geopolitical Risks                                                     | Journal of construction engineering and management    | 2017 | 10.1061/(ASCE)CO.1943-7862.0001222 |    |    | X  |
| Kaewunruen S., Lian Q.                    | Digital twin aided sustainability-based lifecycle management for railway                                                    | Journal of cleaner production                         | 2019 | 10.1016/j.jclepro.2019.04.156      |    |    | X  |



| Authors                                      | Article Title                                                                                                                           | Source Title                                          | Year | DOI                                | C1 | C2 | C3 |
|----------------------------------------------|-----------------------------------------------------------------------------------------------------------------------------------------|-------------------------------------------------------|------|------------------------------------|----|----|----|
| Kaewunruen, S;<br>Sresakoolchai, J; Zhou, ZH | Sustainability-Based<br>Lifecycle Management for<br>Bridge Infrastructure Using                                                         | Sustainability                                        | 2020 | 10.3390/su12062436                 |    |    | X  |
| Kaiser M.G., El Arbi F.,<br>Ahlemann F.      | Successful project portfolio<br>management beyond project<br>selection techniques:<br>Understanding the role of<br>structural alignment | International journal of<br>project management        | 2015 | 10.1016/j.ijproman.2014.03.002     |    |    | X  |
| Kalasapudi V.S., Tang P.,<br>Turkan Y.       | Computationally efficient<br>change analysis of piece-wise<br>cylindrical building elements<br>for proactive project control            | Automation in construction                            | 2017 | 10.1016/j.autcon.2017.04.001       |    |    | X  |
| Kam C., Song M.H.,<br>Senaratna D.           | VDC Scorecard:<br>Formulation, application, and                                                                                         | Journal of construction<br>engineering and management | 2017 | 10.1061/(ASCE)CO.1943-7862.0001233 |    |    | X  |
| Kamal A., Abas M., Khan D.,<br>Azfar R.W.    | Risk factors influencing the<br>building projects in Pakistan:<br>from perspective of<br>contractors, clients and                       | International journal of<br>construction management   | 2019 | 10.1080/15623599.2019.1683693      |    |    | X  |
| Kamara J.M.                                  | Maintaining focus on clients'<br>requirements using the DQI<br>tool: Towards a requirements-<br>oriented project process                | Built environment project<br>and asset management     | 2017 | 10.1108/BEPAM-09-2016-0044         |    |    | X  |
| Kaminsky J.                                  | The global influence of<br>national cultural values on<br>construction permitting                                                       | Construction management<br>and economics              | 2019 | 10.1080/01446193.2018.1506140      |    |    | X  |
| Kaminsky, J; Javernick-Will,<br>A            | Theorizing the Internal Social<br>Sustainability of Sanitation<br>Organizations                                                         | Journal of construction<br>engineering and management | 2015 | 10.1061/(ASCE)CO.1943-7862.0000933 |    |    | X  |
| Kang Y.                                      | Use of Fall Protection in the<br>US Construction Industry                                                                               | Journal of management in<br>engineering               | 2018 | 10.1061/(ASCE)ME.1943-5479.0000655 |    |    | X  |
| Kang Y., Jin Z., Hyun C.,<br>Park H.         | Construction Management<br>Functions for Developing<br>Countries: Case of Cambodia                                                      | Journal of management in<br>engineering               | 2018 | 10.1061/(ASCE)ME.1943-5479.0000609 |    |    | X  |

| Authors                                                        | Article Title                                                                                                       | Source Title                                          | Year | DOI                                | C1 | C2 | C3 |
|----------------------------------------------------------------|---------------------------------------------------------------------------------------------------------------------|-------------------------------------------------------|------|------------------------------------|----|----|----|
| Kang Y., O'Brien W.J., O'Connor J.T.                           | Information-integration maturity model for the capital projects industry                                            | Journal of management in engineering                  | 2015 | 10.1061/(ASCE)ME.1943-5479.0000274 |    |    | X  |
| Kang Y., Siddiqui S., Suk S.J., Chi S., Kim C.                 | Trends of Fall Accidents in the U.S. Construction                                                                   | Journal of construction engineering and management    | 2017 | 10.1061/(ASCE)CO.1943-7862.0001332 |    |    | X  |
| Kang, LS; Kim, HS; Moon, HS; Kim, SK                           | Managing construction schedule by telepresence: Integration of site video feed with an active nD CAD                | Automation in construction                            | 2016 | 10.1016/j.autcon.2016.04.003       | X  |    | X  |
| Kannimuthu M., Raphael B., Ekambaram P., Kuppuswamy A.         | Comparing optimization modeling approaches for the multi-mode resource-constrained multi-project scheduling problem | Engineering construction and architectural management | 2019 | 10.1108/ECAM-03-2019-0156          |    |    | X  |
| Kantor I., Betancourt A., Elkamel A., Fowler M., Almansoori A. | Generalized mixed-integer nonlinear programming modeling of eco-industrial networks to reduce cost and              | Journal of cleaner production                         | 2015 | 10.1016/j.jclepro.2015.03.017      |    | X  |    |
| Kapogiannis G., Sherratt F.                                    | Impact of integrated collaborative technologies to form a collaborative culture in construction projects            | Built environment project and asset management        | 2018 | 10.1108/BEPAM-07-2017-0043         |    |    | X  |
| Kar S., Jha K.N.                                               | Assessing criticality of construction materials for prioritizing their procurement using ANP-TOPSIS                 | International journal of construction management      | 2020 | 10.1080/15623599.2020.1742637      |    |    | X  |
| Karakhan A.A., Gambatese J.A.                                  | Integrating Worker Health and Safety into Sustainable Design and Construction: Designer and Constructor             | Journal of construction engineering and management    | 2017 | 10.1061/(ASCE)CO.1943-7862.0001379 |    |    | X  |

| Authors                                                          | Article Title                                                                                                                     | Source Title                                          | Year | DOI                                | C1 | C2 | C3 |
|------------------------------------------------------------------|-----------------------------------------------------------------------------------------------------------------------------------|-------------------------------------------------------|------|------------------------------------|----|----|----|
| Karakhan A.A., Gambatese J.A.                                    | Identification, quantification, and classification of potential safety risk for sustainable construction in the United            | Journal of construction engineering and management    | 2017 | 10.1061/(ASCE)CO.1943-7862.0001302 |    | X  |    |
| Karami H., Olatunji O.A.                                         | Critical overrun causations in marine projects                                                                                    | Engineering construction and architectural management | 2020 | 10.1108/ECAM-09-2019-0477          |    |    | X  |
| Karamoozian, A; Wu, DS                                           | A hybrid risk prioritization approach in construction projects using failure mode and effective analysis                          | Engineering construction and architectural management |      | 10.1108/ECAM-10-2019-0535          |    |    | X  |
| Karan, EP; Irizarry, J                                           | Extending BIM interoperability to preconstruction operations using geospatial analyses and                                        | Automation in construction                            | 2015 | 10.1016/j.autcon.2015.02.012       |    |    | X  |
| Karimi H., Taghaddos H.                                          | Impact of Age on the Strength of Experience and Education Role in Fatal Injuries Prevention in Iranian Construction Craft Workers | Journal of construction engineering and management    | 2020 | 10.1061/(ASCE)CO.1943-7862.0001857 |    |    | X  |
| Karimi H., Taylor T.R.B., Dadi G.B., Goodrum P.M., Srinivasan C. | Impact of Skilled Labor Availability on Construction Project Cost Performance                                                     | Journal of construction engineering and management    | 2018 | 10.1061/(ASCE)CO.1943-7862.0001512 |    |    | X  |
| Karimi H., Taylor T.R.B., Goodrum P.M., Srinivasan C.            | Quantitative analysis of the impact of craft worker availability on construction project safety performance                       | Construction innovation                               | 2016 | 10.1108/CI-10-2015-0050            |    | X  |    |
| Karimi, H; Taylor, TRB; Goodrum, PM                              | Analysis of the impact of craft labour availability on North American construction project productivity and schedule performance  | Construction management and economics                 | 2017 | 10.1080/01446193.2017.1294257      |    | X  | X  |

| Authors                                                                  | Article Title                                                                                                                                         | Source Title                                          | Year | DOI                                | C1 | C2 | C3 |
|--------------------------------------------------------------------------|-------------------------------------------------------------------------------------------------------------------------------------------------------|-------------------------------------------------------|------|------------------------------------|----|----|----|
| Karimidorabati S., Haas C.T., Gray J.                                    | Evaluation of automation levels for construction change management                                                                                    | Engineering construction and architectural management | 2016 | 10.1108/ECAM-01-2015-0013          |    | X  | X  |
| Karna, S; Junnonen, JM                                                   | Designers' performance evaluation in construction projects                                                                                            | Engineering construction and architectural management | 2017 | 10.1108/ECAM-06-2015-0101          |    |    | X  |
| Karthik D., Kameswara Rao C.B.                                           | Identifying the significant factors affecting the masonry labour productivity in building construction projects                                       | International journal of construction management      | 2019 | 10.1080/15623599.2019.1631978      |    |    | X  |
| Kasana D., Smithwick J.B., M.asce, Mayo G., M.asce, Cavalline T., M.asce | Enhanced Product Evaluation Tools for State Transportation Agencies to Overcome Commonly Faced                                                        | Journal of management in engineering                  | 2020 | 10.1061/(ASCE)ME.1943-5479.0000756 |    |    | X  |
| Kashani H., Ashuri B., Shahandashti S.M., Lu J.                          | Investment valuation model for renewable energy systems in buildings                                                                                  | Journal of construction engineering and management    | 2015 | 10.1061/(ASCE)CO.1943-7862.0000932 |    |    | X  |
| Kavishe N., Chileshe N., Jefferson I.                                    | Public-private partnerships in Tanzanian affordable housing schemes: Policy and regulatory issues, pitfalls and                                       | Built environment project and asset management        | 2019 | 10.1108/BEPAM-01-2018-0010         |    |    | X  |
| Kavishe, N; Chileshe, N                                                  | Identifying Project Management Practices and Principles for Public-Private Partnerships in Housing Projects: The Case of                              | Sustainability                                        | 2018 | 10.3390/su10124609                 |    |    | X  |
| Kavishe, N; Jefferson, I; Chileshe, N                                    | Evaluating issues and outcomes associated with public-private partnership housing project delivery: Tanzanian practitioners' preliminary observations | International journal of construction management      | 2019 | 10.1080/15623599.2018.1435154      |    |    | X  |

| Authors                               | Article Title                                                                                                                     | Source Title                                          | Year | DOI                                | C1 | C2 | C3 |
|---------------------------------------|-----------------------------------------------------------------------------------------------------------------------------------|-------------------------------------------------------|------|------------------------------------|----|----|----|
| Ke Y., Ling F.Y.Y., Ning Y., Zhang Z. | Managing relationships in large public projects: comparative study of China                                                       | Built environment project and asset management        | 2019 | 10.1108/BEPAM-10-2018-0128         |    |    | X  |
| Ke Y., Ling F.Y.Y., Zou P.X.W.        | Effects of contract strategy on interpersonal relations and project outcomes of public-sector construction contracts in Australia | Journal of management in engineering                  | 2015 | 10.1061/(ASCE)ME.1943-5479.0000273 |    |    | X  |
| Keenan M., Rostami A.                 | The impact of quality management systems on construction performance in the North West of England                                 | International journal of construction management      | 2019 | 10.1080/15623599.2019.1590974      |    |    | X  |
| Kerkhove, LP; Vanhoucke, M            | Extensions of earned value management: Using the earned incentive metric to improve signal quality                                | International journal of project management           | 2017 | 10.1016/j.ijproman.2016.10.014     |    |    | X  |
| Kermanshachi S., Safapour E.          | Identification and quantification of project complexity from perspective of primary stakeholders in us construction projects      | Journal of civil engineering and management           | 2019 | 10.3846/jcem.2019.8633             |    |    | X  |
| Keskin B., Salman B., Ozorhon B.      | Airport project delivery within BIM-centric construction technology                                                               | Engineering construction and architectural management | 2020 | 10.1108/ECAM-11-2019-0625          |    | X  | X  |
| Keung, C; Shen, LY                    | Network strategy for contractors' business competitiveness                                                                        | Construction management and economics                 | 2017 | 10.1080/01446193.2017.1329539      | X  |    | X  |
| Khalafallah, A; Kartam, N; Razeq, RA  | Bilevel Standards-Compliant Platform for Evaluating Building Contractor Safety                                                    | Journal of construction engineering and management    | 2019 | 10.1061/(ASCE)CO.1943-7862.0001686 |    |    | X  |

| Authors                                                  | Article Title                                                                                                               | Source Title                                          | Year | DOI                                | C1 | C2 | C3 |
|----------------------------------------------------------|-----------------------------------------------------------------------------------------------------------------------------|-------------------------------------------------------|------|------------------------------------|----|----|----|
| Khallaf R., Naderpajouh N., Hastak M.                    | A systematic approach to develop risk registry frameworks for complex projects                                              | Built environment project and asset management        | 2018 | 10.1108/BEPAM-08-2017-0051         |    |    | X  |
| Khallaf, R; Naderpajouh, N; Hastak, M                    | Modeling Three-Party Interactional Risks in the Governance of Public-Private Partnerships                                   | Journal of management in engineering                  | 2018 | 10.1061/(ASCE)ME.1943-5479.0000646 |    |    | X  |
| Khan, KIA; Flanagan, R; Lu, SL                           | Managing information complexity using system dynamics on construction projects                                              | Construction management and economics                 | 2016 | 10.1080/01446193.2016.1190026      |    | X  | X  |
| Khanh H.D., Kim S.Y.                                     | Development of waste occurrence level indicator in Vietnam construction                                                     | Engineering construction and architectural management | 2015 | 10.1108/ECAM-01-2014-0005          |    |    | X  |
| Khanzadi M., Eshtehardian E., Chalekaee A.               | A game theory approach for optimum strategy of the owner and contractor in delayed projects                                 | Journal of civil engineering and management           | 2016 | 10.3846/13923730.2016.1210222      |    |    | X  |
| Khanzadi M., Eshtehardian E., Mokhlespour Esfahani M.    | Cash flow forecasting with risk consideration using Bayesian Belief Networks                                                | Journal of civil engineering and management           | 2017 | 10.3846/13923730.2017.1374303      |    |    | X  |
| Khanzadi M., Nasirzadeh F., Dashti M.S.                  | Fuzzy Cognitive Map Approach to Analyze Causes of Change Orders in                                                          | Journal of construction engineering and management    | 2018 | 10.1061/(ASCE)CO.1943-7862.0001430 |    |    | X  |
| Khanzadi, M; Turskis, Z; Ghodrati Amiri, G; Chalekaee, A | A MODEL OF DISCRETE ZERO-SUM TWO-PERSON MATRIX GAMES WITH GREY NUMBERS TO SOLVE DISPUTE RESOLUTION PROBLEMS IN CONSTRUCTION | Journal of civil engineering and management           | 2017 | 10.3846/13923730.2017.1323005      |    |    | X  |

| Authors                                                | Article Title                                                                                                                    | Source Title                                          | Year | DOI                                | C1 | C2 | C3 |
|--------------------------------------------------------|----------------------------------------------------------------------------------------------------------------------------------|-------------------------------------------------------|------|------------------------------------|----|----|----|
| Khattak, MS; Mustafa, U                                | Management competencies, complexities and performance in engineering infrastructure projects of                                  | Engineering construction and architectural management | 2019 | 10.1108/ECAM-05-2017-0079          |    |    | X  |
| Khlaifat, DM; Alyagoub, RE; Sweis, RJ; Sweis, GJ       | Factors leading to construction projects' failure                                                                                | International journal of construction management      | 2019 | 10.1080/15623599.2017.1382092      |    |    | X  |
| Khosrowshahi F.                                        | Enhanced project brief: Structured approach to client-designer interface                                                         | Engineering construction and architectural management | 2015 | 10.1108/ECAM-10-2014-0128          | X  | X  |    |
| Khoury K.B.                                            | Effective communication processes for building design, construction, and                                                         | Buildings                                             | 2019 | 10.3390/buildings9050112           | X  |    |    |
| Kifokeris D., Xenidis Y.                               | Constructability: Outline of Past, Present, and Future                                                                           | Journal of construction engineering and management    | 2017 | 10.1061/(ASCE)CO.1943-7862.0001331 |    |    | X  |
| Kifokeris, D; Xenidis, Y                               | Risk source-based constructability appraisal using supervised machine                                                            | Automation in construction                            | 2019 | 10.1016/j.autcon.2019.04.012       |    |    | X  |
| Kim B.-C.                                              | Probabilistic Evaluation of Cost Performance Stability in Earned Value Management                                                | Journal of management in engineering                  | 2016 | 10.1061/(ASCE)ME.1943-5479.0000383 |    |    | X  |
| Kim C.-W., Yoo W.S., Lim H., Yu I., Cho H., Kang K.-I. | Early-warning performance monitoring system (EPMS) using the business information of a project                                   | International journal of project management           | 2018 | 10.1016/j.ijproman.2018.03.010     |    |    | X  |
| Kim D.Y., Menches C.L., O'Connor J.T.                  | Stringing construction planning and execution tasks together for effective project                                               | Journal of management in engineering                  | 2015 | 10.1061/(ASCE)ME.1943-5479.0000267 |    |    | X  |
| Kim J., Koo C., Kim C.-J., Hong T., Park H.S.          | Integrated CO2, cost, and schedule management system for building construction projects using the earned value management theory | Journal of cleaner production                         | 2015 | 10.1016/j.jclepro.2014.05.031      |    |    | X  |

| Authors                                    | Article Title                                                                                                                                              | Source Title                                          | Year | DOI                                | C1 | C2 | C3 |
|--------------------------------------------|------------------------------------------------------------------------------------------------------------------------------------------------------------|-------------------------------------------------------|------|------------------------------------|----|----|----|
| Kim K., Cho Y., Zhang S.                   | Integrating work sequences and temporary structures into safety planning: Automated scaffolding-related safety hazard identification and prevention in BIM | Automation in construction                            | 2016 | 10.1016/j.autcon.2016.06.012       | X  |    |    |
| Kim K., Kim H., Kim H.                     | Image-based construction hazard avoidance system using augmented reality in wearable device                                                                | Automation in construction                            | 2017 | 10.1016/j.autcon.2017.06.014       |    |    | X  |
| Kim K.P., Park K.S.                        | Primary BIM dataset for refurbishing flood risk vulnerable housing in the UK                                                                               | Built environment project and asset management        | 2016 | 10.1108/BEPAM-06-2015-0026         |    |    | X  |
| Kim S., Chang S., Castro-Lacouture D.      | Dynamic Modeling for Analyzing Impacts of Skilled Labor Shortage on Construction Project                                                                   | Journal of management in engineering                  | 2020 | 10.1061/(ASCE)ME.1943-5479.0000720 |    |    | X  |
| Kim S.-C., Kim Y.-W., Park K.S., Yoo C.-Y. | Impact of measuring operational-level planning reliability on management-level project performance                                                         | Journal of management in engineering                  | 2015 | 10.1061/(ASCE)ME.1943-5479.0000326 |    |    | X  |
| Kim S.Y., Nguyen M.V., Luu V.T.            | A performance evaluation framework for construction and demolition waste management: stakeholder                                                           | Engineering construction and architectural management | 2020 | 10.1108/ECAM-12-2019-0683          |    |    | X  |
| Kim Y.-W., Rhee B.-D.                      | The Impact of Empowering Front-Line Managers on Planning Reliability and Project Schedule                                                                  | Journal of management in engineering                  | 2020 | 10.1061/(ASCE)ME.1943-5479.0000751 |    |    | X  |
| Kim, CW; Kim, T; Lee, UK; Cho, H; Kang, KI | Advanced Steel Beam Assembly Approach for Improving Safety of Structural Steel Workers                                                                     | Journal of construction engineering and management    | 2016 | 10.1061/(ASCE)CO.1943-7862.0001090 |    | X  |    |



| Authors                                            | Article Title                                                                                                                                     | Source Title                                       | Year | DOI                                | C1 | C2 | C3 |
|----------------------------------------------------|---------------------------------------------------------------------------------------------------------------------------------------------------|----------------------------------------------------|------|------------------------------------|----|----|----|
| Kim, H; Ahn, CR; Yang, K                           | Identifying Safety Hazards Using Collective Bodily Responses of Workers                                                                           | Journal of construction engineering and management | 2017 | 10.1061/(ASCE)CO.1943-7862.0001220 |    |    | X  |
| Kim, H; Bae, J; Baek, S; Nam, D; Cho, H; Chang, HJ | Comparative Analysis between the Government Micro-Grid Plan and Computer Simulation Results Based on Real Data: The Practical Case for a South    | Sustainability                                     | 2017 | 10.3390/su9020197                  |    | X  | X  |
| Kim, H; Han, S                                     | Accuracy Improvement of Real-Time Location Tracking for Construction Workers                                                                      | Sustainability                                     | 2018 | 10.3390/su10051488                 |    |    | X  |
| Kim, JI; Kim, J; Fischer, M; Orr, R                | BIM-based decision-support method for master planning of sustainable large-scale developments                                                     | Automation in construction                         | 2015 | 10.1016/j.autcon.2015.07.003       |    |    | X  |
| Kim, JM; Son, K; Yoo, Y; Lee, D; Kim, DY           | Identifying Risk Indicators of Building Damage Due to Typhoons: Focusing on Cases of South Korea                                                  | Sustainability                                     | 2018 | 10.3390/su10113947                 |    |    | X  |
| Kim, M; Lee, I; Jung, Y                            | International Project Risk Management for Nuclear Power Plant (NPP) Construction: Featuring Comparative Analysis with Fossil and Gas Power Plants | Sustainability                                     | 2017 | 10.3390/su9030469                  |    |    | X  |
| Kim, MG; Woo, C; Rho, JJ; Chung, Y                 | Environmental Capabilities of Suppliers for Green Supply Chain Management in Construction Projects: A Case Study in Korea                         | Sustainability                                     | 2016 | 10.3390/su8010082                  |    |    | X  |

| Authors                                           | Article Title                                                                                                                                             | Source Title                      | Year | DOI                           | C1 | C2 | C3 |
|---------------------------------------------------|-----------------------------------------------------------------------------------------------------------------------------------------------------------|-----------------------------------|------|-------------------------------|----|----|----|
| Kim, MH; Lee, EB; Choi, HS                        | Detail Engineering Completion Rating Index System (DECRIS) for Optimal Initiation of Construction Works to Improve Contractors' Schedule-Cost Performance | Sustainability                    | 2018 | 10.3390/su10072469            |    | X  |    |
| Kim, MS; Lee, EB; Jung, IH; Alleman, D            | Risk Assessment and Mitigation Model for Overseas Steel-Plant Project Investment with Analytic Hierarchy Process                                          | Sustainability                    | 2018 | 10.3390/su10124780            |    |    | X  |
| Kim, SY; Tuan, KN; Luu, VT                        | Delay Factor Analysis for Hospital Projects in Vietnam                                                                                                    | KSCE journal of civil engineering | 2016 | 10.1007/s12205-015-0316-1     |    | X  |    |
| Kim, T; Kim, YW; Cho, H                           | Dynamic production scheduling model under due date uncertainty in precast concrete construction                                                           | Journal of cleaner production     | 2020 | 10.1016/j.jclepro.2020.120527 |    |    | X  |
| Kim, T; Lim, H; Kim, CW; Lee, D; Cho, H; Kang, KI | The Accelerated Window Work Method Using Vertical Formwork for Tall Residential Building                                                                  | Sustainability                    | 2018 | 10.3390/su10020456            |    |    | X  |
| Kim, TH                                           | Assessment of Construction Cost Saving by Concrete Mixing the Activator                                                                                   | Sustainability                    | 2016 | 10.3390/su8040403             |    | X  |    |
| Kim, TW; Kim, Y; Cha, SH; Fischer, M              | Automated updating of space design requirements connecting user activities and                                                                            | Automation in construction        | 2015 | 10.1016/j.autcon.2014.12.010  |    | X  | X  |
| Kim, Y; Lee, EB                                   | A Probabilistic Alternative Approach to Optimal Project Profitability Based on the Value-at-Risk                                                          | Sustainability                    | 2018 | 10.3390/su10030747            |    |    | X  |

| Authors                                                                  | Article Title                                                                                                                        | Source Title                                       | Year | DOI                                | C1 | C2 | C3 |
|--------------------------------------------------------------------------|--------------------------------------------------------------------------------------------------------------------------------------|----------------------------------------------------|------|------------------------------------|----|----|----|
| Kiomjian D., Srour I., A.m.asce, Srour F.J., 0000-0001-7623-723x         | Knowledge Sharing and Productivity Improvement: An Agent-Based Modeling Approach                                                     | Journal of construction engineering and management | 2020 | 10.1061/(ASCE)CO.1943-7862.0001866 |    |    | X  |
| Kisi K.P., Mani N., Rojas E.M., Foster E.T.                              | Optimal productivity in labor-intensive construction operations: Pilot study                                                         | Journal of construction engineering and management | 2017 | 10.1061/(ASCE)CO.1943-7862.0001257 |    | X  | X  |
| Kisi K.P., Mani N., Rojas E.M., Foster E.T.                              | Estimation of Optimal Productivity in Labor-Intensive Construction Operations: Advanced Study                                        | Journal of construction engineering and management | 2018 | 10.1061/(ASCE)CO.1943-7862.0001551 |    |    | X  |
| Kissi E., Agyekum K., Baiden B.K., Tannor R.A., Asamoah G.E., Andam E.T. | Impact of project monitoring and evaluation practices on construction project success criteria in Ghana                              | Built environment project and asset management     | 2019 | 10.1108/BEPAM-11-2018-0135         |    |    | X  |
| Kissi, E; Boateng, EB; Adjei-Kumi, T; Badu, E                            | Principal component analysis of challenges facing the implementation of value engineering in public projects in developing countries | International journal of construction management   | 2017 | 10.1080/15623599.2016.1233088      |    |    | X  |
| Klanšek U.                                                               | Mixed-Integer Nonlinear Programming Model for Nonlinear Discrete Optimization of Project Schedules under Restricted                  | Journal of construction engineering and management | 2016 | 10.1061/(ASCE)CO.1943-7862.0001074 |    |    | X  |
| Ko, HS; Azambuja, M; Lee, HF                                             | Cloud-based Materials Tracking System Prototype Integrated with Radio Frequency Identification Tagging Technology                    | Automation in construction                         | 2016 | 10.1016/j.autcon.2015.12.011       |    | X  | X  |
| Koch C., Schultz C.S.                                                    | The production of defects in construction—an agency dissonance                                                                       | Construction management and economics              | 2019 | 10.1080/01446193.2018.1519253      |    | X  | X  |

| Authors                                   | Article Title                                                                                                           | Source Title                                          | Year | DOI                           | C1 | C2 | C3 |
|-------------------------------------------|-------------------------------------------------------------------------------------------------------------------------|-------------------------------------------------------|------|-------------------------------|----|----|----|
| Koch C., Vonthron A., König M.            | A tunnel information modelling framework to support management, simulations and visualisations in mechanised tunnelling | Automation in construction                            | 2017 | 10.1016/j.autcon.2017.07.006  |    |    | X  |
| Kog F., Yaman H.                          | A multi-agent systems-based contractor pre-qualification model                                                          | Engineering construction and architectural management | 2016 | 10.1108/ECAM-01-2016-0013     |    | X  | X  |
| Kokkonen A., Alin P.                      | Practitioners deconstructing and reconstructing practices when responding to the implementation of BIM                  | Construction management and economics                 | 2016 | 10.1080/01446193.2016.1164327 |    |    | X  |
| Kokkonen A., Vaagaasar A.L.               | Managing collaborative space in multi-partner projects                                                                  | Construction management and economics                 | 2018 | 10.1080/01446193.2017.1347268 |    |    | X  |
| Kokkonen, A; Alin, P                      | Practice-based learning in construction projects: a literature review                                                   | Construction management and economics                 | 2015 | 10.1080/01446193.2015.1062903 |    |    | X  |
| Konanahalli, A; Oyedele, LO               | Emotional intelligence and British expatriates' cross-cultural adjustment in international construction projects        | Construction management and economics                 | 2016 | 10.1080/01446193.2016.1213399 |    |    | X  |
| Kong L., Li H., Luo H., Ding L., Zhang X. | Sustainable performance of just-in-time (JIT) management in time-dependent batch delivery scheduling of precast         | Journal of cleaner production                         | 2018 | 10.1016/j.jclepro.2018.05.037 |    |    | X  |
| Konior, J; Szostak, M                     | Methodology of Planning the Course of the Cumulative Cost Curve in Construction                                         | Sustainability                                        | 2020 | 10.3390/su12062347            |    |    | X  |
| Konno Y.                                  | Analysing Japanese contractor activity on the basis of panel data                                                       | Engineering construction and architectural management | 2015 | 10.1108/ECAM-03-2014-0035     |    |    | X  |

| Authors                                                                   | Article Title                                                                                                                                     | Source Title                                             | Year | DOI                                | C1 | C2 | C3 |
|---------------------------------------------------------------------------|---------------------------------------------------------------------------------------------------------------------------------------------------|----------------------------------------------------------|------|------------------------------------|----|----|----|
| Konnola, K; Kangas, K;<br>Seppala, K; Makela, M;<br>Lehtonen, T           | Considering sustainability in<br>cruise vessel design and<br>construction based on<br>existing sustainability<br>certification systems            | Journal of cleaner production                            | 2020 | 10.1016/j.jclepro.2020.120763      |    |    | X  |
| Koo C., Hong T., Kim S.                                                   | An integrated multi-objective<br>optimization model for<br>solving the construction time-<br>cost trade-off problem                               | Journal of civil engineering<br>and management           | 2015 | 10.3846/13923730.2013.802733       |    |    | X  |
| Koolwijk J.S.J., Van Oel<br>C.J., Gaviria Moreno J.C.                     | No-Blame Culture and the<br>Effectiveness of Project-<br>Based Design Teams in the<br>Construction Industry: The<br>Mediating Role of Teamwork    | Journal of management in<br>engineering                  | 2020 | 10.1061/(ASCE)ME.1943-5479.0000796 |    |    | X  |
| Koolwijk J.S.J., Van Oel<br>C.J., Wamelink J.W.F.,<br>Vrijhoef R.         | Collaboration and Integration<br>in Project-Based Supply<br>Chains in the Construction                                                            | Journal of management in<br>engineering                  | 2018 | 10.1061/(ASCE)ME.1943-5479.0000592 |    |    | X  |
| Koops L., Bosch-Rekveldt<br>M., Bakker H., Hertogh M.                     | Exploring the influence of<br>external actors on the<br>cooperation in public-private<br>project organizations for<br>constructing infrastructure | International journal of<br>project management           | 2017 | 10.1016/j.ijproman.2017.02.012     |    |    | X  |
| Koops L., Van Loenhout C.,<br>Bosch-Rekveldt M., Hertogh<br>M., Bakker H. | Different perspectives of<br>public project managers on<br>project success                                                                        | Engineering construction and<br>architectural management | 2017 | 10.1108/ECAM-01-2015-0007          |    |    | X  |
| Koseoglu O., Nurtan-Gunes<br>E.T.                                         | Mobile BIM implementation<br>and lean interaction on<br>construction site: A case<br>study of a complex airport                                   | Engineering construction and<br>architectural management | 2018 | 10.1108/ECAM-08-2017-0188          | X  |    | X  |
| Koseoglu O., Sakin M.,<br>Arayici Y.                                      | Exploring the BIM and lean<br>synergies in the Istanbul<br>Grand Airport construction                                                             | Engineering construction and<br>architectural management | 2018 | 10.1108/ECAM-08-2017-0186          |    |    | X  |

| Authors                                                                       | Article Title                                                                                                       | Source Title                                       | Year | DOI                                | C1 | C2 | C3 |
|-------------------------------------------------------------------------------|---------------------------------------------------------------------------------------------------------------------|----------------------------------------------------|------|------------------------------------|----|----|----|
| Koskela L.                                                                    | Why is management research irrelevant?                                                                              | Construction management and economics              | 2017 | 10.1080/01446193.2016.1272759      |    |    | X  |
| Koskela L., Ferrantelli A., Niiranen J., Pikas E., Dave B.                    | Epistemological Explanation of Lean Construction                                                                    | Journal of construction engineering and management | 2019 | 10.1061/(ASCE)CO.1943-7862.0001597 |    |    | X  |
| Kosonen H.K., Kim A.A.                                                        | Mental Model Approach to Wastewater Treatment Plant Project Delivery during Emergency Response                      | Journal of construction engineering and management | 2018 | 10.1061/(ASCE)CO.1943-7862.0001488 |    |    | X  |
| Kouhestani S., Nik-Bakht M.                                                   | IFC-based process mining for design authoring                                                                       | Automation in construction                         | 2020 | 10.1016/j.autcon.2019.103069       |    |    | X  |
| Koulinas, GK; Demesouka, OE; Marhavidas, PK; Vavatsikos, AP; Koulouriotis, DE | Risk Assessment Using Fuzzy TOPSIS and PRAT for Sustainable Engineering Projects                                    | Sustainability                                     | 2019 | 10.3390/su11030615                 |    |    | X  |
| Kovacic, I; Waltenbereger, L; Gourlis, G                                      | Tool for life cycle analysis of facade-systems for industrial buildings                                             | Journal of cleaner production                      | 2016 | 10.1016/j.jclepro.2015.10.063      |    | X  |    |
| Kowalczyk, C; Kil, J; Kurowska, K                                             | Changes in Land Plot Morphology Resulting from the Construction of a Bypass: The Example of a Polish City           | Sustainability                                     | 2019 | 10.3390/su11102987                 |    |    | X  |
| Kraft E., Molenaar K.R.                                                       | Quality assurance organization selection factors for highway design and                                             | Journal of management in engineering               | 2015 | 10.1061/(ASCE)ME.1943-5479.0000289 |    |    | X  |
| Krajangsri, T; Pongpeng, J                                                    | Effect of Sustainable Infrastructure Assessments on Construction Project Success Using Structural Equation Modeling | Journal of management in engineering               | 2017 | 10.1061/(ASCE)ME.1943-5479.0000509 |    |    | X  |
| Krantz J., Feng K., Larsson J., Olofsson T.                                   | 'Eco-Hauling' principles to reduce carbon emissions and the costs of earthmoving - A case study                     | Journal of cleaner production                      | 2019 | 10.1016/j.jclepro.2018.10.113      |    |    | X  |

| Authors                                                                   | Article Title                                                                                                                             | Source Title                                          | Year | DOI                                | C1 | C2 | C3 |
|---------------------------------------------------------------------------|-------------------------------------------------------------------------------------------------------------------------------------------|-------------------------------------------------------|------|------------------------------------|----|----|----|
| Krechowicz M.                                                             | Comprehensive Risk Management in Horizontal Directional Drilling Projects                                                                 | Journal of construction engineering and management    | 2020 | 10.1061/(ASCE)CO.1943-7862.0001809 |    |    | X  |
| Krishnankutty, P; Hwang, BG; Caldas, CH; Muralidharan, S; de Oliveira, DP | Assessing the Implementation of Best Productivity Practices in Maintenance Activities, Shutdowns, and Turnarounds of Petrochemical Plants | Sustainability                                        | 2019 | 10.3390/su11051239                 |    |    | X  |
| Kropp C., Koch C., König M.                                               | Interior construction state recognition with 4D BIM registered image sequences                                                            | Automation in construction                            | 2018 | 10.1016/j.autcon.2017.10.027       |    | X  |    |
| Krystallis I., Demian P., Price A.D.F.                                    | Using BIM to integrate and achieve holistic future-proofing objectives in                                                                 | Construction management and economics                 | 2015 | 10.1080/01446193.2016.1164326      |    |    | X  |
| Kubicki S., Guerriero A., Schwartz L., Daher E., Idris B.                 | Assessment of synchronous interactive devices for BIM project coordination: Prospective ergonomics approach                               | Automation in construction                            | 2019 | 10.1016/j.autcon.2018.12.009       |    |    | X  |
| Kuenzel R., Teizer J., Mueller M., Blickle A.                             | SmartSite: Intelligent and autonomous environments, machinery, and processes to realize smart road construction projects                  | Automation in construction                            | 2016 | 10.1016/j.autcon.2016.03.012       | X  | X  | X  |
| Kumar V., Lin E.T.A.                                                      | Conceptualizing “COBieEvaluator”: A rule based system for tracking asset changes using COBie datasheets                                   | Engineering construction and architectural management | 2020 | 10.1108/ECAM-04-2019-0216          |    |    | X  |
| Kunz J., Fischer M.                                                       | Virtual design and construction                                                                                                           | Construction management and economics                 | 2020 | 10.1080/01446193.2020.1714068      |    |    | X  |

| Authors                                      | Article Title                                                                                                      | Source Title                                          | Year | DOI                                | C1 | C2 | C3 |
|----------------------------------------------|--------------------------------------------------------------------------------------------------------------------|-------------------------------------------------------|------|------------------------------------|----|----|----|
| Kvist Nielsen L.-H., Akanmu A., Anumba C.J.  | Comparative analysis of back-to-back subcontracts in the construction and telecommunications                       | Built environment project and asset management        | 2015 | 10.1108/BEPAM-10-2013-0044         |    |    | X  |
| Kwofie T.E., Adinyira E., Botchway E.A.      | Identification of the critical project management competencies of architects in the Ghanaian construction industry | International journal of construction management      | 2015 | 10.1080/15623599.2015.1067347      |    |    | X  |
| Kwofie T.E., Aigbavboa C.O., Machethe S.O.   | Nature of communication performance in non-traditional procurements in                                             | Engineering construction and architectural management | 2019 | 10.1108/ECAM-02-2018-0044          | X  |    | X  |
| Kwofie T.E., Amos-Abanyie S., Afram S.O.     | Principal component analysis of professional competencies of architects in the Ghanaian construction industry      | Engineering construction and architectural management | 2016 | 10.1108/ECAM-08-2014-0108          |    |    | X  |
| Kwofie T.E., Ohis Aigbavboa C., Thwala W.D.  | Communication performance challenges in PPP projects: cases of Ghana and South Africa                              | Built environment project and asset management        | 2019 | 10.1108/BEPAM-11-2018-0137         | X  |    | X  |
| Kwon N., Cho J., Lee H.-S., Yoon I., Park M. | Compensation Cost Estimation Model for Construction Noise Claims Using Case-Based Reasoning                        | Journal of construction engineering and management    | 2019 | 10.1061/(ASCE)CO.1943-7862.0001675 |    |    | X  |
| Kwon N., Park M., Lee H.-S., Ahn J., Kim S.  | Construction Noise Prediction Model Based on Case-Based Reasoning in the Preconstruction Phase                     | Journal of construction engineering and management    | 2017 | 10.1061/(ASCE)CO.1943-7862.0001291 |    |    | X  |
| Kwon N., Park M., Lee H.-S., Ahn J., Shin M. | Construction Noise Management Using Active Noise Control Techniques                                                | Journal of construction engineering and management    | 2016 | 10.1061/(ASCE)CO.1943-7862.0001121 |    |    | X  |



| Authors                                      | Article Title                                                                                                                                             | Source Title                                             | Year | DOI                                | C1 | C2 | C3 |
|----------------------------------------------|-----------------------------------------------------------------------------------------------------------------------------------------------------------|----------------------------------------------------------|------|------------------------------------|----|----|----|
| Kwon, N; Lee, J; Park, M;<br>Yoon, I; Ahn, Y | Performance Evaluation of<br>Distance Measurement<br>Methods for Construction<br>Noise Prediction Using Case-<br>Based Reasoning                          | Sustainability                                           | 2019 | 10.3390/su11030871                 |    |    | X  |
| Kyro, R; Peltokorpi, A;<br>Luoma-Halkola, L  | Connecting adaptability<br>strategies to building system<br>lifecycles in hospital retrofits                                                              | Engineering construction and<br>architectural management | 2019 | 10.1108/ECAM-10-2017-0217          |    |    | X  |
| Lagos C.I., Herrera R.F.,<br>Alarcón L.F.    | Assessing the Impacts of an<br>IT LPS Support System on<br>Schedule Accomplishment in<br>Construction Projects                                            | Journal of construction<br>engineering and management    | 2019 | 10.1061/(ASCE)CO.1943-7862.0001691 |    |    | X  |
| Lai, HH; Zhou, C; Deng, XY                   | EXCHANGE<br>REQUIREMENT-BASED<br>DELIVERY METHOD OF<br>STRUCTURAL DESIGN<br>INFORMATION FOR<br>COLLABORATIVE<br>DESIGN USING<br>INDUSTRY FOUNDATION       | Journal of civil engineering<br>and management           | 2019 | 10.3846/jcem.2019.9870             |    |    | X  |
| Lai, LWC; Lorne, FT                          | Sustainable Urban Renewal<br>and Built Heritage<br>Conservation in a Global                                                                               | Sustainability                                           | 2019 | 10.3390/su11030850                 |    |    | X  |
| Lai, XD; Liu, JX; Georgiev,<br>G             | Low carbon technology<br>integration innovation<br>assessment index review<br>based on rough set theory -<br>an evidence from<br>construction industry in | Journal of cleaner production                            | 2016 | 10.1016/j.jclepro.2016.03.035      |    | X  | X  |
| Laiola, E; Giungato, P                       | Wind characterization in<br>Taranto city as a basis for<br>innovative sustainable urban<br>development                                                    | Journal of cleaner production                            | 2018 | 10.1016/j.jclepro.2017.05.111      |    |    | X  |

| Authors                                                | Article Title                                                                                            | Source Title                                       | Year | DOI                                | C1 | C2 | C3 |
|--------------------------------------------------------|----------------------------------------------------------------------------------------------------------|----------------------------------------------------|------|------------------------------------|----|----|----|
| Lam P.T.I., Yu A.T.W., Wu Z., Poon C.S.                | Methodology for upstream estimation of construction waste for new building                               | Journal of cleaner production                      | 2019 | 10.1016/j.jclepro.2019.04.183      |    |    | X  |
| Lam T.T., Mahdjoubi L., Mason J.                       | A framework to assist in the analysis of risks and rewards of adopting BIM for SMEs in the UK            | Journal of civil engineering and management        | 2017 | 10.3846/13923730.2017.1281840      |    |    | X  |
| Lam, PTI; Fu, FCS                                      | Exploratory Study on Current Status of Startups in the Hong Kong Built                                   | Journal of management in engineering               | 2019 | 10.1061/(ASCE)ME.1943-5479.0000696 | X  | X  | X  |
| Lambrechts, W; Gelderman, CJ; Semeijn, J; Verhoeven, E | The role of individual sustainability competences in eco-design building projects                        | Journal of cleaner production                      | 2019 | 10.1016/j.jclepro.2018.10.084      |    |    | X  |
| Larsen J.K., Shen G.Q., Lindhard SØ.M., Brunoe T.D.    | Factors Affecting Schedule Delay, Cost Overrun, and Quality Level in Public Construction Projects        | Journal of management in engineering               | 2016 | 10.1061/(ASCE)ME.1943-5479.0000391 |    |    | X  |
| Larsson J., Eriksson P.E., Olofsson T., Simonsson P.   | Leadership in civil engineering: Effects of project managers' leadership styles on project performance   | Journal of management in engineering               | 2015 | 10.1061/(ASCE)ME.1943-5479.0000367 |    |    | X  |
| Larsson J., Lu W., Krantz J., Olofsson T.              | Discrete Event Simulation Analysis of Product and Process Platforms: A Bridge Construction Case Study    | Journal of construction engineering and management | 2016 | 10.1061/(ASCE)CO.1943-7862.0001093 |    | X  | X  |
| Larsson, J; Larsson, L                                 | Integration, Application and Importance of Collaboration in Sustainable Project Management               | Sustainability                                     | 2020 | 10.3390/su12020585                 |    |    | X  |
| Larsson, L; Larsson, J                                 | Sustainable Development in Project-Based Industries-Supporting the Realization of Explorative Innovation | Sustainability                                     | 2018 | 10.3390/su10030683                 |    |    | X  |

| Authors                                             | Article Title                                                                                                               | Source Title                                          | Year | DOI                                | C1 | C2 | C3 |
|-----------------------------------------------------|-----------------------------------------------------------------------------------------------------------------------------|-------------------------------------------------------|------|------------------------------------|----|----|----|
| Laryea S.                                           | Procurement strategy and outcomes of a new universities project in South                                                    | Engineering construction and architectural management | 2019 | 10.1108/ECAM-04-2018-0154          |    |    | X  |
| Lau C.H., Mesthrige J.W., Lam P.T.I., Javed A.A.    | The challenges of adopting new engineering contract: a Hong Kong study                                                      | Engineering construction and architectural management | 2019 | 10.1108/ECAM-02-2018-0055          |    |    | X  |
| Laurent J., Leicht R.M.                             | Practices for Designing Cross-Functional Teams for Integrated Project Delivery                                              | Journal of construction engineering and management    | 2019 | 10.1061/(ASCE)CO.1943-7862.0001605 |    |    | X  |
| Law E.P., Diemont S.A.W., Toland T.R.               | A sustainability comparison of green infrastructure interventions using emergy evaluation                                   | Journal of cleaner production                         | 2017 | 10.1016/j.jclepro.2016.12.039      |    |    | X  |
| Lavikka R.H., Kyrö R., Peltokorpi A., Särkilahti A. | Revealing change dynamics in hospital construction                                                                          | Engineering construction and architectural management | 2019 | 10.1108/ECAM-03-2018-0119          |    |    | X  |
| Le P.L., Elmughrabi W., Dao T.-M., Chaabane A.      | Present focuses and future directions of decision-making in construction supply chain management: a systematic review       | International journal of construction management      | 2020 | 10.1080/15623599.2018.1488089      |    |    | X  |
| Le T., Hassan F., Le C., Jeong H.D.                 | Understanding dynamic data interaction between civil integrated management technologies: a review of use cases and enabling | International journal of construction management      | 2019 | 10.1080/15623599.2019.1678863      | X  |    | X  |
| Le T., Le C., David Jeong H.                        | Lifecycle Data Modeling to Support Transferring Project-Oriented Data to Asset-Oriented Systems in Transportation Projects  | Journal of management in engineering                  | 2018 | 10.1061/(ASCE)ME.1943-5479.0000620 | X  |    | X  |

| Authors                                                 | Article Title                                                                                                       | Source Title                                          | Year | DOI                                | C1 | C2 | C3 |
|---------------------------------------------------------|---------------------------------------------------------------------------------------------------------------------|-------------------------------------------------------|------|------------------------------------|----|----|----|
| Le, PL; Chaabane, A; Dao, TM                            | BIM contributions to construction supply chain management trends: an exploratory study in Canada                    | International journal of construction management      |      | 10.1080/15623599.2019.1639124      |    |    | X  |
| Le, PT; Chileshe, N; Kirytopoulos, K; Rameezdeen, R     | Investigating the significance of risks in BOT transportation projects in                                           | Engineering construction and architectural management |      | 10.1108/ECAM-08-2019-0439          |    |    | X  |
| Le, Y; Wan, JY; Wang, G; Bai, J; Zhang, B               | Exploring the missing link between top management team characteristics and megaproject performance                  | Engineering construction and architectural management | 2020 | 10.1108/ECAM-12-2018-0566          |    |    | X  |
| Lee B., Lee H.-S., Park M., Kim H.                      | Influence Factors of Learning-Curve Effect in High-Rise Building Constructions                                      | Journal of construction engineering and management    | 2015 | 10.1061/(ASCE)CO.1943-7862.0000997 |    |    | X  |
| Lee C.                                                  | Financing method for real estate and infrastructure development using Markowitz's portfolio selection model and the | Engineering construction and architectural management | 2019 | 10.1108/ECAM-10-2018-0440          |    |    | X  |
| Lee C., Won J.W., Jang W., Jung W., Han S.H., Kwak Y.H. | Social conflict management framework for project viability: Case studies from Korean megaprojects                   | International journal of project management           | 2017 | 10.1016/j.ijproman.2017.07.011     |    |    | X  |
| Lee C.K., Yiu T.W., Cheung S.O.                         | Selection and use of Alternative Dispute Resolution (ADR) in construction projects - Past                           | International journal of project management           | 2016 | 10.1016/j.ijproman.2015.12.008     |    |    | X  |
| Lee D., Kim D.-S., Kim G.-H., Kim S.                    | Time reduction effect of the enhanced TACT method for high-rise residential buildings                               | Journal of civil engineering and management           | 2016 | 10.3846/13923730.2014.945949       |    |    | X  |
| Lee H.W., Tommelein I.D., Ballard G.                    | Target-setting practice for loans for commercial energy-retrofit projects                                           | Journal of management in engineering                  | 2015 | 10.1061/(ASCE)ME.1943-5479.0000245 |    |    | X  |

| Authors                                          | Article Title                                                                                           | Source Title                                       | Year | DOI                                | C1 | C2 | C3 |
|--------------------------------------------------|---------------------------------------------------------------------------------------------------------|----------------------------------------------------|------|------------------------------------|----|----|----|
| Lee J., Hyun H.                                  | Multiple Modular Building Construction Project Scheduling Using Genetic                                 | Journal of construction engineering and management | 2019 | 10.1061/(ASCE)CO.1943-7862.0001585 |    |    | X  |
| Lee J.I., Lee H.-S., Park M.                     | Contractor Liquidity Evaluation Model for Successful Public Housing                                     | Journal of construction engineering and management | 2018 | 10.1061/(ASCE)CO.1943-7862.0001569 |    |    | X  |
| Lee J.-S.                                        | Estimating Cumulative Damages due to Disruptions in Repetitive Construction                             | Journal of construction engineering and management | 2016 | 10.1061/(ASCE)CO.1943-7862.0001184 |    |    | X  |
| Lee K.-P., Lee H.-S., Park M., Kim D.Y., Jung M. | Management-Reserve Estimation for International Construction Projects Based on Risk-Informed k-NN       | Journal of management in engineering               | 2017 | 10.1061/(ASCE)ME.1943-5479.0000510 |    |    | X  |
| Lee S.                                           | Determination of priority weights under multiattribute decision-making situations: Ahp versus fuzzy ahp | Journal of construction engineering and management | 2015 | 10.1061/(ASCE)CO.1943-7862.0000897 |    |    | X  |
| Lee S., Sawang S.                                | Unpacking the impact of attachment to project teams on boundary-spanning                                | International journal of project management        | 2016 | 10.1016/j.ijproman.2015.12.003     |    |    | X  |
| Lee S., Tae S., Yoo S., Shin S.                  | Impact of Business Portfolio Diversification on Construction Company                                    | Journal of management in engineering               | 2016 | 10.1061/(ASCE)ME.1943-5479.0000413 |    |    | X  |
| Lee S., Yu J.                                    | Comparative Study of BIM Acceptance between Korea and the United States                                 | Journal of construction engineering and management | 2016 | 10.1061/(ASCE)CO.1943-7862.0001076 |    |    | X  |
| Lee S.S., Park S.-I., Seo J.                     | Utilization analysis methodology for fleet telematics of heavy                                          | Automation in construction                         | 2018 | 10.1016/j.autcon.2018.02.035       |    |    | X  |
| Lee Y.-C., Eastman C.M., Solihin W.              | Logic for ensuring the data exchange integrity of building information models                           | Automation in construction                         | 2018 | 10.1016/j.autcon.2017.08.010       |    |    | X  |

| Authors                              | Article Title                                                                                                                                | Source Title                                       | Year | DOI                                | C1 | C2 | C3 |
|--------------------------------------|----------------------------------------------------------------------------------------------------------------------------------------------|----------------------------------------------------|------|------------------------------------|----|----|----|
| Lee Y.-S., Kim J.-J., Lee T.S.       | Topological Competiveness Based on Social Relationships in the Korean Construction-Management                                                | Journal of construction engineering and management | 2016 | 10.1061/(ASCE)CO.1943-7862.0001175 |    |    | X  |
| Lee, C; Lee, C; Lee, EB              | A METHOD FOR ANALYZING THE EFFECT OF IMPLEMENTING AN ENTERPRISE SYSTEM BASED ON THE COMPLEXITY OF ACTIVITIES                                 | Journal of civil engineering and management        | 2018 | 10.3846/jcem.2018.6130             |    |    | X  |
| Lee, D; Kim, S; Kim, S               | Development of Hybrid Model for Estimating Construction Waste for Multifamily Residential Buildings Using Artificial Neural Networks and Ant | Sustainability                                     | 2016 | 10.3390/su8090870                  |    |    | X  |
| Lee, J; Kim, J                       | BIM-Based 4D Simulation to Improve Module Manufacturing Productivity for Sustainable Building                                                | Sustainability                                     | 2017 | 10.3390/su9030426                  |    |    | X  |
| Lee, J; Park, M; Lee, HS; Hyun, H    | Classification of Modular Building Construction Projects Based on Schedule-Driven Approach                                                   | Journal of construction engineering and management | 2019 | 10.1061/(ASCE)CO.1943-7862.0001656 |    |    | X  |
| Lee, KW; Han, SH; Park, H; Jeong, HD | Empirical Analysis of Host-Country Effects in the International Construction Market: An Industry-Level Approach                              | Journal of construction engineering and management | 2016 | 10.1061/(ASCE)CO.1943-7862.0001083 |    |    | X  |

| Authors                                                                 | Article Title                                                                                                          | Source Title                                       | Year | DOI                                | C1 | C2 | C3 |
|-------------------------------------------------------------------------|------------------------------------------------------------------------------------------------------------------------|----------------------------------------------------|------|------------------------------------|----|----|----|
| Lee, KW; Jung, W; Han, SH                                               | Country Selection Model for Sustainable Construction Businesses Using Hybrid of Objective and Subjective Information   | Sustainability                                     | 2017 | 10.3390/su9050800                  |    | X  |    |
| Lee, S; Cha, Y; Han, S; Hyun, C                                         | Application of Association Rule Mining and Social Network Analysis for Understanding Causality of Construction Defects | Sustainability                                     | 2019 | 10.3390/su11030618                 |    |    | X  |
| Lee, S; Kim, K                                                          | Collar Option Model for Managing the Cost Overrun Caused by Change Orders                                              | Sustainability                                     | 2015 | 10.3390/su70810649                 |    |    | X  |
| Lee, S; Lee, J; Ahn, Y                                                  | Sustainable BIM-Based Construction Engineering Education Curriculum for Practice-Oriented Training                     | Sustainability                                     | 2019 | 10.3390/su11216120                 |    |    | X  |
| Lee, S; Yu, J; Jeong, D                                                 | BIM Acceptance Model in Construction Organizations                                                                     | Journal of management in engineering               | 2015 | 10.1061/(ASCE)ME.1943-5479.0000252 |    |    | X  |
| Le-Hoai L., Dang C.N., Lee S.B., Lee Y.D.                               | Benchmarking claim causes against contractors in emerging markets: empirical                                           | International journal of construction management   | 2019 | 10.1080/15623599.2018.1435156      |    |    | X  |
| Lei Z., Han S., Bouferguène A., Taghaddos H., Hermann U., Al-Hussein M. | Algorithm for mobile crane walking path planning in congested industrial plants                                        | Journal of construction engineering and management | 2015 | 10.1061/(ASCE)CO.1943-7862.0000929 |    | X  |    |
| Lei Z., Tang W., Duffield C., Zhang L., Hui F.K.P.                      | The impact of technical standards on international project performance: Chinese contractors' experience                | International journal of project management        | 2017 | 10.1016/j.ijproman.2017.09.002     |    |    | X  |

| Authors                                                      | Article Title                                                                                                         | Source Title                                          | Year | DOI                                | C1 | C2 | C3 |
|--------------------------------------------------------------|-----------------------------------------------------------------------------------------------------------------------|-------------------------------------------------------|------|------------------------------------|----|----|----|
| Lei, Z; Tang, WZ; Duffield, CF; Zhang, LH; Hui, FKP; You, RC | Qualitative Analysis of the Occupational Health and Safety Performance of Chinese International Construction Projects | Sustainability                                        | 2018 | 10.3390/su10124344                 |    |    | X  |
| Leite R.M.C., Costa D.B., Neto H.M.M., Durão F.A.            | Gamification technique for supporting transparency on construction sites: A case                                      | Engineering construction and architectural management | 2016 | 10.1108/ECAM-12-2015-0196          | X  |    | X  |
| Leon, H; Osman, H; Georgy, M; Elsaid, M                      | System Dynamics Approach for Forecasting Performance of Construction Projects                                         | Journal of management in engineering                  | 2018 | 10.1061/(ASCE)ME.1943-5479.0000575 |    |    | X  |
| Leontaris G., Morales-Nápoles O., Dewan A., Wolfert A.R.M.R. | Decision support for offshore asset construction using expert judgments for supply disruptions risk                   | Automation in construction                            | 2019 | 10.1016/j.autcon.2019.102903       |    |    | X  |
| Lesniak, A; Janowiec, F                                      | Risk Assessment of Additional Works in Railway Construction Investments Using the Bayes Network                       | Sustainability                                        | 2019 | 10.3390/su11195388                 |    |    | X  |
| Leu S.-S., Chang C.-M.                                       | Bayesian-network-based fall risk evaluation of steel construction projects by fault tree transformation               | Journal of civil engineering and management           | 2015 | 10.3846/13923730.2014.890643       |    |    | X  |
| Lew Y.-L., Hassim S., Muniandy R., Hua L.T.                  | Structural equation modelling for subcontracting practice: Malaysia chapter                                           | Engineering construction and architectural management | 2018 | 10.1108/ECAM-04-2017-0073          |    |    | X  |
| Li C., Liu X., Dai Z., Zhao Z.                               | Smart City: A shareable framework and its applications in China                                                       | Sustainability                                        | 2019 | 10.3390/su11164346                 | X  |    |    |
| Li C.-Q., Zhang G., Hosseinian S.M.                          | A fast and accurate method to predict reliability of project completion time                                          | Journal of civil engineering and management           | 2017 | 10.3846/13923730.2014.953570       |    |    | X  |



| Authors                                                            | Article Title                                                                                                                                 | Source Title                                       | Year | DOI                                | C1 | C2 | C3 |
|--------------------------------------------------------------------|-----------------------------------------------------------------------------------------------------------------------------------------------|----------------------------------------------------|------|------------------------------------|----|----|----|
| Li C.Z., Hong J., Fan C., Xu X., Shen G.Q.                         | Schedule delay analysis of prefabricated housing production: A hybrid dynamic approach                                                        | Journal of cleaner production                      | 2018 | 10.1016/j.jclepro.2017.09.066      |    |    | X  |
| Li C.Z., Shen G.Q., Xue F., Luo L., Xu X., Sommer L.               | Schedule risk modeling in prefabrication housing production                                                                                   | Journal of cleaner production                      | 2017 | 10.1016/j.jclepro.2016.11.028      |    |    | X  |
| Li C.Z., Xu X., Shen G.Q., Fan C., Li X., Hong J.                  | A model for simulating schedule risks in prefabrication housing production: A case study of six-day cycle assembly                            | Journal of cleaner production                      | 2018 | 10.1016/j.jclepro.2018.02.308      |    |    | X  |
| Li C.Z., Xue F., Li X., Hong J., Shen G.Q.                         | An Internet of Things-enabled BIM platform for on-site assembly services in prefabricated construction                                        | Automation in construction                         | 2018 | 10.1016/j.autcon.2018.01.001       |    |    | X  |
| Li C.Z., Zhong R.Y., Xue F., Xu G., Chen K., Huang G.G., Shen G.Q. | Integrating RFID and BIM technologies for mitigating risks and improving schedule performance of prefabricated house construction             | Journal of cleaner production                      | 2017 | 10.1016/j.jclepro.2017.07.156      |    |    | X  |
| Li D., Lu M.                                                       | Integrating geometric models, site images and GIS based on Google Earth and Keyhole Markup Language                                           | Automation in construction                         | 2018 | 10.1016/j.autcon.2018.02.002       | X  |    | X  |
| Li D., Lu M.                                                       | Automated Generation of Work Breakdown Structure and Project Network Model for Earthworks Project Planning: A Flow Network-Based Optimization | Journal of construction engineering and management | 2017 | 10.1061/(ASCE)CO.1943-7862.0001214 |    | X  | X  |

| Authors                                                                                 | Article Title                                                                                                                 | Source Title                                          | Year | DOI                                | C1 | C2 | C3 |
|-----------------------------------------------------------------------------------------|-------------------------------------------------------------------------------------------------------------------------------|-------------------------------------------------------|------|------------------------------------|----|----|----|
| Li G., Chen C., Zhang G., Martek I.                                                     | Bid/no-bid decision factors for Chinese international contractors in international construction projects                      | Engineering construction and architectural management | 2019 | 10.1108/ECAM-11-2018-0526          |    |    | X  |
| Li H., Arditi D., Wang Z.                                                               | Determinants of transaction costs in construction projects                                                                    | Journal of civil engineering and management           | 2015 | 10.3846/13923730.2014.897973       |    |    | X  |
| Li H., Chan G., Huang T., Skitmore M., Tao T.Y.E., Luo E., Chung J., Chan X.S., Li Y.F. | Chirp-spread-spectrum-based real time location system for construction safety management: A case study                        | Automation in construction                            | 2015 | 10.1016/j.autcon.2015.03.024       |    |    | X  |
| Li H., Lu M., Chan G., Skitmore M.                                                      | Proactive training system for safe and efficient precast installation                                                         | Automation in construction                            | 2015 | 10.1016/j.autcon.2014.10.010       |    | X  | X  |
| Li H., Wang M., Dong X.                                                                 | Resource Leveling in Projects with Stochastic Minimum Time Lags                                                               | Journal of construction engineering and management    | 2019 | 10.1061/(ASCE)CO.1943-7862.0001635 |    |    | X  |
| Li J., Greenwood D., Kassem M.                                                          | Blockchain in the built environment and construction industry: A systematic review, conceptual models and practical use cases | Automation in construction                            | 2019 | 10.1016/j.autcon.2019.02.005       |    | X  | X  |
| Li J., Liang J., Zuo J., Guo H.                                                         | Environmental impact assessment of mobile recycling of demolition waste in Shenzhen, China                                    | Journal of cleaner production                         | 2020 | 10.1016/j.jclepro.2020.121371      |    |    | X  |
| Li K., Cheung S.O.                                                                      | Alleviating bias to enhance sustainable construction dispute management                                                       | Journal of cleaner production                         | 2020 | 10.1016/j.jclepro.2019.119311      |    |    | X  |
| Li K., Cheung S.O.                                                                      | Unveiling Cognitive Biases in Construction Project Dispute Resolution through the Lenses of Third-Party                       | Journal of construction engineering and management    | 2019 | 10.1061/(ASCE)CO.1943-7862.0001707 |    |    | X  |

| Authors                                    | Article Title                                                                                                           | Source Title                                          | Year | DOI                                | C1 | C2 | C3 |
|--------------------------------------------|-------------------------------------------------------------------------------------------------------------------------|-------------------------------------------------------|------|------------------------------------|----|----|----|
| Li L., Chen K.                             | Quantitative assessment of carbon dioxide emissions in construction projects: A case study in Shenzhen                  | Journal of cleaner production                         | 2017 | 10.1016/j.jclepro.2016.09.134      |    |    | X  |
| Li L., Li Z., Wu G., Li X.                 | Critical success factors for project planning and control in prefabrication housing production: A China study           | Sustainability                                        | 2018 | 10.3390/su10030836                 | X  |    | X  |
| Li N., Fang D., Sun Y.                     | Cognitive Psychological Approach for Risk Assessment in Construction                                                    | Journal of management in engineering                  | 2016 | 10.1061/(ASCE)ME.1943-5479.0000397 |    |    | X  |
| Li Q., Sun Q., Tao S., Gao X.              | Multi-skill project scheduling with skill evolution and cooperation effectiveness                                       | Engineering construction and architectural management | 2019 | 10.1108/ECAM-06-2019-0294          |    |    | X  |
| Li S., Fan M., Wu X.                       | Effect of Social Capital between Construction Supervisors and Workers on Workers' Safety Behavior                       | Journal of construction engineering and management    | 2018 | 10.1061/(ASCE)CO.1943-7862.0001467 |    |    | X  |
| Li X., Song Z., Wang T., Zheng Y., Ning X. | Health impacts of construction noise on workers: A quantitative assessment model based on                               | Journal of cleaner production                         | 2016 | 10.1016/j.jclepro.2016.06.100      |    | X  |    |
| Li X.-J., Zheng Y.-D.                      | Using LCA to research carbon footprint for precast concrete piles during the building construction stage: A China study | Journal of cleaner production                         | 2020 | 10.1016/j.jclepro.2019.118754      |    |    | X  |
| Li X.K., Wang X.M., Lei L.                 | The application of an ANP-Fuzzy comprehensive evaluation model to assess lean construction management performance       | Engineering construction and architectural management | 2019 | 10.1108/ECAM-01-2019-0020          |    |    | X  |

| Authors                                                                   | Article Title                                                                                                                                                           | Source Title                                          | Year | DOI                                | C1 | C2 | C3 |
|---------------------------------------------------------------------------|-------------------------------------------------------------------------------------------------------------------------------------------------------------------------|-------------------------------------------------------|------|------------------------------------|----|----|----|
| Li Y., Ding R., Cui L., Lei Z., Mou J.                                    | The impact of sharing economy practices on sustainability performance in the Chinese construction                                                                       | Resources, conservation and recycling                 | 2019 | 10.1016/j.resconrec.2019.104409    |    | X  |    |
| Li Y., Hu Y., Xia B., Skitmore M., Li H.                                  | Proactive behavior-based system for controlling safety risks in urban highway construction megaprojects                                                                 | Automation in construction                            | 2018 | 10.1016/j.autcon.2018.07.021       |    |    | X  |
| Li Y., Lin J., Cui Z., Wang C., Li G.                                     | Workforce productivity evaluation of the US construction industry from 2006 to 2016                                                                                     | Engineering construction and architectural management | 2019 | 10.1108/ECAM-07-2019-0366          |    | X  | X  |
| Li Y., Liu C.                                                             | Applications of multirotor drone technologies in construction management                                                                                                | International journal of construction management      | 2019 | 10.1080/15623599.2018.1452101      |    |    | X  |
| Li Y., Lu Y., Kwak Y.H., Dong S.                                          | Developing a city-level multi-project management information system for                                                                                                 | International journal of project management           | 2015 | 10.1016/j.ijproman.2014.06.011     |    |    | X  |
| Li Y., Lu Y., Li D., Ma L.                                                | Metanetwork Analysis for Project Task Assignment                                                                                                                        | Journal of construction engineering and management    | 2015 | 10.1061/(ASCE)CO.1943-7862.0001019 |    |    | X  |
| Li Y., Wang X.                                                            | Using fuzzy analytic network process and ism methods for risk assessment of public-private partnership: A china perspective                                             | Journal of civil engineering and management           | 2019 | 10.3846/jcem.2019.8655             |    |    | X  |
| Li Z., Ning K., Chen J., Liu C., Wang D., Nie X., Hu X., Wang L., Wang T. | Soil and water conservation effects driven by the implementation of ecological restoration projects: Evidence from the red soil hilly region of China in the last three | Journal of cleaner production                         | 2020 | 10.1016/j.jclepro.2020.121109      |    |    | X  |

| Authors                                             | Article Title                                                                                                               | Source Title                                       | Year | DOI                                | C1 | C2 | C3 |
|-----------------------------------------------------|-----------------------------------------------------------------------------------------------------------------------------|----------------------------------------------------|------|------------------------------------|----|----|----|
| Li Z., Shen W., Xu J., Lev B.                       | Bilevel and multi-objective dynamic construction site layout and security planning                                          | Automation in construction                         | 2015 | 10.1016/j.autcon.2015.04.011       |    |    | X  |
| Li, CB; Liu, YQ; Li, SK                             | Risk Evaluation of Qinghai-Tibet Power Grid Interconnection Project for Sustainability                                      | Sustainability                                     | 2016 | 10.3390/su8010085                  |    |    | X  |
| Li, CZ; Hong, JK; Xue, F; Shen, GQ; Xu, XX; Mok, MK | Schedule risks in prefabrication housing production in Hong Kong: a                                                         | Journal of cleaner production                      | 2016 | 10.1016/j.jclepro.2016.02.123      |    |    | X  |
| Li, DZ; Li, X; Feng, HB; Wang, Y; Fan, SS           | ISM-based relationship among critical factors that affect the choice of prefabricated concrete                              | International journal of construction management   |      | 10.1080/15623599.2019.1675306      |    |    | X  |
| Li, GH; Zhang, GM; Chen, C; Martek, I               | Empirical Bid or No Bid Decision Process in International Construction Projects: Structural Equation Modeling Framework     | Journal of construction engineering and management | 2020 | 10.1061/(ASCE)CO.1943-7862.0001830 |    |    | X  |
| Li, H; Li, XY; Luo, XC; Siebert, J                  | Investigation of the causality patterns of non-helmet use behavior of construction workers                                  | Automation in construction                         | 2017 | 10.1016/j.autcon.2017.02.006       |    |    | X  |
| Li, H; Yang, XC; Skitmore, M; Wang, FL; Forsythe, P | Automated classification of construction site hazard zones by crowd-sourced integrated density maps                         | Automation in construction                         | 2017 | 10.1016/j.autcon.2017.04.007       |    | X  | X  |
| Li, HY; Zhang, XL; Ng, ST; Skitmore, M              | Quantifying stakeholder influence in decision/evaluations relating to sustainable construction in China - A Delphi approach | Journal of cleaner production                      | 2018 | 10.1016/j.jclepro.2017.04.151      |    |    | X  |

| Authors                                                                                                          | Article Title                                                                                                                                                | Source Title                                       | Year | DOI                                | C1 | C2 | C3 |
|------------------------------------------------------------------------------------------------------------------|--------------------------------------------------------------------------------------------------------------------------------------------------------------|----------------------------------------------------|------|------------------------------------|----|----|----|
| Li, JR; Zuo, J; Cai, H; Zillante, G                                                                              | Construction waste reduction behavior of contractor employees: An extended theory of planned behavior model approach                                         | Journal of cleaner production                      | 2018 | 10.1016/j.jclepro.2017.10.138      |    |    | X  |
| Li, L; Li, ZF; Jiang, L; Wu, GD; Cheng, DJ                                                                       | Enhanced Cooperation among Stakeholders in PPP Mega-Infrastructure Projects: A China Study                                                                   | Sustainability                                     | 2018 | 10.3390/su10082791                 |    |    | X  |
| Li, Q; Yin, ZM; Chong, HY; Shi, QQ                                                                               | Nexus of Interorganizational Trust, Principled Negotiation, and Joint Action for Improved Cost Performance: Survey of Chinese                                | Journal of management in engineering               | 2018 | 10.1061/(ASCE)ME.1943-5479.0000634 |    |    | X  |
| Li, RYM; Chau, KW; Zeng, FFJ                                                                                     | Ranking of Risks for Existing and New Building Works                                                                                                         | Sustainability                                     | 2019 | 10.3390/su11102863                 |    |    | X  |
| Li, THY; Ng, ST; Skitmore, M                                                                                     | Modeling Multi-Stakeholder Multi-Objective Decisions during Public Participation in Major Infrastructure and Construction Projects: A Decision Rule Approach | Journal of construction engineering and management | 2016 | 10.1061/(ASCE)CO.1943-7862.0001066 |    |    | X  |
| Li, X; Wu, CK; Wu, P; Xiang, LQ; Shen, GQ; Vick, S; Li, CZ                                                       | SWP-enabled constraints modeling for on-site assembly process of prefabrication housing                                                                      | Journal of cleaner production                      | 2019 | 10.1016/j.jclepro.2019.117991      |    |    | X  |
| Li, X; Yin, DQ; Zhang, XJ; Croke, BFW; Guo, DH; Liu, JH; Jakeman, AJ; Zhu, RR; Zhang, L; Mu, XP; Xu, FR; Wang, Q | Mapping the Distribution of Water Resource Security in the Beijing-Tianjin-Hebei Region at the County Level under a Changing Context                         | Sustainability                                     | 2019 | 10.3390/su11226463                 |    |    | X  |

| Authors                                | Article Title                                                                                                                | Source Title                                          | Year | DOI                                | C1 | C2 | C3 |
|----------------------------------------|------------------------------------------------------------------------------------------------------------------------------|-------------------------------------------------------|------|------------------------------------|----|----|----|
| Li, Y; Ding, RG; Sun, T                | The Drivers and Performance of Environmental Practices in the Chinese Construction Industry                                  | Sustainability                                        | 2019 | 10.3390/su11030614                 |    |    | X  |
| Li, Y; Huang, SL                       | Landscape Ecological Risk Responses to Land Use Change in the Luanhe River Basin, China                                      | Sustainability                                        | 2015 | 10.3390/su71215835                 |    |    | X  |
| Li, Y; Li, HX; Huang, JX; Liu, CL      | An approximation method for evaluating flash flooding mitigation of sponge city strategies - A case study of Central Geelong | Journal of cleaner production                         | 2020 | 10.1016/j.jclepro.2020.120525      |    |    | X  |
| Li, YJ; He, N; Li, HM; Liu, ZQ; Qi, JY | Influencing factors on inter-organizational trust asymmetry behavior in construction projects                                | Engineering construction and architectural management |      | 10.1108/ECAM-05-2019-0256          |    |    | X  |
| Li, ZQ; Tan, HC; Anumba, C; Chia, FC   | Development of a web-based system for managing suppliers' performance and knowledge sharing in                               | Built environment project and asset management        | 2017 | 10.1108/BEPAM-10-2015-0061         | X  |    | X  |
| Lian J.K.M., Ling F.Y.Y.               | The influence of personal characteristics on quantity surveyors' job satisfaction                                            | Built environment project and asset management        | 2018 | 10.1108/BEPAM-12-2017-0117         |    |    | X  |
| Liang Q., Leung M.-Y., Cooper C.       | Focus Group Study to Explore Critical Factors for Managing Stress of                                                         | Journal of construction engineering and management    | 2018 | 10.1061/(ASCE)CO.1943-7862.0001477 |    |    | X  |
| Liang, R; Chong, HY                    | A hybrid group decision model for green supplier selection: a case study of                                                  | Engineering construction and architectural management | 2019 | 10.1108/ECAM-10-2018-0462          |    |    | X  |

| Authors                             | Article Title                                                                                                                                            | Source Title                                          | Year | DOI                                | C1 | C2 | C3 |
|-------------------------------------|----------------------------------------------------------------------------------------------------------------------------------------------------------|-------------------------------------------------------|------|------------------------------------|----|----|----|
| Liang, YH; Wang, HD                 | Sustainable Performance Measurements for Public-Private Partnership Projects: Empirical Evidence from                                                    | Sustainability                                        | 2019 | 10.3390/su11133653                 |    |    | X  |
| Liao L., Teo E.A.L.                 | Managing critical drivers for building information modelling implementation in the Singapore construction industry: an organizational change perspective | International journal of construction management      | 2019 | 10.1080/15623599.2017.1423165      |    |    | X  |
| Liao P.-C., Lei G., Xue J., Fang D. | Influence of person-organizational fit on construction safety climate                                                                                    | Journal of management in engineering                  | 2015 | 10.1061/(ASCE)ME.1943-5479.0000257 |    |    | X  |
| Liao X., Lee C.Y., Chong H.-Y.      | Contractual practices between the consultant and employer in Chinese BIM-enabled construction projects                                                   | Engineering construction and architectural management | 2019 | 10.1108/ECAM-02-2019-0110          |    |    | X  |
| Liao, LH; Lin, ETA; Low, SP         | Assessing building information modeling implementation readiness in building projects in Singapore A fuzzy synthetic                                     | Engineering construction and architectural management | 2020 | 10.1108/ECAM-01-2019-0028          |    |    | X  |
| Liao, LH; Teo, EAL                  | CRITICAL SUCCESS FACTORS FOR ENHANCING THE BUILDING INFORMATION MODELLING IMPLEMENTATION IN BUILDING PROJECTS IN SINGAPORE                               | Journal of civil engineering and management           | 2017 | 10.3846/13923730.2017.1374300      |    |    | X  |



| Authors                                                | Article Title                                                                                                           | Source Title                                       | Year | DOI                                | C1 | C2 | C3 |
|--------------------------------------------------------|-------------------------------------------------------------------------------------------------------------------------|----------------------------------------------------|------|------------------------------------|----|----|----|
| Liao, LH; Teo, EAL                                     | Organizational Change Perspective on People Management in BIM Implementation in Building Projects                       | Journal of management in engineering               | 2018 | 10.1061/(ASCE)ME.1943-5479.0000604 |    |    | X  |
| Liao, LH; Teo, EAL; Chang, RD; Li, LH                  | Investigating Critical Non-Value Adding Activities and Their Resulting Wastes in BIM-Based Project Delivery             | Sustainability                                     | 2020 | 10.3390/su12010355                 |    |    | X  |
| Liao, PC; Xia, NN; Wu, CL; Zhang, XL; Yeh, JL          | Communicating the corporate social responsibility (CSR) of international contractors: Content analysis of CSR reporting | Journal of cleaner production                      | 2017 | 10.1016/j.jclepro.2017.04.027      |    |    | X  |
| Lieftink B., Smits A., Lauche K.                       | Dual dynamics: Project-based institutional work and subfield differences in the Dutch construction industry             | International journal of project management        | 2019 | 10.1016/j.ijproman.2018.03.005     |    |    | X  |
| Lijauco, F; Gajendran, T; Brewer, G; Rasoolimanesh, SM | Impacts of Culture on Innovation Propensity in Small to Medium Enterprises in Construction                              | Journal of construction engineering and management | 2020 | 10.1061/(ASCE)CO.1943-7862.0001753 |    |    | X  |
| Lim B.T.H., Loosemore M.                               | The effect of inter-organizational justice perceptions on organizational citizenship behaviors in construction projects | International journal of project management        | 2017 | 10.1016/j.ijproman.2016.10.016     |    |    | X  |
| Lim, H; Lee, JW; Kim, T; Cho, K; Cho, H                | Economic Analysis of USN-Based Data Acquisition Systems in Tall Building Construction                                   | Sustainability                                     | 2017 | 10.3390/su9081360                  |    |    | X  |

| Authors                                | Article Title                                                                                           | Source Title                                          | Year | DOI                                | C1 | C2 | C3 |
|----------------------------------------|---------------------------------------------------------------------------------------------------------|-------------------------------------------------------|------|------------------------------------|----|----|----|
| Lin C.-L., Fan C.-L.                   | Examining association between construction inspection grades and critical defects using data mining and | Journal of civil engineering and management           | 2018 | 10.3846/jcem.2018.3072             |    |    | X  |
| Lin S.-C.                              | An Analysis for Construction Engineering Networks                                                       | Journal of construction engineering and management    | 2015 | 10.1061/(ASCE)CO.1943-7862.0000956 |    |    | X  |
| Lin Y.-C.                              | Use of BIM approach to enhance construction interface management: A                                     | Journal of civil engineering and management           | 2015 | 10.3846/13923730.2013.802730       |    |    | X  |
| Lin Y.-C., Chang J.-X., Su Y.-C.       | Developing construction defect management system using BIM technology in                                | Journal of civil engineering and management           | 2016 | 10.3846/13923730.2014.928362       |    |    | X  |
| Lin Y.-C., Lee H.-Y., Yang I.-T.       | Developing as-built BIM model process management system for general contractors: A case study           | Journal of civil engineering and management           | 2016 | 10.3846/13923730.2014.914081       |    |    | X  |
| Lin Y.-C., Prof., Cheung W.-F.         | Developing WSN/BIM-Based Environmental Monitoring Management System for Parking Garages in Smart        | Journal of management in engineering                  | 2020 | 10.1061/(ASCE)ME.1943-5479.0000760 |    |    | X  |
| Lin, CL; Jeng, CH                      | Exploring Interface Problems in Taiwan's Construction Projects Using Structural Equation Modeling       | Sustainability                                        | 2017 | 10.3390/su9050822                  |    |    | X  |
| Lin, CL; Lai, YC                       | AN IMPROVED TIME-COST TRADE-OFF MODEL WITH OPTIMAL LABOR PRODUCTIVITY                                   | Journal of civil engineering and management           | 2020 | 10.3846/jcem.2020.11663            |    |    | X  |
| Lin, ETA; Ofori, G; Tjandra, I; Kim, H | Framework for productivity and safety enhancement system using BIM in                                   | Engineering construction and architectural management | 2017 | 10.1108/ECAM-05-2016-0122          |    |    | X  |

| Authors                                                                        | Article Title                                                                                                                          | Source Title                                             | Year | DOI                                | C1 | C2 | C3 |
|--------------------------------------------------------------------------------|----------------------------------------------------------------------------------------------------------------------------------------|----------------------------------------------------------|------|------------------------------------|----|----|----|
| Lin, H; Zeng, SX; Ma, HY;<br>Zeng, RC; Tam, VWY                                | An indicator system for<br>evaluating megaproject social<br>responsibility                                                             | International journal of<br>project management           | 2017 | 10.1016/j.ijproman.2017.04.009     |    |    | X  |
| Lin, TH; Liu, CH; Tsai, MH;<br>Kang, SC                                        | Using Augmented Reality in<br>a Multiscreen Environment<br>for Construction Discussion                                                 | Journal of computing in civil<br>engineering             | 2015 | 10.1061/(ASCE)CP.1943-5487.0000420 | X  |    |    |
| Lin, X; Ho, CMF; Shen, GQP                                                     | Who should take the<br>responsibility? Stakeholders'<br>power over social<br>responsibility issues in                                  | Journal of cleaner production                            | 2017 | 10.1016/j.jclepro.2017.04.007      |    |    | X  |
| Lin, X; McKenna, B; Ho,<br>CMF; Shen, GQP                                      | Stakeholders' influence<br>strategies on social<br>responsibility implementation<br>in construction projects                           | Journal of cleaner production                            | 2019 | 10.1016/j.jclepro.2019.06.253      |    |    | X  |
| Lin, XH; Ren, J; Xu, JC;<br>Zheng, T; Cheng, W; Qiao,<br>JL; Huang, JW; Li, GM | Prediction of Life Cycle<br>Carbon Emissions of Sponge<br>City Projects: A Case Study<br>in Shanghai, China                            | Sustainability                                           | 2018 | 10.3390/su10113978                 |    |    | X  |
| Lindblad H.                                                                    | Black boxing BIM: the public<br>client's strategy in BIM<br>implementation                                                             | Construction management<br>and economics                 | 2019 | 10.1080/01446193.2018.1472385      |    | X  |    |
| Lindblad, H; Guerrero, JR                                                      | Client's role in promoting<br>BIM implementation and<br>innovation in construction                                                     | Construction management<br>and economics                 | 2020 | 10.1080/01446193.2020.1716989      |    |    | X  |
| Lindgren J., Emmitt S.,<br>Widén K.                                            | Construction projects as<br>mechanisms for knowledge<br>integration: Mechanisms and<br>effects when diffusing a<br>systemic innovation | Engineering construction and<br>architectural management | 2018 | 10.1108/ECAM-02-2017-0022          |    |    | X  |
| Lindhard S., Larsen J.K.                                                       | Identifying the key process<br>factors affecting project<br>performance                                                                | Engineering construction and<br>architectural management | 2016 | 10.1108/ECAM-08-2015-0123          |    |    | X  |

| Authors                                                                  | Article Title                                                                                                                       | Source Title                                                       | Year | DOI                                | C1 | C2 | C3 |
|--------------------------------------------------------------------------|-------------------------------------------------------------------------------------------------------------------------------------|--------------------------------------------------------------------|------|------------------------------------|----|----|----|
| Lines B.C., Perrenoud A.,<br>Sullivan K.T., Smithwick J.                 | Implementing New Project<br>Delivery Strategies:<br>Development of a Web-<br>Based Multimedia Tool to<br>Support Owner Project Team | International journal of<br>construction education and<br>research | 2015 | 10.1080/15578771.2014.930541       | X  |    |    |
| Lines B.C., Perrenoud A.J.,<br>Sullivan K.T., Kashiwag<br>D.T., Pesek A. | Implementing Project<br>Delivery Process<br>Improvements: Identification<br>of Resistance Types and                                 | Journal of management in<br>engineering                            | 2017 | 10.1061/(ASCE)ME.1943-5479.0000480 |    |    | X  |
| Lines B.C., Ravi Kumar G.G.                                              | Developing More<br>Competitive Proposals:<br>Relationship between<br>Contractor Qualifications-<br>Based Proposal Content and       | Journal of construction<br>engineering and management              | 2018 | 10.1061/(ASCE)CO.1943-7862.0001479 |    |    | X  |
| Lines B.C., Sullivan K.T.,<br>Smithwick J.B., Mischung J.                | Overcoming resistance to<br>change in engineering and<br>construction: Change<br>management factors for<br>owner organizations      | International journal of<br>project management                     | 2015 | 10.1016/j.ijproman.2015.01.008     |    |    | X  |
| Lines B.C., Sullivan K.T.,<br>Wiesel A.                                  | Support for organizational<br>change: Change-readiness<br>outcomes among AEC<br>project teams                                       | Journal of construction<br>engineering and management              | 2016 | 10.1061/(ASCE)CO.1943-7862.0001043 |    |    | X  |
| Ling F.Y.Y., Loo C.M.C.                                                  | Characteristics of jobs and<br>jobholders that affect job<br>satisfaction and work<br>performance of project<br>managers            | Journal of management in<br>engineering                            | 2015 | 10.1061/(ASCE)ME.1943-5479.0000247 |    |    | X  |
| Ling F.Y.Y., Zhang Z., Wong<br>W.T.                                      | How personality traits<br>influence management styles<br>of construction project                                                    | Built environment project<br>and asset management                  | 2020 | 10.1108/BEPAM-09-2019-0086         |    |    | X  |
| Ling, FYY; Khoo, WW                                                      | Improving relationships in<br>project teams in Malaysia                                                                             | Built environment project<br>and asset management                  | 2016 | 10.1108/BEPAM-04-2015-0014         | X  |    | X  |

| Authors                                                                                       | Article Title                                                                                                                                                               | Source Title                                          | Year | DOI                           | C1 | C2 | C3 |
|-----------------------------------------------------------------------------------------------|-----------------------------------------------------------------------------------------------------------------------------------------------------------------------------|-------------------------------------------------------|------|-------------------------------|----|----|----|
| Ling, FYY; Ning, Y; Chang, YH; Zhang, Z                                                       | Human resource management practices to improve project managers' job satisfaction                                                                                           | Engineering construction and architectural management | 2018 | 10.1108/ECAM-02-2017-0030     |    |    | X  |
| Lingard H., Turner M.                                                                         | Improving the health of male, blue collar construction workers: a social ecological                                                                                         | Construction management and economics                 | 2015 | 10.1080/01446193.2014.997259  |    | X  |    |
| Lingard H., Warmerdam A., Shooshtarian S.                                                     | Getting the balance right: Regulating occupational health and safety planning and coordination in the Australian construction                                               | Engineering construction and architectural management | 2019 | 10.1108/ECAM-02-2018-0086     |    | X  | X  |
| Lingard H., Zhang R.P., Blismas N., Wakefield R., Kleiner B.                                  | Are we on the same page? Exploring construction professionals' mental models of occupational health and                                                                     | Construction management and economics                 | 2015 | 10.1080/01446193.2015.1016541 |    | X  |    |
| Lingard H., Zhang R.P., Oswald D.                                                             | Effect of leadership and communication practices on the safety climate and behaviour of construction                                                                        | Engineering construction and architectural management | 2019 | 10.1108/ECAM-01-2018-0015     |    |    | X  |
| Lingard, H; Oswald, D; Le, TD                                                                 | Embedding occupational health and safety in the procurement and management of infrastructure projects: institutional logics at play in the context of new public management | Construction management and economics                 | 2019 | 10.1080/01446193.2018.1551617 |    | X  | X  |
| Linner T., Pan W., Hu R., Zhao C., Iturralde K., Taghavi M., Trummer J., Schlandt M., Bock T. | A technology management system for the development of single-task construction robots                                                                                       | Construction innovation                               | 2020 | 10.1108/CI-06-2019-0053       |    | X  |    |

| Authors                                                      | Article Title                                                                                                                                       | Source Title                                             | Year | DOI                                | C1 | C2 | C3 |
|--------------------------------------------------------------|-----------------------------------------------------------------------------------------------------------------------------------------------------|----------------------------------------------------------|------|------------------------------------|----|----|----|
| Liu B., Huo T., Shen Q.,<br>Yang Z., Meng J., Xue B.         | Which owner characteristics<br>are key factors affecting<br>project delivery system<br>decision making? empirical<br>analysis based on the rough    | Journal of management in<br>engineering                  | 2015 | 10.1061/(ASCE)ME.1943-5479.0000298 |    |    | X  |
| Liu B., Xue B., Huo T., Shen<br>G., Fu M.                    | Project external<br>environmental factors<br>affecting project delivery                                                                             | Journal of civil engineering<br>and management           | 2019 | 10.3846/jcem.2019.7460             |    |    | X  |
| Liu B., Yang X., Huo T.,<br>Shen G.Q., Wang X.               | A linguistic group decision-<br>making framework for bid<br>evaluation in mega public<br>projects considering carbon<br>dioxide emissions reduction | Journal of cleaner production                            | 2017 | 10.1016/j.jclepro.2017.02.044      |    |    | X  |
| Liu C., Ji W., Abourizk S.M.,<br>Siu M.-F.F.                 | Equipment Logistics<br>Performance Measurement<br>Using Data-Driven Social<br>Network Analysis                                                      | Journal of construction<br>engineering and management    | 2019 | 10.1061/(ASCE)CO.1943-7862.0001659 |    |    | X  |
| Liu J., Cui Z., Feng Y.,<br>Perera S., Han J.                | Impact of culture differences<br>on performance of<br>international construction<br>joint ventures: the<br>moderating role of conflict              | Engineering construction and<br>architectural management | 2020 | 10.1108/ECAM-02-2019-0111          |    |    | X  |
| Liu J., Lin S., Feng Y.                                      | Understanding why Chinese<br>contractors are not willing to<br>purchase construction                                                                | Engineering construction and<br>architectural management | 2018 | 10.1108/ECAM-08-2016-0186          |    |    | X  |
| Liu J., Love P.E.D., Smith J.,<br>Regan M., Palaneeswaran E. | Review of performance<br>measurement: Implications<br>for public-private                                                                            | Built environment project<br>and asset management        | 2015 | 10.1108/BEPAM-12-2013-0070         |    |    | X  |
| Liu J., Lu M.                                                | Constraint Programming<br>Approach to Optimizing<br>Project Schedules under<br>Material Logistics and Crew<br>Availability Constraints              | Journal of construction<br>engineering and management    | 2018 | 10.1061/(ASCE)CO.1943-7862.0001507 |    |    | X  |

| Authors                                            | Article Title                                                                                                                                                                     | Source Title                                          | Year | DOI                                | C1 | C2 | C3 |
|----------------------------------------------------|-----------------------------------------------------------------------------------------------------------------------------------------------------------------------------------|-------------------------------------------------------|------|------------------------------------|----|----|----|
| Liu J., Lu M.                                      | Synchronized Optimization of Various Management-Function Schedules in a Multiproject Environment: Case Study of Planning Steel Girder Fabrication Projects in Bridge Construction | Journal of construction engineering and management    | 2020 | 10.1061/(ASCE)CO.1943-7862.0001813 |    |    | X  |
| Liu J., Meng F., Fellows R.                        | An exploratory study of understanding project risk management from the perspective of national                                                                                    | International journal of project management           | 2015 | 10.1016/j.ijproman.2014.08.004     |    |    | X  |
| Liu J., Xie Q., Xia B., Bridge A.J.                | Impact of Design Risk on the Performance of Design-Build Projects                                                                                                                 | Journal of construction engineering and management    | 2017 | 10.1061/(ASCE)CO.1943-7862.0001299 |    |    | X  |
| Liu J., Yang P., Xia B., Skitmore M.               | Effect of Perceived Justice on Subcontractor Willingness to Cooperate: The Mediating Role of Relationship Value                                                                   | Journal of construction engineering and management    | 2017 | 10.1061/(ASCE)CO.1943-7862.0001350 |    |    | X  |
| Liu L., Han C., Xu W.                              | Evolutionary analysis of the National Quality Award Projects of China                                                                                                             | International journal of project management           | 2015 | 10.1016/j.ijproman.2014.11.003     |    |    | X  |
| Liu M., Le Y., Hu Y., Xia B., Skitmore M., Gao X.  | System dynamics modeling for construction management research: Critical review and future trends                                                                                  | Journal of civil engineering and management           | 2019 | 10.3846/jcem.2019.10518            |    |    | X  |
| Liu N., Ruan L., Jin R., Chen Y., Deng X., Yang T. | Investigation of individual perceptions towards BIM implementation-a Chongqing case study                                                                                         | Engineering construction and architectural management | 2019 | 10.1108/ECAM-08-2018-0342          | X  |    | X  |
| Liu Q., Ye G., Feng Y., Wang C., Peng Y.           | Case-based insights into rework costs of residential building projects in China                                                                                                   | International journal of construction management      | 2020 | 10.1080/15623599.2018.1484856      |    |    | X  |

| Authors                                                                                          | Article Title                                                                                                                                                             | Source Title                                          | Year | DOI                                | C1 | C2 | C3 |
|--------------------------------------------------------------------------------------------------|---------------------------------------------------------------------------------------------------------------------------------------------------------------------------|-------------------------------------------------------|------|------------------------------------|----|----|----|
| Liu S., Jin H., Liu C., Xie B., Mills A.                                                         | Government compensation and costs of non-competition guarantee for PPP rental retirement villages                                                                         | Engineering construction and architectural management | 2019 | 10.1108/ECAM-01-2019-0063          |    |    | X  |
| Liu S.Y., Zhang G.X., Han M.Y., Wu X.D., Li Y.L., Chen K., Meng J., Shao L., Wei W.D., Chen G.Q. | Freshwater costs of seawater desalination: Systems process analysis for the case plant in China                                                                           | Journal of cleaner production                         | 2019 | 10.1016/j.jclepro.2018.12.012      |    |    | X  |
| Liu X., Song Y., Yi W., Wang X., Zhu J.                                                          | Comparing the Random Forest with the Generalized Additive Model to Evaluate the Impacts of Outdoor Ambient Environmental Factors on Scaffolding Construction Productivity | Journal of construction engineering and management    | 2018 | 10.1061/(ASCE)CO.1943-7862.0001495 |    |    | X  |
| Liu X., Wang X., Prof., Zhao Y., Xia N., Guo S.                                                  | Solving Workplace Deviant Behavior in Construction by Leader-Member Exchange and Leader-Member Guanxi                                                                     | Journal of construction engineering and management    | 2020 | 10.1061/(ASCE)CO.1943-7862.0001859 |    |    | X  |
| Liu Y., Zhong D., Cui B., Zhong G., Wei Y.                                                       | Study on real-time construction quality monitoring of storehouse                                                                                                          | Automation in construction                            | 2015 | 10.1016/j.autcon.2014.10.003       |    |    | X  |
| Liu Z., Adams M., Cote R.P., Geng Y., Li Y.                                                      | Comparative study on the pathways of industrial parks towards sustainable development between China and Canada                                                            | Resources, conservation and recycling                 | 2018 | 10.1016/j.resconrec.2016.06.012    |    | X  |    |
| Liu Z., Wang H., Li H.                                                                           | Model of Equipment Sharing between Contractors on Construction Projects                                                                                                   | Journal of construction engineering and management    | 2018 | 10.1061/(ASCE)CO.1943-7862.0001485 |    |    | X  |



| Authors                                               | Article Title                                                                                                                                                                        | Source Title                                          | Year | DOI                                | C1 | C2 | C3 |
|-------------------------------------------------------|--------------------------------------------------------------------------------------------------------------------------------------------------------------------------------------|-------------------------------------------------------|------|------------------------------------|----|----|----|
| Liu Z., Yang L., Deng R., Tian J.                     | An effective approach with feasible space decomposition to solve resource-constrained project scheduling problems                                                                    | Automation in construction                            | 2017 | 10.1016/j.autcon.2016.11.012       |    |    | X  |
| Liu Z.-Z., Zhu Z.-W., Wang H.-J., Huang J.            | Handling social risks in government-driven mega project: An empirical case study from West China                                                                                     | International journal of project management           | 2016 | 10.1016/j.ijproman.2015.11.003     |    |    | X  |
| Liu, BS; Huo, TF; Meng, JN; Gong, J; Shen, QP; Sun, T | Identification of Key Contractor Characteristic Factors That Affect Project Success under Different Project Delivery Systems: Empirical Analysis Based on a Group of Data from China | Journal of management in engineering                  | 2016 | 10.1061/(ASCE)ME.1943-5479.0000388 |    |    | X  |
| Liu, BS; Li, Y; Xue, B; Li, Q; Zou, PXW; Li, L        | Why do individuals engage in collective actions against major construction projects? - An empirical analysis based on Chinese data                                                   | International journal of project management           | 2018 | 10.1016/j.ijproman.2018.02.004     |    |    | X  |
| Liu, BS; Xue, B; Meng, JN; Chen, XB; Sun, T           | How project management practices lead to infrastructure sustainable success: an empirical study based on goal-setting theory                                                         | Engineering construction and architectural management |      | 10.1108/ECAM-08-2019-0463          |    |    | X  |
| Liu, CW; Wu, TH; Tsai, MH; Kang, SC                   | Image-based semantic construction reconstruction                                                                                                                                     | Automation in construction                            | 2018 | 10.1016/j.autcon.2018.02.016       |    |    | X  |

| Authors                                    | Article Title                                                                                                                                                 | Source Title                                             | Year | DOI                                | C1 | C2 | C3 |
|--------------------------------------------|---------------------------------------------------------------------------------------------------------------------------------------------------------------|----------------------------------------------------------|------|------------------------------------|----|----|----|
| Liu, H; Skibniewski, MJ;<br>Wang, MJ       | IDENTIFICATION AND<br>HIERARCHICAL<br>STRUCTURE OF<br>CRITICAL SUCCESS<br>FACTORS FOR<br>INNOVATION IN<br>CONSTRUCTION<br>PROJECTS: CHINESE                   | Journal of civil engineering<br>and management           | 2016 | 10.3846/13923730.2014.975739       |    |    | X  |
| Liu, HL; Song, JL; Wang,<br>GB             | Development of a tool for<br>measuring building<br>information modeling (BIM)<br>user satisfaction - method<br>selection, scale development<br>and case study | Engineering construction and<br>architectural management |      | 10.1108/ECAM-08-2019-0448          |    |    | X  |
| Liu, HX; Al-Hussein, M; Lu,<br>M           | BIM-based integrated<br>approach for detailed<br>construction scheduling<br>under resource constraints                                                        | Automation in construction                               | 2015 | 10.1016/j.autcon.2015.03.008       |    |    | X  |
| Liu, JY; Li, HL; Skitmore,<br>M; Zhang, YB | Experience mining based on<br>case-based reasoning for<br>dispute settlement of<br>international construction<br>projects                                     | Automation in construction                               | 2019 | 10.1016/j.autcon.2018.11.006       |    |    | X  |
| Liu, JY; Low, SP; Wang, LF                 | Critical success factors for<br>eco-city development in                                                                                                       | International journal of<br>construction management      | 2018 | 10.1080/15623599.2017.1351731      |    |    | X  |
| Liu, JY; Low, SP; Zhang, Q                 | Enterprise risk management<br>practices of top ENR<br>international contractors                                                                               | International journal of<br>construction management      | 2018 | 10.1080/15623599.2017.1326299      |    |    | X  |
| Liu, JY; Wang, ZX;<br>Skitmore, M; Yan, L  | How Contractor Behavior<br>Affects Engineering Project<br>Value-Added Performance                                                                             | Journal of management in<br>engineering                  | 2019 | 10.1061/(ASCE)ME.1943-5479.0000695 |    |    | X  |

| Authors                                           | Article Title                                                                                                                                         | Source Title                                | Year | DOI                                | C1 | C2 | C3 |
|---------------------------------------------------|-------------------------------------------------------------------------------------------------------------------------------------------------------|---------------------------------------------|------|------------------------------------|----|----|----|
| Liu, KN; Su, YK; Zhang, SJ                        | Evaluating Supplier Management Maturity in Prefabricated Construction Project-Survey Analysis in China                                                | Sustainability                              | 2018 | 10.3390/su10093046                 |    |    | X  |
| Liu, M; Chong, HY; Liao, PC; Xu, LY               | Probabilistic-Based Cascading Failure Approach to Assessing Workplace Hazards Affecting Human                                                         | Journal of management in engineering        | 2019 | 10.1061/(ASCE)ME.1943-5479.0000690 |    |    | X  |
| Liu, WL; Wu, XG; Zhang, LM; Wang, YY; Teng, JY    | Sensitivity analysis of structural health risk in                                                                                                     | Automation in construction                  | 2018 | 10.1016/j.autcon.2018.06.008       |    |    | X  |
| Liu, Y; Van Nederveen, S; Hertogh, M              | Understanding effects of BIM on collaborative design and construction: An empirical study in China                                                    | International journal of project management | 2017 | 10.1016/j.ijproman.2016.06.007     |    |    | X  |
| Liu, YY; Wang, YQ; Li, D; Feng, F; Yu, Q; Xue, SQ | Identification of the potential for carbon dioxide emissions reduction from highway maintenance projects using life cycle assessment: A case in China | Journal of cleaner production               | 2019 | 10.1016/j.jclepro.2019.02.081      |    | X  |    |
| Liu, ZR; Jiang, WD; Wu, YZ; Peng, Y               | Risk Factors of Building Apartments for University Talent through the Agent Construction Mode in China: Interrelationship and Prioritization          | Sustainability                              | 2016 | 10.3390/su8040325                  |    |    | X  |
| Locatelli, G; Mariani, G; Sainati, T; Greco, M    | Corruption in public projects and megaprojects: There is an elephant in the room!                                                                     | International journal of project management | 2017 | 10.1016/j.ijproman.2016.09.010     |    |    | X  |

| Authors                                           | Article Title                                                                                                            | Source Title                                          | Year | DOI                                | C1 | C2 | C3 |
|---------------------------------------------------|--------------------------------------------------------------------------------------------------------------------------|-------------------------------------------------------|------|------------------------------------|----|----|----|
| London, K; Pablo, Z                               | An actor-network theory approach to developing an expanded conceptualization of collaboration in industrialized building | Construction management and economics                 | 2017 | 10.1080/01446193.2017.1339361      |    |    | X  |
| Long, Y; Wang, Y; Pan, CR                         | Auction Mechanism of Micro-Grid Project Transfer                                                                         | Sustainability                                        | 2017 | 10.3390/su9101895                  |    |    | X  |
| Loosemore M.                                      | Social procurement in UK construction projects                                                                           | International journal of project management           | 2016 | 10.1016/j.ijproman.2015.10.005     |    |    | X  |
| Loosemore M., Braham R., Yiming Y., Bronkhorst C. | Relational determinants of construction project outcomes: a social network                                               | Construction management and economics                 | 2020 | 10.1080/01446193.2020.1776350      |    |    | X  |
| Loosemore M., Bridgeman J.                        | Corporate volunteering in the construction industry: motivations, costs and                                              | Construction management and economics                 | 2017 | 10.1080/01446193.2017.1315150      |    | X  | X  |
| Loosemore M., Cheung E.                           | Implementing systems thinking to manage risk in public private partnership                                               | International journal of project management           | 2015 | 10.1016/j.ijproman.2015.02.005     |    |    | X  |
| Loosemore M., Higgon D., Osborne J.               | Managing new social procurement imperatives in the Australian construction                                               | Engineering construction and architectural management | 2020 | 10.1108/ECAM-11-2019-0643          |    |    | X  |
| Loosemore M., Reid S.                             | The social procurement practices of tier-one construction contractors in Australia                                       | Construction management and economics                 | 2019 | 10.1080/01446193.2018.1505048      |    |    | X  |
| Lopes J.P., Oliveira R.A., Abreu M.I.             | Estimating the built environment stock in Cape                                                                           | Engineering construction and architectural management | 2019 | 10.1108/ECAM-05-2018-0190          |    | X  |    |
| Lopez R., Chong H.-Y., Wang X., Graham J.         | Technical Review: Analysis and Appraisal of Four-Dimensional Building Information Modeling Usability in Construction and | Journal of construction engineering and management    | 2016 | 10.1061/(ASCE)CO.1943-7862.0001094 |    |    | X  |

| Authors                                                            | Article Title                                                                                                               | Source Title                                          | Year | DOI                                | C1 | C2 | C3 |
|--------------------------------------------------------------------|-----------------------------------------------------------------------------------------------------------------------------|-------------------------------------------------------|------|------------------------------------|----|----|----|
| Lopez, R; Chong, HY; Moon, S; Wang, XY                             | CASE STUDY ON SUBCONTRACTING ARRANGEMENTS IN THE SCAFFOLDING SUPPLY CHAIN OF A LIQUEFIED NATURAL GAS INFRASTRUCTURE PROJECT | Journal of civil engineering and management           | 2017 | 10.3846/13923730.2017.1388277      |    |    | X  |
| Loudoun R., Townsend K.                                            | Implementing health promotion programs in the Australian construction industry Levers and agents                            | Engineering construction and architectural management | 2017 | 10.1108/ECAM-09-2015-0140          |    |    | X  |
| Low W.W., Wong K.S., Lee J.L.                                      | Cost-influencing risk factors in infrastructure projects on soft soils                                                      | International journal of construction management      | 2019 | 10.1080/15623599.2019.1617092      |    |    | X  |
| Low, SP; Gao, S; Ng, EWL                                           | Future-ready project and facility management graduates in Singapore for industry 4.0 Transforming mindsets and competencies | Engineering construction and architectural management |      | 10.1108/ECAM-08-2018-0322          |    | X  | X  |
| Love P.E., Zhou J., Matthews J., Sing C.-P., Carey B.              | A systems information model for managing electrical, control, and instrumentation                                           | Built environment project and asset management        | 2015 | 10.1108/BEPAM-03-2014-0019         |    |    | X  |
| Love P.E.D., Ackermann F., Carey B., Morrison J., Ward M., Park A. | Praxis of rework mitigation in construction                                                                                 | Journal of management in engineering                  | 2016 | 10.1061/(ASCE)ME.1943-5479.0000442 |    |    | X  |
| Love P.E.D., Liu J., Matthews J., Sing C.-P., Smith J.             | Future proofing PPPs: Life-cycle performance measurement and Building Information Modelling                                 | Automation in construction                            | 2015 | 10.1016/j.autcon.2015.04.008       |    |    | X  |

| Authors                                                      | Article Title                                                                                                     | Source Title                                       | Year | DOI                                | C1 | C2 | C3 |
|--------------------------------------------------------------|-------------------------------------------------------------------------------------------------------------------|----------------------------------------------------|------|------------------------------------|----|----|----|
| Love P.E.D., Matthews J.                                     | The 'how' of benefits management for digital technology: From engineering to asset                                | Automation in construction                         | 2019 | 10.1016/j.autcon.2019.102930       |    |    | X  |
| Love P.E.D., Smith J., Ackermann F., Irani Z.                | Making sense of rework and its unintended consequence in projects: The emergence of uncomfortable knowledge       | International journal of project management        | 2019 | 10.1016/j.ijproman.2019.02.004     |    |    | X  |
| Love P.E.D., Teo P., Morrison J., Grove M.                   | Quality and Safety in Construction: Creating a No-Harm Environment                                                | Journal of construction engineering and management | 2016 | 10.1061/(ASCE)CO.1943-7862.0001133 |    |    | X  |
| Love P.E.D., Zhou J., Matthews J.                            | Project controls for electrical, instrumentation and control systems: Enabling role of digital system information | Automation in construction                         | 2019 | 10.1016/j.autcon.2019.03.010       |    |    | X  |
| Love P.E.D., Zhou J., Matthews J., Lou H.                    | Object oriented modeling: Retrospective systems information model for constructability assessment                 | Automation in construction                         | 2016 | 10.1016/j.autcon.2016.08.032       |    | X  |    |
| Love P.E.D., Zhou J., Matthews J., Sing M.C.P., Edwards D.J. | System information modelling in practice: Analysis of tender documentation quality in a                           | Automation in construction                         | 2017 | 10.1016/j.autcon.2017.08.034       |    |    | X  |
| Love, PED; Ackermann, F; Teo, P; Morrison, J                 | From Individual to Collective Learning: A Conceptual Learning Framework for Enacting Rework Prevention            | Journal of construction engineering and management | 2015 | 10.1061/(ASCE)CO.1943-7862.0001013 |    |    | X  |
| Love, PED; Edwards, DJ; Smith, J                             | Rework Causation: Emergent Theoretical Insights and Implications for Research                                     | Journal of construction engineering and management | 2016 | 10.1061/(ASCE)CO.1943-7862.0001114 |    |    | X  |

| Authors                                                              | Article Title                                                                                     | Source Title                                       | Year | DOI                                | C1 | C2 | C3 |
|----------------------------------------------------------------------|---------------------------------------------------------------------------------------------------|----------------------------------------------------|------|------------------------------------|----|----|----|
| Love, PED; Teo, P                                                    | Statistical Analysis of Injury and Nonconformance Frequencies in Construction: Negative Binomial  | Journal of construction engineering and management | 2017 | 10.1061/(ASCE)CO.1943-7862.0001326 |    |    | X  |
| Love, PED; Teo, P; Davidson, M; Cumming, S; Morrison, J              | Building absorptive capacity in an alliance: Process improvement through lessons learned          | International journal of project management        | 2016 | 10.1016/j.ijproman.2016.05.010     |    |    | X  |
| Love, PED; Veli, S; Davis, P; Teo, P; Morrison, J                    | See the Difference in a Precast Facility: Changing Mindsets with an                               | Journal of construction engineering and management | 2017 | 10.1061/(ASCE)CO.1943-7862.0001224 |    |    | X  |
| Lowstedt, M; Raisanen, C; Leiringer, R                               | Doing strategy in project-based organizations: Actors and patterns of action                      | International journal of project management        | 2018 | 10.1016/j.ijproman.2018.05.002     |    |    | X  |
| Lozano-Torro, A; Garcia-Segura, T; Montalban-Domingo, L; Pellicer, E | COMPETITIVE ADVANTAGES AND BARRIERS IN INTERNATIONAL CONSTRUCTION: AN ORIGIN-HOST MARKET APPROACH | Journal of civil engineering and management        | 2020 | 10.3846/jcem.2020.12180            |    |    | X  |
| Lu H., Wang H., Xie Y., Wang X.                                      | Study on construction material allocation policies: A simulation optimization                     | Automation in construction                         | 2018 | 10.1016/j.autcon.2018.02.012       |    |    | X  |
| Lu P., Guo S., Qian L., He P., Xu X.                                 | The effectiveness of contractual and relational governances in construction                       | International journal of project management        | 2015 | 10.1016/j.ijproman.2014.03.004     |    |    | X  |
| Lu P., Qian L., Chu Z., Xu X.                                        | Role of Opportunism and Trust in Construction Projects: Empirical Evidence                        | Journal of management in engineering               | 2016 | 10.1061/(ASCE)ME.1943-5479.0000401 |    |    | X  |

| Authors                                         | Article Title                                                                                                             | Source Title                                          | Year | DOI                                | C1 | C2 | C3 |
|-------------------------------------------------|---------------------------------------------------------------------------------------------------------------------------|-------------------------------------------------------|------|------------------------------------|----|----|----|
| Lu Q., Won J., Cheng J.C.P.                     | A financial decision making framework for construction projects based on 5D Building Information                          | International journal of project management           | 2016 | 10.1016/j.ijproman.2015.09.004     |    |    | X  |
| Lu S., Shang Y., Li Y.                          | A research on the application of fuzzy iteration clustering in the water conservancy                                      | Journal of cleaner production                         | 2017 | 10.1016/j.jclepro.2017.02.064      |    |    | X  |
| Lu W., Chen X., Ho D.C.W., Wang H.              | Analysis of the construction waste management performance in Hong Kong: The public and private sectors compared using big | Journal of cleaner production                         | 2016 | 10.1016/j.jclepro.2015.06.106      |    |    | X  |
| Lu W., Chen X., Peng Y., Shen L.                | Benchmarking construction waste management performance using big data                                                     | Resources, conservation and recycling                 | 2015 | 10.1016/j.resconrec.2015.10.013    |    | X  |    |
| Lu W., Fung A., Peng Y., Liang C., Rowlinson S. | Demystifying construction project time-effort distribution curves: BIM and Non-BIM comparison                             | Journal of management in engineering                  | 2015 | 10.1061/(ASCE)ME.1943-5479.0000356 |    |    | X  |
| Lu W., Guo W., Zhu Q.                           | Effect of Justice on Contractor's Relational Behavior: Moderating Role of Owner's Asset Specificity                       | Journal of construction engineering and management    | 2020 | 10.1061/(ASCE)CO.1943-7862.0001795 |    |    | X  |
| Lu W., Li Z., Wang S.                           | The role of justice for cooperation and contract's moderating effect in construction dispute                              | Engineering construction and architectural management | 2017 | 10.1108/ECAM-01-2015-0002          |    |    | X  |
| Lu W., Tam V.W.Y., Chen H., Du L.               | A holistic review of research on carbon emissions of green building construction                                          | Engineering construction and architectural management | 2020 | 10.1108/ECAM-06-2019-0283          |    |    | X  |



| Authors                                         | Article Title                                                                                                            | Source Title                                          | Year | DOI                                | C1 | C2 | C3 |
|-------------------------------------------------|--------------------------------------------------------------------------------------------------------------------------|-------------------------------------------------------|------|------------------------------------|----|----|----|
| Lu W., Wang J.                                  | The influence of conflict management styles on relationship quality: The moderating effect of the level of task conflict | International journal of project management           | 2017 | 10.1016/j.ijproman.2017.08.012     |    |    | X  |
| Lu W., Xu J., Söderlund J.                      | Exploring the Effects of Building Information Modeling on Projects: Longitudinal Social Network                          | Journal of construction engineering and management    | 2020 | 10.1061/(ASCE)CO.1943-7862.0001823 | X  |    | X  |
| Lu W., Zhang L., Pan J.                         | Identification and analyses of hidden transaction costs in project dispute resolutions                                   | International journal of project management           | 2015 | 10.1016/j.ijproman.2014.08.009     |    |    | X  |
| Lu X., Davis S.                                 | Priming effects on safety decisions in a virtual construction simulator                                                  | Engineering construction and architectural management | 2018 | 10.1108/ECAM-05-2016-0114          |    |    | X  |
| Lu Y., Luo L., Wang H., Le Y., Shi Q.           | Measurement model of project complexity for large-scale projects from task and organization perspective                  | International journal of project management           | 2015 | 10.1016/j.ijproman.2014.12.005     |    |    | X  |
| Lu Y., Wu Z., Chang R., Li Y.                   | Building Information Modeling (BIM) for green buildings: A critical review and future directions                         | Automation in construction                            | 2017 | 10.1016/j.autcon.2017.08.024       |    | X  |    |
| Lu, M; Liu, J; Ji, WY                           | Formalizing a path-float-based approach to determine and interpret total float in project scheduling analysis            | International journal of construction management      | 2017 | 10.1080/15623599.2016.1207366      |    |    | X  |
| Lu, WS; Webster, C; Peng, Y; Chen, X; Zhang, XL | Estimating and calibrating the amount of building-related construction and demolition waste in urban                     | International journal of construction management      | 2017 | 10.1080/15623599.2016.1166548      |    |    | X  |

| Authors                                                            | Article Title                                                                                                                        | Source Title                                          | Year | DOI                                | C1 | C2 | C3 |
|--------------------------------------------------------------------|--------------------------------------------------------------------------------------------------------------------------------------|-------------------------------------------------------|------|------------------------------------|----|----|----|
| Lu, WX; Hua, YY; Zhang, SJ                                         | Logistic regression analysis for factors influencing cost performance of design-bid-build and design-build                           | Engineering construction and architectural management | 2017 | 10.1108/ECAM-07-2015-0119          |    |    | X  |
| Lu, WX; Zhang, LH; Bai, F                                          | Bilateral learning model in construction claim                                                                                       | Engineering construction and architectural management | 2016 | 10.1108/ECAM-04-2014-0062          |    |    | X  |
| Luangcharoenrat, C; Intrachoto, S; Peansupap, V; Sutthinarakorn, W | Factors Influencing Construction Waste Generation in Building Construction: Thailand's                                               | Sustainability                                        | 2019 | 10.3390/su11133638                 |    |    | X  |
| Lucko G., Araújo L.G., Cates G.R.                                  | Slip Chart-Inspired Project Schedule Diagramming: Origins, Buffers, and Extension to Linear                                          | Journal of construction engineering and management    | 2016 | 10.1061/(ASCE)CO.1943-7862.0001089 |    |    | X  |
| Lucko, G; Kaminsky, JA                                             | Construction Engineering Conference and Workshop 2014: Setting an Industry-Academic Collaborative Research Agenda                    | Journal of construction engineering and management    | 2016 | 10.1061/(ASCE)CO.1943-7862.0001088 |    |    | X  |
| Luo H., Liu J., Li C., Chen K., Zhang M.                           | Ultra-rapid delivery of specialty field hospitals to combat COVID-19: Lessons learned from the Leishenshan Hospital project in Wuhan | Automation in construction                            | 2020 | 10.1016/j.autcon.2020.103345       | X  |    |    |
| Luo H., Xiong C., Fang W., Love P.E.D., Zhang B., Ouyang X.        | Convolutional neural networks: Computer vision-based workforce activity assessment in construction                                   | Automation in construction                            | 2018 | 10.1016/j.autcon.2018.06.007       |    |    | X  |
| Luo L., He Q., Jaselskis E.J., Xie J.                              | Construction project complexity: Research trends and implications                                                                    | Journal of construction engineering and management    | 2017 | 10.1061/(ASCE)CO.1943-7862.0001306 |    |    | X  |

| Authors                                                             | Article Title                                                                                                                                      | Source Title                                          | Year | DOI                                | C1 | C2 | C3 |
|---------------------------------------------------------------------|----------------------------------------------------------------------------------------------------------------------------------------------------|-------------------------------------------------------|------|------------------------------------|----|----|----|
| Luo L., He Q., Xie J., Yang D., Wu G.                               | Investigating the Relationship between Project Complexity and Success in Complex Construction Projects                                             | Journal of management in engineering                  | 2017 | 10.1061/(ASCE)ME.1943-5479.0000471 |    |    | X  |
| Luo L., Jin X., Shen G.Q., Prof., Wang Y., Liang X., Li X., Li C.Z. | Supply Chain Management for Prefabricated Building Projects in Hong Kong                                                                           | Journal of management in engineering                  | 2020 | 10.1061/(ASCE)ME.1943-5479.0000739 | X  |    | X  |
| Luo L., Zhang L., Wu G.                                             | Bayesian belief network-based project complexity measurement considering                                                                           | Journal of civil engineering and management           | 2020 | 10.3846/jcem.2020.11930            |    |    | X  |
| Luo S., Liu Z., Yang X., Lu Q., Yin J.                              | Construction Technology of Warm and Hot Mix Epoxy Asphalt Paving for Long-Span Steel Bridge                                                        | Journal of construction engineering and management    | 2019 | 10.1061/(ASCE)CO.1943-7862.0001716 |    |    | X  |
| Luo X., Li H., Dai F., Cao D., Yang X., Guo H.                      | Hierarchical Bayesian Model of Worker Response to Proximity Warnings of Construction Safety Hazards: Toward Constant Review of Safety Risk Control | Journal of construction engineering and management    | 2017 | 10.1061/(ASCE)CO.1943-7862.0001277 |    |    | X  |
| Luo, L; Zhang, LM; He, QH                                           | Linking project complexity to project success: a hybrid SEM-FCM method                                                                             | Engineering construction and architectural management |      | 10.1108/ECAM-05-2019-0241          |    |    | X  |
| Luo, LZ; Shen, GQ; Xu, GY; Liu, YL; Wang, YJ                        | Stakeholder-Associated Supply Chain Risks and Their Interactions in a Prefabricated Building                                                       | Journal of management in engineering                  | 2019 | 10.1061/(ASCE)ME.1943-5479.0000675 |    |    | X  |
| Luo, X; Li, H; Huang, T; Skitmore, M                                | Quantifying Hazard Exposure Using Real-Time Location Data of Construction Workforce and Equipment                                                  | Journal of construction engineering and management    | 2016 | 10.1061/(ASCE)CO.1943-7862.0001139 |    |    | X  |

| Authors                                             | Article Title                                                                                                                                                                | Source Title                                          | Year | DOI                                | C1 | C2 | C3 |
|-----------------------------------------------------|------------------------------------------------------------------------------------------------------------------------------------------------------------------------------|-------------------------------------------------------|------|------------------------------------|----|----|----|
| Ma G., Gu L., Li N.                                 | Scenario-Based Proactive Robust Optimization for Critical-Chain Project                                                                                                      | Journal of construction engineering and management    | 2015 | 10.1061/(ASCE)CO.1943-7862.0001003 |    |    | X  |
| Ma H., Liu Z., Zeng S., Lin H., Tam V.W.Y.          | Does megaproject social responsibility improve the sustainability of the construction industry?                                                                              | Engineering construction and architectural management | 2019 | 10.1108/ECAM-07-2019-0363          |    | X  | X  |
| Ma L., Fu H.                                        | Exploring the influence of project complexity on the mega construction project success: a qualitative comparative analysis (QCA)                                             | Engineering construction and architectural management | 2020 | 10.1108/ECAM-12-2019-0679          |    |    | X  |
| Ma X., Chan A.P.C., Li Y., Zhang B., Xiong F.       | Critical Strategies for Enhancing BIM Implementation in AEC Projects: Perspectives from Conceptual Framework and Roadmap Approach for Integrating BIM into Lifecycle Project | Journal of construction engineering and management    | 2020 | 10.1061/(ASCE)CO.1943-7862.0001748 | X  |    | X  |
| Ma X., Xiong F., Olawumi T.O., Dong N., Chan A.P.C. | Conceptual Framework and Roadmap Approach for Integrating BIM into Lifecycle Project                                                                                         | Journal of management in engineering                  | 2018 | 10.1061/(ASCE)ME.1943-5479.0000647 | X  |    | X  |
| Ma Z., Cai S., Mao N., Yang Q., Feng J., Wang P.    | Construction quality management based on a collaborative system using BIM and indoor positioning                                                                             | Automation in construction                            | 2018 | 10.1016/j.autcon.2018.03.027       |    |    | X  |
| Ma Z., Zhang D., Li J.                              | A dedicated collaboration platform for Integrated Project Delivery                                                                                                           | Automation in construction                            | 2018 | 10.1016/j.autcon.2017.10.024       |    |    | X  |
| Ma, GF; Jia, JY; Ding, JY; Shang, SS; Jiang, S      | Interpretive Structural Model Based Factor Analysis of BIM Adoption in Chinese Construction Organizations                                                                    | Sustainability                                        | 2019 | 10.3390/su11071982                 |    |    | X  |

| Authors                                                        | Article Title                                                                                                                | Source Title                                       | Year | DOI                                | C1 | C2 | C3 |
|----------------------------------------------------------------|------------------------------------------------------------------------------------------------------------------------------|----------------------------------------------------|------|------------------------------------|----|----|----|
| Ma, GF; Jiang, S; Zhu, TC; Jia, JY                             | A Novel Method of Developing Construction Projects Schedule under                                                            | Sustainability                                     | 2019 | 10.3390/su11205710                 |    |    | X  |
| Ma, TY; Wang, ZF; Ding, JY                                     | Governing the Moral Hazard in China's Sponge City Projects: A Managerial Analysis of the Construction in the Non-Public Land | Sustainability                                     | 2018 | 10.3390/su10093018                 |    |    | X  |
| Machado R.L., Vilela C.                                        | Conceptual framework for integrating bim and augmented reality in construction management                                    | Journal of civil engineering and management        | 2020 | 10.3846/jcem.2020.11803            |    |    | X  |
| Madushika W.H.S., Perera B.A.K.S., Ekanayake B.J., Shen G.Q.P. | Key performance indicators of value management in the Sri Lankan construction                                                | International journal of construction management   | 2020 | 10.1080/15623599.2018.1484556      |    |    | X  |
| Maemura Y., Kim E., Ozawa K.                                   | Root Causes of Recurring Contractual Conflicts in International Construction Projects: Five Case Studies from Vietnam        | Journal of construction engineering and management | 2018 | 10.1061/(ASCE)CO.1943-7862.0001523 |    |    | X  |
| Maghsoodi, AI; Khalilzadeh, M                                  | Identification and Evaluation of Construction Projects' Critical Success Factors Employing Fuzzy-TOPSIS                      | KSCE journal of civil engineering                  | 2018 | 10.1007/s12205-017-1970-2          |    | X  |    |
| Magnusson, S; Johansson, M; Frosth, S; Lundberg, K             | Coordinating soil and rock material in urban construction - Scenario analysis of material flows and greenhouse gas emissions | Journal of cleaner production                      | 2019 | 10.1016/j.jclepro.2019.118236      |    |    | X  |
| Mahalingam A., Yadav A.K., Varaprasad J.                       | Investigating the role of lean practices in enabling BIM adoption: Evidence from two Indian cases                            | Journal of construction engineering and management | 2015 | 10.1061/(ASCE)CO.1943-7862.0000982 |    |    | X  |

| Authors                                                                                                                                                                               | Article Title                                                                                                                   | Source Title                                          | Year | DOI                                | C1 | C2 | C3 |
|---------------------------------------------------------------------------------------------------------------------------------------------------------------------------------------|---------------------------------------------------------------------------------------------------------------------------------|-------------------------------------------------------|------|------------------------------------|----|----|----|
| Mahdavi A., Naderpajouh N., Choi J., Ketabi A.B., Hastak M., Cui Q.                                                                                                                   | Dynamics of project selection and growth in project-based organizations                                                         | International journal of construction management      | 2019 | 10.1080/15623599.2019.1604307      |    |    | X  |
| Mahfouz T., Kandil A., Davlyatov S.                                                                                                                                                   | Identification of latent legal knowledge in differing site condition (DSC) litigations                                          | Automation in construction                            | 2018 | 10.1016/j.autcon.2018.06.011       |    |    | X  |
| Mahjoubpour, B; Nasirzadeh, F; Golabchi, MMHZ; Khajehghiasi, MR; Mir, M                                                                                                               | Modeling of workers' learning behavior in construction projects using agent-based approach: The case study of a steel structure | Engineering construction and architectural management | 2018 | 10.1108/ECAM-07-2016-0166          |    |    | X  |
| Mahpour A., Mortaheb M.M.                                                                                                                                                             | Financial-Based Incentive Plan to Reduce Construction                                                                           | Journal of construction engineering and management    | 2018 | 10.1061/(ASCE)CO.1943-7862.0001461 |    |    | X  |
| Maiti S., Choi J.-H.                                                                                                                                                                  | An evidence-based approach to health and safety management in megaprojects                                                      | International journal of construction management      | 2019 | 10.1080/15623599.2019.1602580      |    |    | X  |
| Majrouhi Sardroud J.                                                                                                                                                                  | Perceptions of automated data collection technology use in the construction                                                     | Journal of civil engineering and management           | 2015 | 10.3846/13923730.2013.802734       |    |    | X  |
| Mak T.M.W., Chen P.-C., Wang L., Tsang D.C.W., Hsu S.C., Poon C.S.                                                                                                                    | A system dynamics approach to determine construction waste disposal charge in                                                   | Journal of cleaner production                         | 2019 | 10.1016/j.jclepro.2019.118309      |    |    | X  |
| Maki, T; Kerosuo, H                                                                                                                                                                   | Site managers' daily work and the uses of building information modelling in construction site management                        | Construction management and economics                 | 2015 | 10.1080/01446193.2015.1028953      |    |    | X  |
| Malik S., Fatima F., Imran A., Chuah L.F., Klemeš J.J., Khaliq I.H., Asif S., Aslam M., Jamil F., Durrani A.K., Akbar M.M., Shahbaz M., Usman M., Atabani A.E., Naqvi S.R., Yusup S., | Improved project control for sustainable development of construction sector to reduce environment risks                         | Journal of cleaner production                         | 2019 | 10.1016/j.jclepro.2019.118214      |    |    | X  |

| Authors                                                                             | Article Title                                                                                                                                                               | Source Title                                          | Year | DOI                                | C1 | C2 | C3 |
|-------------------------------------------------------------------------------------|-----------------------------------------------------------------------------------------------------------------------------------------------------------------------------|-------------------------------------------------------|------|------------------------------------|----|----|----|
| Mani N., Kisi K.P., Rojas E.M., Foster E.T.                                         | Estimating Construction Labor Productivity Frontier: Collaborative Learning to Improve the Governance and Performance of Infrastructure Projects in the Construction Sector | Journal of construction engineering and management    | 2017 | 10.1061/(ASCE)CO.1943-7862.0001390 |    |    | X  |
| Manley K., Chen L.                                                                  |                                                                                                                                                                             | Journal of management in engineering                  | 2017 | 10.1061/(ASCE)ME.1943-5479.0000545 |    |    | X  |
| Manley, K; Chen, L                                                                  | The impact of client characteristics on the time and cost performance of collaborative infrastructure projects                                                              | Engineering construction and architectural management | 2016 | 10.1108/ECAM-06-2015-0084          |    |    | X  |
| Mansour H., Aminudin E., Omar B., Al-Sarayreh A.                                    | Development of an impact-on-performance index (IPI) for construction projects in Malaysia: a Delphi study                                                                   | International journal of construction management      | 2020 | 10.1080/15623599.2020.1762036      |    |    | X  |
| Mansouri S., Castronovo F., Akhavian R.                                             | Analysis of the Synergistic Effect of Data Analytics and Technology Trends in the AEC/FM Industry                                                                           | Journal of construction engineering and management    | 2020 | 10.1061/(ASCE)CO.1943-7862.0001759 |    | X  | X  |
| Mansuri D., Chakraborty D., Elzarka H., Deshpande A., Gronseth T.                   | Building Information Modeling enabled Cascading Formwork Management Tool                                                                                                    | Automation in construction                            | 2017 | 10.1016/j.autcon.2017.08.016       |    |    | X  |
| Manu E., Ankrah N., Chinyio E., Proverbs D.                                         | Trust influencing factors in main contractor and subcontractor relationships                                                                                                | International journal of project management           | 2015 | 10.1016/j.ijproman.2015.06.006     |    |    | X  |
| Manu P., Poghosyan A., Mahamadu A.-M., Mahdjoubi L., Gibb A., Behm M., Akinade O.O. | Design for occupational safety and health: key attributes for organisational capability                                                                                     | Engineering construction and architectural management | 2019 | 10.1108/ECAM-09-2018-0389          | X  |    | X  |

| Authors                                                        | Article Title                                                                                                        | Source Title                                          | Year | DOI                                | C1 | C2 | C3 |
|----------------------------------------------------------------|----------------------------------------------------------------------------------------------------------------------|-------------------------------------------------------|------|------------------------------------|----|----|----|
| Mao, S; Shen, X; Lu, M                                         | Virtual Laser Target Board for Alignment Control and Machine Guidance in Tunnel-Boring Operations                    | Journal of intelligent and robotic systems            | 2015 | 10.1007/s10846-014-0113-y          |    | X  |    |
| Mao, XH; Gan, JH; Zhao, XL                                     | Debt Risk Evaluation of Toll Freeways in Mainland China Using the Grey Approach                                      | Sustainability                                        | 2019 | 10.3390/su11051430                 |    |    | X  |
| Maqbool, R; Rashid, Y; Sultanas, S; Ye, SD                     | IDENTIFYING THE CRITICAL SUCCESS FACTORS AND THEIR RELEVANT ASPECTS FOR RENEWABLE ENERGY PROJECTS; AN EMPIRICAL      | Journal of civil engineering and management           | 2018 | 10.3846/jcem.2018.1691             |    |    | X  |
| Maqbool, R; Ye, SD                                             | Critical success factors for renewable energy projects; empirical evidence from Pakistan                             | Journal of cleaner production                         | 2018 | 10.1016/j.jclepro.2018.05.274      |    |    | X  |
| Maqsoom A., Choudhry R.M., Umer M., Mehmood T.                 | Influencing factors indicating time delay in construction projects: impact of firm size and experience               | International journal of construction management      | 2019 | 10.1080/15623599.2019.1613206      |    | X  | X  |
| Maqsoom A., Hamad M., Ashraf H., Thaheem M.J., Umer M.         | Managerial control mechanisms and their influence on project performance: an investigation of the moderating role of | Engineering construction and architectural management | 2020 | 10.1108/ECAM-05-2019-0244          |    |    | X  |
| Maqsoom A., Wazir S.J., Choudhry R.M., Thaheem M.J., Zahoor H. | Influence of Perceived Fairness on Contractors' Potential to Dispute: Moderating Effect of                           | Journal of construction engineering and management    | 2020 | 10.1061/(ASCE)CO.1943-7862.0001740 |    |    | X  |



| Authors                                                                              | Article Title                                                                                                                                 | Source Title                                             | Year | DOI                             | C1 | C2 | C3 |
|--------------------------------------------------------------------------------------|-----------------------------------------------------------------------------------------------------------------------------------------------|----------------------------------------------------------|------|---------------------------------|----|----|----|
| Marefat A., Toosi H.,<br>Mahmoudi Hasankhanlo R.                                     | A BIM approach for<br>construction safety:<br>applications, barriers and                                                                      | Engineering construction and<br>architectural management | 2019 | 10.1108/ECAM-01-2017-0011       |    |    | X  |
| Marella, G; Antoniucci, V                                                            | Time Overrun in Public<br>Works-Evidence from North-                                                                                          | Sustainability                                           | 2019 | 10.3390/su11247057              |    |    | X  |
| Marinelli, M; Petroutsatou,<br>K; Fragkakis, N;<br>Lambropoulos, S                   | Rethinking new public<br>infrastructure value for<br>money in recession times: the<br>Greek case                                              | International journal of<br>construction management      | 2018 | 10.1080/15623599.2017.1358131   |    |    | X  |
| Markiz N., Jrade A.                                                                  | Integrating an expert system<br>with BrIMS, cost estimation,<br>and linear scheduling at<br>conceptual design stage of<br>bridge projects     | International journal of<br>construction management      | 2019 | 10.1080/15623599.2019.1661572   |    |    | X  |
| Markiz N., Jrade A.                                                                  | An expert system to optimize<br>cost and schedule of heavy<br>earthmoving operations for<br>earth- and rock- filled dam<br>projects           | Journal of civil engineering<br>and management           | 2017 | 10.3846/13923730.2015.1027258   |    |    | X  |
| Marks S.J., Kumpel E., Guo<br>J., Bartram J., Davis J.                               | Pathways to sustainability: A<br>fuzzy-set qualitative<br>comparative analysis of rural<br>water supply programs                              | Journal of cleaner production                            | 2018 | 10.1016/j.jclepro.2018.09.029   |    |    | X  |
| Marnewick C.                                                                         | Information system project's<br>sustainability capability                                                                                     | International journal of<br>project management           | 2017 | 10.1016/j.ijproman.2017.02.014  |    |    | X  |
| Marrero M., Puerto M.,<br>Rivero-Camacho C., Freire-<br>Guerrero A., Solís-Guzmán J. | Assessing the economic<br>impact and ecological<br>footprint of construction and<br>demolition waste during the<br>urbanization of rural land | Resources, conservation and<br>recycling                 | 2017 | 10.1016/j.resconrec.2016.10.020 |    | X  |    |

| Authors                                                | Article Title                                                                                                                     | Source Title                                   | Year | DOI                                | C1 | C2 | C3 |
|--------------------------------------------------------|-----------------------------------------------------------------------------------------------------------------------------------|------------------------------------------------|------|------------------------------------|----|----|----|
| Martek, I; Chen, C                                     | Enterprise Localization Practices and Their Implication for Knowledge Management in Foreign Participation in the Chinese          | Journal of management in engineering           | 2015 | 10.1061/(ASCE)ME.1943-5479.0000340 |    |    | X  |
| Martens A., Vanhoucke M.                               | An empirical validation of the performance of project control tolerance limits                                                    | Automation in construction                     | 2018 | 10.1016/j.autcon.2018.01.002       |    |    | X  |
| Martinez J.G., Gheisari M., Alarcón L.F.               | UAV Integration in Current Construction Safety Planning and Monitoring Processes: Case Study of a High-Rise Building Construction | Journal of management in engineering           | 2020 | 10.1061/(ASCE)ME.1943-5479.0000761 |    |    | X  |
| Martinez-Rojas, M; Marin, N; Vila, MA                  | The Role of Information Technologies to Address Data Handling in Construction Project                                             | Journal of computing in civil engineering      | 2016 | 10.1061/(ASCE)CP.1943-5487.0000538 | X  |    |    |
| Marzoughi F., Arthanari T., Askarany D.                | A decision support framework for estimating project duration under the                                                            | Automation in construction                     | 2018 | 10.1016/j.autcon.2017.11.001       |    |    | X  |
| Marzouk M., Elmesteckawi L.                            | Analyzing procurement route selection for electric power plants projects using SMART                                              | Journal of civil engineering and management    | 2015 | 10.3846/13923730.2014.971131       |    |    | X  |
| Marzouk M., Enaba M.                                   | Text analytics to analyze and monitor construction project contract and correspondence                                            | Automation in construction                     | 2019 | 10.1016/j.autcon.2018.11.018       | X  |    |    |
| Marzouk M., Enaba M.                                   | Analyzing project data in BIM with descriptive analytics to improve project                                                       | Built environment project and asset management | 2019 | 10.1108/BEPAM-04-2018-0069         | X  |    |    |
| Matar M., Osman H., Georgy M., Abou-Zeid A., Elsaid M. | Evaluating the environmental performance of pipeline construction using systems modelling                                         | Construction management and economics          | 2019 | 10.1080/01446193.2019.1605185      |    |    | X  |

| Authors                                                                    | Article Title                                                                                                                            | Source Title                                | Year | DOI                                | C1 | C2 | C3 |
|----------------------------------------------------------------------------|------------------------------------------------------------------------------------------------------------------------------------------|---------------------------------------------|------|------------------------------------|----|----|----|
| Matinaro, V; Liu, Y                                                        | Towards increased innovativeness and sustainability through organizational culture: A case study of a Finnish                            | Journal of cleaner production               | 2017 | 10.1016/j.jclepro.2016.10.151      |    |    | X  |
| Matinheikki J., Aaltonen K., Walker D.                                     | Politics, public servants, and profits: Institutional complexity and temporary hybridization in a public infrastructure alliance project | International journal of project management | 2019 | 10.1016/j.ijproman.2018.07.004     |    |    | X  |
| Matthews J., Love P.E.D., Heinemann S., Chandler R., Rumsey C., Olatunj O. | Real time progress management: Re-engineering processes for cloud-based BIM in construction                                              | Automation in construction                  | 2015 | 10.1016/j.autcon.2015.07.004       |    |    | X  |
| Maués L.M.F., Nascimento B.D.M.O.D., Lu W., Xue F.                         | Estimating construction waste generation in residential buildings: A fuzzy set theory approach in the Brazilian Amazon                   | Journal of cleaner production               | 2020 | 10.1016/j.jclepro.2020.121779      |    |    | X  |
| Mavi, RK; Standing, C                                                      | Critical success factors of sustainable project management in construction: A fuzzy DEMATEL-ANP                                          | Journal of cleaner production               | 2018 | 10.1016/j.jclepro.2018.05.120      |    |    | X  |
| Mayo G., Issa R.R.A.                                                       | Nongeometric Building Information Needs Assessment for Facilities                                                                        | Journal of management in engineering        | 2016 | 10.1061/(ASCE)ME.1943-5479.0000414 |    |    | X  |
| Mazur, AK; Pisarski, A                                                     | Major project managers' internal and external stakeholder relationships: The development and validation of measurement                   | International journal of project management | 2015 | 10.1016/j.ijproman.2015.07.008     |    |    | X  |

| Authors                                                               | Article Title                                                                                                               | Source Title                                          | Year | DOI                                | C1 | C2 | C3 |
|-----------------------------------------------------------------------|-----------------------------------------------------------------------------------------------------------------------------|-------------------------------------------------------|------|------------------------------------|----|----|----|
| McKenna A., Baume G.                                                  | Complex project conceptualization and the linguistic turn; the case of a small Australian construction company              | International journal of project management           | 2015 | 10.1016/j.ijproman.2015.06.005     |    |    | X  |
| Mechtcherine V., Nerella V.N., Will F., Näther M., Otto J., Krause M. | Large-scale digital concrete construction – CONPrint3D concept for on-site, monolithic 3D-printing                          | Automation in construction                            | 2019 | 10.1016/j.autcon.2019.102933       |    | X  | X  |
| Mehrbod, S; Staub-French, S; Mahyar, N; Tory, M                       | Characterizing interactions with BIM tools and artifacts in building design coordination meetings                           | Automation in construction                            | 2019 | 10.1016/j.autcon.2018.10.025       | X  |    |    |
| Mei T., Wang Q., Xiao Y., Yang M.                                     | Rent-seeking behavior of BIM-and IPD-based construction project in China                                                    | Engineering construction and architectural management | 2017 | 10.1108/ECAM-11-2015-0178          |    |    | X  |
| Mejlænder-Larsen Ø.                                                   | A three-step process for reporting progress in detail engineering using BIM, based on experiences from oil and gas projects | Engineering construction and architectural management | 2019 | 10.1108/ECAM-12-2017-0273          |    |    | X  |
| Mellado, F; Lou, ECW; Becerra, CLC                                    | Synthesising performance in the construction industry An analysis of performance indicators to promote project improvement  | Engineering construction and architectural management | 2020 | 10.1108/ECAM-09-2018-0419          |    |    | X  |
| Membah, J; Asa, E                                                     | Estimating cost for transportation tunnel projects: a systematic                                                            | International journal of construction management      | 2015 | 10.1080/15623599.2015.1067345      |    |    | X  |
| Memon S.A., Hadikusumo B.H.W., Sunindijo R.Y.                         | Using social interaction theory to promote successful relational contracting between clients and                            | Journal of management in engineering                  | 2015 | 10.1061/(ASCE)ME.1943-5479.0000344 |    |    | X  |

| Authors                                                            | Article Title                                                                                                                                             | Source Title                                          | Year | DOI                                | C1 | C2 | C3 |
|--------------------------------------------------------------------|-----------------------------------------------------------------------------------------------------------------------------------------------------------|-------------------------------------------------------|------|------------------------------------|----|----|----|
| Mendis D., Hewage K.N., Wrzesniewski J.                            | Contractual obligations analysis for construction waste management in Canada                                                                              | Journal of civil engineering and management           | 2015 | 10.3846/13923730.2014.893907       |    |    | X  |
| Menesi W., Hegazy T.                                               | Multimode resource-constrained scheduling and leveling for practical-size                                                                                 | Journal of management in engineering                  | 2015 | 10.1061/(ASCE)ME.1943-5479.0000338 |    |    | X  |
| Meng B., Liu J.-L., Bao K., Sun B.                                 | Water fluxes of Nenjiang River Basin with ecological network analysis: Conflict and coordination between agricultural development and wetland restoration | Journal of cleaner production                         | 2019 | 10.1016/j.jclepro.2018.12.243      |    |    | X  |
| Meng J., Xue B., Liu B., Fang N.                                   | Relationships between top managers' leadership and infrastructure sustainability a Chinese urbanization perspective                                       | Engineering construction and architectural management | 2015 | 10.1108/ECAM-01-2014-0013          |    |    | X  |
| Meng X., Boyd P.                                                   | The role of the project manager in relationship                                                                                                           | International journal of project management           | 2017 | 10.1016/j.ijproman.2017.03.001     |    |    | X  |
| Meng, JN; Yan, JH; Xue, B                                          | Exploring Relationships between National Culture and Infrastructure Sustainability Using QCA                                                              | Journal of construction engineering and management    | 2018 | 10.1061/(ASCE)CO.1943-7862.0001463 |    |    | X  |
| Mengistu D.G., Mahesh G.                                           | Dimensions for improvement of construction management practice in Ethiopian construction industry                                                         | Journal of engineering design and technology          | 2020 | 10.1108/JEDT-10-2018-0175          |    | X  |    |
| Merschbrock C., Hosseini M.R., Martek I., Arashpour M., Mignone G. | Collaborative Role of Sociotechnical Components in BIM-Based Construction Networks in Two Hospitals                                                       | Journal of management in engineering                  | 2018 | 10.1061/(ASCE)ME.1943-5479.0000605 | X  |    | X  |

| Authors                                                                       | Article Title                                                                                       | Source Title                                       | Year | DOI                                | C1 | C2 | C3 |
|-------------------------------------------------------------------------------|-----------------------------------------------------------------------------------------------------|----------------------------------------------------|------|------------------------------------|----|----|----|
| Mesa H.A., Molenaar K.R., Alarcón L.F.                                        | Exploring performance of the integrated project delivery process on complex building projects       | International journal of project management        | 2016 | 10.1016/j.ijproman.2016.05.007     |    |    | X  |
| Mesa H.A., Molenaar K.R., Alarcón L.F.                                        | Comparative analysis between integrated project delivery and lean project                           | International journal of project management        | 2019 | 10.1016/j.ijproman.2019.01.012     |    |    | X  |
| Migilinskas, D; Balionis, E; Dziugaite-Tumeniene, R; Siupsinskas, G           | AN ADVANCED MULTI-CRITERIA EVALUATION MODEL OF THE RATIONAL BUILDING ENERGY PERFORMANCE             | Journal of civil engineering and management        | 2016 | 10.3846/13923730.2016.1194316      |    |    | X  |
| Migilinskas, D; Pavlovskis, M; Urba, I; Zigmund, V                            | ANALYSIS OF PROBLEMS, CONSEQUENCES AND SOLUTIONS FOR BIM APPLICATION IN RECONSTRUCTION              | Journal of civil engineering and management        | 2017 | 10.3846/13923730.2017.1374304      |    |    | X  |
| Milberg C.T., Tommelein I.D.                                                  | Methods for Managing Tolerance Compatibility: Windows in Cast-in-Place Concrete                     | Journal of construction engineering and management | 2020 | 10.1061/(ASCE)CO.1943-7862.0001728 |    |    | X  |
| Mills G.R.W., Razmdoost K.                                                    | Managing value co-creation/destruction: a longitudinal education capital programme/project case     | Construction management and economics              | 2016 | 10.1080/01446193.2016.1187284      |    |    | X  |
| Min J.H., Jang W., Han S.H., Kim D., Young Hoon K.                            | How Conflict Occurs and What Causes Conflict: Conflict Analysis Framework for Public Infrastructure | Journal of management in engineering               | 2018 | 10.1061/(ASCE)ME.1943-5479.0000625 |    |    | X  |
| MinayHashemi S., Han S., Olearczyk J., Bouferguene A., Al-Hussein M., Kosa J. | Automated rigging design for heavy industrial lifts                                                 | Automation in construction                         | 2020 | 10.1016/j.autcon.2020.103083       |    | X  |    |

| Authors                                                               | Article Title                                                                                                                                                 | Source Title                                       | Year | DOI                                | C1 | C2 | C3 |
|-----------------------------------------------------------------------|---------------------------------------------------------------------------------------------------------------------------------------------------------------|----------------------------------------------------|------|------------------------------------|----|----|----|
| Mirahadi, F; Zayed, T                                                 | Simulation-based construction productivity forecast using Neural-Network-Driven Fuzzy                                                                         | Automation in construction                         | 2016 | 10.1016/j.autcon.2015.12.021       |    |    | X  |
| Mirzaei, A; Nasirzadeh, F; Jalal, MP; Zamani, Y                       | 4D-BIM Dynamic Time-Space Conflict Detection and Quantification System for Building Construction                                                              | Journal of construction engineering and management | 2018 | 10.1061/(ASCE)CO.1943-7862.0001504 |    |    | X  |
| Mishmish, M; El-Sayegh, SM                                            | Causes of claims in road construction projects in the UAE                                                                                                     | International journal of construction management   | 2018 | 10.1080/15623599.2016.1230959      |    |    | X  |
| Mo Y., Zhao D., Du J., Syal M., Aziz A., Li H.                        | Automated staff assignment for building maintenance using natural language                                                                                    | Automation in construction                         | 2020 | 10.1016/j.autcon.2020.103150       |    | X  | X  |
| Mock B., O'Connor J.T.                                                | Owner and contractor solution strategies for industrial commissioning                                                                                         | Construction innovation                            | 2019 | 10.1108/CI-09-2018-0079            |    | X  |    |
| Mock B., O'Connor J.T.                                                | High-value, low-effort industrial plant commissioning solution                                                                                                | Construction innovation                            | 2019 | 10.1108/CI-09-2018-0072            |    | X  |    |
| Mogendorff K.                                                         | The building or enactment of expertise in context: what the performative turn in the social sciences may add to expertise research in construction management | Construction management and economics              | 2016 | 10.1080/01446193.2016.1164329      |    |    | X  |
| Mohamad Ramly Z., Shen G.Q., Yu A.T.W.                                | Critical success factors for value management workshops in Malaysia                                                                                           | Journal of management in engineering               | 2015 | 10.1061/(ASCE)ME.1943-5479.0000288 |    |    | X  |
| Mohamed O., Abd-Karim S.B., Roslan N.H., Mohd Danuri M.S., Zakaria N. | Risk management: Looming the modus operandi among construction contractors in Malaysia                                                                        | International journal of construction management   | 2015 | 10.1080/15623599.2014.967928       |    |    | X  |

| Authors                                                                             | Article Title                                                                                                                                              | Source Title                                          | Year | DOI                                | C1 | C2 | C3 |
|-------------------------------------------------------------------------------------|------------------------------------------------------------------------------------------------------------------------------------------------------------|-------------------------------------------------------|------|------------------------------------|----|----|----|
| Mohandes, SR; Sadeghi, H; Mahdiyar, A; Durdyev, S; Banaitis, A; Yahya, K; Ismail, S | ASSESSING CONSTRUCTION LABOURS' SAFETY LEVEL: A FUZZY MCDM APPROACH                                                                                        | Journal of civil engineering and management           | 2020 | 10.3846/jcem.2020.11926            |    |    | X  |
| Mok K.Y., Shen G.Q., Yang J.                                                        | Stakeholder management studies in mega construction projects: A review and future directions                                                               | International journal of project management           | 2015 | 10.1016/j.ijproman.2014.08.007     |    |    | X  |
| Mok K.Y., Shen G.Q., Yang R.J.                                                      | A network theory-based analysis of stakeholder issues and their interrelationships in large construction projects: a case study                            | International journal of construction management      | 2017 | 10.1080/15623599.2016.1187246      |    |    | X  |
| Mok K.Y., Shen G.Q., Yang R.J., Li C.Z.                                             | Investigating key challenges in major public engineering projects by a network-theory based analysis of stakeholder concerns: A case study                 | International journal of project management           | 2017 | 10.1016/j.ijproman.2016.10.017     |    |    | X  |
| Mok, KY; Shen, GQ; Yang, RJ                                                         | Addressing stakeholder complexity and major pitfalls in large cultural building                                                                            | International journal of project management           | 2017 | 10.1016/j.ijproman.2016.12.009     |    |    | X  |
| Molwus J.J., Erdogan B., Ogunlana S.                                                | Using structural equation modelling (SEM) to understand the relationships among critical success factors (CSFs) for stakeholder management in construction | Engineering construction and architectural management | 2017 | 10.1108/ECAM-10-2015-0161          |    |    | X  |
| Montalbán-Domingo L., García-Segura T., Amalia Sanz M., Pellicer E.                 | Social Sustainability in Delivery and Procurement of Public Construction                                                                                   | Journal of management in engineering                  | 2019 | 10.1061/(ASCE)ME.1943-5479.0000674 |    |    | X  |



| Authors                                                  | Article Title                                                                                                                                    | Source Title                                             | Year | DOI                                | C1 | C2 | C3 |
|----------------------------------------------------------|--------------------------------------------------------------------------------------------------------------------------------------------------|----------------------------------------------------------|------|------------------------------------|----|----|----|
| Monzer N., Fayek A.R.,<br>Lourenzutti R., Siraj N.B.     | Aggregation-Based<br>Framework for Construction<br>Risk Assessment with<br>Heterogeneous Groups of<br>Experts                                    | Journal of construction<br>engineering and management    | 2019 | 10.1061/(ASCE)CO.1943-7862.0001614 |    |    | X  |
| Moon D., Chung S., Kwon<br>S., Seo J., Shin J.           | Comparison and utilization of<br>point cloud generated from<br>photogrammetry and laser<br>scanning: 3D world model<br>for smart heavy equipment | Automation in construction                               | 2019 | 10.1016/j.autcon.2018.07.020       |    |    | X  |
| Moon S., Ham N., Kim S.,<br>Hou L., Kim J.-H., Kim J.-J. | Fourth industrialization-<br>oriented offsite construction:<br>case study of an application<br>to an irregular commercial                        | Engineering construction and<br>architectural management | 2020 | 10.1108/ECAM-07-2018-0312          |    | X  |    |
| Moon S., Xu S., Hou L., Wu<br>C., Wang X., Tam V.W.Y.    | RFID-Aided Tracking<br>System to Improve Work<br>Efficiency of Scaffold<br>Supplier: Stock Management<br>in Australasian Supply Chain            | Journal of construction<br>engineering and management    | 2018 | 10.1061/(ASCE)CO.1943-7862.0001432 |    |    | X  |
| Moon S., Zekavat P.R.,<br>Bernold L.E.                   | Dynamic Quality Control of<br>Process Resource to Improve<br>Concrete Supply Chain                                                               | Journal of construction<br>engineering and management    | 2017 | 10.1061/(ASCE)CO.1943-7862.0001270 |    |    | X  |
| Morosi, F; Rossoni, M;<br>Caruso, G                      | Coordinated control<br>paradigm for hydraulic<br>excavator with haptic device                                                                    | Automation in construction                               | 2019 | 10.1016/j.autcon.2019.102848       |    | X  |    |
| Morrison, S; Trushell, I                                 | Payment for offsite goods<br>and materials: the Scottish<br>perspective*                                                                         | Construction management<br>and economics                 | 2016 | 10.1080/01446193.2016.1200738      |    |    | X  |
| Mortaji S.T.H., Noorossana<br>R., Bagherpour M.          | Project completion time and<br>cost prediction using change<br>point analysis                                                                    | Journal of management in<br>engineering                  | 2015 | 10.1061/(ASCE)ME.1943-5479.0000329 |    |    | X  |

| Authors                                                                  | Article Title                                                                                                     | Source Title                                          | Year | DOI                           | C1 | C2 | C3 |
|--------------------------------------------------------------------------|-------------------------------------------------------------------------------------------------------------------|-------------------------------------------------------|------|-------------------------------|----|----|----|
| Mostafa S., Kim K.P., Tam V.W.Y., Rahnamayiezekavat P.                   | Exploring the status, benefits, barriers and opportunities of using BIM for advancing prefabrication practice     | International journal of construction management      | 2020 | 10.1080/15623599.2018.1484555 | X  |    |    |
| Mpofu B., Ochieng E.G., Moobela C., Pretorius A.                         | Profiling causative factors leading to construction project delays in the United Arab Emirates                    | Engineering construction and architectural management | 2017 | 10.1108/ECAM-05-2015-0072     |    |    | X  |
| Mujumdar P., Maheswari J.U.                                              | Alternate beeline diagramming method network analysis for                                                         | Engineering construction and architectural management | 2019 | 10.1108/ECAM-07-2017-0112     |    |    | X  |
| Muller M.F., Esmanioto F., Huber N., Loures E.R., Canciglieri O., Junior | A systematic literature review of interoperability in the green Building Information Modeling                     | Journal of cleaner production                         | 2019 | 10.1016/j.jclepro.2019.03.114 |    |    | X  |
| Muneeswaran, G; Manoharan, P; Awoyera, PO; Adesina, A                    | A statistical approach to assess the schedule delays and risks in Indian                                          | International journal of construction management      | 2020 | 10.1080/15623599.2018.1484991 |    |    | X  |
| Munyasya, BM; Chileshe, N                                                | Towards Sustainable Infrastructure Development: Drivers, Barriers, Strategies, and Coping Mechanisms              | Sustainability                                        | 2018 | 10.3390/su10124341            |    |    | X  |
| Murillo K.P., Rocha E., Rodrigues M.F.                                   | Construction sectors efficiency analysis on seven European countries                                              | Engineering construction and architectural management | 2019 | 10.1108/ECAM-07-2018-0287     |    |    | X  |
| Murphy M.E., Perera S., Heaney G.                                        | Innovation management model: a tool for sustained implementation of product innovation into construction projects | Construction management and economics                 | 2015 | 10.1080/01446193.2015.1031684 |    |    | X  |

| Authors                                                                 | Article Title                                                                                       | Source Title                                          | Year | DOI                                | C1 | C2 | C3 |
|-------------------------------------------------------------------------|-----------------------------------------------------------------------------------------------------|-------------------------------------------------------|------|------------------------------------|----|----|----|
| Murphy, ME; Nahod, MM                                                   | Stakeholder competency in evaluating the environmental impacts of infrastructure projects using BIM | Engineering construction and architectural management | 2017 | 10.1108/ECAM-07-2015-0106          |    |    | X  |
| Murtagh N., Achkar L., Roberts A.                                       | The role of building control surveyors and their power in promoting sustainable construction        | Construction management and economics                 | 2018 | 10.1080/01446193.2017.1397721      |    |    | X  |
| Mustapha, MA; Manan, ZA; Alwi, SRW                                      | Sustainable Green Management System (SGMS) An integrated approach towards organisational            | Journal of cleaner production                         | 2017 | 10.1016/j.jclepro.2016.06.033      |    |    | X  |
| Mzyece, D; Ndekugri, IE; Ankrah, NA                                     | Building information modelling (BIM) and the CDM regulations                                        | Engineering construction and architectural management | 2019 | 10.1108/ECAM-10-2018-0429          |    |    | X  |
| Naar L., Nikolova N., Forsythe P.                                       | Innovative construction and the role of boundary objects: a Gehry case study                        | Construction management and economics                 | 2016 | 10.1080/01446193.2016.1201206      |    |    | X  |
| Nadafi S., Moosavirad S.H., Ariaifar S.                                 | Predicting the project time and costs using EVM based on gray numbers                               | Engineering construction and architectural management | 2019 | 10.1108/ECAM-07-2018-0291          |    |    | X  |
| Naderpajouh N., Hastak M., Gokhale S., Bayraktar M.E., Iyer A., Arif F. | Counterfeiting risk governance in the capital projects supply chain                                 | Journal of construction engineering and management    | 2015 | 10.1061/(ASCE)CO.1943-7862.0000943 |    |    | X  |
| Nam, J; Han, J; Lee, C                                                  | Factors Contributing to Residential Vacancy and Some Approaches to Management in Gyeonggi           | Sustainability                                        | 2016 | 10.3390/su8040367                  |    |    | X  |
| Namian M., Albert A., Zuluaga C.M., Behm M.                             | Role of safety training: Impact on hazard recognition and safety risk perception                    | Journal of construction engineering and management    | 2016 | 10.1061/(ASCE)CO.1943-7862.0001198 |    |    | X  |

| Authors                                                               | Article Title                                                                                                                              | Source Title                                          | Year | DOI                                | C1 | C2 | C3 |
|-----------------------------------------------------------------------|--------------------------------------------------------------------------------------------------------------------------------------------|-------------------------------------------------------|------|------------------------------------|----|----|----|
| Namian M., Albert A.,<br>Zuluaga C.M., Jaselskis E.J.                 | Improving Hazard-<br>Recognition Performance and<br>Safety Training Outcomes:<br>Integrating Strategies for                                | Journal of construction<br>engineering and management | 2016 | 10.1061/(ASCE)CO.1943-7862.0001160 |    |    | X  |
| Nanthagopan, Y; Williams,<br>NL; Page, S                              | Understanding the nature of<br>Project Management capacity<br>in Sri Lankan non-<br>governmental organisations<br>(NGOs): A Resource Based | International journal of<br>project management        | 2016 | 10.1016/j.ijproman.2016.09.003     |    |    | X  |
| Naoum S.G., Alyousif A.-<br>R.T., Atkinson A.R.                       | Impact of national culture on<br>the management practices of<br>construction projects in the<br>United Arab Emirates                       | Journal of management in<br>engineering               | 2015 | 10.1061/(ASCE)ME.1943-5479.0000265 |    |    | X  |
| Narbaev, T; De Marco, A;<br>Orazalin, N                               | A multi-disciplinary meta-<br>review of the public-private<br>partnerships research                                                        | Construction management<br>and economics              | 2020 | 10.1080/01446193.2019.1643033      |    |    | X  |
| Nasanen, J; Vanharanta, O                                             | Program group's discursive<br>construction of context: A<br>means to legitimize buck-<br>passing                                           | International journal of<br>project management        | 2016 | 10.1016/j.ijproman.2016.09.008     |    |    | X  |
| Nascimento, DLD; Sotelino,<br>ED; Lara, TPS; Caiado,<br>RGG; Ivson, P | CONSTRUCTABILITY IN<br>INDUSTRIAL PLANTS<br>CONSTRUCTION: A BIM-<br>LEAN APPROACH USING<br>THE DIGITAL OBEYA<br>ROOM FRAMEWORK             | Journal of civil engineering<br>and management        | 2017 | 10.3846/13923730.2017.1385521      |    |    | X  |
| Nasir M.K., Hadikusumo<br>B.H.W.                                      | System Dynamics Model of<br>Contractual Relationships<br>between Owner and<br>Contractor in Construction                                   | Journal of management in<br>engineering               | 2019 | 10.1061/(ASCE)ME.1943-5479.0000666 |    |    | X  |

| Authors                                                                       | Article Title                                                                                                                                                           | Source Title                                          | Year | DOI                                | C1 | C2 | C3 |
|-------------------------------------------------------------------------------|-------------------------------------------------------------------------------------------------------------------------------------------------------------------------|-------------------------------------------------------|------|------------------------------------|----|----|----|
| Nasirzadeh F., Carmichael D.G., Jarban M.J., Rostamnezhad M.                  | Hybrid fuzzy-system dynamics approach for quantification of the impacts of construction claims                                                                          | Engineering construction and architectural management | 2019 | 10.1108/ECAM-08-2017-0150          |    |    | X  |
| Nasirzadeh F., Kabir H.M.D., Akbari M., Khosravi A., Nahavandi S., Carmichael | ANN-based prediction intervals to forecast labour productivity                                                                                                          | Engineering construction and architectural management | 2020 | 10.1108/ECAM-08-2019-0406          |    |    | X  |
| Nasirzadeh, F; Khanzadi, M; Mir, M                                            | A hybrid simulation framework for modelling construction projects using agent-based modelling and system dynamics: an application to model construction workers' safety | International journal of construction management      | 2018 | 10.1080/15623599.2017.1285485      |    |    | X  |
| Nassar N., AbouRizk S.                                                        | Introduction to Techniques for Resolving Project Performance Contradictions                                                                                             | Journal of construction engineering and management    | 2016 | 10.1061/(ASCE)CO.1943-7862.0001140 |    |    | X  |
| Naticchia B., Carbonari A., Vaccarini M., Giorgi R.                           | Holonic execution system for real-time construction management                                                                                                          | Automation in construction                            | 2019 | 10.1016/j.autcon.2019.04.018       |    | X  | X  |
| Nekouvaght Tak A., Taghaddos H., Mousaei A., Hermann U.R.                     | Evaluating industrial modularization strategies: Local vs. overseas fabrication                                                                                         | Automation in construction                            | 2020 | 10.1016/j.autcon.2020.103175       |    | X  | X  |
| Neuman Y., Alves T.D.C.L., Walsh K.D., Needy K.L.                             | Quantitative Analysis of Supplier Quality Surveillance Practices in EPC Projects                                                                                        | Journal of construction engineering and management    | 2015 | 10.1061/(ASCE)CO.1943-7862.0001023 |    |    | X  |
| Newaz M.T., Davis P., Jefferies M., Pillay M.                                 | Examining the Psychological Contract as Mediator between the Safety Behavior of Supervisors and Workers on Construction Sites                                           | Journal of construction engineering and management    | 2020 | 10.1061/(ASCE)CO.1943-7862.0001722 |    |    | X  |

| Authors                                                          | Article Title                                                                                                                              | Source Title                                             | Year | DOI                                | C1 | C2 | C3 |
|------------------------------------------------------------------|--------------------------------------------------------------------------------------------------------------------------------------------|----------------------------------------------------------|------|------------------------------------|----|----|----|
| Newaz M.T., Davis P.R.,<br>Jefferies M., Pillay M.               | Validation of an agent-<br>specific safety climate model<br>for construction                                                               | Engineering construction and<br>architectural management | 2019 | 10.1108/ECAM-01-2018-0003          |    |    | X  |
| Newton S.                                                        | The being of construction<br>management expertise                                                                                          | Construction management<br>and economics                 | 2016 | 10.1080/01446193.2016.1164328      |    |    | X  |
| Ng F., Harding J.A., Glass J.                                    | An eco-approach to optimise<br>efficiency and productivity of<br>a hydraulic excavator                                                     | Journal of cleaner production                            | 2016 | 10.1016/j.jclepro.2015.06.110      |    |    | X  |
| Nguyen A.T., Nguyen L.D.,<br>Le-Hoai L., Dang C.N.               | Quantifying the complexity<br>of transportation projects<br>using the fuzzy analytic                                                       | International journal of<br>project management           | 2015 | 10.1016/j.ijproman.2015.02.007     |    |    | X  |
| Nguyen H.T., Hadikusumo B.                                       | Impacts of human resource<br>development on engineering,<br>procurement, and<br>construction project success                               | Built environment project<br>and asset management        | 2017 | 10.1108/BEPAM-04-2016-0010         |    |    | X  |
| Nguyen L.D., Le-Hoai L.,<br>Tran D.Q., Dang C.N.,<br>Nguyen C.V. | Effect of project complexity<br>on cost and schedule<br>performance in transportation                                                      | Construction management<br>and economics                 | 2019 | 10.1080/01446193.2018.1532592      |    |    | X  |
| Nguyen L.D., Tran D.Q.,<br>Chandrawinata M.P.                    | Predicting safety risk of<br>working at heights using<br>Bayesian networks                                                                 | Journal of construction<br>engineering and management    | 2016 | 10.1061/(ASCE)CO.1943-7862.0001154 |    |    | X  |
| Nguyen L.H.                                                      | Relationships between<br>Critical Factors Related to<br>Team Behaviors and Client<br>Satisfaction in Construction<br>Project Organizations | Journal of construction<br>engineering and management    | 2019 | 10.1061/(ASCE)CO.1943-7862.0001620 |    |    | X  |
| Nguyen T.H.D., Chileshe N.,<br>Rameezdeen R.                     | External stakeholder strategic<br>actions in construction<br>projects: a Vietnamese study                                                  | Construction management<br>and economics                 | 2018 | 10.1080/01446193.2018.1432866      |    |    | X  |
| Nguyen T.H.D., Chileshe N.,<br>Rameezdeen R., Wood A.            | Stakeholder Influence<br>Pathways in Construction<br>Projects: Multicase Study                                                             | Journal of construction<br>engineering and management    | 2019 | 10.1061/(ASCE)CO.1943-7862.0001680 |    |    | X  |

| Authors                                          | Article Title                                                                                                                       | Source Title                                       | Year | DOI                                | C1 | C2 | C3 |
|--------------------------------------------------|-------------------------------------------------------------------------------------------------------------------------------------|----------------------------------------------------|------|------------------------------------|----|----|----|
| Nguyen T.P., Chileshe N.                         | Revisiting the construction project failure factors in                                                                              | Built environment project and asset management     | 2015 | 10.1108/BEPAM-10-2013-0042         |    |    | X  |
| Nguyen, HD; Nguyen, LD; Chih, YY; Le-Hoai, L     | Influence of Participants' Characteristics on Sustainable Building Practices in Emerging Economies: Empirical Case                  | Journal of construction engineering and management | 2017 | 10.1061/(ASCE)CO.1943-7862.0001321 |    |    | X  |
| Nguyen, LD; Chih, YY; de Soto, BG                | Knowledge Areas Delivered in Project Management Programs: Exploratory Study                                                         | Journal of management in engineering               | 2017 | 10.1061/(ASCE)ME.1943-5479.0000473 |    |    | X  |
| Nguyen, LH; Watanabe, T                          | The Impact of Project Organizational Culture on the Performance of Construction Projects                                            | Sustainability                                     | 2017 | 10.3390/su9050781                  |    |    | X  |
| Nguyen, THD; Chileshe, N; Rameezdeen, R; Wood, A | External stakeholder strategic actions in projects: A multi-case study                                                              | International journal of project management        | 2019 | 10.1016/j.ijproman.2018.12.001     |    |    | X  |
| Ni, GD; Cui, QB; Sang, LH; Wang, WS; Xia, DC     | Knowledge-Sharing Culture, Project-Team Interaction, and Knowledge-Sharing Performance among Project Members                        | Journal of management in engineering               | 2018 | 10.1061/(ASCE)ME.1943-5479.0000590 |    |    | X  |
| Nie, TY; Ye, KH                                  | Demystifying the Barriers to Transport Infrastructure Project Development in Fast Developing Regions: The Case of China             | Sustainability                                     | 2017 | 10.3390/su9101915                  |    |    | X  |
| Nie, YY; Zhao, JB; Zhang, YY; Zhou, JZ           | Risk Evaluation of Not-In-My-Back-Yard Conflict Potential in Facilities Group: A Case Study of Chemical Park in Xuwei New District, | Sustainability                                     | 2020 | 10.3390/su12072723                 |    | X  |    |

| Authors                                                                              | Article Title                                                                                          | Source Title                                          | Year | DOI                            | C1 | C2 | C3 |
|--------------------------------------------------------------------------------------|--------------------------------------------------------------------------------------------------------|-------------------------------------------------------|------|--------------------------------|----|----|----|
| Nik-Bakht M., El-Diraby T.                                                           | Project collective mind: Unlocking project discussion networks                                         | Automation in construction                            | 2017 | 10.1016/j.autcon.2017.08.026   |    |    | X  |
| Nikmehr B., Reza Hosseini M., Rameezdeen R., Chileshe N., Ghoddousi P., Arashpour M. | An integrated model for factors affecting construction and demolition waste management in Iran         | Engineering construction and architectural management | 2017 | 10.1108/ECAM-01-2016-0015      |    |    | X  |
| Niknam M., Karshenas S.                                                              | A shared ontology approach to semantic representation of BIM data                                      | Automation in construction                            | 2017 | 10.1016/j.autcon.2017.03.013   |    |    | X  |
| Ninan J., Mahalingam A., Clegg S., Sankaran S.                                       | ICT for external stakeholder management: sociomateriality from a                                       | Construction management and economics                 | 2020 | 10.1080/01446193.2020.1755047  | X  |    | X  |
| Ning X., Qi J., Wu C., Wang W.                                                       | A tri-objective ant colony optimization based model for planning safe construction site layout         | Automation in construction                            | 2018 | 10.1016/j.autcon.2018.01.007   |    |    | X  |
| Ning X., Qi J., Wu C., Wang W.                                                       | Reducing noise pollution by planning construction site layout via a multi-objective optimization model | Journal of cleaner production                         | 2019 | 10.1016/j.jclepro.2019.03.018  |    | X  |    |
| Ning Y.                                                                              | Identifying combinations of control strategies in dwelling fit-out projects: A latent profile analysis | International journal of project management           | 2017 | 10.1016/j.ijproman.2017.02.003 |    |    | X  |
| Ning Y., Ling F.Y.Y.                                                                 | The effects of project characteristics on adopting relational transaction                              | International journal of project management           | 2015 | 10.1016/j.ijproman.2014.12.006 |    |    | X  |
| Ning, Y; Feng, MJ; Feng, J; Liu, X                                                   | Understanding clients' experience of trust and distrust in dwelling fit-out projects An ambivalence    | Engineering construction and architectural management | 2019 | 10.1108/ECAM-03-2018-0115      |    |    | X  |



| Authors                                                   | Article Title                                                                                                   | Source Title                                       | Year | DOI                                | C1 | C2 | C3 |
|-----------------------------------------------------------|-----------------------------------------------------------------------------------------------------------------|----------------------------------------------------|------|------------------------------------|----|----|----|
| Niu Y., Anumba C., Lu W.                                  | Taxonomy and Deployment Framework for Emerging Pervasive Technologies in Construction Projects                  | Journal of construction engineering and management | 2019 | 10.1061/(ASCE)CO.1943-7862.0001653 | X  |    | X  |
| Niu Y., Lu W., Liu D., Chen K.C., Anumba C.A., Huang G.G. | An SCO-enabled logistics and supply chain-management system in                                                  | Journal of construction engineering and management | 2017 | 10.1061/(ASCE)CO.1943-7862.0001232 |    |    | X  |
| Niu, YL; Deng, XP; Zhao, XB; Zhang, N                     | Hexagonal Diamond Model for International Competitive Advantages of High-Speed Railway Industry                 | Journal of management in engineering               | 2020 | 10.1061/(ASCE)ME.1943-5479.0000746 |    | X  | X  |
| Nnaji C., Gambatese J., Karakhan A., Osei-Kyei R.         | Development and Application of Safety Technology Adoption                                                       | Journal of construction engineering and management | 2020 | 10.1061/(ASCE)CO.1943-7862.0001808 |    |    | X  |
| Noh, HJ; Lee, SK; Yu, JH                                  | Identifying Effective Fugitive Dust Control Measures for Construction Projects in                               | Sustainability                                     | 2018 | 10.3390/su10041206                 |    |    | X  |
| Noktehdan M., Shahbazpour M., Zare M.R., Wilkinson S.     | Innovation Management and Construction Phases in Infrastructure Projects                                        | Journal of construction engineering and management | 2019 | 10.1061/(ASCE)CO.1943-7862.0001608 |    |    | X  |
| Noorizadeh A., Peltokorpi A., Avkiran N.K.                | Supplier Performance Evaluation in Construction Projects: Challenges and Possible Solutions                     | Journal of construction engineering and management | 2019 | 10.1061/(ASCE)CO.1943-7862.0001616 |    |    | X  |
| Noorizadeh, A; Rashidi, K; Peltokorpi, A                  | Categorizing suppliers for development investments in construction: application of DEA and RFM concept          | Construction management and economics              | 2018 | 10.1080/01446193.2017.1416151      |    | X  | X  |
| Notarnicola B., Tassielli G., Renzulli P.A.               | Industrial symbiosis in the Taranto industrial district: Current level, constraints and potential new synergies | Journal of cleaner production                      | 2016 | 10.1016/j.jclepro.2016.02.056      |    | X  |    |

| Authors                                              | Article Title                                                                                                                           | Source Title                                             | Year | DOI                                | C1 | C2 | C3 |
|------------------------------------------------------|-----------------------------------------------------------------------------------------------------------------------------------------|----------------------------------------------------------|------|------------------------------------|----|----|----|
| Nugmanova, A; Arndt, WH;<br>Hossain, MA; Kim, JR     | Effectiveness of Ring Roads<br>in Reducing Traffic<br>Congestion in Cities for Long<br>Run: Big Almaty Ring Road                        | Sustainability                                           | 2019 | 10.3390/su11184973                 |    |    | X  |
| Obiozo R.N., Smallwood J.J.                          | Biophilic construction site<br>model: Enhancing the<br>motivational and humanistic<br>value of the green<br>construction site           | Journal of construction<br>engineering and management    | 2015 | 10.1061/(ASCE)CO.1943-7862.0000941 |    |    | X  |
| O'Connor J.T., Mock B.                               | Responsibilities and<br>accountabilities for industrial<br>facility commissioning and<br>startup activities                             | Construction innovation                                  | 2020 | 10.1108/CI-09-2019-0094            |    | X  |    |
| O'Connor J.T., O'Brien W.J.,<br>Choi J.O.            | Standardization strategy for<br>modular industrial plants                                                                               | Journal of construction<br>engineering and management    | 2015 | 10.1061/(ASCE)CO.1943-7862.0001001 |    | X  |    |
| O'Connor, JT; Mock, BD                               | Construction,<br>Commissioning, and Startup<br>Execution: Problematic<br>Activities on Capital Projects                                 | Journal of construction<br>engineering and management    | 2019 | 10.1061/(ASCE)CO.1943-7862.0001621 |    | X  | X  |
| O'Connor, JT; Woo, J                                 | Proactive Approach to<br>Engineering and Design<br>Deliverables Quality<br>Enhancement                                                  | Journal of management in<br>engineering                  | 2017 | 10.1061/(ASCE)ME.1943-5479.0000508 |    |    | X  |
| Oechler E., Molenaar K.R.,<br>Hallowell M., Scott S. | State-of-practice for risk-<br>based quality assurance in<br>state departments of                                                       | Engineering construction and<br>architectural management | 2018 | 10.1108/ECAM-06-2016-0143          |    |    | X  |
| Ofek, S; Portnov, BA                                 | Differential effect of<br>knowledge on stakeholders'<br>willingness to pay green<br>building price premium:<br>Implications for cleaner | Journal of cleaner production                            | 2020 | 10.1016/j.jclepro.2019.119575      |    |    | X  |

| Authors                                                              | Article Title                                                                                                  | Source Title                                             | Year | DOI                                | C1 | C2 | C3 |
|----------------------------------------------------------------------|----------------------------------------------------------------------------------------------------------------|----------------------------------------------------------|------|------------------------------------|----|----|----|
| Oh E.H., Naderpajouh N.,<br>Hastak M., Gokhale S.                    | Integration of the<br>construction knowledge and<br>expertise in front-end                                     | Journal of construction<br>engineering and management    | 2016 | 10.1061/(ASCE)CO.1943-7862.0001050 |    |    | X  |
| Oh M., Lee J., Hong S.W.,<br>Jeong Y.                                | Integrated system for BIM-<br>based collaborative design                                                       | Automation in construction                               | 2015 | 10.1016/j.autcon.2015.07.015       | X  |    | X  |
| Ohueri C.C., Enegbuma W.I.,<br>Wong N.H., Kuok K.K.,<br>Kenley R.    | Labour productivity<br>motivation framework for<br>Iskandar Malaysia                                           | Built environment project<br>and asset management        | 2018 | 10.1108/BEPAM-09-2017-0070         |    |    | X  |
| Ojiako U., Chipulu M.,<br>Marshall A., Williams T.                   | An examination of the ‘rule<br>of law’ and ‘justice’<br>implications in Online<br>Dispute Resolution in        | International journal of<br>project management           | 2018 | 10.1016/j.ijproman.2017.10.002     |    |    | X  |
| Oke A.E.                                                             | Bonding capability of<br>Nigerian contracting firms                                                            | Engineering construction and<br>architectural management | 2018 | 10.1108/ECAM-01-2016-0007          |    |    | X  |
| Okmen, O                                                             | Comparison of Design<br>Alternatives Based on<br>Lifecycle Costing: Case of an<br>Irrigation Project in Turkey | Journal of management in<br>engineering                  | 2015 | 10.1061/(ASCE)ME.1943-5479.0000351 |    |    | X  |
| Olanipekun A.O., Xia B.,<br>Hon C., Darko A.                         | Effect of Motivation and<br>Owner Commitment on the<br>Delivery Performance of<br>Green Building Projects      | Journal of management in<br>engineering                  | 2018 | 10.1061/(ASCE)ME.1943-5479.0000559 |    |    | X  |
| Olanipekun, AO; Xia, B;<br>Hon, C; Hu, Y                             | Project Owners' Motivation<br>for Delivering Green<br>Building Projects                                        | Journal of construction<br>engineering and management    | 2017 | 10.1061/(ASCE)CO.1943-7862.0001363 |    |    | X  |
| Olaniran, OJ; Love, PED;<br>Edwards, DJ; Olatunji, O;<br>Matthews, J | Chaos Theory: Implications<br>for Cost Overrun Research in<br>Hydrocarbon Megaprojects                         | Journal of construction<br>engineering and management    | 2017 | 10.1061/(ASCE)CO.1943-7862.0001227 |    |    | X  |
| Olatunji O.A.                                                        | Promoting student<br>commitment to BIM in<br>construction education                                            | Engineering construction and<br>architectural management | 2019 | 10.1108/ECAM-04-2018-0173          |    |    | X  |

| Authors                                                                                 | Article Title                                                                                                                    | Source Title                                          | Year | DOI                                | C1 | C2 | C3 |
|-----------------------------------------------------------------------------------------|----------------------------------------------------------------------------------------------------------------------------------|-------------------------------------------------------|------|------------------------------------|----|----|----|
| Olatunji O.A., Aje O.I., Makanjuola S.                                                  | Bid or no-bid decision factors of indigenous contractors in Nigeria                                                              | Engineering construction and architectural management | 2017 | 10.1108/ECAM-01-2016-0029          |    |    | X  |
| Olatunji O.A., Orundami A.O., Ogundare O.                                               | Causal relationship between material price fluctuation and project's outturn costs                                               | Built environment project and asset management        | 2018 | 10.1108/BEPAM-12-2017-0119         |    |    | X  |
| Olatunji S.O., Olawumi T.O., Aje I.O.                                                   | Rethinking Partnering among Quantity-Surveying Firms in Nigeria                                                                  | Journal of construction engineering and management    | 2017 | 10.1061/(ASCE)CO.1943-7862.0001394 |    |    | X  |
| Olawale Y., Sun M.                                                                      | Construction project control in the UK: Current practice, existing problems and recommendations for future improvement           | International journal of project management           | 2015 | 10.1016/j.ijproman.2014.10.003     |    |    | X  |
| Olawumi T.O., Chan D.W.M.                                                               | Building information modelling and project information management framework for construction                                     | Journal of civil engineering and management           | 2018 | 10.3846/jcem.2019.7841             |    |    | X  |
| Olivieri H., Seppänen O., Alves T.D.C.L., Scala N.M., Schiavone V., Liu M., Granja A.D. | Survey Comparing Critical Path Method, Last Planner System, and Location-Based Techniques                                        | Journal of construction engineering and management    | 2019 | 10.1061/(ASCE)CO.1943-7862.0001644 |    |    | X  |
| Olivieri H., Seppänen O., Denis Granja A.                                               | Improving workflow and resource usage in construction schedules through location-based management system (LBMS)                  | Construction management and economics                 | 2018 | 10.1080/01446193.2017.1410561      |    |    | X  |
| Ong H.Y., Wang C., Zainon N.                                                            | Developing a Quality-Embedded EVM Tool to Facilitate the Iron Triangle in Architectural, Construction, and Engineering Practices | Journal of construction engineering and management    | 2018 | 10.1061/(ASCE)CO.1943-7862.0001533 |    |    | X  |

| Authors                                                                  | Article Title                                                                                                                                 | Source Title                                          | Year | DOI                            | C1 | C2 | C3 |
|--------------------------------------------------------------------------|-----------------------------------------------------------------------------------------------------------------------------------------------|-------------------------------------------------------|------|--------------------------------|----|----|----|
| Onubi H.O., Yusof N.A., Hassan A.S.                                      | Understanding the mechanism through which adoption of green construction site practices                                                       | Journal of cleaner production                         | 2020 | 10.1016/j.jclepro.2020.120170  |    |    | X  |
| Oo B.L., Lim B.T.-H.                                                     | Game-based learning in construction management courses: A case of bidding game                                                                | Engineering construction and architectural management | 2016 | 10.1108/ECAM-02-2015-0029      |    |    | X  |
| Opawole, A                                                               | Penalty mechanisms for enforcing concessionaire performance in public-private partnership contracts in                                        | Journal of engineering design and technology          | 2018 | 10.1108/JEDT-04-2017-0030      |    | X  |    |
| Opoku D.-G.J., Agyekum K., Ayarkwa J.                                    | Drivers of environmental sustainability of construction projects: a thematic analysis of verbatim comments from built environment consultants | International journal of construction management      | 2019 | 10.1080/15623599.2019.1678865  |    |    | X  |
| Oppong G.D., Chan A.P.C., Dansoh A.                                      | A review of stakeholder management performance attributes in construction projects                                                            | International journal of project management           | 2017 | 10.1016/j.ijproman.2017.04.015 |    |    | X  |
| Oraee M., Hosseini M.R., Edwards D.J., Li H., Papadonikolaki E., Cao D.  | Collaboration barriers in BIM-based construction networks: A conceptual model                                                                 | International journal of project management           | 2019 | 10.1016/j.ijproman.2019.05.004 |    |    | X  |
| Oraee M., Hosseini M.R., Papadonikolaki E., Palliyaguru R., Arashpour M. | Collaboration in BIM-based construction networks: A bibliometric-qualitative literature review                                                | International journal of project management           | 2017 | 10.1016/j.ijproman.2017.07.001 |    |    | X  |
| Oraskari J., Törmä S.                                                    | RDF-based signature algorithms for computing differences of IFC models                                                                        | Automation in construction                            | 2015 | 10.1016/j.autcon.2015.05.008   |    |    | X  |

| Authors                                                      | Article Title                                                                                                                       | Source Title                                     | Year | DOI                                | C1 | C2 | C3 |
|--------------------------------------------------------------|-------------------------------------------------------------------------------------------------------------------------------------|--------------------------------------------------|------|------------------------------------|----|----|----|
| Orgut R.E., Batouli M., Zhu J., Mostafavi A., Jaselskis E.J. | Critical Factors for Improving Reliability of Project Control Metrics throughout Project Life Cycle                                 | Journal of management in engineering             | 2020 | 10.1061/(ASCE)ME.1943-5479.0000710 |    |    | X  |
| Orsi, A; Guillen-Guillamon, I; Pellicer, E                   | Optimization of Green Building Design Processes: Case Studies within the                                                            | Sustainability                                   | 2020 | 10.3390/su12062276                 |    |    | X  |
| Ortiz J.I., Pellicer E., Molenaar K.R.                       | Management of time and cost contingencies in construction projects: A contractor perspective                                        | Journal of civil engineering and management      | 2018 | 10.3846/jcem.2018.1643             |    |    | X  |
| Osei-Kyei, R; Chan, APC                                      | Implementing public-private partnership (PPP) policy for public construction projects in Ghana: critical success factors and policy | International journal of construction management | 2017 | 10.1080/15623599.2016.1207865      |    |    | X  |
| Osipova E.                                                   | Establishing cooperative relationships and joint risk management in construction projects: Agency theory perspective                | Journal of management in engineering             | 2015 | 10.1061/(ASCE)ME.1943-5479.0000346 |    |    | X  |
| Osunsanmi T.O., Aigbavboa C.O., Emmanuel Oke A., Liphadzi M. | Appraisal of stakeholders' willingness to adopt construction 4.0 technologies for construction projects                             | Built environment project and asset management   | 2020 | 10.1108/BEPAM-12-2018-0159         |    |    | X  |
| Oswald D.                                                    | Safety indicators: questioning the quantitative dominance                                                                           | Construction management and economics            | 2020 | 10.1080/01446193.2019.1605184      |    |    | X  |
| Oswald D., Sherratt F., Smith S.D., Hallowell M.R.           | Exploring safety management challenges for multi-national construction workforces: a UK case study                                  | Construction management and economics            | 2018 | 10.1080/01446193.2017.1390242      |    |    | X  |

| Authors                                                               | Article Title                                                                                                                                        | Source Title                                          | Year | DOI                                | C1 | C2 | C3 |
|-----------------------------------------------------------------------|------------------------------------------------------------------------------------------------------------------------------------------------------|-------------------------------------------------------|------|------------------------------------|----|----|----|
| Oswald D., Wade F., Sherratt F., Smith S.D.                           | Communicating Health and Safety on a Multinational Construction Project: Challenges and Strategies                                                   | Journal of construction engineering and management    | 2019 | 10.1061/(ASCE)CO.1943-7862.0001634 |    |    | X  |
| Oswald D., Zhang R.P., Lingard H., Pirzadeh P., Le Othman, AAE        | The use and abuse of safety indicators in construction                                                                                               | Engineering construction and architectural management | 2018 | 10.1108/ECAM-07-2017-0121          |    |    | X  |
|                                                                       | An international index for customer satisfaction in the construction industry                                                                        | International journal of construction management      | 2015 | 10.1080/15623599.2015.1012140      |    |    | X  |
| Oti A.H., Kurul E., Cheung F., Tah J.H.M.                             | A framework for the utilization of Building Management System data in building information models for building design and                            | Automation in construction                            | 2016 | 10.1016/j.autcon.2016.08.043       |    |    | X  |
| Oti A.H., Tah J.H.M., Abanda F.H.                                     | Integration of Lessons Learned Knowledge in Building Information                                                                                     | Journal of construction engineering and management    | 2018 | 10.1061/(ASCE)CO.1943-7862.0001537 |    |    | X  |
| Owolabi, HA; Oyedele, LO; Alaka, HA; Ajayi, SO; Akinade, OO; Bilal, M | Critical Success Factors for Ensuring Bankable Completion Risk in PFI/PPP                                                                            | Journal of management in engineering                  | 2020 | 10.1061/(ASCE)ME.1943-5479.0000717 |    |    | X  |
| Owusu E.K., Chan A.P.C., Hosseini M.R.                                | Impacts of anti-corruption barriers on the efficacy of anti-corruption measures in infrastructure projects: Implications for sustainable development | Journal of cleaner production                         | 2020 | 10.1016/j.jclepro.2019.119078      |    |    | X  |
| Owusu, EK; Chan, APC                                                  | Barriers Affecting Effective Application of Anticorruption Measures in Infrastructure Projects: Disparities between Developed and Developing         | Journal of management in engineering                  | 2019 | 10.1061/(ASCE)ME.1943-5479.0000667 |    | X  | X  |

| Authors                                                             | Article Title                                                                                                                  | Source Title                                       | Year | DOI                                | C1 | C2 | C3 |
|---------------------------------------------------------------------|--------------------------------------------------------------------------------------------------------------------------------|----------------------------------------------------|------|------------------------------------|----|----|----|
| Owusu, EK; Chan, APC; Ameyaw, E                                     | Toward a cleaner project procurement: Evaluation of construction projects' vulnerability to corruption in developing countries | Journal of cleaner production                      | 2019 | 10.1016/j.jclepro.2019.01.124      |    |    | X  |
| Owusu-Manu D.-G., Ghansah F.A., Darko A., Asiedu R.O., Edwards D.J. | Insurable and non-insurable risks in complex project deals: case of the Ghanaian construction industry                         | Journal of engineering design and technology       | 2020 | 10.1108/JEDT-10-2019-0265          |    | X  |    |
| Oyewole E.O., Dada J.O.                                             | Training gaps in the adoption of building information modelling by Nigerian construction professionals                         | Built environment project and asset management     | 2019 | 10.1108/BEPAM-10-2017-0090         |    |    | X  |
| Ozcan-Deniz, G; Zhu, YM                                             | A system dynamics model for construction method selection with sustainability                                                  | Journal of cleaner production                      | 2016 | 10.1016/j.jclepro.2016.01.089      |    |    | X  |
| Ozkan, O; Gulcicek, U                                               | A neural network for resource constrained project scheduling programming                                                       | Journal of civil engineering and management        | 2015 | 10.3846/13923730.2013.802723       |    |    | X  |
| Ozorhon B., Cinar E.                                                | Critical success factors of enterprise resource planning implementation in construction: Case of Turkey                        | Journal of management in engineering               | 2015 | 10.1061/(ASCE)ME.1943-5479.0000370 |    |    | X  |
| Ozorhon B., Oral K.                                                 | Drivers of Innovation in Construction Projects                                                                                 | Journal of construction engineering and management | 2017 | 10.1061/(ASCE)CO.1943-7862.0001234 |    |    | X  |
| Ozorhon B., Oral K., Demirkesen S.                                  | Investigating the Components of Innovation in Construction Projects                                                            | Journal of management in engineering               | 2016 | 10.1061/(ASCE)ME.1943-5479.0000419 |    |    | X  |
| Ozorhon, B; Karahan, U                                              | Critical Success Factors of Building Information Modeling Implementation                                                       | Journal of management in engineering               | 2017 | 10.1061/(ASCE)ME.1943-5479.0000505 |    |    | X  |



| Authors                                                   | Article Title                                                                                                              | Source Title                                          | Year | DOI                            | C1 | C2 | C3 |
|-----------------------------------------------------------|----------------------------------------------------------------------------------------------------------------------------|-------------------------------------------------------|------|--------------------------------|----|----|----|
| Ozturk G.B.                                               | Interoperability in building information modeling for AECO/FM industry                                                     | Automation in construction                            | 2020 | 10.1016/j.autcon.2020.103122   | X  |    | X  |
| Ozyurt B., Dikmen I., Birgonul M.T.                       | Clustering of host countries to facilitate learning between similar international construction markets                     | Engineering construction and architectural management | 2019 | 10.1108/ECAM-11-2018-0495      |    |    | X  |
| Paik S.M., Leviakangas P., Choi J.                        | Making most of BIM in design: analysis of the importance of design                                                         | International journal of construction management      | 2020 | 10.1080/15623599.2020.1774837  |    |    | X  |
| Pal R., Wang P., Liang X.                                 | The critical factors in managing relationships in international engineering, procurement, and construction (IEPC) projects | International journal of project management           | 2017 | 10.1016/j.ijproman.2017.05.010 |    |    | X  |
| Pala M., Edum-Fotwe F., Ruikar K., Peters C., Doughty N.  | Implementing commercial information exchange: a construction supply chain case study                                       | Construction management and economics                 | 2016 | 10.1080/01446193.2016.1211718  | X  |    |    |
| Palha, RP; De Almeida, AT; Morais, DC; Hipel, KW          | Sorting subcontractors' activities in construction projects with a novel additive-veto sorting approach                    | Journal of civil engineering and management           | 2019 | 10.3846/jcem.2019.9644         |    |    | X  |
| Pall, GK; Bridge, AJ; Washington, S; Gray, J; Skitmore, M | Critical delay factors in power transmission projects: a structural equation modeling approach                             | International journal of construction management      |      | 10.1080/15623599.2019.1686835  |    |    | X  |
| Palm, K; Lindahl, M                                       | A project as a workplace Observations from project managers in four R&D and project-intensive companies                    | International journal of project management           | 2015 | 10.1016/j.ijproman.2014.10.002 |    |    | X  |

| Authors                                                                                                             | Article Title                                                                                                                                               | Source Title                                   | Year | DOI                                | C1 | C2 | C3 |
|---------------------------------------------------------------------------------------------------------------------|-------------------------------------------------------------------------------------------------------------------------------------------------------------|------------------------------------------------|------|------------------------------------|----|----|----|
| Pan, M; Linner, T; Pan, W;<br>Cheng, HM; Bock, T                                                                    | A framework of indicators<br>for assessing construction<br>automation and robotics in<br>the sustainability context                                         | Journal of cleaner production                  | 2018 | 10.1016/j.jclepro.2018.02.053      |    | X  | X  |
| Pandit B., Albert A., Patil Y.                                                                                      | Developing construction<br>hazard recognition skill:<br>leveraging safety climate and<br>social network safety<br>communication patterns                    | Construction management<br>and economics       | 2020 | 10.1080/01446193.2020.1722316      |    |    | X  |
| Panwar A., Jha K.N.                                                                                                 | A many-objective<br>optimization model for<br>construction scheduling                                                                                       | Construction management<br>and economics       | 2019 | 10.1080/01446193.2019.1590615      |    |    | X  |
| Papachristos G., Jain N.,<br>Burman E., Zimmerman N.,<br>Wu X., Liu P., Mumovic D.,<br>Lin B., Davies M., Edkins A. | Low carbon building<br>performance in the<br>construction industry: a multi-<br>method approach of system<br>dynamics and building<br>performance modelling | Construction management<br>and economics       | 2020 | 10.1080/01446193.2020.1748212      |    |    | X  |
| Papadonikolaki E.                                                                                                   | Loosely Coupled Systems of<br>Innovation: Aligning BIM<br>Adoption with<br>Implementation in Dutch                                                          | Journal of management in<br>engineering        | 2018 | 10.1061/(ASCE)ME.1943-5479.0000644 |    |    | X  |
| Papadonikolaki E., van Oel<br>C., Kagioglou M.                                                                      | Organising and Managing<br>boundaries: A structurational<br>view of collaboration with<br>Building Information<br>Modelling (BIM)                           | International journal of<br>project management | 2019 | 10.1016/j.ijproman.2019.01.010     |    |    | X  |
| Papajohn D., El Asmar M.,<br>Molenaar K.R.                                                                          | Contract Administration<br>Tools for Design-Build and<br>Construction<br>Manager/General Contractor                                                         | Journal of management in<br>engineering        | 2019 | 10.1061/(ASCE)ME.1943-5479.0000718 |    |    | X  |

| Authors                                                     | Article Title                                                                                                          | Source Title                                          | Year | DOI                                | C1 | C2 | C3 |
|-------------------------------------------------------------|------------------------------------------------------------------------------------------------------------------------|-------------------------------------------------------|------|------------------------------------|----|----|----|
| Papajohn D., El Asmar M.,<br>Molenaar K.R., Alleman D.      | Comparing Contract<br>Administration Functions for<br>Alternative and Traditional<br>Delivery of Highway Projects      | Journal of management in<br>engineering               | 2020 | 10.1061/(ASCE)ME.1943-5479.0000727 |    |    | X  |
| Park C.-S., Kim H.-J., Park<br>H.-T., Goh J.-H., Pedro A.   | BIM-based idea bank for<br>managing value engineering<br>ideas                                                         | International journal of<br>project management        | 2017 | 10.1016/j.ijproman.2016.09.015     |    |    | X  |
| Park H., Kim K., Kim Y.-W.,<br>Kim H.                       | Stakeholder Management in<br>Long-Term Complex<br>Megaconstruction Projects:<br>The Saemangeum Project                 | Journal of management in<br>engineering               | 2017 | 10.1061/(ASCE)ME.1943-5479.0000515 |    |    | X  |
| Park J., Cai H.                                             | WBS-based dynamic multi-<br>dimensional BIM database<br>for total construction as-built<br>documentation               | Automation in construction                            | 2017 | 10.1016/j.autcon.2017.01.021       |    |    | X  |
| Park J., Cai H., Dunston P.S.,<br>Ghasemkhani H.            | Database-Supported and Web-<br>Based Visualization for Daily<br>4D BIM                                                 | Journal of construction<br>engineering and management | 2017 | 10.1061/(ASCE)CO.1943-7862.0001392 | X  |    |    |
| Park J., Ojiako U., Williams<br>T., Chipulu M., Marshall A. | Practical tool for assessing<br>best value at the procurement<br>stage of public building<br>projects in Korea         | Journal of management in<br>engineering               | 2015 | 10.1061/(ASCE)ME.1943-5479.0000337 |    |    | X  |
| Park M.-W., Elsafty N., Zhu<br>Z.                           | Hardhat-wearing detection<br>for enhancing on-site safety<br>of construction workers                                   | Journal of construction<br>engineering and management | 2015 | 10.1061/(ASCE)CO.1943-7862.0000974 |    | X  | X  |
| Park, CY; Han, SH; Lee,<br>KW; Lee, YM                      | Analyzing Drivers of Conflict<br>in Energy Infrastructure<br>Projects: Empirical Case<br>Study of Natural Gas Pipeline | Sustainability                                        | 2017 | 10.3390/su9112031                  |    |    | X  |

| Authors                                         | Article Title                                                                                                   | Source Title                                       | Year | DOI                                | C1 | C2 | C3 |
|-------------------------------------------------|-----------------------------------------------------------------------------------------------------------------|----------------------------------------------------|------|------------------------------------|----|----|----|
| Park, J; Cha, Y; Al Jassmi, H; Han, S; Hyun, CT | Identification of Defect Generation Rules among Defects in Construction Projects Using Association Rule Mining  | Sustainability                                     | 2020 | 10.3390/su12093875                 |    |    | X  |
| Park, J; Tucker, R                              | Overcoming barriers to the reuse of construction waste material in Australia: a review of the literature        | International journal of construction management   | 2017 | 10.1080/15623599.2016.1192248      |    |    | X  |
| Parn, EA; Edwards, DJ                           | Conceptualising the FinDD API plug-in: A study of BIM-FM integration                                            | Automation in construction                         | 2017 | 10.1016/j.autcon.2017.03.015       |    | X  | X  |
| Passila, P; Pulkka, L; Junnila, S               | How to Succeed in Low-Energy Housing-Path Creation Analysis of Low-Energy Innovation Projects                   | Sustainability                                     | 2015 | 10.3390/su7078801                  |    |    | X  |
| Patel D.A., Jha K.N.                            | Neural network model for the prediction of safe work behavior in construction                                   | Journal of construction engineering and management | 2015 | 10.1061/(ASCE)CO.1943-7862.0000922 |    |    | X  |
| Patel D.A., Jha K.N.                            | Developing a Process to Evaluate Construction Project Safety Hazard Index Using the Possibility                 | Journal of construction engineering and management | 2017 | 10.1061/(ASCE)CO.1943-7862.0001205 |    |    | X  |
| Patel D.A., Jha K.N.                            | Neural network approach for safety climate prediction                                                           | Journal of management in engineering               | 2015 | 10.1061/(ASCE)ME.1943-5479.0000348 |    |    | X  |
| Patel D.A., Jha K.N.                            | Structural Equation Modeling for Relationship-Based Determinants of Safety Performance in Construction Projects | Journal of management in engineering               | 2016 | 10.1061/(ASCE)ME.1943-5479.0000457 |    |    | X  |
| Patel, DA; Kikani, KD; Jha, KN                  | Hazard Assessment Using Consistent Fuzzy Preference Relations Approach                                          | Journal of construction engineering and management | 2016 | 10.1061/(ASCE)CO.1943-7862.0001192 |    |    | X  |

| Authors                                                         | Article Title                                                                                                                                 | Source Title                                          | Year | DOI                                | C1 | C2 | C3 |
|-----------------------------------------------------------------|-----------------------------------------------------------------------------------------------------------------------------------------------|-------------------------------------------------------|------|------------------------------------|----|----|----|
| Paulillo A., Cotton L., Law R., Striolo A., Lettieri P.         | Geothermal energy in the UK: The life-cycle environmental impacts of electricity production from the United Downs Deep                        | Journal of cleaner production                         | 2020 | 10.1016/j.jclepro.2019.119410      |    |    | X  |
| Pawan P., Lorterapong P.                                        | A Fuzzy-Based Integrated Framework for Assessing Time Contingency in Construction Projects                                                    | Journal of construction engineering and management    | 2016 | 10.1061/(ASCE)CO.1943-7862.0001073 |    |    | X  |
| Pellegrino R., Costantino N.                                    | An empirical investigation of the learning effect in concrete operations                                                                      | Engineering construction and architectural management | 2018 | 10.1108/ECAM-02-2017-0036          |    |    | X  |
| Peng S., Dai M., Zhang J., Zhang M., Shi Q., Liang B., Zheng T. | Dynamics of ecological risks associated with heavy metals in sediments during the construction process of the Yangtze River deepwater channel | Journal of cleaner production                         | 2020 | 10.1016/j.jclepro.2020.122231      |    |    | X  |
| Pereira E., Ahn S., Han S., Abourizk S.                         | Finding Causal Paths between Safety Management System Factors and Accident Precursors                                                         | Journal of management in engineering                  | 2020 | 10.1061/(ASCE)ME.1943-5479.0000738 |    |    | X  |
| Pereira E., Han S., Abourizk S., Hermann U.                     | Empirical Testing for Use of Safety Related Measures at the Organizational Level to Assess and Control the On-Site Risk Level                 | Journal of construction engineering and management    | 2017 | 10.1061/(ASCE)CO.1943-7862.0001303 |    |    | X  |
| Pereira, E; Hermann, U; Han, S; AbouRizk, S                     | Case-Based Reasoning Approach for Assessing Safety Performance Using Safety-Related Measures                                                  | Journal of construction engineering and management    | 2018 | 10.1061/(ASCE)CO.1943-7862.0001546 |    | X  |    |

| Authors                                                          | Article Title                                                                                                                                            | Source Title                                     | Year | DOI                                | C1 | C2 | C3 |
|------------------------------------------------------------------|----------------------------------------------------------------------------------------------------------------------------------------------------------|--------------------------------------------------|------|------------------------------------|----|----|----|
| Perera N.A., Sutrisna M., Yiu T.W.                               | Decision-making model for selecting the optimum method of delay analysis in construction projects                                                        | Journal of management in engineering             | 2016 | 10.1061/(ASCE)ME.1943-5479.0000441 |    |    | X  |
| Perera, BAKS; Wijewickrama, MKCS; Goonawardana, PJA; Jayalath, C | Improving the efficacy of delay notification process of construction projects in Sri Lanka                                                               | International journal of construction management |      | 10.1080/15623599.2019.1581593      |    |    | X  |
| Pérez C.T., Costa D.                                             | Developing a taxonomy of transportation waste in construction production processes                                                                       | Built environment project and asset management   | 2018 | 10.1108/BEPAM-04-2018-0062         |    |    | X  |
| Perez D., Gray J., Skitmore M.                                   | Perceptions of risk allocation methods and equitable risk distribution: a study of medium to large Southeast Queensland commercial construction projects | International journal of construction management | 2017 | 10.1080/15623599.2016.1233087      |    |    | X  |
| Perrenoud A., Lines B.C., Savicky J., Sullivan K.T.              | Using Best-Value Procurement to Measure the Impact of Initial Risk-Management Capability on Qualitative Construction                                     | Journal of management in engineering             | 2017 | 10.1061/(ASCE)ME.1943-5479.0000535 |    |    | X  |
| Perrenoud A.J., Smithwick J.B., Hurtado K.C., Sullivan K.T.      | Project Risk Distribution during the Construction Phase of Small Building                                                                                | Journal of management in engineering             | 2016 | 10.1061/(ASCE)ME.1943-5479.0000417 |    |    | X  |
| Pesamaa, O; Larsson, J; Eriksson, PE                             | Role of Performance Feedback on Process Performance in Construction Projects: Client and                                                                 | Journal of management in engineering             | 2018 | 10.1061/(ASCE)ME.1943-5479.0000619 |    |    | X  |

| Authors                                                  | Article Title                                                                                                                            | Source Title                                             | Year | DOI                                | C1 | C2 | C3 |
|----------------------------------------------------------|------------------------------------------------------------------------------------------------------------------------------------------|----------------------------------------------------------|------|------------------------------------|----|----|----|
| Pesek, AE; Smithwick, JB;<br>Saseendran, A; Sullivan, KT | Information Asymmetry on<br>Heavy Civil Projects:<br>Deficiency Identification by<br>Contractors and Owners                              | Journal of management in<br>engineering                  | 2019 | 10.1061/(ASCE)ME.1943-5479.0000694 | X  |    | X  |
| Petri, I; Beach, T; Rana, OF;<br>Rezgui, Y               | Coordinating multi-site<br>construction projects using<br>federated clouds                                                               | Automation in construction                               | 2017 | 10.1016/j.autcon.2017.08.011       |    |    | X  |
| Petroutsatou K.                                          | A proposal of project<br>management practices in<br>public institutions through a<br>comparative analyses of<br>critical path method and | International journal of<br>construction management      | 2019 | 10.1080/15623599.2019.1619225      |    |    | X  |
| Phillips-Alonge, OK                                      | The influence of partnering<br>on the occurrence of<br>construction requirement<br>conflicts and disputes                                | International journal of<br>construction management      | 2019 | 10.1080/15623599.2018.1435236      |    |    | X  |
| Phua F.T.T.                                              | Does the built-environment<br>industry attract risk-taking<br>individuals?                                                               | Construction management<br>and economics                 | 2017 | 10.1080/01446193.2016.1237776      |    |    | X  |
| Pinto, JK; Patanakul, P;<br>Pinto, MB                    | The aura of capability:<br>Gender bias in selection for a<br>project manager job                                                         | International journal of<br>project management           | 2017 | 10.1016/j.ijproman.2017.01.004     |    |    | X  |
| Pirzadeh, P; Lingard, H                                  | Understanding the Dynamics<br>of Construction Decision<br>Making and the Impact on<br>Work Health and Safety                             | Journal of management in<br>engineering                  | 2017 | 10.1061/(ASCE)ME.1943-5479.0000532 | X  |    | X  |
| Pishdad-Bozorgi, P; de la<br>Garza, JM; Austin, RB       | Readiness Assessment for<br>Flash Tracking                                                                                               | Journal of construction<br>engineering and management    | 2016 | 10.1061/(ASCE)CO.1943-7862.0001190 |    |    | X  |
| Plantinga, H; Voordijk, H;<br>Doree, A                   | The reasoning behind<br>infrastructure manager's<br>choice of procurement                                                                | Engineering construction and<br>architectural management | 2019 | 10.1108/ECAM-02-2018-0068          |    |    | X  |

| Authors                                                                | Article Title                                                                                         | Source Title                                | Year | DOI                           | C1 | C2 | C3 |
|------------------------------------------------------------------------|-------------------------------------------------------------------------------------------------------|---------------------------------------------|------|-------------------------------|----|----|----|
| Plaza D.M., Martinez I.C., Gasch G.M., Sufrategui F.T., García J.R.    | A case study of the feasibility of using solar concentrating technologies for manufacturing ceramics  | Journal of cleaner production               | 2015 | 10.1016/j.jclepro.2014.09.090 |    | X  |    |
| Podolski M.                                                            | Management of resources in multiunit construction projects with the use of a tabu search algorithm    | Journal of civil engineering and management | 2017 | 10.3846/13923730.2015.1073616 |    |    | X  |
| Poh C.Q.X., Ubeynarayana C.U., Goh Y.M.                                | Safety leading indicators for construction sites: A machine learning approach                         | Automation in construction                  | 2018 | 10.1016/j.autcon.2018.03.022  |    |    | X  |
| Poirier E., Forgues D., Staub-French S.                                | Collaboration through innovation: implications for expertise in the AEC sector                        | Construction management and economics       | 2016 | 10.1080/01446193.2016.1206660 |    |    | X  |
| Polat G.                                                               | Subcontractor selection using the integration of the AHP and PROMETHEE methods                        | Journal of civil engineering and management | 2016 | 10.3846/13923730.2014.948910  |    |    | X  |
| Polat G., Eray E., Bingol B.N.                                         | An integrated fuzzy MCGDM approach for supplier selection problem                                     | Journal of civil engineering and management | 2017 | 10.3846/13923730.2017.1343201 |    |    | X  |
| Ponton H., Osborne A., Thompson N., Greenwood D.                       | The power of humour to unite and divide: a case study of design coordination meetings in construction | Construction management and economics       | 2020 | 10.1080/01446193.2019.1656339 |    |    | X  |
| Ponz-Tienda J.L., Salcedo-Bernal A., Pellicer E., Benlloch-Marco J.    | Improved Adaptive Harmony Search algorithm for the Resource Leveling Problem with minimal lags        | Automation in construction                  | 2017 | 10.1016/j.autcon.2017.01.018  |    |    | X  |
| Poshdar, M; Gonzalez, VA; Raftery, GM; Orozco, F; Cabrera-Guerrero, GG | A multi-objective probabilistic-based method to determine optimum allocation of time buffer in        | Automation in construction                  | 2018 | 10.1016/j.autcon.2018.03.025  |    |    | X  |



| Authors                                                                   | Article Title                                                                                                                                                                     | Source Title                                             | Year | DOI                                | C1 | C2 | C3 |
|---------------------------------------------------------------------------|-----------------------------------------------------------------------------------------------------------------------------------------------------------------------------------|----------------------------------------------------------|------|------------------------------------|----|----|----|
| Pour Rahimian F.,<br>Seyedzadeh S., Oliver S.,<br>Rodriguez S., Dawood N. | On-demand monitoring of<br>construction projects through<br>a game-like hybrid<br>application of BIM and                                                                          | Automation in construction                               | 2020 | 10.1016/j.autcon.2019.103012       |    |    | X  |
| Pournader M., Tabassi A.A.,<br>Baloh P.                                   | A three-step design science<br>approach to develop a novel<br>human resource-planning<br>framework in projects: The<br>cases of construction projects<br>in USA, Europe, and Iran | International journal of<br>project management           | 2015 | 10.1016/j.ijproman.2014.06.009     |    |    | X  |
| Povetkin K., Isaac S.                                                     | Identifying and addressing<br>latent causes of construction<br>waste in infrastructure                                                                                            | Journal of cleaner production                            | 2020 | 10.1016/j.jclepro.2020.122024      |    |    | X  |
| Prakash, A; Phadtare, M                                                   | Service quality for architects:<br>scale development and<br>validation                                                                                                            | Engineering construction and<br>architectural management | 2018 | 10.1108/ECAM-03-2017-0046          | X  |    | X  |
| Prascevic N., Prascevic Z.                                                | Application of fuzzy AHP for<br>ranking and selection of<br>alternatives in construction<br>project management                                                                    | Journal of civil engineering<br>and management           | 2017 | 10.3846/13923730.2017.1388278      |    |    | X  |
| Praticò F.G., Casciano A.                                                 | Variability of HMA<br>characteristics and its<br>influence on pay adjustment                                                                                                      | Journal of civil engineering<br>and management           | 2015 | 10.3846/13923730.2013.802713       |    |    | X  |
| Preece C.N., Mat Isa C.M.,<br>Saman H.M., Che Ibrahim<br>C.K.             | Development of entry<br>location, entry timing and<br>entry mode decision model<br>for construction firms in                                                                      | Construction management<br>and economics                 | 2016 | 10.1080/01446193.2015.1084429      |    | X  |    |
| Priven V., Sacks R.                                                       | Effects of the last planner<br>system on social networks<br>among construction trade                                                                                              | Journal of construction<br>engineering and management    | 2015 | 10.1061/(ASCE)CO.1943-7862.0000975 |    |    | X  |

| Authors                                          | Article Title                                                                                                                                       | Source Title                                          | Year | DOI                                | C1 | C2 | C3 |
|--------------------------------------------------|-----------------------------------------------------------------------------------------------------------------------------------------------------|-------------------------------------------------------|------|------------------------------------|----|----|----|
| Priven, V; Sacks, R                              | Impacts of the Social Subcontract and Last Planner System Interventions on the Trade-Crew Workflows of Multistory Residential Construction Projects | Journal of construction engineering and management    | 2016 | 10.1061/(ASCE)CO.1943-7862.0001102 |    |    | X  |
| Pryke S., Lunic D., Badi S.                      | The effect of leader emotional intelligence on leader–follower chemistry: a study of construction project                                           | Construction management and economics                 | 2015 | 10.1080/01446193.2015.1078901      |    |    | X  |
| Puente M.C.R., Arozamena E.R., Evans S.          | Industrial symbiosis opportunities for small and medium sized enterprises: Preliminary study in the Besaya region (Cantabria, Northern Spain)       | Journal of cleaner production                         | 2015 | 10.1016/j.jclepro.2014.10.046      |    | X  | X  |
| Puri N., Turkan Y.                               | Bridge construction progress monitoring using lidar and 4D design models                                                                            | Automation in construction                            | 2020 | 10.1016/j.autcon.2019.102961       | X  |    | X  |
| Pärn E.A., Edwards D.J., Sing M.C.P.             | Origins and probabilities of MEP and structural design clashes within a federated BIM model                                                         | Automation in construction                            | 2018 | 10.1016/j.autcon.2017.09.010       |    |    | X  |
| Qayoom A., H.W. Hadikusumo B.                    | Multilevel safety culture affecting organization safety performance: a system dynamic approach                                                      | Engineering construction and architectural management | 2019 | 10.1108/ECAM-08-2018-0355          |    |    | X  |
| Qazi A., Quigley J., Dickson A., Kirytopoulos K. | Project Complexity and Risk Management (ProCRiM): Towards modelling project complexity driven risk paths in construction projects                   | International journal of project management           | 2016 | 10.1016/j.ijproman.2016.05.008     |    |    | X  |

| Authors                             | Article Title                                                                                                            | Source Title                                       | Year | DOI                                | C1 | C2 | C3 |
|-------------------------------------|--------------------------------------------------------------------------------------------------------------------------|----------------------------------------------------|------|------------------------------------|----|----|----|
| Qiang M., Wen Q., Jiang H., Yuan S. | Factors governing construction project delivery selection: A content analysis                                            | International journal of project management        | 2015 | 10.1016/j.ijproman.2015.07.001     |    |    | X  |
| Qiao Y., Fricker J.D., Labi S.      | Influence of Project Bundling on Maintenance of Traffic Costs across Highway Project                                     | Journal of construction engineering and management | 2019 | 10.1061/(ASCE)CO.1943-7862.0001676 |    |    | X  |
| Qiao Y., Fricker J.D., Labi S.      | Quantifying the Similarity between Different Project Types Based on Their Pay Item Compositions: Application to Bundling | Journal of construction engineering and management | 2019 | 10.1061/(ASCE)CO.1943-7862.0001689 |    |    | X  |
| Qiao Y., Labi S., Fricker J.D.      | Hazard-Based Duration Models for Predicting Actual Duration of Highway Projects Using Nonparametric and                  | Journal of management in engineering               | 2019 | 10.1061/(ASCE)ME.1943-5479.0000700 |    |    | X  |
| Qin X., Mo Y., Jing L.              | Risk perceptions of the life-cycle of green buildings in                                                                 | Journal of cleaner production                      | 2016 | 10.1016/j.jclepro.2016.03.103      |    |    | X  |
| Qiu W., Liu Y., Lu F., Huang G.     | Establishing a sustainable evaluation indicator system for railway tunnel in China                                       | Journal of cleaner production                      | 2020 | 10.1016/j.jclepro.2020.122150      |    |    | X  |
| Rachid Z., Toufik B., Mohammed B.   | Causes of schedule delays in construction projects in                                                                    | International journal of construction management   | 2019 | 10.1080/15623599.2018.1435234      |    |    | X  |
| Rafferty, M; Toner, P               | Thinking like Capital markets - Financialisation of the Australian Construction                                          | Construction management and economics              | 2019 | 10.1080/01446193.2018.1513163      |    | X  | X  |
| Rafiei, MH; Adeli, H                | Novel Machine-Learning Model for Estimating Construction Costs Considering Economic                                      | Journal of construction engineering and management | 2018 | 10.1061/(ASCE)CO.1943-7862.0001570 |    |    | X  |

| Authors                                                           | Article Title                                                                                                               | Source Title                                          | Year | DOI                                | C1 | C2 | C3 |
|-------------------------------------------------------------------|-----------------------------------------------------------------------------------------------------------------------------|-------------------------------------------------------|------|------------------------------------|----|----|----|
| Rahimi Y., Tavakkoli-Moghaddam R., Iranmanesh S.H., Vaez-Alaei M. | Hybrid Approach to Construction Project Risk Management with Simultaneous FMEA/ISO 31000/Evolutionary Algorithms: Empirical | Journal of construction engineering and management    | 2018 | 10.1061/(ASCE)CO.1943-7862.0001486 |    |    | X  |
| Rahmani F., Leifels K.                                            | Abductive Grounded Theory: a worked example of a study in construction management                                           | Construction management and economics                 | 2018 | 10.1080/01446193.2018.1449954      |    |    | X  |
| Rahmawati Y., Utomo C., Zawawi N.A.W.A.                           | BIM and e-negotiation practices in AEC consulting                                                                           | Sustainability                                        | 2019 | 10.3390/su11071911                 | X  |    | X  |
| Raiden A.                                                         | Horseplay, care and hands on hard work: gendered strategies of a project manager on a construction                          | Construction management and economics                 | 2016 | 10.1080/01446193.2016.1182637      |    |    | X  |
| Rajeh M., Tookey J.E., Olabode J., Rotimi B.                      | Estimating transaction costs in the New Zealand construction procurement a structural equation modelling                    | Engineering construction and architectural management | 2015 | 10.1108/ECAM-10-2014-0130          |    |    | X  |
| Rajeh, MA; Tookey, JE; Rotimi, JOB                                | Developing a procurement path determination chart SEM-based approach                                                        | Construction management and economics                 | 2015 | 10.1080/01446193.2016.1151538      |    | X  | X  |
| Ram J., Afridi N.K., Khan K.A.                                    | Adoption of Big Data analytics in construction: development of a conceptual                                                 | Built environment project and asset management        | 2019 | 10.1108/BEPAM-05-2018-0077         |    |    | X  |
| Ramaji I.J., Memari A.M.                                          | Product Architecture Model for Multistory Modular                                                                           | Journal of construction engineering and management    | 2016 | 10.1061/(ASCE)CO.1943-7862.0001159 |    | X  | X  |
| Ramalingam S., Mahalingam A.                                      | Knowledge coordination in transnational engineering projects:a practice-based                                               | Construction management and economics                 | 2018 | 10.1080/01446193.2018.1498591      |    |    | X  |
| Ramani P.V., KSD L.K.L.                                           | Application of lean in construction using value stream mapping                                                              | Engineering construction and architectural management | 2019 | 10.1108/ECAM-12-2018-0572          |    |    | X  |

| Authors                                                               | Article Title                                                                                                       | Source Title                                     | Year | DOI                           | C1 | C2 | C3 |
|-----------------------------------------------------------------------|---------------------------------------------------------------------------------------------------------------------|--------------------------------------------------|------|-------------------------------|----|----|----|
| Ranasinghe N., Perera B.A.K.S., Dilakshan R.                          | Drivers of decisions behind outsourcing of quantity surveying services in construction projects                     | International journal of construction management | 2019 | 10.1080/15623599.2019.1622199 |    |    | X  |
| Ranawaka I., Mallawaarachchi H.                                       | A risk-responsive framework for green retrofit projects in Sri Lanka                                                | Built environment project and asset management   | 2018 | 10.1108/BEPAM-10-2017-0088    |    |    | X  |
| Rasmussen M.H., Lefrançois M., Pauwels P., Hviid C.A., Karlshøj J.    | Managing interrelated project information in AEC Knowledge Graphs                                                   | Automation in construction                       | 2019 | 10.1016/j.autcon.2019.102956  |    |    | X  |
| Rasul N., Malik M.S.A., Bakhtawar B., Thaheem M.J.                    | Risk assessment of fast-track projects: a systems-based approach                                                    | International journal of construction management | 2019 | 10.1080/15623599.2019.1602587 |    |    | X  |
| Ratajczak J., Riedl M., Matt D.T.                                     | BIM-based and AR application combined with location-based management system for the improvement of the construction | Buildings                                        | 2019 | 10.3390/buildings9050118      | X  |    |    |
| Razavialavi S., Abourizk S.                                           | A hybrid simulation approach for quantitatively analyzing the impact of facility size on construction projects      | Automation in construction                       | 2015 | 10.1016/j.autcon.2015.09.006  |    |    | X  |
| Razmdoost, K; Mills, G                                                | Towards a service-led relationship in project-based firms                                                           | Construction management and economics            | 2016 | 10.1080/01446193.2016.1200106 |    |    | X  |
| Rehman, MSU; Thaheem, MJ; Nasir, AR; Khan, KIA                        | Project schedule risk management through building information modelling                                             | International journal of construction management |      | 10.1080/15623599.2020.1728606 |    |    | X  |
| Reizgevicus, M; Ustinovicius, L; Cibulskiene, D; Kutut, V; Nazarko, L | Promoting Sustainability through Investment in Building Information Modeling (BIM) Technologies: A Design           | Sustainability                                   | 2018 | 10.3390/su10030600            |    |    | X  |

| Authors                                                                | Article Title                                                                                                                                                              | Source Title                                       | Year | DOI                                | C1 | C2 | C3 |
|------------------------------------------------------------------------|----------------------------------------------------------------------------------------------------------------------------------------------------------------------------|----------------------------------------------------|------|------------------------------------|----|----|----|
| Ren K., Huang S., Huang Q., Wang H., Leng G., Cheng L., Fang W., Li P. | A nature-based reservoir optimization model for resolving the conflict in human water demand and riverine ecosystem protection                                             | Journal of cleaner production                      | 2019 | 10.1016/j.jclepro.2019.05.221      |    |    | X  |
| Rezvani A., Ashkanasy N., Khosravi P.                                  | Key Attitudes: Unlocking the Relationships between Emotional Intelligence and Performance in Construction Projects                                                         | Journal of construction engineering and management | 2020 | 10.1061/(ASCE)CO.1943-7862.0001803 |    |    | X  |
| Rezvani A., Khosravi P., Ashkanasy N.M.                                | Examining the interdependencies among emotional intelligence, trust, and performance in infrastructure projects: A                                                         | International journal of project management        | 2018 | 10.1016/j.ijproman.2018.08.002     |    |    | X  |
| Ribas J.R., Arce M.E., Sohler F.A., Suárez-García A.                   | Multi-criteria risk assessment: Case study of a large hydroelectric project                                                                                                | Journal of cleaner production                      | 2019 | 10.1016/j.jclepro.2019.04.043      |    |    | X  |
| Rincón J.L., Fernández-Solís J.L., Lavy S., Du J.                      | Effect of Autonomous Agents on Last Planner System Performance in Texas                                                                                                    | Journal of management in engineering               | 2019 | 10.1061/(ASCE)ME.1943-5479.0000657 |    |    | X  |
| Robert, M                                                              | Engaging private actors in transport planning to achieve future emission targets - upscaling the Climate and Economic Research in Organisations (CERO) process to regional | Journal of cleaner production                      | 2017 | 10.1016/j.jclepro.2015.05.025      |    |    | X  |
| Robinson O.J., Tewkesbury A., Kemp S., Williams I.D.                   | Towards a universal carbon footprint standard: A case study of carbon management at universities                                                                           | Journal of cleaner production                      | 2018 | 10.1016/j.jclepro.2017.02.147      |    |    | X  |

| Authors                                                                               | Article Title                                                                                                   | Source Title                                          | Year | DOI                                | C1 | C2 | C3 |
|---------------------------------------------------------------------------------------|-----------------------------------------------------------------------------------------------------------------|-------------------------------------------------------|------|------------------------------------|----|----|----|
| Rodrigues J., Gérard A., Séré G., Morel J.-L., Guimont S., Simonnot M.-O., Pons M.-N. | Life cycle impacts of soil construction, an innovative approach to reclaim brownfields and produce              | Journal of cleaner production                         | 2019 | 10.1016/j.jclepro.2018.11.152      |    | X  | X  |
| Rodríguez-Garzón I., Martínez-Fiestas M., Delgado Padial A., Lucas-Ruiz V.            | An Exploratory Analysis of Perceived Risk among Construction Workers in Three Spanish-Speaking                  | Journal of construction engineering and management    | 2016 | 10.1061/(ASCE)CO.1943-7862.0001187 |    |    | X  |
| Rodriguez-Gaviria, EM; Ochoa-Osorio, S; Builes-Jaramillo, A; Botero-Fernandez, V      | Computational Bottom-Up Vulnerability Indicator for Low-Income Flood-Prone Urban Areas                          | Sustainability                                        | 2019 | 10.3390/su11164341                 |    |    | X  |
| Rogers J., Chong H.-Y., Preece C.                                                     | Adoption of Building Information Modelling technology (BIM): Perspectives from Malaysian engineering consulting | Engineering construction and architectural management | 2015 | 10.1108/ECAM-05-2014-0067          |    |    | X  |
| Rogulj K., Jajac N.                                                                   | Achieving a Construction Barrier-Free Environment: Decision Support to Policy Selection                         | Journal of management in engineering                  | 2018 | 10.1061/(ASCE)ME.1943-5479.0000618 |    |    | X  |
| Rohani M., Shafabakhsh G., Haddad A., Asnaashari E.                                   | Strategy management of construction workspaces by conflict resolution algorithm and visualization model         | Engineering construction and architectural management | 2018 | 10.1108/ECAM-08-2016-0183          | X  |    | X  |
| Roofigari-Esfahan N., Paez A., N.razavi S.                                            | Location-aware scheduling and control of linear projects: Introducing space-time float prisms                   | Journal of construction engineering and management    | 2015 | 10.1061/(ASCE)CO.1943-7862.0000916 |    |    | X  |
| Rose, CM; Stegemann, JA                                                               | From Waste Management to Component Management in the Construction Industry                                      | Sustainability                                        | 2018 | 10.3390/su10010229                 |    | X  | X  |

| Authors                                       | Article Title                                                                                                            | Source Title                                          | Year | DOI                                | C1 | C2 | C3 |
|-----------------------------------------------|--------------------------------------------------------------------------------------------------------------------------|-------------------------------------------------------|------|------------------------------------|----|----|----|
| Rostami A., Sommerville J., Wong I.L., Lee C. | Risk management implementation in small and medium enterprises in the UK construction industry                           | Engineering construction and architectural management | 2015 | 10.1108/ECAM-04-2014-0057          |    |    | X  |
| Rostami, A; Oduoza, CF                        | Key risks in construction projects in Italy: contractors' perspective                                                    | Engineering construction and architectural management | 2017 | 10.1108/ECAM-09-2015-0142          |    |    | X  |
| Rudeli N., Santilli A., Puente I., Viles E.   | Statistical Model for Schedule Prediction: Validation in a Housing-Cooperative Construction                              | Journal of construction engineering and management    | 2017 | 10.1061/(ASCE)CO.1943-7862.0001396 |    |    | X  |
| Ruparathna R., Hewage K.                      | Review of contemporary construction procurement practices                                                                | Journal of management in engineering                  | 2015 | 10.1061/(ASCE)ME.1943-5479.0000279 |    |    | X  |
| Ruparathna, R; Hewage, K                      | Sustainable procurement in the Canadian construction industry: current practices, drivers and opportunities              | Journal of cleaner production                         | 2015 | 10.1016/j.jclepro.2015.07.007      |    |    | X  |
| Ruppert-Winkel, C                             | Leaders, networks and the social context: A relational leadership approach to regional renewable energy self-sufficiency | Journal of cleaner production                         | 2018 | 10.1016/j.jclepro.2018.05.001      |    |    | X  |
| Ruqaishi M., Bashir H.A.                      | Causes of delay in construction projects in the oil and gas industry in the gulf cooperation council                     | Journal of management in engineering                  | 2015 | 10.1061/(ASCE)ME.1943-5479.0000248 |    | X  | X  |
| Russell M.M., Liu M., Howell G., Hsiang S.M.  | Case studies of the allocation and reduction of time buffer through use of the last planner system                       | Journal of construction engineering and management    | 2015 | 10.1061/(ASCE)CO.1943-7862.0000900 |    |    | X  |



| Authors                            | Article Title                                                                                                                                   | Source Title                                       | Year | DOI                                | C1 | C2 | C3 |
|------------------------------------|-------------------------------------------------------------------------------------------------------------------------------------------------|----------------------------------------------------|------|------------------------------------|----|----|----|
| Russell M.M., Liu M., Hsiang S.M.  | Planning for uncertainty: use of structural equation modelling to determine the causal structure of time                                        | Construction management and economics              | 2015 | 10.1080/01446193.2015.1137335      |    |    | X  |
| Russell-Smith S.V., Lepech M.D.    | Cradle-to-gate sustainable target value design: Integrating life cycle assessment and construction management for buildings                     | Journal of cleaner production                      | 2015 | 10.1016/j.jclepro.2015.03.044      |    |    | X  |
| Rybicka J., Tiwari A., Leeke G.A.  | Technology readiness level assessment of composites recycling technologies                                                                      | Journal of cleaner production                      | 2016 | 10.1016/j.jclepro.2015.08.104      |    |    | X  |
| Ryu J., Seo J., Jebelli H., Lee S. | Automated Action Recognition Using an Accelerometer-Embedded Wristband-Type Activity                                                            | Journal of construction engineering and management | 2019 | 10.1061/(ASCE)CO.1943-7862.0001579 |    | X  | X  |
| Saad A., Zahid S.M., Muhammad U.B. | Role of awareness in strengthening the relationship between stakeholder management and project success in the construction industry of Pakistan | International journal of construction management   | 2020 | 10.1080/15623599.2020.1742854      |    |    | X  |
| Sackey E., Tuuli M., Dainty A.     | Expansive learning in contemporary construction organisations: An exemplar in BIM-mediated projects                                             | Built environment project and asset management     | 2019 | 10.1108/BEPAM-06-2018-0092         |    |    | X  |
| Sackey, E; Tuuli, M; Dainty, A     | Sociotechnical Systems Approach to BIM Implementation in a Multidisciplinary Construction Context                                               | Journal of management in engineering               | 2015 | 10.1061/(ASCE)ME.1943-5479.0000303 |    |    | X  |
| Sacks R.                           | What constitutes good production flow in                                                                                                        | Construction management and economics              | 2016 | 10.1080/01446193.2016.1200733      |    |    | X  |

| Authors                                                                  | Article Title                                                                                                                    | Source Title                                          | Year | DOI                                | C1 | C2 | C3 |
|--------------------------------------------------------------------------|----------------------------------------------------------------------------------------------------------------------------------|-------------------------------------------------------|------|------------------------------------|----|----|----|
| Sacks R., Seppänen O.,<br>Priven V., Savosnick J.                        | Construction flow index: a<br>metric of production flow<br>quality in construction                                               | Construction management<br>and economics              | 2017 | 10.1080/01446193.2016.1274417      |    |    | X  |
| Sadatsafavi, H; Kim, AA;<br>Soucek, MK                                   | Impact of Roles and<br>Affiliations on End-Users'<br>Acceptance of ERP<br>Implementation in a Large                              | Journal of management in<br>engineering               | 2016 | 10.1061/(ASCE)ME.1943-5479.0000458 |    |    | X  |
| Sadeghi N., Fayek A.R.,<br>Seresht N.G.                                  | A fuzzy discrete event<br>simulation framework for<br>construction applications:<br>Improving the simulation<br>time advancement | Journal of construction<br>engineering and management | 2016 | 10.1061/(ASCE)CO.1943-7862.0001195 |    |    | X  |
| Sadeghi N., Robinson Fayek<br>A., Gerami Seresht N.                      | Queue performance measures<br>in construction simulation<br>models containing subjective<br>uncertainty                          | Automation in construction                            | 2015 | 10.1016/j.autcon.2015.07.023       |    |    | X  |
| Saenz C., Brown H.                                                       | The disclosure of<br>anticorruption aspects in<br>companies of the<br>construction sector: Main<br>companies worldwide and in    | Journal of cleaner production                         | 2018 | 10.1016/j.jclepro.2018.06.045      |    |    | X  |
| Sáez P.V., Porras-Amores C.,<br>Del Río Merino M.                        | New quantification proposal<br>for construction waste<br>generation in new residential                                           | Journal of cleaner production                         | 2015 | 10.1016/j.jclepro.2015.04.029      |    |    | X  |
| Saez, PV; Astorqui, JSC;<br>Merino, MD; Moyano,<br>MDM; Sanchez, AR      | Estimation of construction<br>and demolition waste in<br>building energy efficiency<br>retrofitting works of the                 | Journal of cleaner production                         | 2018 | 10.1016/j.jclepro.2017.11.113      |    |    | X  |
| Saez, PV; Merino, MD;<br>Porras-Amores, C; Astorqui,<br>JSC; Pericot, NG | Analysis of Best Practices to<br>Prevent and Manage the<br>Waste Generated in Building<br>Rehabilitation Works                   | Sustainability                                        | 2019 | 10.3390/su11102796                 |    |    | X  |

| Authors                                                                             | Article Title                                                                                        | Source Title                                       | Year | DOI                                | C1 | C2 | C3 |
|-------------------------------------------------------------------------------------|------------------------------------------------------------------------------------------------------|----------------------------------------------------|------|------------------------------------|----|----|----|
| Safa M., Reinsma S., Haas C.T., Goodrum P.M., Caldas C.H.                           | A decision-making method for choosing concrete forming systems                                       | International journal of construction management   | 2018 | 10.1080/15623599.2016.1253243      |    | X  | X  |
| Safa M., Shahi A., Haas C.T., Fiander-McCann D., Safa M., Hipel K., MacGillivray S. | Competitive intelligence (CI) for evaluation of construction contractors                             | Automation in construction                         | 2015 | 10.1016/j.autcon.2015.02.009       |    | X  | X  |
| Safa M., Shahi A., Haas C.T., Hipel K.W.                                            | Construction contract management using value packaging systems                                       | International journal of construction management   | 2017 | 10.1080/15623599.2016.1167369      |    |    | X  |
| Safapour E., Kermanshachi S.                                                        | Identifying Early Indicators of Manageable Rework Causes and Selecting Mitigating Best Practices for | Journal of management in engineering               | 2019 | 10.1061/(ASCE)ME.1943-5479.0000669 |    |    | X  |
| Safapour, E; Kermanshachi, S; Alfasi, B; Akhavian, R                                | Identification of Schedule-Performance Indicators and Delay-Recovery Strategies for Low-Cost Housing | Sustainability                                     | 2019 | 10.3390/su11216005                 |    |    | X  |
| Sage D.                                                                             | Thinking with materialities in construction management: a response to Alexander Styhre               | Construction management and economics              | 2017 | 10.1080/01446193.2017.1348612      |    |    | X  |
| Sage D.J.                                                                           | Rethinking construction expertise with posthumanism                                                  | Construction management and economics              | 2016 | 10.1080/01446193.2015.1122201      |    |    | X  |
| Said H.M., Reginato J.                                                              | Impact of Design Changes on Virtual Design and Construction Performance for Electrical Contractors   | Journal of construction engineering and management | 2018 | 10.1061/(ASCE)CO.1943-7862.0001417 |    |    | X  |
| Said H.M.M., Lucko G.                                                               | Float types in construction spatial scheduling                                                       | Journal of construction engineering and management | 2016 | 10.1061/(ASCE)CO.1943-7862.0001202 |    |    | X  |
| Said, HM; Kandimalla, P                                                             | Performance Measurement of Building Sheet-Metal Ductwork Prefabrication under Batch Production       | Journal of construction engineering and management | 2018 | 10.1061/(ASCE)CO.1943-7862.0001423 |    |    | X  |

| Authors                                                   | Article Title                                                                                                           | Source Title                                          | Year | DOI                                | C1 | C2 | C3 |
|-----------------------------------------------------------|-------------------------------------------------------------------------------------------------------------------------|-------------------------------------------------------|------|------------------------------------|----|----|----|
| Salah A., Moselhi O.                                      | Contingency modelling for construction projects using fuzzy-set theory                                                  | Engineering construction and architectural management | 2015 | 10.1108/ECAM-03-2014-0039          |    |    | X  |
| Salas R., Hallowell M.                                    | Predictive Validity of Safety Leading Indicators: Empirical Assessment in the Oil and Gas Sector                        | Journal of construction engineering and management    | 2016 | 10.1061/(ASCE)CO.1943-7862.0001167 |    |    | X  |
| Salehipour A., Naeni L.M., Khanbabaei R., Javaheri A.     | Lessons Learned from Applying the Individuals Control Charts to Monitoring Autocorrelated Project                       | Journal of construction engineering and management    | 2016 | 10.1061/(ASCE)CO.1943-7862.0001078 |    |    | X  |
| Sambasivan M., Deepak T.J., Salim A.N., Ponniah V.        | Analysis of delays in Tanzanian construction industry Transaction cost economics (TCE) and structural equation modeling | Engineering construction and architectural management | 2017 | 10.1108/ECAM-09-2015-0145          |    |    | X  |
| San Santoso, D; Soeng, S                                  | Analyzing Delays of Road Construction Projects in Cambodia: Causes and                                                  | Journal of management in engineering                  | 2016 | 10.1061/(ASCE)ME.1943-5479.0000467 |    |    | X  |
| Sanchez B., Haas C.                                       | Capital project planning for a circular economy                                                                         | Construction management and economics                 | 2018 | 10.1080/01446193.2018.1435895      |    |    | X  |
| Sang, LH; Xia, DC; Ni, GD; Cui, QB; Wang, JP; Wang, WS    | Influence mechanism of job satisfaction and positive affect on knowledge sharing among project members                  | Engineering construction and architectural management | 2020 | 10.1108/ECAM-10-2018-0463          |    |    | X  |
| Sang, PD; Liu, JJ; Zhang, L; Zheng, LQ; Yao, HN; Wang, YJ | Moderator role of Effects of Project Manager Competency on Green Construction Performance: The Chinese Context          | Sustainability                                        | 2018 | 10.3390/su10103406                 |    |    | X  |
| Sanni-Anibire M.O., Zin R.M., Olatunji S.O.               | Machine learning model for delay risk assessment in tall building projects                                              | International journal of construction management      | 2020 | 10.1080/15623599.2020.1768326      |    |    | X  |

| Authors                                                            | Article Title                                                                                                                                             | Source Title                                          | Year | DOI                            | C1 | C2 | C3 |
|--------------------------------------------------------------------|-----------------------------------------------------------------------------------------------------------------------------------------------------------|-------------------------------------------------------|------|--------------------------------|----|----|----|
| Saoud L.A., Omran J., Hassan B., Vilutienė T., Kiaulakis A.        | A method to predict change propagation within building information model                                                                                  | Journal of civil engineering and management           | 2017 | 10.3846/13923730.2017.1323006  |    |    | X  |
| Sarhan, JG; Xia, B; Fawzia, S; Karim, A; Olanipekun, AO; Coffey, V | Framework for the implementation of lean construction strategies using the interpretive structural modelling (ISM) technique A case of the Saudi          | Engineering construction and architectural management | 2020 | 10.1108/ECAM-03-2018-0136      |    |    | X  |
| Sariola R., Martinsuo M.                                           | Enhancing the supplier's non-contractual project relationships with designers                                                                             | International journal of project management           | 2016 | 10.1016/j.ijproman.2016.04.002 |    |    | X  |
| Sarkar D.                                                          | Hybrid approach for resource optimization and management of bridge projects using bootstrap                                                               | International journal of construction management      | 2018 | 10.1080/15623599.2017.1315526  |    |    | X  |
| Sarkar D., Patel H., Dave B.                                       | Development of integrated cloud-based Internet of Things (IoT) platform for asset management of elevated metro rail projects                              | International journal of construction management      | 2020 | 10.1080/15623599.2020.1762035  |    |    | X  |
| Sarkar D., Singh M.                                                | Risk analysis by integrated fuzzy expected value method and fuzzy failure mode and effect analysis for an elevated metro rail project of Ahmedabad, India | International journal of construction management      | 2020 | 10.1080/15623599.2020.1742634  |    |    | X  |
| Sarkkinen M., Kujala K., Gehör S.                                  | Decision support framework for solid waste management based on sustainability criteria: A case study of tailings pond cover systems                       | Journal of cleaner production                         | 2019 | 10.1016/j.jclepro.2019.07.058  |    | X  | X  |

| Authors                                                    | Article Title                                                                                                                   | Source Title                                          | Year | DOI                                | C1 | C2 | C3 |
|------------------------------------------------------------|---------------------------------------------------------------------------------------------------------------------------------|-------------------------------------------------------|------|------------------------------------|----|----|----|
| Sawan R., Low J.F., Schiffauerova A.                       | Quality cost of material procurement in construction projects                                                                   | Engineering construction and architectural management | 2018 | 10.1108/ECAM-04-2017-0068          |    |    | X  |
| Savelsbergh C.M.J.H., Poell R.F., van der Heijden B.I.J.M. | Does team stability mediate the relationship between leadership and team learning? An empirical study among Dutch project teams | International journal of project management           | 2015 | 10.1016/j.ijproman.2014.08.008     |    |    | X  |
| Savolainen, JM; Saari, A; Mannisto, A; Kahkonen, K         | Indicators of collaborative design management in construction projects                                                          | Journal of engineering design and technology          | 2018 | 10.1108/JEDT-09-2017-0091          | X  |    |    |
| Scholtenhuis L.L.O., Hartmann T., Dorée A.G.               | Testing the Value of 4D Visualizations for Enhancing Mindfulness in Utility Reconstruction Works                                | Journal of construction engineering and management    | 2016 | 10.1061/(ASCE)CO.1943-7862.0001126 |    |    | X  |
| Scholtenhuis, LLO; Hartmann, T; Doree, AG                  | 4D CAD Based Method for Supporting Coordination of Urban Subsurface Utility Projects                                            | Automation in construction                            | 2016 | 10.1016/j.autcon.2015.10.013       |    |    | X  |
| Schropfer, VLM; Tah, J; Kurul, E                           | Mapping the knowledge flow in sustainable construction project teams using social network analysis                              | Engineering construction and architectural management | 2017 | 10.1108/ECAM-08-2015-0124          |    |    | X  |
| Schweber L.                                                | Putting theory to work: the use of theory in construction research                                                              | Construction management and economics                 | 2015 | 10.1080/01446193.2015.1133918      |    |    | X  |
| Seadon J., Tookey J.E.                                     | Drivers for construction productivity                                                                                           | Engineering construction and architectural management | 2019 | 10.1108/ECAM-05-2016-0127          |    |    | X  |

| Authors                                  | Article Title                                                                                                                                                 | Source Title                                          | Year | DOI                                | C1 | C2 | C3 |
|------------------------------------------|---------------------------------------------------------------------------------------------------------------------------------------------------------------|-------------------------------------------------------|------|------------------------------------|----|----|----|
| Sedita S.R., Apa R.                      | The impact of inter-organizational relationships on contractors' success in winning public procurement projects: The case of the construction industry in the | International journal of project management           | 2015 | 10.1016/j.ijproman.2015.05.001     |    |    | X  |
| Seker, S; Zavadskas, EK                  | Application of Fuzzy DEMATEL Method for Analyzing Occupational Risks on Construction Sites                                                                    | Sustainability                                        | 2017 | 10.3390/su9112083                  |    |    | X  |
| Selvam, G; Tadepalli, TCM                | Genetic algorithm based optimization for resource leveling problem with precedence constrained scheduling                                                     | International journal of construction management      |      | 10.1080/15623599.2019.1641891      |    |    | X  |
| Semaan N., Salem M.                      | A deterministic contractor selection decision support system for competitive                                                                                  | Engineering construction and architectural management | 2017 | 10.1108/ECAM-06-2015-0094          |    |    | X  |
| Senaratne S., Samaraweera A.             | Construction project leadership across the team development process                                                                                           | Built environment project and asset management        | 2015 | 10.1108/BEPAM-10-2012-0049         |    |    | X  |
| Seneviratne K., Amaratunga D., Haigh R.  | Managing housing needs of post conflict housing reconstruction: Sri Lankan                                                                                    | Engineering construction and architectural management | 2017 | 10.1108/ECAM-10-2015-0157          |    |    | X  |
| Seo J., Lee S., Seo J.                   | Simulation-Based Assessment of Workers' Muscle Fatigue and Its Impact on Construction                                                                         | Journal of construction engineering and management    | 2016 | 10.1061/(ASCE)CO.1943-7862.0001182 |    |    | X  |
| Sepasgozar, SME; Loosemore, M; Davis, SR | Conceptualising information and equipment technology adoption in construction A critical review of existing                                                   | Engineering construction and architectural management | 2016 | 10.1108/ECAM-05-2015-0083          |    |    | X  |

| Authors                                    | Article Title                                                                                                                                         | Source Title                                       | Year | DOI                                | C1 | C2 | C3 |
|--------------------------------------------|-------------------------------------------------------------------------------------------------------------------------------------------------------|----------------------------------------------------|------|------------------------------------|----|----|----|
| Seresht, NG; Fayek, AR                     | Dynamic Modeling of Multifactor Construction Productivity for Equipment-Intensive Activities                                                          | Journal of construction engineering and management | 2018 | 10.1061/(ASCE)CO.1943-7862.0001549 |    |    | X  |
| Serpell A., Ferrada X., Rubio N.L.         | Fostering the effective usage of risk management in                                                                                                   | Journal of civil engineering and management        | 2017 | 10.3846/13923730.2017.1321578      |    |    | X  |
| Sertyesilisik B.                           | A preliminary study on the regenerative construction project management concept for enhancing sustainability performance of the construction industry | International journal of construction management   | 2017 | 10.1080/15623599.2016.1222665      |    |    | X  |
| Serugga, J; Kagioglou, M; Tzortzopoulos, P | Value Generation in Front-End Design of Social Housing with QFD and Multiattribute Utility Theory                                                     | Journal of construction engineering and management | 2020 | 10.1061/(ASCE)CO.1943-7862.0001787 |    |    | X  |
| Seyis, S                                   | Pros and Cons of Using Building Information Modeling in the AEC                                                                                       | Journal of construction engineering and management | 2019 | 10.1061/(ASCE)CO.1943-7862.0001681 |    |    | X  |
| Seyis, S; Ergen, E; Pizzi, E               | Identification of Waste Types and Their Root Causes in Green-Building Project Delivery Process                                                        | Journal of construction engineering and management | 2016 | 10.1061/(ASCE)CO.1943-7862.0001038 |    |    | X  |
| Sezer A.A.                                 | Contractor use of productivity and sustainability indicators for                                                                                      | Built environment project and asset management     | 2015 | 10.1108/BEPAM-11-2013-0065         |    |    | X  |
| Sezer A.A., Bosch-Sijtsema P.              | Actor-to-actor tensions influencing waste management in building refurbishment projects: a service ecosystem                                          | International journal of construction management   | 2020 | 10.1080/15623599.2020.1741493      |    |    | X  |



| Authors                                                          | Article Title                                                                                                | Source Title                                          | Year | DOI                                | C1 | C2 | C3 |
|------------------------------------------------------------------|--------------------------------------------------------------------------------------------------------------|-------------------------------------------------------|------|------------------------------------|----|----|----|
| Sezer, AA; Brochner, J                                           | Site managers' ICT tools for monitoring resources in refurbishment                                           | Engineering construction and architectural management | 2019 | 10.1108/ECAM-02-2018-0074          | X  |    | X  |
| Sha K.                                                           | Incentive strategies for construction project manager: a common agency                                       | Construction management and economics                 | 2019 | 10.1080/01446193.2018.1554255      |    | X  |    |
| Sha'ar, KZ; Assaf, SA; Bambang, T; Babsail, M; Abd El Fattah, AM | Design-construction interface problems in large building construction projects                               | International journal of construction management      | 2017 | 10.1080/15623599.2016.1187248      |    |    | X  |
| Shafahi A., Haghani A.                                           | Project selection and scheduling for phase-able projects with interdependencies among                        | Automation in construction                            | 2018 | 10.1016/j.autcon.2018.05.008       |    |    | X  |
| Shafiq, MT; Afzal, M                                             | Potential of Virtual Design Construction Technologies to Improve Job-Site Safety in Gulf Corporation Council | Sustainability                                        | 2020 | 10.3390/su12093826                 |    |    | X  |
| Shahi A., Safa M., Haas C.T., West J.S.                          | Data Fusion Process Management for Automated Construction Progress Estimation                                | Journal of computing in civil engineering             | 2015 | 10.1061/(ASCE)CP.1943-5487.0000436 |    | X  |    |
| Shahi K., McCabe B.Y., Shahi A.                                  | Framework for Automated Model-Based e-Permitting System for Municipal Jurisdictions                          | Journal of management in engineering                  | 2019 | 10.1061/(ASCE)ME.1943-5479.0000712 |    | X  | X  |
| Shahnavaz F., Taghaddos H., Najafabadi R.S., Hermann U.          | Multi crane lift simulation using Building Information                                                       | Automation in construction                            | 2020 | 10.1016/j.autcon.2020.103305       |    | X  | X  |
| Shahsavand P., Marefat A., Parchamijalal M.                      | Causes of delays in construction industry and comparative delay analysis techniques with SCL protocol        | Engineering construction and architectural management | 2018 | 10.1108/ECAM-10-2016-0220          |    |    | X  |

| Authors                                                                                  | Article Title                                                                                                          | Source Title                                          | Year | DOI                                | C1 | C2 | C3 |
|------------------------------------------------------------------------------------------|------------------------------------------------------------------------------------------------------------------------|-------------------------------------------------------|------|------------------------------------|----|----|----|
| Shahtaheri M., Nasir H., Haas C.T.                                                       | Setting baseline rates for on-site work categories in the construction industry                                        | Journal of construction engineering and management    | 2015 | 10.1061/(ASCE)CO.1943-7862.0000959 |    | X  |    |
| Shahtaheri Y., Rausch C., West J., Haas C., Nahangi M.                                   | Managing risk in modular construction using dimensional and geometric tolerance strategies                             | Automation in construction                            | 2017 | 10.1016/j.autcon.2017.03.011       |    | X  | X  |
| Shan Y., Zhai D., Goodrum P.M., Haas C.T., Caldas C.H.                                   | Statistical Analysis of the Effectiveness of Management Programs in Improving Construction Labor Productivity on Large | Journal of management in engineering                  | 2016 | 10.1061/(ASCE)ME.1943-5479.0000375 |    | X  | X  |
| Shan, W; Jin, XB; Ren, J; Wang, YC; Xu, ZG; Fan, YT; Gu, ZM; Hong, CQ; Lin, JH; Zhou, YK | Ecological environment quality assessment based on remote sensing data for land consolidation                          | Journal of cleaner production                         | 2019 | 10.1016/j.jclepro.2019.118126      |    |    | X  |
| Shanbari H., Blinn N., Issa R.R.A.                                                       | Using augmented reality video in enhancing masonry and roof component comprehension for construction management        | Engineering construction and architectural management | 2016 | 10.1108/ECAM-01-2016-0028          |    |    | X  |
| Sharma V., Caldas C.H., Mulva S.P.                                                       | Development of metrics and an external benchmarking program for healthcare                                             | International journal of construction management      | 2019 | 10.1080/15623599.2019.1573490      |    |    | X  |
| Sharma, KK; Israel, D; Bhalla, B                                                         | Does previous work experience matter in students' learning in higher project management education?                     | Engineering construction and architectural management |      | 10.1108/ECAM-01-2019-0015          |    |    | X  |
| Sharma, VK; Sharma, SK; Singh, AP                                                        | Risk enablers modelling for infrastructure projects using Bayesian belief network                                      | International journal of construction management      |      | 10.1080/15623599.2019.1678218      |    |    | X  |

| Authors                                                                    | Article Title                                                                                                          | Source Title                                          | Year | DOI                                | C1 | C2 | C3 |
|----------------------------------------------------------------------------|------------------------------------------------------------------------------------------------------------------------|-------------------------------------------------------|------|------------------------------------|----|----|----|
| Shayan S., Pyung Kim K.,<br>Tam V.W.Y.                                     | Critical success factor<br>analysis for effective risk<br>management at the execution<br>stage of a construction       | International journal of<br>construction management   | 2019 | 10.1080/15623599.2019.1624678      |    |    | X  |
| Shdid C.A., Andary E.,<br>Chowdhury A.G., Ahmad<br>I.U.                    | Project performance rating<br>model for water and<br>wastewater treatment plant<br>public projects                     | Journal of management in<br>engineering               | 2019 | 10.1061/(ASCE)ME.1943-5479.0000678 |    |    | X  |
| Shealy T., Klotz L.                                                        | Well-Endowed Rating<br>Systems: How Modified<br>Defaults Can Lead to More<br>Sustainable Performance                   | Journal of construction<br>engineering and management | 2015 | 10.1061/(ASCE)CO.1943-7862.0001009 |    |    | X  |
| Shehu Z., Holt G.D., Endut<br>I.R., Akintoye A.                            | Analysis of characteristics<br>affecting completion time for<br>Malaysian construction                                 | Built environment project<br>and asset management     | 2015 | 10.1108/BEPAM-10-2013-0056         |    |    | X  |
| Sheikhhoshkar, M;<br>Rahimian, FP; Kaveh, MH;<br>Hosseini, MR; Edwards, DJ | Automated planning of<br>concrete joint layouts with<br>4D-BIM                                                         | Automation in construction                            | 2019 | 10.1016/j.autcon.2019.102943       |    | X  | X  |
| Shen W., Choi B., Lee S.,<br>Tang W., Haas C.T.                            | How to Improve Interface<br>Management Behaviors in<br>EPC Projects: Roles of<br>Formal Practices and Social           | Journal of management in<br>engineering               | 2018 | 10.1061/(ASCE)ME.1943-5479.0000639 |    |    | X  |
| Shen W., Tang W., Wang S.,<br>Duffield C.F., Hui F.K.P.,<br>You R.         | Enhancing Trust-Based<br>Interface Management in<br>International Engineering-<br>Procurement-Construction<br>Projects | Journal of construction<br>engineering and management | 2017 | 10.1061/(ASCE)CO.1943-7862.0001351 | X  | X  | X  |
| Shen Y., Koh T.Y.,<br>Rowlinson S., Bridge A.J.                            | Empirical Investigation of<br>Factors Contributing to the<br>Psychological Safety Climate<br>on Construction Sites     | Journal of construction<br>engineering and management | 2015 | 10.1061/(ASCE)CO.1943-7862.0001021 |    |    | X  |

| Authors                                                                        | Article Title                                                                                                                                       | Source Title                                                                                         | Year         | DOI                                                        | C1 | C2 | C3     |
|--------------------------------------------------------------------------------|-----------------------------------------------------------------------------------------------------------------------------------------------------|------------------------------------------------------------------------------------------------------|--------------|------------------------------------------------------------|----|----|--------|
| Shen Y., Tuuli M.M., Xia B.,<br>Koh T.Y., Rowlinson S.                         | Toward a model for forming<br>psychological safety climate<br>in construction project<br>management                                                 | International journal of<br>project management                                                       | 2015         | 10.1016/j.ijproman.2014.04.009                             |    |    | X      |
| Shen, KC; Cheng, C; Li, XD;<br>Zhang, ZH                                       | Environmental Cost-Benefit<br>Analysis of Prefabricated<br>Public Housing in Beijing                                                                | Sustainability                                                                                       | 2019         | 10.3390/su11010207                                         |    | X  |        |
| Shen, WX; Tang, WZ;<br>Siripanan, A; Lei, Z;<br>Duffield, CF; Hui, FKP         | Understanding the Green<br>Technical Capabilities and<br>Barriers to Green Buildings<br>in Developing Countries: A<br>Case Study of Thailand        | Sustainability                                                                                       | 2018         | 10.3390/su10103585                                         |    |    | X      |
| Shen, WX; Tang, WZ; Yu,<br>WY; Duffield, CF; Hui, FKP;<br>Wei, YP; Fang, J     | Causes of contractors' claims<br>in international engineering-<br>procurement-construction<br>projects                                              | Journal of civil engineering<br>and management                                                       | 2017         | 10.3846/13923730.2017.1281839                              |    |    | X      |
| Sherratt F., Crapper M.,<br>Foster-Smith L., Walsh S.<br>Sherratt F., Ivory C. | Safety and volunteer<br>construction workers<br>Managing "a little bit<br>unsafe": complexity,<br>construction safety and                           | Construction management<br>and economics<br>Engineering construction and<br>architectural management | 2015<br>2019 | 10.1080/01446193.2015.1024269<br>10.1108/ECAM-09-2018-0376 |    |    | X<br>X |
| Sherratt F., Sherratt S., Ivory<br>C.                                          | Challenging complacency in<br>construction management<br>research: the case of PPPs                                                                 | Construction management<br>and economics                                                             | 2020         | 10.1080/01446193.2020.1744674                              |    |    | X      |
| Shevchenko, G;<br>Ustinovichius, L; Walasek, D                                 | The Evaluation of the<br>Contractor's Risk in<br>Implementing the Investment<br>Projects in Construction by<br>Using the Verbal Analysis<br>Methods | Sustainability                                                                                       | 2019         | 10.3390/su11092660                                         |    |    | X      |

| Authors                                 | Article Title                                                                                                                         | Source Title                          | Year | DOI                           | C1 | C2 | C3 |
|-----------------------------------------|---------------------------------------------------------------------------------------------------------------------------------------|---------------------------------------|------|-------------------------------|----|----|----|
| Shi, H; You, Z; Feng, ZM; Yang, YZ      | Numerical Simulation and Spatial Distribution of Transportation Accessibility in the Regions Involved in the Belt and Road Initiative | Sustainability                        | 2019 | 10.3390/su11226187            |    |    | X  |
| Shi, HY; Chen, J; Liu, SN; Sivakumar, B | The Role of Large Dams in Promoting Economic Development under the Pressure of Population                                             | Sustainability                        | 2019 | 10.3390/su11102965            |    |    | X  |
| Shi, JG; Si, HY; Wu, GD; Su, YY; Lan, J | Critical Factors to Achieve Dockless Bike-Sharing Sustainability in China: A Stakeholder-Oriented Network Perspective                 | Sustainability                        | 2018 | 10.3390/su10062090            |    |    | X  |
| Shi, QQ; Zhu, JB; Hertogh, M; Sheng, ZH | Incentive Mechanism of Prefabrication in Mega Projects with Reputational                                                              | Sustainability                        | 2018 | 10.3390/su10041260            |    |    | X  |
| Shi, YS; Cao, XY; Fu, DM; Wang, YC      | Comprehensive Value Discovery of Land Consolidation Projects: An Empirical Analysis of Shanghai, China                                | Sustainability                        | 2018 | 10.3390/su10062039            |    | X  | X  |
| Shi, YX; Shi, YS                        | Spatio-Temporal Variation Characteristics and Driving Forces of Farmland Shrinkage in Four Metropolises in East Asia                  | Sustainability                        | 2020 | 10.3390/su12030754            |    | X  |    |
| Shibeika A., Harty C.                   | Diffusion of digital innovation in construction: a case study of a UK                                                                 | Construction management and economics | 2015 | 10.1080/01446193.2015.1077982 |    |    | X  |

| Authors                                                        | Article Title                                                                                                                     | Source Title                                          | Year | DOI                                | C1 | C2 | C3 |
|----------------------------------------------------------------|-----------------------------------------------------------------------------------------------------------------------------------|-------------------------------------------------------|------|------------------------------------|----|----|----|
| Shinde A.M., Dikshit A.K.,<br>Singh R.K., Campana P.E.         | Life cycle analysis based<br>comprehensive<br>environmental performance<br>evaluation of Mumbai<br>Suburban Railway, India        | Journal of cleaner production                         | 2018 | 10.1016/j.jclepro.2018.04.022      |    |    | X  |
| Shoar S., Banaitis A.                                          | Application of fuzzy fault<br>tree analysis to identify<br>factors influencing<br>construction labor<br>productivity: A high-rise | Journal of civil engineering<br>and management        | 2018 | 10.3846/jcem.2019.7785             |    |    | X  |
| Shojaei P., bolvardizadeh A.                                   | Rough MCDM model for<br>green supplier selection in<br>Iran: a case of university<br>construction project                         | Built environment project<br>and asset management     | 2020 | 10.1108/BEPAM-11-2019-0117         |    |    | X  |
| Shokri S., Ahn S., Lee S.,<br>Haas C.T., Haas R.C.G.           | Current status of interface<br>management in construction:<br>Drivers and effects of<br>systematic interface<br>management        | Journal of construction<br>engineering and management | 2016 | 10.1061/(ASCE)CO.1943-7862.0001035 |    | X  | X  |
| Shokri S., Haas C.T., Haas<br>R.C.G., Lee S.H.                 | Interface-management<br>process for managing risks in<br>complex capital projects                                                 | Journal of construction<br>engineering and management | 2016 | 10.1061/(ASCE)CO.1943-7862.0000990 |    |    | X  |
| Shrestha A., Chan T.-K.,<br>Aibinu A.A., Chen C.,<br>Martek I. | Risks in PPP water projects<br>in China: Perspective of local<br>governments                                                      | Journal of construction<br>engineering and management | 2017 | 10.1061/(ASCE)CO.1943-7862.0001313 |    |    | X  |
| Shrestha K.J., Jeong H.D.                                      | Computational algorithm to<br>automate as-built schedule<br>development using digital<br>daily work reports                       | Automation in construction                            | 2017 | 10.1016/j.autcon.2017.09.008       |    | X  |    |
| Shrestha K.J., Jeong H.D.,<br>Gransberg D.D.                   | Multidimensional Highway<br>Construction Cost Indexes<br>Using Dynamic Item Basket                                                | Journal of construction<br>engineering and management | 2017 | 10.1061/(ASCE)CO.1943-7862.0001307 |    | X  |    |

| Authors                                            | Article Title                                                                                                                       | Source Title                                          | Year | DOI                                | C1 | C2 | C3 |
|----------------------------------------------------|-------------------------------------------------------------------------------------------------------------------------------------|-------------------------------------------------------|------|------------------------------------|----|----|----|
| Shrestha P.P., Shrestha K.K., Zeleke H.B.          | Probability of change orders and the effect on cost and schedule for new public                                                     | Engineering construction and architectural management | 2019 | 10.1108/ECAM-01-2018-0017          |    |    | X  |
| Shrestha, BK; Choi, JO; Kwak, YH; Shane, JS        | How Design Standardization CSFs Can Impact Project Performance of Capital                                                           | Journal of management in engineering                  | 2020 | 10.1061/(ASCE)ME.1943-5479.0000792 |    | X  |    |
| Shrivastava S., Chini A.                           | Analysis of interaction among the factors affecting delay in construction projects using interpretive structural modelling approach | International journal of construction management      |      | 10.1080/15623599.2020.1728486      |    |    | X  |
| Shurrah M., Abbasi G., Al Khazaleh R.              | Contractor Energy Information System: Energy-Savings Tool for Building                                                              | Journal of management in engineering                  | 2016 | 10.1061/(ASCE)ME.1943-5479.0000412 |    |    | X  |
| Shurrah, J; Hussain, M; Khan, M                    | Evaluating the effect of motivational dimensions on the construction project managers in Jordan                                     | Engineering construction and architectural management | 2018 | 10.1108/ECAM-01-2017-0001          |    |    | X  |
| Siemietycki, M                                     | Green and sustainable practices in the construction industry A confirmatory factor analysis approach                                | Engineering construction and architectural management | 2019 | 10.1108/ECAM-02-2018-0056          |    |    | X  |
| Siami-Irdemoosa E., Dindarloo S.R., Sharifzadeh M. | Work breakdown structure (WBS) development for underground construction                                                             | Automation in construction                            | 2015 | 10.1016/j.autcon.2015.07.016       |    |    | X  |
| Siebelink, S; Voordijk, JT; Adriaanse, A           | Developing and Testing a Tool to Evaluate BIM Maturity: Sectoral Analysis in the Dutch Construction                                 | Journal of construction engineering and management    | 2018 | 10.1061/(ASCE)CO.1943-7862.0001527 |    |    | X  |
|                                                    | The making and impacts of a classic text in megaproject management: The case of cost overrun research                               | International journal of project management           | 2018 | 10.1016/j.ijproman.2016.07.003     |    |    | X  |

| Authors                                         | Article Title                                                                                                                                                                                 | Source Title                                          | Year | DOI                                | C1 | C2 | C3 |
|-------------------------------------------------|-----------------------------------------------------------------------------------------------------------------------------------------------------------------------------------------------|-------------------------------------------------------|------|------------------------------------|----|----|----|
| Sierra, LA; Pellicer, E; Yepes, V               | Social Sustainability in the Lifecycle of Chilean Public Infrastructure                                                                                                                       | Journal of construction engineering and management    | 2016 | 10.1061/(ASCE)CO.1943-7862.0001099 |    |    | X  |
| Siew R.Y.J.                                     | Health and safety communication strategy in a Malaysian construction company: A case study                                                                                                    | International journal of construction management      | 2015 | 10.1080/15623599.2015.1084469      |    |    | X  |
| Silungwe, CKT; Khatleli, N                      | An analysis of the allocation of pertinent risks in the Zambian building sector using Pareto analysis                                                                                         | International journal of construction management      | 2020 | 10.1080/15623599.2018.1484853      |    |    | X  |
| Silverio-Fernandez, MA; Renukappa, S; Suresh, S | Evaluating critical success factors for implementing smart devices in the construction industry An empirical study in the                                                                     | Engineering construction and architectural management | 2019 | 10.1108/ECAM-02-2018-0085          |    |    | X  |
| Simatupang T.M., Sridharan R.                   | A critical analysis of supply chain issues in construction heavy equipment                                                                                                                    | International journal of construction management      | 2016 | 10.1080/15623599.2016.1142250      | X  |    |    |
| Simion, CP; Nicolescu, C; Vrincut, M            | Green Procurement in Romanian Construction Projects. A Cluster Analysis of the Barriers and Enablers to Green Procurement in Construction Projects from the Bucharest-Ilfov Region of Romania | Sustainability                                        | 2019 | 10.3390/su11226231                 |    |    | X  |
| Simu, K; Lidelow, H                             | Middle managers' perceptions of operations strategies at construction contractors                                                                                                             | Construction management and economics                 | 2019 | 10.1080/01446193.2018.1542739      |    | X  | X  |



| Authors                                                   | Article Title                                                                                           | Source Title                                          | Year | DOI                                | C1 | C2 | C3 |
|-----------------------------------------------------------|---------------------------------------------------------------------------------------------------------|-------------------------------------------------------|------|------------------------------------|----|----|----|
| Sinesilassie E.G., Tripathi K.K., Tabish S.Z.S., Jha K.N. | Modeling success factors for public construction projects with the SEM approach: engineer's perspective | Engineering construction and architectural management | 2019 | 10.1108/ECAM-04-2018-0162          |    |    | X  |
| Sinesilassie, EG; Tabish, SZS; Jha, KN                    | Critical factors affecting schedule performance A case of Ethiopian public construction projects -      | Engineering construction and architectural management | 2017 | 10.1108/ECAM-03-2016-0062          |    |    | X  |
| Sing, MCP; Love, PED; Edwards, DJ; Liu, JX                | Dynamic Modeling of Workforce Planning for Infrastructure Projects                                      | Journal of management in engineering                  | 2016 | 10.1061/(ASCE)ME.1943-5479.0000463 |    |    | X  |
| Sinha, AK; Jha, KN                                        | Financing constraints of public-private partnership projects in India                                   | Engineering construction and architectural management |      | 10.1108/ECAM-06-2018-0237          |    |    | X  |
| Sinoh S.S., Othman F., Ibrahim Z.                         | Critical success factors for BIM implementation: a Malaysian case study                                 | Engineering construction and architectural management | 2020 | 10.1108/ECAM-09-2019-0475          |    |    | X  |
| Siu M.-F.F., Leung W.-Y.J., Chan W.-M.D.                  | A data-driven approach to identify-quantify-analyse construction risk for Hong Kong NEC projects        | Journal of civil engineering and management           | 2018 | 10.3846/jcem.2018.6483             |    |    | X  |
| Sjekavica Klepop, M; Radujkovic, M                        | EARLY WARNING SYSTEM IN MANAGING WATER INFRASTRUCTRE PROJECTS                                           | Journal of civil engineering and management           | 2019 | 10.3846/jcem.2019.10404            |    |    | X  |
| Slaton T., Hernandez C., Akhavian R.                      | Construction activity recognition with convolutional recurrent                                          | Automation in construction                            | 2020 | 10.1016/j.autcon.2020.103138       |    | X  |    |
| Small E.P., Bakry I., Ayyash L.                           | Evaluating the effect of TQM on MEP construction productivity and project delivery in Dubai             | International journal of construction management      | 2019 | 10.1080/15623599.2019.1602584      |    |    | X  |

| Authors                                                                     | Article Title                                                                                                          | Source Title                                     | Year | DOI                            | C1 | C2 | C3 |
|-----------------------------------------------------------------------------|------------------------------------------------------------------------------------------------------------------------|--------------------------------------------------|------|--------------------------------|----|----|----|
| Smith S.D.                                                                  | Safety first? Production pressures and the implications on safety and                                                  | Construction management and economics            | 2019 | 10.1080/01446193.2018.1537501  |    | X  | X  |
| Smyth H., Anvuur A.M., Kusuma I.                                            | Integrated solutions for total asset management through “RIVANS”                                                       | Built environment project and asset management   | 2017 | 10.1108/BEPAM-07-2015-0034     |    |    | X  |
| Smyth H., Duryan M., Kusuma I.                                              | Service design for marketing in construction: Tactical implementation in the “business development                     | Built environment project and asset management   | 2019 | 10.1108/BEPAM-04-2018-0061     |    |    | X  |
| Smyth, H; Lecoivre, L; Vaesken, P                                           | Co-creation of value and the project context: Towards application on the case of Hinkley Point C Nuclear Power Station | International journal of project management      | 2018 | 10.1016/j.ijproman.2017.04.013 |    |    | X  |
| Snyder, JR; Dilaver, O; Stephenson, LC; Mackie, JE; Smith, SD               | Agent-based modelling and construction - reconstructing antiquity's largest infrastructure project                     | Construction management and economics            | 2018 | 10.1080/01446193.2017.1403639  |    |    | X  |
| Soewin, E; Chinda, T                                                        | Development of a construction performance index in the construction industry: system dynamics                          | International journal of construction management |      | 10.1080/15623599.2020.1742633  |    |    | X  |
| Solis-Guzman, J; Rivero-Camacho, C; Alba-Rodriguez, D; Martinez-Rocamora, A | Carbon Footprint Estimation Tool for Residential Buildings for Non-Specialized Users: OERCO2                           | Sustainability                                   | 2018 | 10.3390/su10051359             |    |    | X  |
| Sol-Sánchez M., Moreno-Navarro F., García-Travé G., Rubio-Gámez M.C.        | Analysing industrial manufacturing in-plant and in-service performance of asphalt mixtures cleaner                     | Journal of cleaner production                    | 2016 | 10.1016/j.jclepro.2016.02.046  |    | X  |    |

| Authors                                            | Article Title                                                                                                                                    | Source Title                                       | Year | DOI                                | C1 | C2 | C3 |
|----------------------------------------------------|--------------------------------------------------------------------------------------------------------------------------------------------------|----------------------------------------------------|------|------------------------------------|----|----|----|
| Soltani M.M., Zhu Z., Hammad A.                    | Automated annotation for visual recognition of construction resources using synthetic images                                                     | Automation in construction                         | 2016 | 10.1016/j.autcon.2015.10.002       |    | X  |    |
| Soman R.K., Whyte J.K.                             | Codification Challenges for Data Science in Construction                                                                                         | Journal of construction engineering and management | 2020 | 10.1061/(ASCE)CO.1943-7862.0001846 |    | X  |    |
| Son H., Kim C., Kwon Cho Y.                        | Automated Schedule Updates Using As-Built Data and a 4D Building Information                                                                     | Journal of management in engineering               | 2017 | 10.1061/(ASCE)ME.1943-5479.0000528 |    | X  | X  |
| Son J., Khwaja N., Milligan D.S.                   | Planning-Phase Estimation of Construction Time for a Large Portfolio of Highway                                                                  | Journal of construction engineering and management | 2019 | 10.1061/(ASCE)CO.1943-7862.0001637 |    |    | X  |
| Son J.W., Rojas E.M., Shin S.-W.                   | Application of agent-based modeling and simulation to understanding complex management problems in cem research                                  | Journal of civil engineering and management        | 2015 | 10.3846/13923730.2014.893916       |    |    | X  |
| Son, J; Han, SH; Rojas, EM                         | Embeddedness and collaborative venture networks among Korean construction firms for overseas construction                                        | Journal of civil engineering and management        | 2015 | 10.3846/13923730.2014.890658       |    |    | X  |
| Song X., Xu J., Shen C., Peña-Mora F.              | Conflict resolution-motivated strategy towards integrated construction site layout and material logistics planning: A bi-stakeholder perspective | Automation in construction                         | 2018 | 10.1016/j.autcon.2017.12.018       |    |    | X  |
| Song Z., Shi G., Wang J., Wei H., Wang T., Zhou G. | Research on management and application of tunnel engineering based on BIM                                                                        | Journal of civil engineering and management        | 2019 | 10.3846/jcem.2019.11056            |    |    | X  |
| Song, MH; Fischer, M; Theis, P                     | Field Study on the Connection between BIM and Daily Work Orders                                                                                  | Journal of construction engineering and management | 2017 | 10.1061/(ASCE)CO.1943-7862.0001267 |    |    | X  |

| Authors                                          | Article Title                                                                                                                                 | Source Title                                             | Year | DOI                                | C1 | C2 | C3 |
|--------------------------------------------------|-----------------------------------------------------------------------------------------------------------------------------------------------|----------------------------------------------------------|------|------------------------------------|----|----|----|
| Song, ZY; Yang, F;<br>Boezeman, EJ; Li, XD       | Do new-generation<br>construction professionals be<br>provided what they desire at<br>work? A study on work<br>values and supplies-values fit | Engineering construction and<br>architectural management |      | 10.1108/ECAM-11-2019-0619          |    |    | X  |
| Sonmez R., Aminbakhsh S.,<br>Atan T.             | Activity Uncrashing<br>Heuristic with Noncritical<br>Activity Rescheduling<br>Method for the Discrete Time-<br>Cost Trade-Off Problem         | Journal of construction<br>engineering and management    | 2020 | 10.1061/(ASCE)CO.1943-7862.0001870 |    |    | X  |
| Sonmez R., Gürel M.                              | Hybrid Optimization Method<br>for Large-Scale Multimode<br>Resource-Constrained Project<br>Scheduling Problem                                 | Journal of management in<br>engineering                  | 2016 | 10.1061/(ASCE)ME.1943-5479.0000468 |    |    | X  |
| Sonmez R., Iranagh M.A.,<br>Uysal F.             | Critical Sequence Crashing<br>Heuristic for Resource-<br>Constrained Discrete Time-<br>Cost Trade-Off Problem                                 | Journal of construction<br>engineering and management    | 2016 | 10.1061/(ASCE)CO.1943-7862.0001077 |    |    | X  |
| Sonmez R., Sözgen B.                             | A support vector machine<br>method for bid/no bid<br>decision making                                                                          | Journal of civil engineering<br>and management           | 2017 | 10.3846/13923730.2017.1281836      |    |    | X  |
| Soviar, J; Holubcik, M;<br>Vodak, J              | Regional Cooperation<br>Ecosystem: Case of the Zilina<br>Self-Government Region<br>(Slovak Republic)                                          | Sustainability                                           | 2018 | 10.3390/su10072219                 |    |    | X  |
| Sparkling A.E., Mollaoglu S.,<br>Kirca A.        | Research Synthesis<br>Connecting Trends in<br>Architecture, Engineering,<br>and Construction Project                                          | Journal of management in<br>engineering                  | 2017 | 10.1061/(ASCE)ME.1943-5479.0000481 |    |    | X  |
| Sparrevik, M; Wangen, HF;<br>Fet, AM; De Boer, L | Green public procurement -<br>A case study of an innovative<br>building project in Norway                                                     | Journal of cleaner production                            | 2018 | 10.1016/j.jclepro.2018.04.048      |    |    | X  |

| Authors                                                                         | Article Title                                                                                                                               | Source Title                                             | Year | DOI                                | C1 | C2 | C3 |
|---------------------------------------------------------------------------------|---------------------------------------------------------------------------------------------------------------------------------------------|----------------------------------------------------------|------|------------------------------------|----|----|----|
| Stamatiou, DRI;<br>Kirytopoulos, KA; Ponis, ST;<br>Gayialis, S; Tatsiopoulou, I | A process reference model<br>for claims management in<br>construction supply chains:<br>the contractors' perspective                        | International journal of<br>construction management      | 2019 | 10.1080/15623599.2018.1452100      |    |    | X  |
| Stanford M.S., Molenaar<br>K.R.                                                 | Influence of Simplified<br>Procurement Methods on<br>Competition for Public<br>Sector Construction                                          | Journal of construction<br>engineering and management    | 2018 | 10.1061/(ASCE)CO.1943-7862.0001419 |    |    | X  |
| Staniskiene, E; Stankeviciute,<br>Z                                             | Social sustainability<br>measurement framework: The<br>case of employee perspective<br>in a CSR-committed                                   | Journal of cleaner production                            | 2018 | 10.1016/j.jclepro.2018.03.269      |    |    | X  |
| Staykova G., Underwood J.                                                       | Assessing collaborative<br>performance on construction<br>projects through knowledge<br>exchange A UK rail strategic<br>alliance case study | Engineering construction and<br>architectural management | 2017 | 10.1108/ECAM-08-2016-0179          | X  |    | X  |
| Styhre, A                                                                       | Close entanglements:<br>aligning the construction and<br>finance industries                                                                 | Construction management<br>and economics                 | 2019 | 10.1080/01446193.2018.1517941      |    | X  | X  |
| Styre A.                                                                        | Thinking about materiality:<br>the value of a construction<br>management and engineering<br>view*                                           | Construction management<br>and economics                 | 2017 | 10.1080/01446193.2016.1272760      |    |    | X  |
| Su L., Wang T., Li H., Cao<br>Y., Wang L.                                       | Multi-criteria decision<br>making for identification of<br>unbalanced bidding                                                               | Journal of civil engineering<br>and management           | 2020 | 10.3846/jcem.2019.11568            |    |    | X  |
| Su Y., Lucko G.                                                                 | Synthetic cash flow model<br>with singularity functions for<br>unbalanced bidding scenarios                                                 | Construction management<br>and economics                 | 2015 | 10.1080/01446193.2015.1012527      |    |    | X  |

| Authors                                                  | Article Title                                                                                                                                                                               | Source Title                                       | Year | DOI                                | C1 | C2 | C3 |
|----------------------------------------------------------|---------------------------------------------------------------------------------------------------------------------------------------------------------------------------------------------|----------------------------------------------------|------|------------------------------------|----|----|----|
| Su, Y; Lucko, G                                          | Synthetic Cash Flow Model with Singularity Functions. I: Theory for Periodic Phenomena and Time Value                                                                                       | Journal of construction engineering and management | 2015 | 10.1061/(ASCE)CO.1943-7862.0000938 |    |    | X  |
| Succar B., Poirier E.                                    | Lifecycle information transformation and exchange for delivering and managing digital and physical assets                                                                                   | Automation in construction                         | 2020 | 10.1016/j.autcon.2020.103090       |    |    | X  |
| Sui, Y; Ding, R; Wang, HQ                                | A novel approach for occupational health and safety and environment risk assessment for nuclear power plant construction project                                                            | Journal of cleaner production                      | 2020 | 10.1016/j.jclepro.2020.120945      |    |    | X  |
| Sullivan J., Asmar M.E., Chalhouh J., Obeid H.           | Two Decades of Performance Comparisons for Design-Build, Construction Manager at Risk, and Design-Bid-Build: Quantitative Analysis of the State of Knowledge on Project Cost, Schedule, and | Journal of construction engineering and management | 2017 | 10.1061/(ASCE)CO.1943-7862.0001282 |    |    | X  |
| Sun J., Lei K., Cao L., Zhong B., Wei Y., Li J., Yang Z. | Text visualization for construction document information management                                                                                                                         | Automation in construction                         | 2020 | 10.1016/j.autcon.2019.103048       |    |    | X  |
| Sun J., Ren X., Anumba C.J.                              | Analysis of Knowledge-Transfer Mechanisms in Construction Project Cooperation Networks                                                                                                      | Journal of management in engineering               | 2019 | 10.1061/(ASCE)ME.1943-5479.0000663 |    |    | X  |
| Sun, PW; Zhang, N; Zuo, J; Mao, RC; Gao, XF; Duan, HB    | Characterizing the generation and flows of building interior decoration and renovation waste: A case study in Shenzhen City                                                                 | Journal of cleaner production                      | 2020 | 10.1016/j.jclepro.2020.121077      |    |    | X  |

| Authors                                                 | Article Title                                                                                                                    | Source Title                                          | Year | DOI                            | C1 | C2 | C3 |
|---------------------------------------------------------|----------------------------------------------------------------------------------------------------------------------------------|-------------------------------------------------------|------|--------------------------------|----|----|----|
| Sun, YY; Wang, T; Gu, X                                 | A Sustainable Development Perspective on Cooperative Culture, Knowledge Flow, and Innovation Network Governance Performance      | Sustainability                                        | 2019 | 10.3390/su11216126             |    |    | X  |
| Sundquist V., Hulthén K., Gadde L.E.                    | From project partnering towards strategic supplier                                                                               | Engineering construction and architectural management | 2018 | 10.1108/ECAM-08-2016-0177      |    |    | X  |
| Sundquist, V; Gadde, LE; Hulthen, K                     | Reorganizing construction logistics for improved performance                                                                     | Construction management and economics                 | 2018 | 10.1080/01446193.2017.1356931  |    | X  | X  |
| Suprpto M., Bakker H.L.M., Mooi H.G., Moree W.          | Sorting out the essence of owner-contractor collaboration in capital                                                             | International journal of project management           | 2015 | 10.1016/j.ijproman.2014.05.001 |    |    | X  |
| Suprpto, M; Bakker, HLM; Mooi, HG                       | Relational factors in owner-contractor collaboration: The mediating role of                                                      | International journal of project management           | 2015 | 10.1016/j.ijproman.2015.03.015 |    |    | X  |
| Suprpto, M; Bakker, HLM; Mooi, HG; Hertogh, MJCM        | How do contract types and incentives matter to project performance?                                                              | International journal of project management           | 2016 | 10.1016/j.ijproman.2015.08.003 |    |    | X  |
| Suprun, E; Sahin, O; Stewart, RA; Panuwatwanich, K      | Examining transition pathways to construction innovation in Russia: a system dynamics approach                                   | International journal of construction management      |      | 10.1080/15623599.2019.1637628  |    |    | X  |
| Surlan N., Cekic Z., Torbica Z.                         | Use of value management workshops and critical success factors in introducing local experience on the international construction | Journal of civil engineering and management           | 2016 | 10.3846/13923730.2014.945950   |    |    | X  |
| Sutrisna M., Pellicer E., Torres-Machi C., Picornell M. | Exploring earned value management in the Spanish construction industry as a pathway to competitive advantage                     | International journal of construction management      | 2020 | 10.1080/15623599.2018.1459155  |    |    | X  |

| Authors                                                                            | Article Title                                                                                                              | Source Title                                          | Year | DOI                                | C1 | C2 | C3 |
|------------------------------------------------------------------------------------|----------------------------------------------------------------------------------------------------------------------------|-------------------------------------------------------|------|------------------------------------|----|----|----|
| Sutrisna, M; Goulding, J                                                           | Managing information flow and design processes to reduce design risks in offsite construction projects                     | Engineering construction and architectural management | 2019 | 10.1108/ECAM-11-2017-0250          |    | X  | X  |
| Szentes H.                                                                         | Reinforcing cycles involving inter- and intraorganizational paradoxical tensions when managing large construction projects | Construction management and economics                 | 2018 | 10.1080/01446193.2017.1315826      |    |    | X  |
| Szentes H., Eriksson P.E.                                                          | Paradoxical Organizational Tensions between Control and Flexibility When Managing Large                                    | Journal of construction engineering and management    | 2016 | 10.1061/(ASCE)CO.1943-7862.0001081 |    |    | X  |
| Szewczyk, B; Radziszewska-Zielina, E                                               | IT-based control and assessment of partnering relations in construction                                                    | Automation in construction                            | 2020 | 10.1016/j.autcon.2020.103201       |    | X  | X  |
| Tabassi A.A., Roufehaei K.M., Ramli M., Bakar A.H.A., Ismail R., Pakir             | Leadership competences of sustainable construction project managers                                                        | Journal of cleaner production                         | 2016 | 10.1016/j.jclepro.2016.02.076      |    |    | X  |
| Taghaddos H., Eslami A., Hermann U., AbouRizk S., Mohamed Y.                       | Auction-based Simulation for Industrial Crane Operations                                                                   | Automation in construction                            | 2019 | 10.1016/j.autcon.2019.03.015       |    | X  |    |
| Taghaddos H., Hermann U., Abbasi A.                                                | Automated Crane Planning and Optimization for modular construction                                                         | Automation in construction                            | 2018 | 10.1016/j.autcon.2018.07.009       |    | X  | X  |
| Taillandier F., Taillandier P., Tepeli E., Breysse D., Mehdizadeh R., Khartabil F. | A multi-agent model to manage risks in construction project (SMACC)                                                        | Automation in construction                            | 2015 | 10.1016/j.autcon.2015.06.005       |    |    | X  |
| Takano, Y; Ishii, N; Muraki, M                                                     | Determining bid markup and resources allocated to cost estimation in competitive                                           | Automation in construction                            | 2018 | 10.1016/j.autcon.2017.06.007       |    |    | X  |



| Authors                                                                  | Article Title                                                                                                                                            | Source Title                                       | Year | DOI                                | C1 | C2 | C3 |
|--------------------------------------------------------------------------|----------------------------------------------------------------------------------------------------------------------------------------------------------|----------------------------------------------------|------|------------------------------------|----|----|----|
| Talebi S., Koskela L.,<br>Tzortzopoulos P., Kagioglou M.                 | Tolerance management in construction: A conceptual framework                                                                                             | Sustainability                                     | 2020 | 10.3390/su12031039                 | X  |    | X  |
| Talebi S., Koskela L.,<br>Tzortzopoulos P., Kagioglou M., Krulikowski A. | Deploying geometric dimensioning and tolerancing in construction                                                                                         | Buildings                                          | 2020 | 10.3390/BUILDINGS10040062          | X  |    |    |
| Tan, T; Chen, K; Xue, F; Lu, WS                                          | Barriers to Building Information Modeling (BIM) implementation in China's prefabricated construction: An interpretive structural modeling (ISM) approach | Journal of cleaner production                      | 2019 | 10.1016/j.jclepro.2019.02.141      |    |    | X  |
| Tan, YT; Ochoa, JJ;<br>Langston, C; Shen, LY                             | An empirical study on the relationship between sustainability performance and business competitiveness of international construction contractors         | Journal of cleaner production                      | 2015 | 10.1016/j.jclepro.2015.01.034      |    |    | X  |
| Tan, YT; Xue, B; Cheung, YT                                              | Relationships between Main Contractors and Subcontractors and Their Impacts on Main Contractor Competitiveness: An                                       | Journal of construction engineering and management | 2017 | 10.1061/(ASCE)CO.1943-7862.0001311 |    |    | X  |
| Tang X., Chong H.-Y., Zhang W.                                           | Relationship between BIM Implementation and Performance of OSM                                                                                           | Journal of management in engineering               | 2019 | 10.1061/(ASCE)ME.1943-5479.0000704 |    |    | X  |
| Tang Y., Chen Y., Hua Y., Fu Y.                                          | Impacts of risk allocation on conflict negotiation costs in construction projects: Does managerial control matter?                                       | International journal of project management        | 2020 | 10.1016/j.ijproman.2020.03.002     |    |    | X  |
| Tang Z.W., Ng S.T., Skitmore M.                                          | Influence of procurement systems to the success of sustainable buildings                                                                                 | Journal of cleaner production                      | 2019 | 10.1016/j.jclepro.2019.01.213      |    |    | X  |

| Authors                                        | Article Title                                                                                                                  | Source Title                                       | Year | DOI                                | C1 | C2 | C3 |
|------------------------------------------------|--------------------------------------------------------------------------------------------------------------------------------|----------------------------------------------------|------|------------------------------------|----|----|----|
| Tang, FL; Ma, T; Guan, YS; Zhang, ZX           | Parametric modeling and structure verification of asphalt pavement based on BIM-ABAQUS                                         | Automation in construction                         | 2020 | 10.1016/j.autcon.2019.103066       |    |    | X  |
| Tang, FL; Ma, T; Zhang, JH; Guan, YS; Chen, LF | Integrating three-dimensional road design and pavement structure analysis based on                                             | Automation in construction                         | 2020 | 10.1016/j.autcon.2020.103152       |    |    | X  |
| Tang, W; Zhou, TC; Sun, J; Li, YR; Li, WP      | Accelerated Urban Expansion in Lhasa City and the Implications for Sustainable Development in a Plateau                        | Sustainability                                     | 2017 | 10.3390/su9091499                  |    |    | X  |
| Tang, YX; Wang, GB; Li, H; Cao, DP             | Dynamics of Collaborative Networks between Contractors and Subcontractors in the Construction Industry: Evidence from National | Journal of construction engineering and management | 2018 | 10.1061/(ASCE)CO.1943-7862.0001555 |    |    | X  |
| Tao, XY; Mao, C; Xie, FY; Liu, GW; Xu, PP      | Greenhouse gas emission monitoring system for manufacturing prefabricated components                                           | Automation in construction                         | 2018 | 10.1016/j.autcon.2018.05.015       |    |    | X  |
| Tatum C.B.                                     | Construction Engineering Research: Integration and Innovation                                                                  | Journal of construction engineering and management | 2018 | 10.1061/(ASCE)CO.1943-7862.0001445 |    |    | X  |
| Tavakolan M., Etemadinia H.                    | Fuzzy Weighted Interpretive Structural Modeling: Improved Method for Identification of Risk Interactions in Construction       | Journal of construction engineering and management | 2017 | 10.1061/(ASCE)CO.1943-7862.0001395 |    |    | X  |
| Tavakolan M., Mohammadi A.                     | Risk management workshop application: a case study of Ahwaz Urban Railway                                                      | International journal of construction management   | 2018 | 10.1080/15623599.2017.1325112      |    |    | X  |

| Authors                                                                                 | Article Title                                                                                                                     | Source Title                                          | Year | DOI                                | C1 | C2 | C3 |
|-----------------------------------------------------------------------------------------|-----------------------------------------------------------------------------------------------------------------------------------|-------------------------------------------------------|------|------------------------------------|----|----|----|
| Tavakolan M., Nikoukar S.                                                               | Developing an optimization financing cost-scheduling trade-off model in                                                           | International journal of construction management      | 2019 | 10.1080/15623599.2019.1619439      |    |    | X  |
| Tavares P., Costa C.M., Rocha L., Malaca P., Costa P., Moreira A.P., Sousa A., Veiga G. | Collaborative Welding System using BIM for Robotic Reprogramming and Spatial Augmented Reality                                    | Automation in construction                            | 2019 | 10.1016/j.autcon.2019.04.020       |    | X  |    |
| Tayeh B.A., Hallaq K.A., Zahoor H., Al Faqawi A.H.                                      | Techniques and benefits of implementing the last planner system in the Gaza Strip construction industry                           | Engineering construction and architectural management | 2019 | 10.1108/ECAM-01-2018-0039          |    |    | X  |
| Teizer J., Cheng T.                                                                     | Proximity hazard indicator for workers-on-foot near miss interactions with construction equipment and geo-referenced hazard areas | Automation in construction                            | 2015 | 10.1016/j.autcon.2015.09.003       |    | X  |    |
| Tembo-Silungwe, CK; Khatleli, N                                                         | Identification of Enablers and Constraints of Risk Allocation Using Structuration Theory in the                                   | Journal of construction engineering and management    | 2018 | 10.1061/(ASCE)CO.1943-7862.0001471 |    |    | X  |
| Teng, Y; Li, X; Wu, P; Wang, XY                                                         | Using cooperative game theory to determine profit distribution in IPD projects                                                    | International journal of construction management      | 2019 | 10.1080/15623599.2017.1358075      |    |    | X  |
| Teo M.M., Loosemore M.                                                                  | Understanding community protest from a project management perspective: A relationship-based approach                              | International journal of project management           | 2017 | 10.1016/j.ijproman.2017.08.004     |    |    | X  |
| Teo, P; Love, PED                                                                       | Re-Examining the Association between Quality and Safety Performance in Construction: From Heterogeneous to                        | Journal of construction engineering and management    | 2017 | 10.1061/(ASCE)CO.1943-7862.0001285 |    |    | X  |

| Authors                                            | Article Title                                                                                                                                | Source Title                                          | Year | DOI                            | C1 | C2 | C3 |
|----------------------------------------------------|----------------------------------------------------------------------------------------------------------------------------------------------|-------------------------------------------------------|------|--------------------------------|----|----|----|
| Tepeli E., Taillandier F., Breysse D.              | Multidimensional modelling of complex and strategic construction projects for a more effective risk                                          | International journal of construction management      | 2019 | 10.1080/15623599.2019.1606493  |    |    | X  |
| Tetik M., Peltokorpi A., Seppänen O., Holmström J. | Direct digital construction: Technology-based operations management practice for continuous improvement of construction industry performance | Automation in construction                            | 2019 | 10.1016/j.autcon.2019.102910   |    | X  | X  |
| Tezel A., Aziz Z.                                  | Visual management in highways construction and maintenance in England                                                                        | Engineering construction and architectural management | 2017 | 10.1108/ECAM-02-2016-0052      | X  |    | X  |
| Tezel A., Koskela L., Aziz Z.                      | Current condition and future directions for lean construction in highways projects: A small and medium-sized enterprises                     | International journal of project management           | 2018 | 10.1016/j.ijproman.2017.10.004 |    |    | X  |
| Thomson, CS; El-Haram, MA                          | Is the evolution of building sustainability assessment methods promoting the desired sharing of knowledge amongst project                    | Construction management and economics                 | 2019 | 10.1080/01446193.2018.1537502  |    |    | X  |
| Thunberg, M; Fredriksson, A                        | Bringing planning back into the picture - How can supply chain planning aid in dealing with supply chain-related problems in construction?   | Construction management and economics                 | 2018 | 10.1080/01446193.2017.1394579  |    |    | X  |
| Tijhuis W.                                         | Managing public-private partnerships: Dealing with business-culture influences                                                               | Built environment project and asset management        | 2015 | 10.1108/BEPAM-06-2013-0018     |    |    | X  |

| Authors                                                             | Article Title                                                                                                                                           | Source Title                                       | Year | DOI                                | C1 | C2 | C3 |
|---------------------------------------------------------------------|---------------------------------------------------------------------------------------------------------------------------------------------------------|----------------------------------------------------|------|------------------------------------|----|----|----|
| Todorovic, ML; Petrovic, DC; Mihic, MM; Obradovic, VL; Bushuyev, SD | Project success analysis framework: A knowledge-based approach in project management                                                                    | International journal of project management        | 2015 | 10.1016/j.ijproman.2014.10.009     |    |    | X  |
| Toh Y.Z., Goh Y.M., Guo B.H.W.                                      | Knowledge, Attitude, and Practice of Design for Safety: Multiple Stakeholders in the Singapore Construction                                             | Journal of construction engineering and management | 2017 | 10.1061/(ASCE)CO.1943-7862.0001279 |    |    | X  |
| Tokdemir O.B., Erol H., Dikmen I.                                   | Delay Risk Assessment of Repetitive Construction Projects Using Line-of-Balance Scheduling and Monte Carlo Simulation                                   | Journal of construction engineering and management | 2019 | 10.1061/(ASCE)CO.1943-7862.0001595 |    |    | X  |
| Toland M.D., Bowen P., Dueber D.M.                                  | Multidimensional Item Response Theory Analysis of Work-Related, After-Hours Contact, and Psychosocial Measurement Scales for Construction Professionals | Journal of construction engineering and management | 2020 | 10.1061/(ASCE)CO.1943-7862.0001845 |    | X  | X  |
| Tommelein I.D.                                                      | Design science research in construction management: multi-disciplinary collaboration on the                                                             | Construction management and economics              | 2020 | 10.1080/01446193.2020.1718723      |    |    | X  |
| Tommelein, ID                                                       | Journey toward Lean Construction: Pursuing a Paradigm Shift in the AEC Industry                                                                         | Journal of construction engineering and management | 2015 | 10.1061/(ASCE)CO.1943-7862.0000926 |    |    | X  |
| Tong R., Cheng M., Zhang L., Liu M., Yang X., Li X., Yin W.         | The construction dust-induced occupational health risk using Monte-Carlo                                                                                | Journal of cleaner production                      | 2018 | 10.1016/j.jclepro.2018.02.286      |    | X  |    |

| Authors                                                                             | Article Title                                                                                                                                                    | Source Title                                             | Year | DOI                                | C1 | C2 | C3 |
|-------------------------------------------------------------------------------------|------------------------------------------------------------------------------------------------------------------------------------------------------------------|----------------------------------------------------------|------|------------------------------------|----|----|----|
| Toppinen, A; Sauru, M;<br>Patari, S; Lahtinen, K;<br>Tuppura, A                     | Internal and external factors<br>of competitiveness shaping<br>the future of wooden<br>multistory construction in<br>Finland and Sweden                          | Construction management<br>and economics                 | 2019 | 10.1080/01446193.2018.1513162      |    |    | X  |
| Toriola-Coker L.O., Alaka<br>H., Agbali M., Bello W.A.,<br>Pathirage C., Oyedele L. | Marginalization of end-user<br>stakeholder's in public<br>private partnership road<br>projects in Nigeria                                                        | International journal of<br>construction management      | 2020 | 10.1080/15623599.2020.1766189      |    |    | X  |
| Townsend R., Gershon M.                                                             | Attaining Successful<br>Construction Project<br>Execution through Personnel<br>and Communication                                                                 | Journal of construction<br>engineering and management    | 2020 | 10.1061/(ASCE)CO.1943-7862.0001892 |    |    | X  |
| Townsend, K; Loudoun, R;<br>Markwell, K                                             | The role of line managers in<br>creating and maintaining<br>healthy work environments<br>on project construction sites                                           | Construction management<br>and economics                 | 2016 | 10.1080/01446193.2016.1195911      |    | X  | X  |
| Trach, R; Pawluk, K; Lendo-<br>Siwicka, M                                           | The assessment of the effect<br>of BIM and IPD on<br>construction projects in                                                                                    | International journal of<br>construction management      |      | 10.1080/15623599.2020.1742636      |    |    | X  |
| Tran D.H.                                                                           | Optimizing time–cost in<br>generalized construction<br>projects using multiple-<br>objective social group<br>optimization and multi-<br>criteria decision-making | Engineering construction and<br>architectural management | 2020 | 10.1108/ECAM-08-2019-0412          |    |    | X  |
| Tran D.H., Long L.D.                                                                | Project scheduling with time,<br>cost and risk trade-off using<br>adaptive multiple objective<br>differential evolution                                          | Engineering construction and<br>architectural management | 2018 | 10.1108/ECAM-05-2017-0085          |    |    | X  |
| Tran D.Q., Brihac A.,<br>Nguyen L.D., Kwak Y.H.                                     | Project Cost Implications of<br>Competitive Guaranteed<br>Maximum Price Contracts                                                                                | Journal of management in<br>engineering                  | 2018 | 10.1061/(ASCE)ME.1943-5479.0000594 |    |    | X  |

| Authors                                           | Article Title                                                                                                  | Source Title                                             | Year | DOI                                | C1 | C2 | C3 |
|---------------------------------------------------|----------------------------------------------------------------------------------------------------------------|----------------------------------------------------------|------|------------------------------------|----|----|----|
| Tran D.Q., Diraviam G.,<br>Minchin R.E., Jr.      | Performance of highway<br>design-bid-build and design-<br>build projects by work types                         | Journal of construction<br>engineering and management    | 2018 | 10.1061/(ASCE)CO.1943-7862.0001437 |    |    | X  |
| Tran D.Q., Hallowell M.R.,<br>Molenaar K.R.       | Construction management<br>challenges and best practices<br>for rural transit projects                         | Journal of management in<br>engineering                  | 2015 | 10.1061/(ASCE)ME.1943-5479.0000297 |    |    | X  |
| Tran D.Q., Harper C.M.,<br>Smadi A.M., Mohamed M. | Staffing needs and utilization<br>for alternative contracting<br>methods in highway design<br>and construction | Engineering construction and<br>architectural management | 2020 | 10.1108/ECAM-07-2019-0342          |    |    | X  |
| Tran D.Q., Molenaar K.R.                          | Risk-Based Project Delivery<br>Selection Model for Highway<br>Design and Construction                          | Journal of construction<br>engineering and management    | 2015 | 10.1061/(ASCE)CO.1943-7862.0001024 |    |    | X  |
| Tran, DQ; Nguyen, LD;<br>Faught, A                | Examination of<br>communication processes in<br>design-build project delivery                                  | Engineering construction and<br>architectural management | 2017 | 10.1108/ECAM-12-2015-0192          | X  |    | X  |
| Tran, KT; Nguyen, PV                              | Corporate Social<br>Responsibility: Findings from<br>the Vietnamese Paint                                      | Sustainability                                           | 2020 | 10.3390/su12031044                 |    |    | X  |
| Trebbe, M; Hartmann, T;<br>Doree, A               | 4D CAD models to support<br>the coordination of<br>construction activities                                     | Automation in construction                               | 2015 | 10.1016/j.autcon.2014.10.002       |    |    | X  |
| Trinh M.T., Feng Y.                               | Impact of Project Complexity<br>on Construction Safety<br>Performance: Moderating<br>Role of Resilient Safety  | Journal of construction<br>engineering and management    | 2020 | 10.1061/(ASCE)CO.1943-7862.0001758 |    |    | X  |
| Trinh M.T., Feng Y.,<br>Mohamed S.                | Framework for Measuring<br>Resilient Safety Culture in<br>Vietnam's Construction<br>Environment                | Journal of construction<br>engineering and management    | 2019 | 10.1061/(ASCE)CO.1943-7862.0001602 |    |    | X  |

| Authors                                                 | Article Title                                                                                                  | Source Title                                          | Year | DOI                                | C1 | C2 | C3 |
|---------------------------------------------------------|----------------------------------------------------------------------------------------------------------------|-------------------------------------------------------|------|------------------------------------|----|----|----|
| Trinh, MT; Feng, YB; Jin, XH                            | Conceptual Model for Developing Resilient Safety Culture in the Construction Environment                       | Journal of construction engineering and management    | 2018 | 10.1061/(ASCE)CO.1943-7862.0001522 |    |    | X  |
| Tripathi K.K., Hasan A., Neeraj Jha K.                  | Evaluating performance of construction organizations using fuzzy preference relation technique                 | International journal of construction management      | 2019 | 10.1080/15623599.2019.1613210      |    |    | X  |
| Tripathi K.K., Jha K.N.                                 | Application of fuzzy preference relation for evaluating success factors of construction organisations          | Engineering construction and architectural management | 2018 | 10.1108/ECAM-01-2017-0004          |    |    | X  |
| Tripathi K.K., Jha K.N.                                 | An empirical study on factors leading to the success of construction organizations in India                    | International journal of construction management      | 2019 | 10.1080/15623599.2017.1423162      |    |    | X  |
| Tripathi K.K., Jha K.N.                                 | Determining Success Factors for a Construction Organization: A Structural Equation Modeling Approach           | Journal of management in engineering                  | 2018 | 10.1061/(ASCE)ME.1943-5479.0000569 |    |    | X  |
| Tsang Y.T., Fung I.W.H., Tam V.W.Y., Sing C.P., Lu C.T. | Development of an accident modelling in the Hong Kong construction industry                                    | International journal of construction management      | 2017 | 10.1080/15623599.2016.1222664      |    |    | X  |
| Tsehayae A.A., Fayek A.R.                               | Developing and Optimizing Context-Specific Fuzzy Inference System-Based Construction Labor Productivity Models | Journal of construction engineering and management    | 2016 | 10.1061/(ASCE)CO.1943-7862.0001127 |    |    | X  |
| Tsuruta, T; Miura, K; Miyaguchi, M                      | Mobile robot for marking free access floors at construction sites                                              | Automation in construction                            | 2019 | 10.1016/j.autcon.2019.102912       |    | X  |    |



| Authors                                                                              | Article Title                                                                                                            | Source Title                                          | Year | DOI                            | C1 | C2 | C3 |
|--------------------------------------------------------------------------------------|--------------------------------------------------------------------------------------------------------------------------|-------------------------------------------------------|------|--------------------------------|----|----|----|
| Turner M., Lingard H.                                                                | Work–life fit: identification of demand and resource typologies within a systems                                         | Construction management and economics                 | 2016 | 10.1080/01446193.2016.1200737  |    |    | X  |
| Türkakın O.H., Manisalı E., Arditi D.                                                | Delay analysis in construction projects with no updated work schedules                                                   | Engineering construction and architectural management | 2020 | 10.1108/ECAM-09-2019-0470      |    | X  |    |
| Tzortzopoulos, P; Ma, L; Soliman, J; Koskela, L                                      | Evaluating Social Housing Retrofit Options to Support Clients' Decision MakingSimpler BIM Protocol                       | Sustainability                                        | 2019 | 10.3390/su11092507             |    |    | X  |
| Udawatta N., Zuo J., Chiveralls K., Zillante G.                                      | Attitudinal and behavioural approaches to improving waste management on construction projects in Australia: Benefits and | International journal of construction management      | 2015 | 10.1080/15623599.2015.1033815  |    |    | X  |
| Ueda T., Roberts E.S., Norton A., Styles D., Williams A.P., Ramos H.M., Gallagher J. | A life cycle assessment of the construction phase of eleven micro-hydropower installations in the UK                     | Journal of cleaner production                         | 2019 | 10.1016/j.jclepro.2019.01.267  |    |    | X  |
| Ugural, MN; Giritli, H; Urbanski, M                                                  | Determinants of the Turnover Intention of Construction Professionals: A Mediation Analysis                               | Sustainability                                        | 2020 | 10.3390/su12030954             |    |    | X  |
| Ul Haq, S; Gu, DX; Liang, CY; Abdullah, I                                            | Project governance mechanisms and the performance of software development projects: Moderating role of                   | International journal of project management           | 2019 | 10.1016/j.ijproman.2019.02.008 |    |    | X  |
| Ullah, F; Thaheem, MJ                                                                | Concession period of public private partnership projects: industry-academia gap                                          | International journal of construction management      | 2018 | 10.1080/15623599.2017.1333400  |    | X  | X  |

| Authors                                            | Article Title                                                                                                | Source Title                                          | Year | DOI                           | C1 | C2 | C3 |
|----------------------------------------------------|--------------------------------------------------------------------------------------------------------------|-------------------------------------------------------|------|-------------------------------|----|----|----|
| Ulubeyli S., Arslan V., Kivrak S.                  | A semiotic analysis of cartoons about occupational health and safety issues in the construction workplace    | Construction management and economics                 | 2015 | 10.1080/01446193.2015.1024270 |    | X  |    |
| Ulubeyli, S; Kazanci, O                            | Holistic sustainability assessment of green building industry in Turkey                                      | Journal of cleaner production                         | 2018 | 10.1016/j.jclepro.2018.08.111 |    | X  |    |
| Ulubeyli, S; Kazaz, A; Soyocpur, B; Er, B          | Quality function deployment in the speculative house-building market: how to satisfy high-income             | International journal of construction management      | 2015 | 10.1080/15623599.2015.1033807 |    |    | X  |
| Umar A.A., Zawawi N.A.W.A., Abdul-Aziz A.-R.       | Exploratory factor analysis of skills requirement for PPP contract governance                                | Built environment project and asset management        | 2019 | 10.1108/BEPAM-01-2018-0011    |    |    | X  |
| Umeokafor N., Evangelinos K., Windapo A.           | Strategies for improving complex construction health and safety regulatory                                   | International journal of construction management      | 2020 | 10.1080/15623599.2019.1707853 |    |    | X  |
| Umer W., Li H., Lu W., Szeto G.P.Y., Wong A.Y.L.   | Development of a tool to monitor static balance of construction workers for proactive fall safety management | Automation in construction                            | 2018 | 10.1016/j.autcon.2018.07.024  |    | X  | X  |
| Ustundag A., Cevikcan E.                           | Maximizing the value of residential projects using fuzzy rule based linear                                   | Journal of civil engineering and management           | 2016 | 10.3846/13923730.2014.914102  |    |    | X  |
| Utama, WP; Chan, APC; Gao, R; Zahoor, H            | Making international expansion decision for construction enterprises with multiple criteria: a literature    | International journal of construction management      | 2018 | 10.1080/15623599.2017.1315527 |    |    | X  |
| Utama, WP; Chan, APC; Zahoor, H; Gao, R; Jumas, DY | Making decision toward overseas construction projects An application based on adaptive neuro fuzzy           | Engineering construction and architectural management | 2019 | 10.1108/ECAM-01-2018-0016     |    |    | X  |

| Authors                                                                      | Article Title                                                                                            | Source Title                                          | Year | DOI                                | C1 | C2 | C3 |
|------------------------------------------------------------------------------|----------------------------------------------------------------------------------------------------------|-------------------------------------------------------|------|------------------------------------|----|----|----|
| Uttam K., Le Lann Roos C.                                                    | Competitive dialogue procedure for sustainable public procurement                                        | Journal of cleaner production                         | 2015 | 10.1016/j.jclepro.2014.08.031      |    |    | X  |
| Uusitalo P., Seppänen O., Peltokorpi A., Olivieri H.                         | Solving design management problems using lean design management: the role of trust                       | Engineering construction and architectural management | 2019 | 10.1108/ECAM-03-2018-0135          | X  |    | X  |
| Vahdatikhaki F., Langari S.M., Taher A., El Ammari K., Hammad A.             | Enhancing coordination and safety of earthwork equipment operations using Multi-Agent System             | Automation in construction                            | 2017 | 10.1016/j.autcon.2017.04.008       |    |    | X  |
| Vahdatikhaki, F; El Ammari, K; Langroodi, AK; Miller, S; Hammad, A; Doree, A | Beyond data visualization: A context-realistic construction equipment training simulators                | Automation in construction                            | 2019 | 10.1016/j.autcon.2019.102853       |    |    | X  |
| Waidyasekara K.G.A.S., De Silva L., Rameezdeen R.                            | Water use efficiency and conservation during construction: drivers, barriers and practices               | Built environment project and asset management        | 2016 | 10.1108/BEPAM-09-2015-0052         |    |    | X  |
| Vakhitova T.V.                                                               | Rethinking conservation: Managing cultural heritage as an inhabited cultural                             | Built environment project and asset management        | 2015 | 10.1108/BEPAM-12-2013-0069         |    |    | X  |
| Valente C.P., Brandalise F.M.P., Formoso C.T.                                | Model for Devising Visual Management Systems on Construction Sites                                       | Journal of construction engineering and management    | 2019 | 10.1061/(ASCE)CO.1943-7862.0001596 |    |    | X  |
| Valentin V., Naderpajouh N., Abraham D.M.                                    | Integrating the Input of Stakeholders in Infrastructure Risk Assessment                                  | Journal of management in engineering                  | 2018 | 10.1061/(ASCE)ME.1943-5479.0000638 |    |    | X  |
| Valero E., Forster A., Bosché F., Hyslop E., Wilson L., Turmel A.            | Automated defect detection and classification in ashlar masonry walls using machine                      | Automation in construction                            | 2019 | 10.1016/j.autcon.2019.102846       |    | X  |    |
| Valipour A., Yahaya N., Md Noor N., Kildiene S., Sarvari H., Mardani A.      | A fuzzy analytic network process method for risk prioritization in freeway PPP projects: An Iranian case | Journal of civil engineering and management           | 2015 | 10.3846/13923730.2015.1051104      |    |    | X  |

| Authors                                                                | Article Title                                                                                                       | Source Title                                          | Year | DOI                                | C1 | C2 | C3 |
|------------------------------------------------------------------------|---------------------------------------------------------------------------------------------------------------------|-------------------------------------------------------|------|------------------------------------|----|----|----|
| Valipour, A; Yahaya, N; Md Noor, N; Antucheviciene, J; Tamosaitiene, J | HYBRID SWARA-COPRAS METHOD FOR RISK ASSESSMENT IN DEEP FOUNDATION EXCAVATION PROJECT: AN IRANIAN CASE               | Journal of civil engineering and management           | 2017 | 10.3846/13923730.2017.1281842      |    |    | X  |
| van den Berg, M; Voordijk, H; Adriaanse, A                             | Recovering building elements for reuse (or not) - Ethnographic insights into selective demolition practices         | Journal of cleaner production                         | 2020 | 10.1016/j.jclepro.2020.120332      |    |    | X  |
| van den Berg, M; Voordijk, H; Adriaanse, A; Hartmann, T                | Experiencing Supply Chain Optimizations: A Serious Gaming Approach                                                  | Journal of construction engineering and management    | 2017 | 10.1061/(ASCE)CO.1943-7862.0001388 |    |    | X  |
| Van Os, A; Van Berkel, F; De Gilder, D; Van Dyck, C; Groenewegen, P    | Project risk as identity threat: explaining the development and consequences of risk discourse in an infrastructure | International journal of project management           | 2015 | 10.1016/j.ijproman.2014.10.016     |    |    | X  |
| Wanberg J., Javernick-Will A., Taylor J.E.                             | Mechanisms to Initiate Knowledge-Sharing Connections in Communities of Practice                                     | Journal of construction engineering and management    | 2017 | 10.1061/(ASCE)CO.1943-7862.0001399 |    |    | X  |
| Wandahl S.                                                             | Practitioners PercePtion of value in construction                                                                   | Journal of civil engineering and management           | 2015 | 10.3846/13923730.2014.897971       |    |    | X  |
| Wang C., Li B., Li B., Baldwin A.                                      | Case study of "project controlling" on a large HOPSCA project in China                                              | Engineering construction and architectural management | 2017 | 10.1108/ECAM-07-2015-0118          |    |    | X  |
| Wang C., Loo S.C., Yap J.B.H., Abdul-Rahman H.                         | Novel Capability-Based Risk Assessment Calculator for Construction Contractors Venturing Overseas                   | Journal of construction engineering and management    | 2019 | 10.1061/(ASCE)CO.1943-7862.0001696 |    |    | X  |
| Wang C., Mohd-Rahim F.A., Chan Y.Y., Abdul-Rahman H.                   | Fuzzy Mapping on Psychological Disorders in Construction Management                                                 | Journal of construction engineering and management    | 2017 | 10.1061/(ASCE)CO.1943-7862.0001217 |    |    | X  |

| Authors                                              | Article Title                                                                                                                          | Source Title                                          | Year | DOI                                | C1 | C2 | C3 |
|------------------------------------------------------|----------------------------------------------------------------------------------------------------------------------------------------|-------------------------------------------------------|------|------------------------------------|----|----|----|
| Wang C., Zhang S., Du C.,<br>Pan F., Xue L.          | A real-time online structure-safety analysis approach consistent with dynamic construction schedule of underground caverns             | Journal of construction engineering and management    | 2016 | 10.1061/(ASCE)CO.1943-7862.0001153 |    |    | X  |
| Wang C.M., Xu B.B., Zhang S.J., Chen Y.Q.            | Influence of personality and risk propensity on risk perception of Chinese construction project                                        | International journal of project management           | 2016 | 10.1016/j.ijproman.2016.07.004     |    |    | X  |
| Wang D., Arditi D., Damci A.                         | Construction Project Managers' Motivators and                                                                                          | Journal of construction engineering and management    | 2017 | 10.1061/(ASCE)CO.1943-7862.0001261 |    |    | X  |
| Wang D., Fang S., Li K.                              | Dynamic changes of governance mechanisms in mega construction projects in China: The mediating role of opportunism                     | Engineering construction and architectural management | 2019 | 10.1108/ECAM-03-2018-0137          |    |    | X  |
| Wang D., Li H., Chen J.                              | Detecting and measuring construction workers' vigilance through hybrid kinematic-EEG signals                                           | Automation in construction                            | 2019 | 10.1016/j.autcon.2018.12.018       |    |    | X  |
| Wang D., Li K., Fang S.                              | Analyzing the factors influencing trust in a construction project: Evidence from a Sino-German eco-park in China                       | Journal of civil engineering and management           | 2018 | 10.3846/jcem.2018.3069             |    |    | X  |
| Wang G., He Q., Meng X., Locatelli G., Yu T., Yan X. | Exploring the impact of megaproject environmental responsibility on organizational citizenship behaviors for the environment: A social | International journal of project management           | 2017 | 10.1016/j.ijproman.2017.04.008     |    |    | X  |

| Authors                                         | Article Title                                                                                                                                       | Source Title                                          | Year | DOI                                | C1 | C2 | C3 |
|-------------------------------------------------|-----------------------------------------------------------------------------------------------------------------------------------------------------|-------------------------------------------------------|------|------------------------------------|----|----|----|
| Wang G., Xia C., Cao D.                         | State and determinants of inter-regional market entry practices in the Chinese construction industry: evidence from national                        | Engineering construction and architectural management | 2020 | 10.1108/ECAM-06-2019-0336          |    | X  | X  |
| Wang H., Chen D., Duan H., Yin F., Niu Y.       | Characterizing urban building metabolism with a 4D-GIS model: A case study in China                                                                 | Journal of cleaner production                         | 2019 | 10.1016/j.jclepro.2019.04.341      |    |    | X  |
| Wang H., Zhang X., Lu W.                        | Improving Social Sustainability in Construction: Conceptual Framework Based on Social                                                               | Journal of management in engineering                  | 2018 | 10.1061/(ASCE)ME.1943-5479.0000607 |    |    | X  |
| Wang H.-W., Lin J.-R., Zhang J.-P.              | Work package-based information modeling for resource-constrained scheduling of construction                                                         | Automation in construction                            | 2020 | 10.1016/j.autcon.2019.102958       |    |    | X  |
| Wang J., Shou W., Wang X., Wu P.                | Developing and evaluating a framework of total constraint management for improving workflow in liquefied natural gas construction                   | Construction management and economics                 | 2016 | 10.1080/01446193.2016.1227460      |    |    | X  |
| Wang L., Leite F.                               | Formalized knowledge representation for spatial conflict coordination of mechanical, electrical and plumbing (MEP) systems in new building projects | Automation in construction                            | 2016 | 10.1016/j.autcon.2015.12.020       |    |    | X  |
| Wang Q., Lee B.D., Augenbroe G., Paredis C.J.J. | An application of normative decision theory to the valuation of energy efficiency investments under                                                 | Automation in construction                            | 2017 | 10.1016/j.autcon.2016.09.005       |    | X  |    |

| Authors                                                   | Article Title                                                                                                                                                  | Source Title                                          | Year | DOI                                | C1 | C2 | C3 |
|-----------------------------------------------------------|----------------------------------------------------------------------------------------------------------------------------------------------------------------|-------------------------------------------------------|------|------------------------------------|----|----|----|
| Wang S., Xu Z., Zhang W., Fan Z., Feng S., Liu Y.         | Effects of aggregate reuse for overpass reconstruction-extension projects on energy conservation and greenhouse gas reduction: A case study from Shanghai City | Journal of cleaner production                         | 2017 | 10.1016/j.jclepro.2016.10.007      |    |    | X  |
| Wang S.-H., Wang W.-C., Hsu P.-Y., Chen C.-H., Wang K.-C. | Establishing engineering S-curves to evaluate supervision engineer allocations for highway                                                                     | Journal of civil engineering and management           | 2016 | 10.3846/13923730.2014.928363       |    |    | X  |
| Wang T., Abdallah M., Clevenger C., Monghasemi S.         | Time–cost–quality trade-off analysis for planning construction projects                                                                                        | Engineering construction and architectural management | 2019 | 10.1108/ECAM-12-2017-0271          |    |    | X  |
| Wang T., Chan A.P.C., He Q., Xu J.                        | Identifying the gaps in construction megaproject management research: a bibliographic analysis                                                                 | International journal of construction management      | 2020 | 10.1080/15623599.2020.1735610      |    |    | X  |
| Wang T., Gao S., Li X., Ning X.                           | A meta-network-based risk evaluation and control method for industrialized building construction projects                                                      | Journal of cleaner production                         | 2018 | 10.1016/j.jclepro.2018.09.127      |    |    | X  |
| Wang T., Tang W., Du L., Duffield C.F., Wei Y.            | Relationships among Risk Management, Partnering, and Contractor Capability in International EPC Project Delivery                                               | Journal of management in engineering                  | 2016 | 10.1061/(ASCE)ME.1943-5479.0000459 |    |    | X  |
| Wang T., Tang W., Qi D., Shen W., Huang M.                | Enhancing Design Management by Partnering in Delivery of International EPC Projects: Evidence from Chinese Construction                                        | Journal of construction engineering and management    | 2016 | 10.1061/(ASCE)CO.1943-7862.0001082 |    |    | X  |

| Authors                                                 | Article Title                                                                                                | Source Title                                          | Year | DOI                             | C1 | C2 | C3 |
|---------------------------------------------------------|--------------------------------------------------------------------------------------------------------------|-------------------------------------------------------|------|---------------------------------|----|----|----|
| Wang T., Wang S., Zhang L., Huang Z., Li Y.             | A major infrastructure risk-assessment framework: Application to a cross-sea route project in China          | International journal of project management           | 2016 | 10.1016/j.ijproman.2015.12.006  |    |    | X  |
| Wang T.-K., Ford D.N., Chong H.-Y., Zhang W.            | Causes of delays in the construction phase of Chinese building projects                                      | Engineering construction and architectural management | 2018 | 10.1108/ECAM-10-2016-0227       |    |    | X  |
| Wang Y., Chen P.-C., Ma H.-W., Cheng K.-L., Chang C.-Y. | Socio-economic metabolism of urban construction materials: A case study of the Taipei metropolitan area      | Resources, conservation and recycling                 | 2018 | 10.1016/j.resconrec.2016.08.019 |    | X  |    |
| Wang Y., Chen Y., Fu Y., Zhang W.                       | Do prior interactions breed cooperation in construction projects? The mediating role of contracts            | International journal of project management           | 2017 | 10.1016/j.ijproman.2017.02.019  |    |    | X  |
| Wang Y., Cui P., Liu J.                                 | Analysis of the risk-sharing ratio in PPP projects based on government minimum revenue guarantees            | International journal of project management           | 2018 | 10.1016/j.ijproman.2018.01.007  |    |    | X  |
| Wang Y., Feng K., Lu W.                                 | An environmental assessment and optimization method for contractors                                          | Journal of cleaner production                         | 2017 | 10.1016/j.jclepro.2016.11.097   |    |    | X  |
| Wang Y., Han Q., de Vries B., Zuo J.                    | How the public reacts to social impacts in construction projects? A structural equation modeling study       | International journal of project management           | 2016 | 10.1016/j.ijproman.2016.07.008  |    |    | X  |
| Wang Y., Jin X.                                         | Structural risk of diversified project financing of city investment company in China based on the best worst | Engineering construction and architectural management | 2019 | 10.1108/ECAM-05-2019-0249       |    |    | X  |



| Authors                                               | Article Title                                                                                                                                | Source Title                                          | Year | DOI                                | C1 | C2 | C3 |
|-------------------------------------------------------|----------------------------------------------------------------------------------------------------------------------------------------------|-------------------------------------------------------|------|------------------------------------|----|----|----|
| Wang Y., Jin X.                                       | Determine the optimal capital structure of BOT projects using interval numbers with Tianjin Binhai New District Metro Z4 line in China as an | Engineering construction and architectural management | 2019 | 10.1108/ECAM-07-2018-0259          |    |    | X  |
| Wang Y., Le Y., Dai J.                                | Incorporation of alternatives and importance levels in scheduling complex                                                                    | Journal of management in engineering                  | 2015 | 10.1061/(ASCE)ME.1943-5479.0000349 |    |    | X  |
| Wang Y., Phd, Hu N., Zuo J., Rameezdeen R.            | Project Management Personnel Turnover in Public Sector Construction Organizations in China                                                   | Journal of management in engineering                  | 2020 | 10.1061/(ASCE)ME.1943-5479.0000735 |    |    | X  |
| Wang Z., Rezazadeh Azar E.                            | BIM-based draft schedule generation in reinforced concrete-framed buildings                                                                  | Construction innovation                               | 2019 | 10.1108/CI-11-2018-0094            |    | X  |    |
| Wang, C; Chu, X; Zhan, JY; Wang, P; Zhang, F; Xin, ZL | Factors Contributing to Efficient Forest Production in the Region of the Three-North Shelter Forest                                          | Sustainability                                        | 2020 | 10.3390/su12010302                 |    |    | X  |
| Wang, D; Chen, JY; Zhao, D; Dai, F; Zheng, CJ; Wu, XB | Monitoring workers' attention and vigilance in construction activities through a wireless and wearable electroencephalography                | Automation in construction                            | 2017 | 10.1016/j.autcon.2017.02.001       |    |    | X  |
| Wang, DD; Fang, SZ; Fu, HW                            | THE EFFECTIVENESS OF EVOLUTIONARY GOVERNANCE IN MEGA CONSTRUCTION PROJECTS: A MODERATED MEDIATION MODEL OF RELATIONAL CONTRACT               | Journal of civil engineering and management           | 2019 | 10.3846/jcem.2019.9621             |    |    | X  |

| Authors                                                 | Article Title                                                                                                                         | Source Title                                          | Year | DOI                                | C1 | C2 | C3 |
|---------------------------------------------------------|---------------------------------------------------------------------------------------------------------------------------------------|-------------------------------------------------------|------|------------------------------------|----|----|----|
| Wang, DD; Fu, HW; Fang, SZ                              | The efficacy of trust for the governance of uncertainty and opportunism in megaprojects The moderating role of contractual control    | Engineering construction and architectural management | 2020 | 10.1108/ECAM-09-2018-0409          |    |    | X  |
| Wang, G; He, QH; Xia, B; Meng, XH; Wu, P                | Impact of Institutional Pressures on Organizational Citizenship Behaviors for the Environment: Evidence from                          | Journal of management in engineering                  | 2018 | 10.1061/(ASCE)ME.1943-5479.0000628 |    |    | X  |
| Wang, GB; Xue, YX; Skibniewski, MJ; Song, JL; Lu, H     | Analysis of Private Investors Conduct Strategies by Governments Supervising Public-Private Partnership Projects in the New Media      | Sustainability                                        | 2018 | 10.3390/su10124723                 |    |    | X  |
| Wang, J; Chi, HL; Shou, WC; Chong, HY; Wang, XY         | A Coordinated Approach for Supply-Chain Tracking in the Liquefied Natural Gas                                                         | Sustainability                                        | 2018 | 10.3390/su10124822                 |    |    | X  |
| Wang, JY; Yu, B; Tam, VWY; Li, J; Xu, XX                | Critical factors affecting willingness of design units towards construction waste minimization: An empirical study in Shenzhen, China | Journal of cleaner production                         | 2019 | 10.1016/j.jclepro.2019.02.253      |    |    | X  |
| Wang, KC; Wang, WC; Wang, HH; Hsu, PY; Wu, WH; Kung, CJ | Applying building information modeling to integrate schedule and cost for establishing construction                                   | Automation in construction                            | 2016 | 10.1016/j.autcon.2016.10.005       |    |    | X  |
| Wang, L; Leite, F                                       | Process Knowledge Capture in BIM-Based Mechanical, Electrical, and Plumbing Design Coordination                                       | Journal of computing in civil engineering             | 2016 | 10.1061/(ASCE)CP.1943-5487.0000484 | X  |    |    |
| Wang, LG; Zhang, XQ                                     | Bayesian Analytics for Estimating Risk Probability in PPP Waste-to-Energy                                                             | Journal of management in engineering                  | 2018 | 10.1061/(ASCE)ME.1943-5479.0000658 |    |    | X  |

| Authors                                              | Article Title                                                                                                                                    | Source Title                                          | Year | DOI                                | C1 | C2 | C3 |
|------------------------------------------------------|--------------------------------------------------------------------------------------------------------------------------------------------------|-------------------------------------------------------|------|------------------------------------|----|----|----|
| Wang, NN; Ma, MX; Wu, GB; Liu, YF; Gong, Z; Chen, XY | Conflicts concerning construction projects under the challenge of cleaner production - case study on government funded projects                  | Journal of cleaner production                         | 2019 | 10.1016/j.jclepro.2019.03.315      |    |    | X  |
| Wang, QK; Guo, Z; Mei, TT; Li, QY; Li, P             | Labor crew workspace analysis for prefabricated assemblies' installation: A 4D-BIM-based approach                                                | Engineering construction and architectural management | 2018 | 10.1108/ECAM-09-2016-0210          |    |    | X  |
| Wang, QK; Zuo, WW; Li, QY                            | ENGINEERING HARMONY UNDER MULTI-CONSTRAINT OBJECTIVES: THE PERSPECTIVE OF META-                                                                  | Journal of civil engineering and management           | 2020 | 10.3846/jcem.2020.11820            |    |    | X  |
| Wang, SH; Wang, WC; Wang, KC; Shih, SY               | Applying building information modeling to support fire safety                                                                                    | Automation in construction                            | 2015 | 10.1016/j.autcon.2015.02.001       |    |    | X  |
| Wang, T; He, QH; Lu, YJ; Yang, DL                    | How Does Organizational Citizenship Behavior (OCB) Affect the performance of megaprojects? Insights from a System Dynamic                        | Sustainability                                        | 2018 | 10.3390/su10061708                 |    | X  | X  |
| Wang, XQ; Xia, NN; Zhang, ZT; Wu, CL; Liu, BS        | Human Safety Risks and Their Interactions in China's Subways: Stakeholder                                                                        | Journal of management in engineering                  | 2017 | 10.1061/(ASCE)ME.1943-5479.0000544 |    |    | X  |
| Wang, XY; Peng, SZ; Ling, HB; Xu, HL; Ma, TT         | Do Ecosystem Service Value Increase and Environmental Quality Improve due to Large-Scale Ecological Water Conveyance in an Arid Region of China? | Sustainability                                        | 2019 | 10.3390/su11236586                 |    |    | X  |

| Authors                                                  | Article Title                                                                                                                       | Source Title                                          | Year | DOI                                | C1 | C2 | C3 |
|----------------------------------------------------------|-------------------------------------------------------------------------------------------------------------------------------------|-------------------------------------------------------|------|------------------------------------|----|----|----|
| Wang, Y; Liu, J; Zuo, J; Rameezdeen, R                   | Ways to improve the project management efficiency in a centralized public procurement system A structural equation modeling         | Engineering construction and architectural management | 2020 | 10.1108/ECAM-12-2018-0560          |    |    | X  |
| Wang, YQ; Thangasamy, VK; Hou, ZQ; Tiong, RLK; Zhang, LM | Collaborative relationship discovery in BIM project delivery: A social network analysis approach                                    | Automation in construction                            | 2020 | 10.1016/j.autcon.2020.103147       |    |    | X  |
| Vashani H., Sullivan J., El Asmar M.                     | DB 2020: Analyzing and forecasting design-build market trends                                                                       | Journal of construction engineering and management    | 2016 | 10.1061/(ASCE)CO.1943-7862.0001113 |    |    | X  |
| Vaux J.S., Kirk W.M.                                     | Relationship conflict in construction management: Performance and productivity problem                                              | Journal of construction engineering and management    | 2018 | 10.1061/(ASCE)CO.1943-7862.0001478 |    |    | X  |
| Wei H., Zheng S., Zhao L., Huang R.                      | BIM-based method calculation of auxiliary materials required in housing                                                             | Automation in construction                            | 2017 | 10.1016/j.autcon.2017.01.022       |    |    | X  |
| Wei Y., Miraglia S.                                      | Organizational culture and knowledge transfer in project-based organizations: Theoretical insights from a Chinese construction firm | International journal of project management           | 2017 | 10.1016/j.ijproman.2017.02.010     |    |    | X  |
| Weidman J., Dickerson D.E., Koebel C.T.                  | Intervention to improve purchasing decision-maker perceptions of ventilated                                                         | Journal of construction engineering and management    | 2015 | 10.1061/(ASCE)CO.1943-7862.0000961 |    |    | X  |
| Weidman J., Dickerson D.E., Koebel C.T.                  | Effective Intervention Strategy to Improve Worker Readiness to Adopt                                                                | Journal of construction engineering and management    | 2016 | 10.1061/(ASCE)CO.1943-7862.0001123 |    |    | X  |

| Authors                                         | Article Title                                                                                                                                  | Source Title                                          | Year | DOI                                | C1 | C2 | C3 |
|-------------------------------------------------|------------------------------------------------------------------------------------------------------------------------------------------------|-------------------------------------------------------|------|------------------------------------|----|----|----|
| Wen Q., Qiang M.                                | Coordination and Knowledge Sharing in Construction Project-Based Organization: A Longitudinal Structural Equation Model Analysis               | Automation in construction                            | 2016 | 10.1016/j.autcon.2016.06.002       |    |    | X  |
| Wen Q., Qiang M., An N.                         | Collaborating with construction management consultants in project execution: Responsibility delegation and capability                          | Journal of construction engineering and management    | 2017 | 10.1061/(ASCE)CO.1943-7862.0001312 |    |    | X  |
| Wen Z., Hu Y., Lee J.C.K., Luo E., Li H., Ke S. | Approaches and policies for promoting industrial park recycling transformation (IPRT) in China: Practices                                      | Journal of cleaner production                         | 2018 | 10.1016/j.jclepro.2017.10.202      |    | X  | X  |
| Verweij S.                                      | Producing satisfactory outcomes in the implementation phase of PPP infrastructure projects: A fuzzy set qualitative comparative analysis of 27 | International journal of project management           | 2015 | 10.1016/j.ijproman.2015.08.006     |    |    | X  |
| Wesz J.G.B., Formoso C.T., Tzortzopoulos P.     | Planning and controlling design in engineered-to-order prefabricated building                                                                  | Engineering construction and architectural management | 2018 | 10.1108/ECAM-02-2016-0045          |    |    | X  |
| Whang S.-W., Flanagan R., Kim S., Kim S.        | Contractor-Led Critical Design Management Factors in High-Rise Building Projects Involving                                                     | Journal of construction engineering and management    | 2017 | 10.1061/(ASCE)CO.1943-7862.0001242 |    |    | X  |
| Whang S.-W., Park K.S., Kim S.                  | Critical success factors for implementing integrated construction project delivery                                                             | Engineering construction and architectural management | 2019 | 10.1108/ECAM-02-2019-0073          |    |    | X  |

| Authors                                             | Article Title                                                                                                                                   | Source Title                                          | Year | DOI                                | C1 | C2 | C3 |
|-----------------------------------------------------|-------------------------------------------------------------------------------------------------------------------------------------------------|-------------------------------------------------------|------|------------------------------------|----|----|----|
| Vick S., Brilakis I.                                | Road Design Layer Detection in Point Cloud Data for Construction Progress Monitoring                                                            | Journal of computing in civil engineering             | 2018 | 10.1061/(ASCE)CP.1943-5487.0000772 |    | X  |    |
| Wijekoon C., Manewa A., Ross A.D.                   | Enhancing the value of facilities information management (FIM) through                                                                          | Engineering construction and architectural management | 2018 | 10.1108/ECAM-02-2016-0041          |    |    | X  |
| Viking A., Lidelöw S.                               | Exploring industrialized housebuilders' interpretations of local requirements using institutional logics                                        | Construction management and economics                 | 2015 | 10.1080/01446193.2015.1050966      |    |    | X  |
| Vilcekova, S; Selecka, I; Burdova, EK; Meciarova, L | Interlinked Sustainability Aspects of Low-Rise Residential Family House Development in Slovakia                                                 | Sustainability                                        | 2018 | 10.3390/su10113966                 |    |    | X  |
| Viles E., Rudeli N.C., Santilli A.                  | Causes of delay in construction projects: a                                                                                                     | Engineering construction and architectural management | 2019 | 10.1108/ECAM-01-2019-0024          |    |    | X  |
| Willar D., Trigunarsyah B., Coffey V.               | Organisational culture and quality management system implementation in Indonesian construction companies                                        | Engineering construction and architectural management | 2016 | 10.1108/ECAM-02-2015-0026          |    |    | X  |
| Williams J., Fugar F., Adinyira E.                  | Assessment of health and safety culture maturity in the construction industry in developing economies: A case of Ghanaian construction industry | Journal of engineering design and technology          | 2019 | 10.1108/JEDT-06-2019-0151          |    | X  |    |
| Vilventhan A., Rajadurai R.                         | 4D Bridge Information Modelling for management of bridge projects: a case study from India                                                      | Built environment project and asset management        | 2019 | 10.1108/BEPAM-05-2019-0045         |    |    | X  |

| Authors                                                                    | Article Title                                                                                                                        | Source Title                                          | Year | DOI                                | C1 | C2 | C3 |
|----------------------------------------------------------------------------|--------------------------------------------------------------------------------------------------------------------------------------|-------------------------------------------------------|------|------------------------------------|----|----|----|
| Vilventhan, A; Kalidindi, SN                                               | Interrelationships of factors causing delays in the relocation of utilities A cognitive mapping approach                             | Engineering construction and architectural management | 2016 | 10.1108/ECAM-10-2014-0127          |    |    | X  |
| Vincenzi, SL; Possan, E; de Andrade, DF; Pituco, MM; Santos, TD; Jasse, EP | Assessment of environmental sustainability perception through item response theory: A case study in Brazil                           | Journal of cleaner production                         | 2018 | 10.1016/j.jclepro.2017.09.217      |    |    | X  |
| Winch G.M.                                                                 | Project organizing as a problem in information                                                                                       | Construction management and economics                 | 2015 | 10.1080/01446193.2015.1021703      |    |    | X  |
| Viswanathan S.K., Jha K.N.                                                 | Critical risk factors in international construction projects: An Indian                                                              | Engineering construction and architectural management | 2020 | 10.1108/ECAM-04-2019-0220          |    |    | X  |
| Viswanathan, SK; Jha, KN                                                   | Risk mitigation modelling of international construction projects executed by Indian firms: a structural equation modelling approach  | Engineering construction and architectural management |      | 10.1108/ECAM-05-2019-0265          |    |    | X  |
| Viswanathan, SK; Tripathi, KK; Jha, KN                                     | Influence of risk mitigation measures on international construction project success criteria - a survey of Indian experiences        | Construction management and economics                 | 2020 | 10.1080/01446193.2019.1577987      |    |    | X  |
| Vogl B., Abdel-Wahab M.                                                    | Measuring the construction industry's productivity performance: Critique of international productivity comparisons at industry level | Journal of construction engineering and management    | 2015 | 10.1061/(ASCE)CO.1943-7862.0000944 |    | X  |    |
| Wojewnik-Filipkowska, A; Wegrzyn, J                                        | Understanding of Public-Private Partnership Stakeholders as a Condition of Sustainable Development                                   | Sustainability                                        | 2019 | 10.3390/su11041194                 |    |    | X  |

| Authors                                                            | Article Title                                                                                                                          | Source Title                                       | Year | DOI                                | C1 | C2 | C3 |
|--------------------------------------------------------------------|----------------------------------------------------------------------------------------------------------------------------------------|----------------------------------------------------|------|------------------------------------|----|----|----|
| Volk R., Luu T.H., Mueller-Roemer J.S., Sevilmis N., Schultmann F. | Deconstruction project planning of existing buildings based on automated acquisition and reconstruction of building                    | Automation in construction                         | 2018 | 10.1016/j.autcon.2018.03.017       |    | X  | X  |
| Volker L.                                                          | Looking out to look in: inspiration from social sciences for construction management research                                          | Construction management and economics              | 2019 | 10.1080/01446193.2018.1473619      |    |    | X  |
| Won J., Cheng J.C.P.                                               | Identifying potential opportunities of building information modeling for construction and demolition waste management and minimization | Automation in construction                         | 2017 | 10.1016/j.autcon.2017.02.002       |    |    | X  |
| Won, JW; Jung, W; Han, SH; Yun, S; Koo, B                          | What Enables a High-Risk Project to Yield High Return from a Construction Contractor's Perspective?                                    | Sustainability                                     | 2019 | 10.3390/su11215971                 |    |    | X  |
| Wondimu P.A., Klakegg O.J., Lohne J., Lædre O.                     | Experiences with Best-Value Procurement in Norway and the Netherlands                                                                  | Journal of construction engineering and management | 2020 | 10.1061/(ASCE)CO.1943-7862.0001814 |    |    | X  |
| Wondimu P.A., Lohne J., Lædre O.                                   | Competitive Dialogue in Norwegian Public Infrastructure Projects                                                                       | Journal of construction engineering and management | 2018 | 10.1061/(ASCE)CO.1943-7862.0001540 |    |    | X  |
| Wong J.K.W., Chan J.K.S., Wadu M.J.                                | Facilitating effective green procurement in construction projects: An empirical study of the enablers                                  | Journal of cleaner production                      | 2016 | 10.1016/j.jclepro.2016.07.001      |    |    | X  |
| Wong L., Wang Y., Law T., Lo C.T.                                  | Association of Root Causes in Fatal Fall-from-Height Construction Accidents in Hong Kong                                               | Journal of construction engineering and management | 2016 | 10.1061/(ASCE)CO.1943-7862.0001098 |    |    | X  |



| Authors                                  | Article Title                                                                                                                                              | Source Title                                          | Year | DOI                                | C1 | C2 | C3 |
|------------------------------------------|------------------------------------------------------------------------------------------------------------------------------------------------------------|-------------------------------------------------------|------|------------------------------------|----|----|----|
| Wong P.S.P., Zwar C.,<br>Gharaie E.      | Examining the drivers and<br>states of organizational<br>change for greater use of<br>prefabrication in construction                                       | Journal of construction<br>engineering and management | 2017 | 10.1061/(ASCE)CO.1943-7862.0001309 |    |    | X  |
| Woodhead R., Stephenson P.,<br>Morrey D. | Digital construction: From<br>point solutions to IoT                                                                                                       | Automation in construction                            | 2018 | 10.1016/j.autcon.2018.05.004       |    | X  | X  |
| Voordijk H., Adriaanse A.                | Engaged scholarship in<br>construction management<br>research: the adoption of<br>information and<br>communications technology<br>in construction projects | Construction management<br>and economics              | 2016 | 10.1080/01446193.2016.1139145      | X  |    | X  |
| Votto R., Lee Ho L.,<br>Berssaneti F.    | Applying and Assessing<br>Performance of Earned<br>Duration Management<br>Control Charts for EPC<br>Project Duration Monitoring                            | Journal of construction<br>engineering and management | 2020 | 10.1061/(ASCE)CO.1943-7862.0001765 |    |    | X  |
| Wu C., Fang D., Li N.                    | Roles of owners' leadership<br>in construction safety: The<br>case of high-speed railway<br>construction projects in                                       | International journal of<br>project management        | 2015 | 10.1016/j.ijproman.2015.07.005     |    |    | X  |
| Wu C., Li N., Fang D.                    | Leadership improvement and<br>its impact on workplace<br>safety in construction<br>projects: A conceptual model<br>and action research                     | International journal of<br>project management        | 2017 | 10.1016/j.ijproman.2017.08.013     |    |    | X  |
| Wu C., Wang F., Zou<br>P.X.W., Fang D.   | How safety leadership works<br>among owners, contractors<br>and subcontractors in<br>construction projects                                                 | International journal of<br>project management        | 2016 | 10.1016/j.ijproman.2016.02.013     |    |    | X  |

| Authors                                                | Article Title                                                                                                                  | Source Title                                          | Year | DOI                                | C1 | C2 | C3 |
|--------------------------------------------------------|--------------------------------------------------------------------------------------------------------------------------------|-------------------------------------------------------|------|------------------------------------|----|----|----|
| Wu G., Liu C., Zhao X., Zuo J.                         | Investigating the relationship between communication-conflict interaction and project success among construction project teams | International journal of project management           | 2017 | 10.1016/j.ijproman.2017.08.006     |    |    | X  |
| Wu G., Zhao X., Zuo J.                                 | Relationship between Project's Added Value and the Trust-Conflict Interaction among Project Teams                              | Journal of management in engineering                  | 2017 | 10.1061/(ASCE)ME.1943-5479.0000525 |    |    | X  |
| Wu G., Zhao X., Zuo J., Zillante G.                    | Effects of team diversity on project performance in construction projects                                                      | Engineering construction and architectural management | 2019 | 10.1108/ECAM-05-2018-0220          |    |    | X  |
| Wu H., Zuo J., Zillante G., Wang J., Yuan H.           | Status quo and future directions of construction and demolition waste research: A critical review                              | Journal of cleaner production                         | 2019 | 10.1016/j.jclepro.2019.118163      |    | X  | X  |
| Vu H.A., Cu V.H., Min L.X., Wang J.Q.                  | Risk analysis of schedule delays in international highway projects in Vietnam using a structural equation                      | Engineering construction and architectural management | 2017 | 10.1108/ECAM-06-2016-0138          |    |    | X  |
| Wu L., Bai H., Yuan C., Xu C.                          | Fanpce technique for risk assessment on subway station construction                                                            | Journal of civil engineering and management           | 2019 | 10.3846/jcem.2019.10373            |    |    | X  |
| Wu L., Ye K., Gong P., Xing J.                         | Perceptions of governments towards mitigating the environmental impacts of expressway construction projects: A case of China   | Journal of cleaner production                         | 2019 | 10.1016/j.jclepro.2019.117704      |    |    | X  |
| Wu P., Xu Y., Jin R., Lu Q., Madgwick D., Hancock C.M. | Perceptions towards risks involved in off-site construction in the integrated design & construction project                    | Journal of cleaner production                         | 2019 | 10.1016/j.jclepro.2018.12.226      |    |    | X  |

| Authors                                           | Article Title                                                                                                              | Source Title                                          | Year | DOI                                | C1 | C2 | C3 |
|---------------------------------------------------|----------------------------------------------------------------------------------------------------------------------------|-------------------------------------------------------|------|------------------------------------|----|----|----|
| Wu, CK; Chen, CJ; Jiang, R; Wu, P; Xu, B; Wang, J | Understanding laborers' behavioral diversities in multinational construction projects using integrated simulation approach | Engineering construction and architectural management | 2019 | 10.1108/ECAM-07-2018-0281          |    |    | X  |
| Wu, GD                                            | A Multi-Objective Trade-Off Model in Sustainable Construction Projects                                                     | Sustainability                                        | 2017 | 10.3390/su9111929                  |    |    | X  |
| Wu, GD; Hu, ZB; Zheng, JW; Zhao, XB; Zuo, J       | Effects of structure characteristics of project network on conflicts and project success                                   | Engineering construction and architectural management |      | 10.1108/ECAM-03-2019-0129          |    | X  | X  |
| Wu, GD; Qiang, GF; Zuo, J; Zhao, XB; Chang, RD    | What are the Key Indicators of Mega Sustainable Construction Projects? A Stakeholder-Network                               | Sustainability                                        | 2018 | 10.3390/su10082939                 |    |    | X  |
| Wu, GD; Zuo, J; Zhao, XB                          | Incentive Model Based on Cooperative Relationship in Sustainable Construction Projects                                     | Sustainability                                        | 2017 | 10.3390/su9071191                  |    |    | X  |
| Wu, LF; Jia, GS; Mackhaphonh, N                   | Case Study on Improving the Effectiveness of Public Participation in Public Infrastructure Megaprojects                    | Journal of construction engineering and management    | 2019 | 10.1061/(ASCE)CO.1943-7862.0001623 |    |    | X  |
| Wu, P; Song, YZ; Hu, X; Wang, XY                  | A Preliminary Investigation of the Transition from Green Building to Green Community: Insights from                        | Sustainability                                        | 2018 | 10.3390/su10061802                 |    |    | X  |
| Wu, XY; Chong, HY; Wang, G; Li, SQ                | The Influence of Social Capitalism on Construction Safety Behaviors: An Exploratory Megaproject Case Study                 | Sustainability                                        | 2018 | 10.3390/su10093098                 |    |    | X  |

| Authors                                            | Article Title                                                                                                                       | Source Title                                          | Year | DOI                           | C1 | C2 | C3 |
|----------------------------------------------------|-------------------------------------------------------------------------------------------------------------------------------------|-------------------------------------------------------|------|-------------------------------|----|----|----|
| Wu, XY; Zhao, WY; Ma, TS                           | Improving the Impact of Green Construction Management on the Quality of Highway Engineering                                         | Sustainability                                        | 2019 | 10.3390/su11071895            |    |    | X  |
| Wu, XY; Zhao, WY; Ma, TS; Yang, ZY                 | Improving the Efficiency of Highway Construction Project Management Using Lean Management                                           | Sustainability                                        | 2019 | 10.3390/su11133646            |    |    | X  |
| Wu, YC; Wu, YJ; Wu, SM                             | Development and Challenges of Social Enterprises in TaiwanFrom the Perspective of Community Development                             | Sustainability                                        | 2018 | 10.3390/su10061797            |    | X  |    |
| Wu, YN; Xu, CB; Li, LWY; Wang, Y; Chen, KF; Xu, RH | A risk assessment framework of PPP waste-to-energy incineration projects in China under 2-dimension linguistic environment          | Journal of cleaner production                         | 2018 | 10.1016/j.jclepro.2018.02.077 |    |    | X  |
| Wuni I.Y., Shen G.Q.                               | Critical success factors for management of the early stages of prefabricated prefinished volumetric construction project life cycle | Engineering construction and architectural management | 2020 | 10.1108/ECAM-10-2019-0534     | X  |    | X  |
| Wuni I.Y., Shen G.Q.                               | Towards a decision support for modular integrated construction: an integrative review of the primary                                | International journal of construction management      | 2019 | 10.1080/15623599.2019.1668633 |    |    | X  |
| Wuni I.Y., Shen G.Q.                               | Fuzzy modelling of the critical failure factors for modular integrated                                                              | Journal of cleaner production                         | 2020 | 10.1016/j.jclepro.2020.121595 |    |    | X  |

| Authors                                                   | Article Title                                                                                                                       | Source Title                                       | Year | DOI                                | C1 | C2 | C3 |
|-----------------------------------------------------------|-------------------------------------------------------------------------------------------------------------------------------------|----------------------------------------------------|------|------------------------------------|----|----|----|
| Wuni I.Y., Shen G.Q.                                      | Stakeholder management in prefabricated prefinished volumetric construction projects: benchmarking the key result areas             | Built environment project and asset management     | 2020 | 10.1108/BEPAM-02-2020-0025         | X  |    | X  |
| Wuni I.Y., Shen G.Q.P., Mahmud A.T.                       | Critical risk factors in the application of modular integrated construction: a systematic review                                    | International journal of construction management   | 2019 | 10.1080/15623599.2019.1613212      |    |    | X  |
| Wuni, IY; Shen, GQ; Osei-Kyei, R                          | Quantitative evaluation and ranking of the critical success factors for modular integrated construction projects                    | International journal of construction management   | 2020 | 10.1080/15623599.2020.1766190      | X  |    | X  |
| Vuorinen, L; Martinsuo, M                                 | Value-oriented stakeholder influence on infrastructure projects                                                                     | International journal of project management        | 2019 | 10.1016/j.ijproman.2018.10.003     |    |    | X  |
| Xia N., Zhong R., Wu C., Wang X., Wang S.                 | Assessment of Stakeholder-Related Risks in Construction Projects: Integrated Analyses of Risk Attributes and Stakeholder Influences | Journal of construction engineering and management | 2017 | 10.1061/(ASCE)CO.1943-7862.0001322 |    |    | X  |
| Xia N., Zou P.X.W., Griffin M.A., Wang X., Zhong R.       | Towards integrating construction risk management and stakeholder management: A systematic literature review and future              | International journal of project management        | 2018 | 10.1016/j.ijproman.2018.03.006     |    |    | X  |
| Xiahou X., Yuan J., Li Q., Skibniewski M.J.               | Validating DFS concept in lifecycle subway projects in china based on incident case analysis and network analysis                   | Journal of civil engineering and management        | 2018 | 10.3846/jcem.2018.300              |    |    | X  |
| Xiahou, XE; Tang, YC; Yuan, JF; Chang, TY; Liu, P; Li, QM | Evaluating Social Performance of Construction Projects: An Empirical Study                                                          | Sustainability                                     | 2018 | 10.3390/su10072329                 |    |    | X  |

| Authors                                           | Article Title                                                                                                              | Source Title                                     | Year | DOI                             | C1 | C2 | C3 |
|---------------------------------------------------|----------------------------------------------------------------------------------------------------------------------------|--------------------------------------------------|------|---------------------------------|----|----|----|
| Xiang P., Huo X., Shen L.                         | Research on the phenomenon of asymmetric information in construction projects - The case of China                          | International journal of project management      | 2015 | 10.1016/j.ijproman.2014.10.007  |    |    | X  |
| Xiang, PC; Jia, FY; Li, XH                        | Critical Behavioral Risk Factors among Principal Participants in the Chinese Construction Industry                         | Sustainability                                   | 2018 | 10.3390/su10093158              |    |    | X  |
| Xie X., Wang Q., Shahrour I., Li J., Zhou B.      | A real-time interaction platform for settlement control during shield                                                      | Automation in construction                       | 2018 | 10.1016/j.autcon.2018.06.012    | X  |    | X  |
| Xie, HT; Zheng, JW; Zhang, YH; Li, HY             | Effects of Payment Delays at Two Links in Payment Chains on the Progress of Construction Projects: System Dynamic Modeling | Sustainability                                   | 2019 | 10.3390/su11154115              |    |    | X  |
| Xiong B., Newton S., Skitmore M.                  | Towards a conceptual model of the job performance of construction professionals: a person-environment fit perspective      | International journal of construction management | 2019 | 10.1080/15623599.2019.1695417   |    |    | X  |
| Xiong, CS; Beckmann, V; Tan, R                    | Effects of Infrastructure on Land Use and Land Cover Change (LUCC): The Case of Hangzhou International Airport, China      | Sustainability                                   | 2018 | 10.3390/su10062013              |    |    | X  |
| Xu J., Lu W., Ye M., Xue F., Zhang X., Lee B.F.P. | Is the private sector more efficient? Big data analytics of construction waste management sectoral                         | Resources, conservation and recycling            | 2020 | 10.1016/j.resconrec.2019.104674 |    | X  |    |

| Authors                                                      | Article Title                                                                                                                | Source Title                                       | Year | DOI                                | C1 | C2 | C3 |
|--------------------------------------------------------------|------------------------------------------------------------------------------------------------------------------------------|----------------------------------------------------|------|------------------------------------|----|----|----|
| Xu J., Wang Y., Yan C., Zhang L., Yin L., Zhang S., Zhang G. | Lifecycle health monitoring and assessment system of soft soil subgrade for expressways in China                             | Journal of cleaner production                      | 2019 | 10.1016/j.jclepro.2019.06.256      |    |    | X  |
| Xu J., Zhao S.                                               | Noncooperative Game-Based Equilibrium Strategy to Address the Conflict between a Construction Company and Selected Suppliers | Journal of construction engineering and management | 2017 | 10.1061/(ASCE)CO.1943-7862.0001329 |    |    | X  |
| Xu Q., Chong H.-Y., Liao P.-C.                               | Collaborative information integration for construction safety monitoring                                                     | Automation in construction                         | 2019 | 10.1016/j.autcon.2019.02.004       | X  |    | X  |
| Xu X., Wang J., Li C.Z., Huang W., Xia N.                    | Schedule risk analysis of infrastructure projects: A hybrid dynamic approach                                                 | Automation in construction                         | 2018 | 10.1016/j.autcon.2018.07.026       |    |    | X  |
| Xu, GY; Li, M; Chen, CH; Wei, YC                             | Cloud asset-enabled integrated IoT platform for lean prefabricated                                                           | Automation in construction                         | 2018 | 10.1016/j.autcon.2018.05.012       |    |    | X  |
| Xu, JP; Shi, Y; Xie, YC; Zhao, SW                            | A BIM-Based construction and demolition waste information management system for greenhouse gas quantification and reduction  | Journal of cleaner production                      | 2019 | 10.1016/j.jclepro.2019.04.158      |    |    | X  |
| Xu, KX; Shen, GQ; Liu, GW; Martek, I                         | Demolition of Existing Buildings in Urban Renewal Projects: A Decision Support System in the China Context                   | Sustainability                                     | 2019 | 10.3390/su11020491                 |    |    | X  |
| Xu, XX; Li, CZ; Wang, JY; Huang, WK                          | Collaboration between designers and contractors to improve building energy                                                   | Journal of cleaner production                      | 2019 | 10.1016/j.jclepro.2019.02.036      |    |    | X  |

| Authors                                                                 | Article Title                                                                                                                         | Source Title                                          | Year | DOI                            | C1 | C2 | C3 |
|-------------------------------------------------------------------------|---------------------------------------------------------------------------------------------------------------------------------------|-------------------------------------------------------|------|--------------------------------|----|----|----|
| Xue H., Zhang S., Su Y., Wu Z., Yang R.J.                               | Effect of stakeholder collaborative management on off-site construction cost performance                                              | Journal of cleaner production                         | 2018 | 10.1016/j.jclepro.2018.02.258  |    |    | X  |
| Xue, B; Liu, BS; Sun, T                                                 | What Matters in Achieving Infrastructure Sustainability through Project Management Practices: A Preliminary Study of Critical Factors | Sustainability                                        | 2018 | 10.3390/su10124421             |    |    | X  |
| Xue, H; Zhang, SJ; Su, YK; Wu, ZZ                                       | Capital Cost Optimization for Prefabrication: A Factor Analysis Evaluation Model                                                      | Sustainability                                        | 2018 | 10.3390/su10010159             |    |    | X  |
| Xue, H; Zhang, SJ; Su, YK; Wu, ZZ                                       | Factors Affecting the Capital Cost of Prefabrication-A Case Study of China                                                            | Sustainability                                        | 2017 | 10.3390/su9091512              |    |    | X  |
| Xue, J; Shen, GQ; Yang, RJ; Zafar, I; Ekanayake, EMAC; Lin, X; Darko, A | Influence of formal and informal stakeholder relationship on megaproject performance: a case of China                                 | Engineering construction and architectural management |      | 10.1108/ECAM-07-2019-0353      |    |    | X  |
| Xue, XL; Zhang, RX; Zhang, XL; Yang, RJ; Li, H                          | Environmental and social challenges for urban subway construction: An empirical study in China                                        | International journal of project management           | 2015 | 10.1016/j.ijproman.2014.09.003 |    |    | X  |
| Xue, YT; Xiang, PC                                                      | The Social Risk of High-Speed Rail Projects in China: A Bayesian Network                                                              | Sustainability                                        | 2020 | 10.3390/su12052087             |    |    | X  |
| Yamaura J., Muench S.T.                                                 | Assessing the impacts of mobile technology on public transportation project                                                           | Automation in construction                            | 2018 | 10.1016/j.autcon.2018.08.021   |    |    | X  |



| Authors                                                                                       | Article Title                                                                                                    | Source Title                                       | Year | DOI                                | C1 | C2 | C3 |
|-----------------------------------------------------------------------------------------------|------------------------------------------------------------------------------------------------------------------|----------------------------------------------------|------|------------------------------------|----|----|----|
| Yan L., Zhang L.                                                                              | Interplay of Contractual Governance and Trust in Improving Construction Project Performance: Dynamic Perspective | Journal of management in engineering               | 2020 | 10.1061/(ASCE)ME.1943-5479.0000791 |    |    | X  |
| Yan, HY; Elzarka, H; Gao, C; Zhang, FL; Tang, WB                                              | Critical Success Criteria for Programs in China: Construction Companies'                                         | Journal of management in engineering               | 2019 | 10.1061/(ASCE)ME.1943-5479.0000659 |    |    | X  |
| Yang D., He Q., Cui Q., Hsu S.-C.                                                             | Non-economic motivations for organizational citizenship behavior in construction megaprojects                    | International journal of project management        | 2020 | 10.1016/j.ijproman.2019.09.006     |    |    | X  |
| Yang D., He Q., Cui Q., Hsu S.-C.                                                             | Organizational Citizenship Behavior in Construction Megaprojects                                                 | Journal of management in engineering               | 2018 | 10.1061/(ASCE)ME.1943-5479.0000614 |    |    | X  |
| Yang F., Li X., Song Z., Li Y., Zhu Y.                                                        | Job Burnout of Construction Project Managers: Considering the Role of Organizational Justice                     | Journal of construction engineering and management | 2018 | 10.1061/(ASCE)CO.1943-7862.0001567 |    |    | X  |
| Yang F., Li X., Zhu Y., Li Y., Wu C.                                                          | Job burnout of construction project managers in China: A cross-sectional analysis                                | International journal of project management        | 2017 | 10.1016/j.ijproman.2017.06.005     |    |    | X  |
| Yang L.-R., Huang C.-F.                                                                       | Information platform to improve technological innovation capabilities: role of cloud platform                    | Journal of civil engineering and management        | 2016 | 10.3846/13923730.2014.929023       |    |    | X  |
| Yang R., Wakefield R., Lyu S., Jayasuriya S., Han F., Yi X., Yang X., Amarasinghe G., Chen S. | Public and private blockchain in construction business process and information integration                       | Automation in construction                         | 2020 | 10.1016/j.autcon.2020.103276       | X  |    | X  |

| Authors                                                                       | Article Title                                                                                                                           | Source Title                                          | Year | DOI                                | C1 | C2 | C3 |
|-------------------------------------------------------------------------------|-----------------------------------------------------------------------------------------------------------------------------------------|-------------------------------------------------------|------|------------------------------------|----|----|----|
| Yang R.J., Jayasuriya S., Gunarathna C., Arashpour M., Xue X., Zhang G.       | The evolution of stakeholder management practices in Australian mega construction projects                                              | Engineering construction and architectural management | 2018 | 10.1108/ECAM-07-2016-0168          |    |    | X  |
| Yang R.J., Shen G.Q.P.                                                        | Framework for stakeholder management in construction projects                                                                           | Journal of management in engineering                  | 2015 | 10.1061/(ASCE)ME.1943-5479.0000285 |    |    | X  |
| Yang X., Yu M., Zhu F.                                                        | Impact of Project Planning on Knowledge Integration in Construction Projects                                                            | Journal of construction engineering and management    | 2020 | 10.1061/(ASCE)CO.1943-7862.0001852 |    |    | X  |
| Yang Z., Yuan Y., Zhang M., Zhao X., Tian B.                                  | Assessment of Construction Workers' Labor Intensity Based on Wearable Smartphone System                                                 | Journal of construction engineering and management    | 2019 | 10.1061/(ASCE)CO.1943-7862.0001666 |    | X  | X  |
| Yang, CH; Lee, KC; Chen, HC                                                   | Incorporating carbon footprint with activity-based costing constraints into sustainable public transport infrastructure project         | Journal of cleaner production                         | 2016 | 10.1016/j.jclepro.2016.06.014      |    |    | X  |
| Yang, J; Yuan, M; Yigitcanlar, T; Newman, P; Schultmann, F                    | Managing Knowledge to Promote Sustainability in Australian Transport Infrastructure Projects                                            | Sustainability                                        | 2015 | 10.3390/su7078132                  |    |    | X  |
| Yang, L; Cheng, JCP; Wang, Q                                                  | Semi-automated generation of parametric BIM for steel structures based on terrestrial laser scanning data                               | Automation in construction                            | 2020 | 10.1016/j.autcon.2019.103037       |    | X  | X  |
| Yang, Q; Zhou, HW; Zhang, XY; Nielsen, CP; Li, JS; Lu, X; Yanga, HP; Chen, HP | Hybrid life-cycle assessment for energy consumption and greenhouse gas emissions of a typical biomass gasification power plant in China | Journal of cleaner production                         | 2018 | 10.1016/j.jclepro.2018.09.041      |    | X  |    |

| Authors                                                                | Article Title                                                                                                                     | Source Title                                       | Year | DOI                                | C1 | C2 | C3 |
|------------------------------------------------------------------------|-----------------------------------------------------------------------------------------------------------------------------------|----------------------------------------------------|------|------------------------------------|----|----|----|
| Yang, T; Long, RY; Cui, XT; Zhu, DD; Chen, H                           | Application of the public-private partnership model to urban sewage treatment                                                     | Journal of cleaner production                      | 2017 | 10.1016/j.jclepro.2016.04.152      |    |    | X  |
| Yang, T; Long, RY; Li, WB; Ur Rehman, S                                | Innovative Application of the Public-Private Partnership Model to the Electric Vehicle Charging Infrastructure in                 | Sustainability                                     | 2016 | 10.3390/su8080738                  |    |    | X  |
| Yang, YJ; Tang, WZ; Shen, WX; Wang, TF                                 | Enhancing Risk Management by Partnering in International EPC Projects: Perspective from Evolutionary Game in Chinese Construction | Sustainability                                     | 2019 | 10.3390/su11195332                 |    |    | X  |
| Yang, YS; Liu, DX; Xiao, H; Chen, JG; Ding, Y; Xia, D; Xia, ZY; Xu, WN | Evaluating the Effect of the Ecological Restoration of Quarry Slopes in Caidian District, Wuhan City                              | Sustainability                                     | 2019 | 10.3390/su11236624                 |    |    | X  |
| Yao, M; Wang, F; Chen, ZY; Ye, HR                                      | Optimal Incentive Contract with Asymmetric Cost                                                                                   | Journal of construction engineering and management | 2020 | 10.1061/(ASCE)CO.1943-7862.0001832 |    |    | X  |
| Yap J.B.H., Abdul-Rahman H., Chen W.                                   | Collaborative model: Managing design changes with reusable project experiences through project learning and effective             | International journal of project management        | 2017 | 10.1016/j.ijproman.2017.04.010     |    |    | X  |
| Yap J.B.H., Abdul-Rahman H., Wang C.                                   | Preventive Mitigation of Overruns with Project Communication Management and Continuous Learning: PLS-SEM Approach                 | Journal of construction engineering and management | 2018 | 10.1061/(ASCE)CO.1943-7862.0001456 |    |    | X  |
| Yap J.B.H., Chow I.N.                                                  | Investigating the managerial “nuts and bolts” for the construction industry                                                       | Built environment project and asset management     | 2020 | 10.1108/BEPAM-10-2019-0094         |    |    | X  |

| Authors                                                             | Article Title                                                                                                                         | Source Title                                          | Year | DOI                                | C1 | C2 | C3 |
|---------------------------------------------------------------------|---------------------------------------------------------------------------------------------------------------------------------------|-------------------------------------------------------|------|------------------------------------|----|----|----|
| Yap J.B.H., Chow I.N., Shavarebi K.                                 | Criticality of Construction Industry Problems in Developing Countries: Analyzing Malaysian                                            | Journal of management in engineering                  | 2019 | 10.1061/(ASCE)ME.1943-5479.0000709 |    |    | X  |
| Yap J.B.H., Leong W.J., Skitmore M.                                 | Capitalising teamwork for enhancing project delivery and management in construction: empirical study                                  | Engineering construction and architectural management | 2020 | 10.1108/ECAM-10-2019-0581          |    | X  | X  |
| Yap J.B.H., Rou Chong J., Skitmore M., Lee W.P.                     | Rework Causation that Undermines Safety Performance during Production in Construction                                                 | Journal of construction engineering and management    | 2020 | 10.1061/(ASCE)CO.1943-7862.0001902 |    |    | X  |
| Yap J.B.H., Shavarebi K.                                            | Enhancing project delivery performances in construction through experiential learning and personal constructs: competency development | International journal of construction management      | 2019 | 10.1080/15623599.2019.1629864      |    |    | X  |
| Yarmohammadi, S; Castro-Lacouture, D                                | Automated performance measurement for 3D building modeling decisions                                                                  | Automation in construction                            | 2018 | 10.1016/j.autcon.2018.05.011       |    |    | X  |
| Yaseen, ZM; Ali, ZH; Salih, SQ; Al-Ansari, N                        | Prediction of Risk Delay in Construction Projects Using a Hybrid Artificial Intelligence Model                                        | Sustainability                                        | 2020 | 10.3390/su12041514                 |    |    | X  |
| Yazdani M., Abdi M.R., Kumar N., Keshavarz-Ghorabae M., Chan F.T.S. | Improved Decision Model for Evaluating Risks in Construction Projects                                                                 | Journal of construction engineering and management    | 2019 | 10.1061/(ASCE)CO.1943-7862.0001640 |    |    | X  |
| Yazdani M., Wen Z., Liao H., Banaitis A., Turskis Z.                | A grey combined compromise solution (CoCoSo-G) method for supplier selection in                                                       | Journal of civil engineering and management           | 2019 | 10.3846/jcem.2019.11309            |    |    | X  |
| Ye G., Jin Z., Xia B., Skitmore M.                                  | Analyzing causes for reworks in construction projects in                                                                              | Journal of management in engineering                  | 2015 | 10.1061/(ASCE)ME.1943-5479.0000347 |    |    | X  |

| Authors                                        | Article Title                                                                                           | Source Title                                       | Year | DOI                                | C1 | C2 | C3 |
|------------------------------------------------|---------------------------------------------------------------------------------------------------------|----------------------------------------------------|------|------------------------------------|----|----|----|
| Yeganeh A.A., Azizi M., Falsafi R.             | Root Causes of Design-Construction Interface Problems in Iranian Design-Build Projects                  | Journal of construction engineering and management | 2019 | 10.1061/(ASCE)CO.1943-7862.0001727 |    |    | X  |
| Yeh H.-H., Hsieh T.-Y., Chen J.-H.             | Managing Complex Engineering Interfaces of Urban Mass Rapid Transit                                     | Journal of construction engineering and management | 2017 | 10.1061/(ASCE)CO.1943-7862.0001283 |    |    | X  |
| Yevu, SK; Yu, ATW; Tetteh, MO; Antwi-Afari, MF | Analytical methods for information technology benefits in the built environment: towards an             | International journal of construction management   |      | 10.1080/15623599.2020.1712514      |    |    | X  |
| Yi C., Lu M.                                   | A mixed-integer linear programming approach for temporary haul road design in rough-grading projects    | Automation in construction                         | 2016 | 10.1016/j.autcon.2016.08.022       |    | X  |    |
| Yi C.-Y., Gwak H.-S., Lee D. E.                | Stochastic carbon emission estimation method for construction operation                                 | Journal of civil engineering and management        | 2017 | 10.3846/13923730.2014.992466       |    |    | X  |
| Yi W., Chi H.-L., Wang S.                      | Mathematical programming models for construction site layout problems                                   | Automation in construction                         | 2018 | 10.1016/j.autcon.2017.10.031       |    |    | X  |
| Yi, D; Lee, EB; Ahn, J                         | Onshore Oil and Gas Design Schedule Management Process Through Time-Impact Simulations Analyses         | Sustainability                                     | 2019 | 10.3390/su11061613                 |    |    | X  |
| Yi, T; Zhang, C; Lin, TY; Liu, JP              | Research on the spatial-temporal distribution of electric vehicle charging load demand: A case study in | Journal of cleaner production                      | 2020 | 10.1016/j.jclepro.2019.118457      |    |    | X  |
| Yi, W; Chan, APC                               | Which Environmental Indicator Is Better Able to Predict the Effects of Heat Stress on Construction      | Journal of management in engineering               | 2015 | 10.1061/(ASCE)ME.1943-5479.0000284 |    |    | X  |

| Authors                                                                       | Article Title                                                                                                                                                  | Source Title                                             | Year | DOI                                | C1 | C2 | C3 |
|-------------------------------------------------------------------------------|----------------------------------------------------------------------------------------------------------------------------------------------------------------|----------------------------------------------------------|------|------------------------------------|----|----|----|
| Yirsaw, E; Wu, W; Shi, XP;<br>Temesgen, H; Bekele, B                          | Land Use/Land Cover<br>Change Modeling and the<br>Prediction of Subsequent<br>Changes in Ecosystem<br>Service Values in a Coastal<br>Area of China, the Su-Xi- | Sustainability                                           | 2017 | 10.3390/su9071204                  |    |    | X  |
| Yoon J., Yu I.                                                                | Estimating normal duration<br>of renovation for multistory<br>apartment building<br>considering extension-type<br>renovation projects                          | Journal of civil engineering<br>and management           | 2019 | 10.3846/jcem.2019.8024             |    |    | X  |
| Yoon Y., Tamer Z., Hastak<br>M.                                               | Protocol to enhance<br>profitability by managing<br>risks in construction projects                                                                             | Journal of management in<br>engineering                  | 2015 | 10.1061/(ASCE)ME.1943-5479.0000339 |    |    | X  |
| You J., Chen Y., Wang W.,<br>Shi C.                                           | Uncertainty, opportunistic<br>behavior, and governance in<br>construction projects: The<br>efficacy of contracts                                               | International journal of<br>project management           | 2018 | 10.1016/j.ijproman.2018.03.002     |    |    | X  |
| Younes B., Bouferguène A.,<br>Al-Hussein M., Yu H.                            | Overdue invoice<br>management: Markov chain                                                                                                                    | Journal of construction<br>engineering and management    | 2015 | 10.1061/(ASCE)CO.1943-7862.0000913 |    |    | X  |
| Yousefi V., Yakhchali S.H.,<br>Khanzadi M., Mehrabanfar<br>E., Šaparauskas J. | Proposing a neural network<br>model to predict time and<br>cost claims in construction                                                                         | Journal of civil engineering<br>and management           | 2016 | 10.3846/13923730.2016.1205510      |    |    | X  |
| Yu A.T.W., Javed A.A., Lam<br>T.I., Shen G.Q., Sun M.                         | Integrating value<br>management into sustainable<br>construction projects in Hong                                                                              | Engineering construction and<br>architectural management | 2018 | 10.1108/ECAM-03-2017-0049          |    |    | X  |
| Yu A.T.W., Shen G.Q.P.                                                        | Critical success factors of the<br>briefing process for<br>construction projects                                                                               | Journal of management in<br>engineering                  | 2015 | 10.1061/(ASCE)ME.1943-5479.0000242 |    | X  | X  |
| Yu J., Leung M.-Y.                                                            | Exploring factors of<br>preparing public engagement<br>for large-scale development<br>projects via a focus group                                               | International journal of<br>project management           | 2015 | 10.1016/j.ijproman.2015.01.015     |    |    | X  |

| Authors                                                        | Article Title                                                                                                                       | Source Title                                       | Year | DOI                                | C1 | C2 | C3 |
|----------------------------------------------------------------|-------------------------------------------------------------------------------------------------------------------------------------|----------------------------------------------------|------|------------------------------------|----|----|----|
| Yu J., Leung M.-Y.                                             | Structural Stakeholder Model in Public Engagement for Construction Development Projects                                             | Journal of construction engineering and management | 2018 | 10.1061/(ASCE)CO.1943-7862.0001462 |    |    | X  |
| Yu M.-C., Dang V.-L., Yeh H.-C.                                | Measuring cash flow and overdraft for fuzzy project networks with overlapping activities                                            | Journal of civil engineering and management        | 2017 | 10.3846/13923730.2016.1210215      |    |    | X  |
| Yu T., Liang X., Wang Y.                                       | Factors Affecting the Utilization of Big Data in Construction Projects                                                              | Journal of construction engineering and management | 2020 | 10.1061/(ASCE)CO.1943-7862.0001807 | X  |    | X  |
| Yu T., Man Q., Wang Y., Shen G.Q., Hong J., Zhang J., Zhong J. | Evaluating different stakeholder impacts on the occurrence of quality defects in offsite construction projects: A Bayesian-network- | Journal of cleaner production                      | 2019 | 10.1016/j.jclepro.2019.118390      |    |    | X  |
| Yu, HL; Ding, LY; Li, PH                                       | Two Typical Legends Automatic Recognition in Geological Section Map of Metro Project                                                | Journal of intelligent and robotic systems         | 2015 | 10.1007/s10846-014-0110-1          |    | X  |    |
| Yu, M; Zhu, FW; Yang, XT; Wang, LZ; Sun, XX                    | Integrating Sustainability into Construction Engineering Projects: Perspective of Sustainable Project Planning                      | Sustainability                                     | 2018 | 10.3390/su10030784                 |    |    | X  |
| Yu, T; Liang, X; Shen, GQ; Shi, Q; Wang, G                     | An optimization model for managing stakeholder conflicts in urban redevelopment projects in                                         | Journal of cleaner production                      | 2019 | 10.1016/j.jclepro.2018.12.071      |    |    | X  |
| Yu, T; Shen, GQP; Shi, Q; Lai, XD; Li, CZD; Xu, KX             | Managing social risks at the housing demolition stage of urban redevelopment projects: A stakeholder-oriented study using social    | International journal of project management        | 2017 | 10.1016/j.ijproman.2017.04.004     |    |    | X  |

| Authors                                                   | Article Title                                                                                                     | Source Title                                       | Year | DOI                                | C1 | C2 | C3 |
|-----------------------------------------------------------|-------------------------------------------------------------------------------------------------------------------|----------------------------------------------------|------|------------------------------------|----|----|----|
| Yu, WD; Cheng, ST; Ho, WC; Chang, YH                      | Measuring the Sustainability of Construction Projects throughout Their Lifecycle: A Taiwan Lesson                 | Sustainability                                     | 2018 | 10.3390/su10051523                 |    | X  | X  |
| Yuan C., McClure T., Cai H., Dunston P.S.                 | Life-Cycle Approach to Collecting, Managing, and Sharing Transportation Infrastructure Asset Data                 | Journal of construction engineering and management | 2017 | 10.1061/(ASCE)CO.1943-7862.0001288 |    |    | X  |
| Yuan H.                                                   | Barriers and countermeasures for managing construction and demolition waste: A case of Shenzhen in China          | Journal of cleaner production                      | 2017 | 10.1016/j.jclepro.2017.04.137      |    |    | X  |
| Yuan H., Wu H., Zuo J.                                    | Understanding Factors Influencing Project Managers' Behavioral Intentions to Reduce Waste                         | Journal of management in engineering               | 2018 | 10.1061/(ASCE)ME.1943-5479.0000642 |    |    | X  |
| Yuan J., Chen K., Li W., Ji C., Wang Z., Skibniewski M.J. | Social network analysis for social risks of construction projects in high-density urban areas in China            | Journal of cleaner production                      | 2018 | 10.1016/j.jclepro.2018.07.109      |    |    | X  |
| Yuan J., Li Y., Luo X., Zhang Z., Ruan Y., Zhou Q.        | A new hybrid multi-criteria decision-making approach for developing integrated energy systems in industrial parks | Journal of cleaner production                      | 2020 | 10.1016/j.jclepro.2020.122119      |    | X  |    |
| Yuan J., Xu W., Xia B., Skibniewski M.J.                  | Exploring Key Indicators of Residual Value Risks in China's Public-Private Partnership Projects                   | Journal of management in engineering               | 2018 | 10.1061/(ASCE)ME.1943-5479.0000561 |    |    | X  |
| Yuan L., Guo J., Wang Q.                                  | Automatic classification of common building materials from 3D terrestrial laser scan                              | Automation in construction                         | 2020 | 10.1016/j.autcon.2019.103017       |    |    | X  |



| Authors                                                                | Article Title                                                                                                                      | Source Title                                | Year | DOI                            | C1 | C2 | C3 |
|------------------------------------------------------------------------|------------------------------------------------------------------------------------------------------------------------------------|---------------------------------------------|------|--------------------------------|----|----|----|
| Yuan, HP; Yang, Y; Xue, XL                                             | Promoting Owners' BIM Adoption Behaviors to Achieve Sustainable Project Management                                                 | Sustainability                              | 2019 | 10.3390/su11143905             |    |    | X  |
| Yuan, JF; Li, XW; Xiahou, XE; Tymvios, N; Zhou, ZP; Li, QM             | Accident prevention through design (PtD): Integration of building information modeling and PtD knowledge                           | Automation in construction                  | 2019 | 10.1016/j.autcon.2019.02.015   |    |    | X  |
| Yuan, ZM; Ni, GD; Wang, LX; Qiao, YN; Sun, CS; Xu, N; Wang, WS         | Research on the Barrier Analysis and Strength Measurement of a Prefabricated Building                                              | Sustainability                              | 2020 | 10.3390/su12072994             |    |    | X  |
| Yun S., Choi J., de Oliveira D.P., Mulva S.P.                          | Development of performance metrics for phase-based capital project benchmarking                                                    | International journal of project management | 2016 | 10.1016/j.ijproman.2015.12.004 |    |    | X  |
| Yun S., Choi J., Oliveira D.P., Mulva S.P., Kang Y.                    | Measuring project management inputs throughout capital project                                                                     | International journal of project management | 2016 | 10.1016/j.ijproman.2016.06.004 |    |    | X  |
| Yun, S; Jung, W                                                        | Benchmarking Sustainability Practices Use throughout Industrial Construction Project Delivery                                      | Sustainability                              | 2017 | 10.3390/su9061007              |    | X  | X  |
| Yusof N., Zainul Abidin N., Zailani S.H.M., Govindan K., Iranmanesh M. | Linking the environmental practice of construction firms and the environmental behaviour of practitioners in construction projects | Journal of cleaner production               | 2016 | 10.1016/j.jclepro.2016.01.090  |    |    | X  |
| Yusof, N; Awang, H; Iranmanesh, M                                      | Determinants and outcomes of environmental practices in Malaysian construction                                                     | Journal of cleaner production               | 2017 | 10.1016/j.jclepro.2017.04.064  |    |    | X  |

| Authors                                                      | Article Title                                                                                                                                                                                                | Source Title                                             | Year | DOI                                | C1 | C2 | C3 |
|--------------------------------------------------------------|--------------------------------------------------------------------------------------------------------------------------------------------------------------------------------------------------------------|----------------------------------------------------------|------|------------------------------------|----|----|----|
| Zaeri F., Rotimi J.O.B.,<br>Hosseini M.R., Cox J.            | Implementation of the LPS<br>using an excel spreadsheet: A<br>case study from the New<br>Zealand construction industry                                                                                       | Construction innovation                                  | 2017 | 10.1108/CI-01-2016-0002            |    | X  |    |
| Zahidy, AA; Sorooshian, S;<br>Abd Hamid, Z                   | Critical Success Factors for<br>Corporate Social<br>Responsibility Adoption in<br>the Construction Industry in                                                                                               | Sustainability                                           | 2019 | 10.3390/su11226411                 |    |    | X  |
| Zahoor H., Chan A.P.C.,<br>Utama W.P., Gao R., Memon<br>S.A. | Determinants of Safety<br>Climate for Building<br>Projects: SEM-Based Cross-                                                                                                                                 | Journal of construction<br>engineering and management    | 2017 | 10.1061/(ASCE)CO.1943-7862.0001298 |    |    | X  |
| Zaman U.                                                     | Examining the effect of<br>xenophobia on<br>“transnational” mega<br>construction project (MCP)<br>success: Moderating role of<br>transformational leadership<br>and high-performance work<br>(HPW) practices | Engineering construction and<br>architectural management | 2020 | 10.1108/ECAM-05-2019-0227          |    |    | X  |
| Zaman, U; Jabbar, Z; Nawaz,<br>S; Abbas, M                   | Understanding the soft side<br>of software projects: An<br>empirical study on the<br>interactive effects of social<br>skills and political skills on<br>complexity - performance                             | International journal of<br>project management           | 2019 | 10.1016/j.ijproman.2019.01.015     |    |    | X  |
| Zedan, S; Miller, W                                          | Quantifying stakeholders'<br>influence on energy<br>efficiency of housing:<br>development and application<br>of a four-step methodology                                                                      | Construction management<br>and economics                 | 2018 | 10.1080/01446193.2017.1411599      |    |    | X  |

| Authors                                                                                                       | Article Title                                                                                                                                            | Source Title                                       | Year | DOI                                | C1 | C2 | C3 |
|---------------------------------------------------------------------------------------------------------------|----------------------------------------------------------------------------------------------------------------------------------------------------------|----------------------------------------------------|------|------------------------------------|----|----|----|
| Zekavat, PR; Moon, S; Bernold, LE                                                                             | Holonic Construction Management: Unified Framework for ICT-Supported Process Control                                                                     | Journal of management in engineering               | 2015 | 10.1061/(ASCE)ME.1943-5479.0000316 | X  |    | X  |
| Zeng, NS; Liu, Y; Mao, C; Konig, M                                                                            | Investigating the Relationship between Construction Supply Chain Integration and Sustainable Use of Material: Evidence from China                        | Sustainability                                     | 2018 | 10.3390/su10103581                 |    |    | X  |
| Zeng, SX; Ma, HY; Lin, H; Zeng, RC; Tam, VWY                                                                  | Social responsibility of major infrastructure projects in                                                                                                | International journal of project management        | 2015 | 10.1016/j.ijproman.2014.07.007     |    |    | X  |
| Zha X., Ma J., Lu X.                                                                                          | Performance of a coupling device combined energy-efficient rotating biological contactors with anoxic filter for low-strength rural wastewater treatment | Journal of cleaner production                      | 2018 | 10.1016/j.jclepro.2018.06.138      |    |    | X  |
| Zhan C., de Jong M.                                                                                           | Financing eco cities and low carbon cities: The case of Shenzhen International Low Carbon City                                                           | Journal of cleaner production                      | 2018 | 10.1016/j.jclepro.2018.01.097      |    |    | X  |
| Zhan W., Pan W.                                                                                               | Formulating Systemic Construction Productivity Enhancement Strategies                                                                                    | Journal of construction engineering and management | 2020 | 10.1061/(ASCE)CO.1943-7862.0001886 |    | X  | X  |
| Zhang C., Hu M., Yang X., Miranda-Xicotencatl B., Sprecher B., Di Maio F., Zhong X., Tukker A.                | Upgrading construction and demolition waste management from downcycling to recycling in                                                                  | Journal of cleaner production                      | 2020 | 10.1016/j.jclepro.2020.121718      |    |    | X  |
| Zhang C., Tang P., Cooke N., Buchanan V., Yilmaz A., St. Germain S.W., Boring R.L., Akca-Hobbins S., Gupta A. | Human-centered automation for resilient nuclear power plant outage control                                                                               | Automation in construction                         | 2017 | 10.1016/j.autcon.2017.05.001       |    | X  | X  |

| Authors                                                       | Article Title                                                                                                                                | Source Title                                          | Year | DOI                                | C1 | C2 | C3 |
|---------------------------------------------------------------|----------------------------------------------------------------------------------------------------------------------------------------------|-------------------------------------------------------|------|------------------------------------|----|----|----|
| Zhang J., El-Gohary N.M.                                      | Integrating semantic NLP and logic reasoning into a unified system for fully-automated code checking                                         | Automation in construction                            | 2017 | 10.1016/j.autcon.2016.08.027       |    | X  | X  |
| Zhang J., El-Gohary N.M.                                      | Semantic NLP-Based Information Extraction from Construction Regulatory Documents for Automated Compliance Checking                           | Journal of computing in civil engineering             | 2016 | 10.1061/(ASCE)CP.1943-5487.0000346 |    | X  |    |
| Zhang J., El-Gohary N.M.                                      | Semantic-based logic representation and reasoning for automated regulatory compliance checking                                               | Journal of computing in civil engineering             | 2016 | 10.1061/(ASCE)CP.1943-5487.0000583 |    | X  |    |
| Zhang J., Ouyang Y., Li H., Ballesteros-Pérez P., Skitmore M. | Simulation analysis of incentives on employees' acceptance of foreign joint venture management practices: a case study                       | Engineering construction and architectural management | 2020 | 10.1108/ECAM-06-2019-0321          |    |    | X  |
| Zhang J., Xie H., Li H.                                       | Improvement of students problem-solving skills through project execution planning in civil engineering and construction management education | Engineering construction and architectural management | 2019 | 10.1108/ECAM-08-2018-0321          | X  |    | X  |
| Zhang L., Cao T., Wang Y.                                     | The mediation role of leadership styles in integrated project collaboration: An emotional intelligence                                       | International journal of project management           | 2018 | 10.1016/j.ijproman.2017.08.014     |    |    | X  |
| Zhang L., Chen X., Suo Y.                                     | Interrelationships among critical factors of work flow reliability in lean                                                                   | Journal of civil engineering and management           | 2017 | 10.3846/13923730.2016.1217921      |    |    | X  |

| Authors                                           | Article Title                                                                                                                   | Source Title                                          | Year | DOI                                | C1 | C2 | C3 |
|---------------------------------------------------|---------------------------------------------------------------------------------------------------------------------------------|-------------------------------------------------------|------|------------------------------------|----|----|----|
| Zhang L., He J.                                   | Critical Factors Affecting Tacit-Knowledge Sharing within the Integrated Project                                                | Journal of management in engineering                  | 2016 | 10.1061/(ASCE)ME.1943-5479.0000402 |    |    | X  |
| Zhang L., Li X.                                   | How to reduce the negative impacts of knowledge heterogeneity in engineering design team: Exploring the role of knowledge reuse | International journal of project management           | 2016 | 10.1016/j.ijproman.2016.05.009     |    |    | X  |
| Zhang L., Liu Q., Wu X., Skibniewski M.J.         | Perceiving interactions on construction safety behaviors: Workers' perspective                                                  | Journal of management in engineering                  | 2016 | 10.1061/(ASCE)ME.1943-5479.0000454 |    |    | X  |
| Zhang L., Wu X., Ding L., Skibniewski M.J., Lu Y. | Bim-Based Risk Identification System in                                                                                         | Journal of civil engineering and management           | 2016 | 10.3846/13923730.2015.1023348      |    |    | X  |
| Zhang Q., Yang S., Liao P.-C., Chen W.            | Influence Mechanisms of Factors on Project Management Capability                                                                | Journal of management in engineering                  | 2020 | 10.1061/(ASCE)ME.1943-5479.0000812 |    |    | X  |
| Zhang Q.-W., Chong H.-Y., Liao P.-C., Wan Y.-L.   | Logistic regression modeling of implementation of corporate safety policy in international infrastructures                      | Engineering construction and architectural management | 2020 | 10.1108/ECAM-03-2019-0155          |    |    | X  |
| Zhang R., Xing J., Ye K., Lu W., Shan Y.          | Synchronicity of global construction cost indexes                                                                               | Engineering construction and architectural management | 2019 | 10.1108/ECAM-02-2018-0045          |    |    | X  |
| Zhang R.P., Lingard H., Nevin S.                  | Development and validation of a multilevel safety climate measurement tool in the construction industry                         | Construction management and economics                 | 2015 | 10.1080/01446193.2015.1108451      |    |    | X  |
| Zhang R.P., Pirzadeh P., Lingard H., Nevin S.     | Safety climate as a relative concept: Exploring variability and change in a dynamic construction project environment            | Engineering construction and architectural management | 2018 | 10.1108/ECAM-09-2016-0207          |    |    | X  |

| Authors                                                 | Article Title                                                                                                                                  | Source Title                                          | Year | DOI                                | C1 | C2 | C3 |
|---------------------------------------------------------|------------------------------------------------------------------------------------------------------------------------------------------------|-------------------------------------------------------|------|------------------------------------|----|----|----|
| Zhang S., Bogus S.M.,<br>Lippitt C.D., Migliaccio G.C.  | Estimating Location-<br>Adjustment Factors for<br>Conceptual Cost Estimating<br>Based on Nighttime Light                                       | Journal of construction<br>engineering and management | 2017 | 10.1061/(ASCE)CO.1943-7862.0001216 |    |    | X  |
| Zhang S., Boukamp F.,<br>Teizer J.                      | Ontology-based semantic<br>modeling of construction<br>safety knowledge: Towards<br>automated safety planning for<br>job hazard analysis (JHA) | Automation in construction                            | 2015 | 10.1016/j.autcon.2015.02.005       | X  |    | X  |
| Zhang S., Fu Y., Kang F.                                | How to foster contractors'<br>cooperative behavior in the<br>Chinese construction<br>industry: Direct and<br>interaction effects of power      | International journal of<br>project management        | 2018 | 10.1016/j.ijproman.2018.05.004     |    |    | X  |
| Zhang S., Hou D., Wang C.,<br>Pan F., Yan L.            | Integrating and managing<br>BIM in 3D web-based GIS<br>for hydraulic and hydropower<br>engineering projects                                    | Automation in construction                            | 2020 | 10.1016/j.autcon.2020.103114       |    |    | X  |
| Zhang S., Pan F., Wang C.,<br>Sun Y., Wang H.           | BIM-Based Collaboration<br>Platform for the Management<br>of EPC Projects in<br>Hydropower Engineering                                         | Journal of construction<br>engineering and management | 2017 | 10.1061/(ASCE)CO.1943-7862.0001403 |    |    | X  |
| Zhang S., Shang C., Wang C.,<br>Song R., Wang X.        | Real-Time Safety Risk<br>Identification Model during<br>Metro Construction Adjacent<br>to Buildings                                            | Journal of construction<br>engineering and management | 2019 | 10.1061/(ASCE)CO.1943-7862.0001657 |    |    | X  |
| Zhang S., Teizer J.,<br>Pradhananga N., Eastman<br>C.M. | Workforce location tracking<br>to model, visualize and<br>analyze workspace<br>requirements in building<br>information models for              | Automation in construction                            | 2015 | 10.1016/j.autcon.2015.09.009       |    |    | X  |

| Authors                                                                        | Article Title                                                                                           | Source Title                                       | Year | DOI                                | C1 | C2 | C3 |
|--------------------------------------------------------------------------------|---------------------------------------------------------------------------------------------------------|----------------------------------------------------|------|------------------------------------|----|----|----|
| Zhang W., Zhang X., Luo X., Zhao T.                                            | Reliability model and critical factors identification of construction safety management based on system | Journal of civil engineering and management        | 2019 | 10.3846/jcem.2019.8652             |    |    | X  |
| Zhang X., Azhar S., Nadeem A., Khalfan M.                                      | Using Building Information Modelling to achieve Lean principles by improving efficiency of work teams   | International journal of construction management   | 2018 | 10.1080/15623599.2017.1382083      | X  |    |    |
| Zhang X., Bao H., Wang H., Skitmore M.                                         | A model for determining the optimal project life span and concession period of BOT projects             | International journal of project management        | 2016 | 10.1016/j.ijproman.2016.01.005     |    |    | X  |
| Zhang X., Wu Y., Shen L.                                                       | Embedding "green" in project-based organizations: The way ahead in the construction industry?           | Journal of cleaner production                      | 2015 | 10.1016/j.jclepro.2014.10.024      |    |    | X  |
| Zhang X., Wu Z., Feng Y., Xu P.                                                | "Turning green into gold": A framework for energy performance contracting (EPC) in China's real estate  | Journal of cleaner production                      | 2015 | 10.1016/j.jclepro.2014.09.037      |    |    | X  |
| Zhang Y., Javanmardi A., Liu Y., Yang S., Yu X., Hsiang S.M., Jiang Z., Liu M. | How Does Experience with Delay Shape Managers' Making-Do Decision: Random Forest Approach               | Journal of management in engineering               | 2020 | 10.1061/(ASCE)ME.1943-5479.0000776 | X  |    | X  |
| Zhang Y., Luo H., Skitmore M., Li Q., Zhong B.                                 | Optimal Camera Placement for Monitoring Safety in Metro Station Construction                            | Journal of construction engineering and management | 2018 | 10.1061/(ASCE)CO.1943-7862.0001584 |    |    | X  |
| Zhang, B; Le, Y; Xia, B; Skitmore, M                                           | Causes of Business-to-Government Corruption in the Tendering Process in                                 | Journal of management in engineering               | 2017 | 10.1061/(ASCE)ME.1943-5479.0000479 |    |    | X  |

| Authors                                                   | Article Title                                                                                                                                        | Source Title                                          | Year | DOI                                | C1 | C2 | C3 |
|-----------------------------------------------------------|------------------------------------------------------------------------------------------------------------------------------------------------------|-------------------------------------------------------|------|------------------------------------|----|----|----|
| Zhang, DX; Zhang, JY; Guo, JN; Xiong, HM                  | A Semantic and Social Approach for Real-Time Green Building Rating in BIM-Based Design                                                               | Sustainability                                        | 2019 | 10.3390/su11143973                 | X  |    |    |
| Zhang, H; Chi, S; Yang, J; Nepal, M; Moon, S              | Development of a Safety Inspection Framework on Construction Sites Using Mobile Computing                                                            | Journal of management in engineering                  | 2017 | 10.1061/(ASCE)ME.1943-5479.0000495 |    |    | X  |
| Zhang, JH; Gu, F; Zhang, YQ                               | Use of building-related construction and demolition wastes in highway embankment: Laboratory and                                                     | Journal of cleaner production                         | 2019 | 10.1016/j.jclepro.2019.05.182      |    |    | X  |
| Zhang, JP; Liu, Q; Hu, ZZ; Lin, JR; Yu, FQ                | A multi-server information-sharing environment for cross-party collaboration on a private cloud                                                      | Automation in construction                            | 2017 | 10.1016/j.autcon.2017.06.021       |    |    | X  |
| Zhang, JX; Li, H; Golizadeh, H; Zhao, CD; Lyu, S; Jin, RY | Reliability evaluation index for the integrated supply chain utilising BIM and lean approaches                                                       | Engineering construction and architectural management | 2020 | 10.1108/ECAM-12-2018-0542          |    |    | X  |
| Zhang, JX; Li, H; Wang, SHM                               | Analysis and Potential Application of the Maturity of Growth Management in the Developing Construction Industry of a Province of China: A Case Study | Sustainability                                        | 2017 | 10.3390/su9010143                  |    |    | X  |
| Zhang, JX; Xie, HY; Li, H                                 | Positioning and Priorities of Growth Management in Construction Industrialization: Chinese Firm-Level Empirical                                      | Sustainability                                        | 2017 | 10.3390/su9071105                  |    | X  | X  |



| Authors                                                         | Article Title                                                                                                                  | Source Title                                          | Year | DOI                                | C1 | C2 | C3 |
|-----------------------------------------------------------------|--------------------------------------------------------------------------------------------------------------------------------|-------------------------------------------------------|------|------------------------------------|----|----|----|
| Zhang, JX; Xie, HY; Li, H; Timothy, R; Pu, S; Deng, QX; Jin, WX | Integrated Framework of Growth Management for Identification of Service Innovation Levels and                                  | Sustainability                                        | 2018 | 10.3390/su10093319                 |    | X  | X  |
| Zhang, L; Chu, ZW; He, Q; Zhai, PP                              | Investigating the Constraints to Buidling Information Modeling (BIM) Applications for Sustainable Building Projects: A Case of | Sustainability                                        | 2019 | 10.3390/su11071896                 |    |    | X  |
| Zhang, L; El-Gohary, NM                                         | Discovering Stakeholder Values for Axiology-Based Value Analysis of Building                                                   | Journal of construction engineering and management    | 2016 | 10.1061/(ASCE)CO.1943-7862.0001004 |    |    | X  |
| Zhang, L; Sun, XJ; Xue, H                                       | Identifying critical risks in Sponge City PPP projects using DEMATEL method: A case study of China                             | Journal of cleaner production                         | 2019 | 10.1016/j.jclepro.2019.04.067      |    |    | X  |
| Zhang, L; Yuan, JF; Xia, NN; Bouferguene, A; Al-Hussein, M      | Improving Information Sharing in Major Construction Projects through OC and POC: RDT                                           | Journal of construction engineering and management    | 2020 | 10.1061/(ASCE)CO.1943-7862.0001847 |    |    | X  |
| Zhang, LH; Fenn, P; Fu, YC                                      | To insist or to concede? Contractors' behavioural strategies when handling disputed claims                                     | Engineering construction and architectural management | 2019 | 10.1108/ECAM-05-2018-0219          |    |    | X  |
| Zhang, LW; Sojobi, AO; Kodur, VKR; Liew, KM                     | Effective utilization and recycling of mixed recycled aggregates for a greener environment                                     | Journal of cleaner production                         | 2019 | 10.1016/j.jclepro.2019.07.075      |    |    | X  |
| Zhang, LY; Cheng, JJ; Fan, WJ                                   | Party Selection for Integrated Project Delivery Based on Interorganizational Transactive Memory System                         | Journal of construction engineering and management    | 2016 | 10.1061/(ASCE)CO.1943-7862.0001068 |    |    | X  |

| Authors                                                                  | Article Title                                                                                                                                                    | Source Title                                       | Year | DOI                                | C1 | C2 | C3 |
|--------------------------------------------------------------------------|------------------------------------------------------------------------------------------------------------------------------------------------------------------|----------------------------------------------------|------|------------------------------------|----|----|----|
| Zhang, PY; Li, N; Fang, DP; Wu, HJ                                       | Supervisor-Focused Behavior-Based Safety Method for the Construction Industry: Case Study in Hong Kong                                                           | Journal of construction engineering and management | 2017 | 10.1061/(ASCE)CO.1943-7862.0001294 |    |    | X  |
| Zhang, PY; Li, N; Jiang, ZM; Fang, DP; Anumba, CJ                        | An agent-based modeling approach for understanding the effect of worker-management interactions on construction workers' safety-related behaviors                | Automation in construction                         | 2019 | 10.1016/j.autcon.2018.10.015       |    |    | X  |
| Zhang, QZ; Tang, WZ; Liu, J; Duffiel, CF; Hui, FKP; Zhang, LH; Zhang, XT | Improving Design Performance by Alliance between Contractors and Designers in International Hydropower EPC Projects from the Perspective of Chinese Construction | Sustainability                                     | 2018 | 10.3390/su10041171                 |    |    | X  |
| Zhang, Y                                                                 | Construction of Bid Evaluation Index System in Government Public Project Green Procurement in China Based on D-S Evidence                                        | Sustainability                                     | 2020 | 10.3390/su12020651                 |    |    | X  |
| Zhang, YX; Fan, JW; Wang, SZ                                             | Assessment of Ecological Carrying Capacity and Ecological Security in China's Typical Eco-                                                                       | Sustainability                                     | 2020 | 10.3390/su12093923                 |    |    | X  |
| Zhao D., McCoy A., Kleiner B., Feng Y.                                   | Integrating safety culture into OSH risk mitigation: a pilot study on the electrical safety                                                                      | Journal of civil engineering and management        | 2016 | 10.3846/13923730.2014.914099       |    |    | X  |
| Zhao D., Thakur N., Chen J.                                              | Optimal Design of Energy Storage System to Buffer Charging Infrastructure in Smart Cities                                                                        | Journal of management in engineering               | 2020 | 10.1061/(ASCE)ME.1943-5479.0000742 |    | X  | X  |

| Authors                                                           | Article Title                                                                                                                         | Source Title                                             | Year | DOI                                | C1 | C2 | C3 |
|-------------------------------------------------------------------|---------------------------------------------------------------------------------------------------------------------------------------|----------------------------------------------------------|------|------------------------------------|----|----|----|
| Zhao J., Seppänen O.,<br>Peltokorpi A., Badihi B.,<br>Olivieri H. | Real-time resource tracking<br>for analyzing value-adding<br>time in construction                                                     | Automation in construction                               | 2019 | 10.1016/j.autcon.2019.04.003       |    |    | X  |
| Zhao N., Kam C., Lo J.T.Y.,<br>Kim J.I., Fischer M.               | Construction Parts in<br>Building Projects: Definition<br>and Case Study                                                              | Journal of management in<br>engineering                  | 2018 | 10.1061/(ASCE)ME.1943-5479.0000616 |    |    | X  |
| Zhao X., Hwang B.-G., Gao<br>Y.                                   | A fuzzy synthetic evaluation<br>approach for risk assessment:<br>A case of Singapore's green<br>projects                              | Journal of cleaner production                            | 2016 | 10.1016/j.jclepro.2015.11.042      |    |    | X  |
| Zhao X., Hwang B.-G., Lim<br>J.                                   | Job Satisfaction of Project<br>Managers in Green<br>Construction Projects:<br>Constituents, Barriers, and<br>Improvement Strategies   | Journal of cleaner production                            | 2020 | 10.1016/j.jclepro.2019.118968      |    |    | X  |
| Zhao Z.-Y., Zhao X.-J., Zuo<br>J., Zillante G.                    | Corporate social<br>responsibility for<br>construction contractors: a                                                                 | Journal of engineering design<br>and technology          | 2016 | 10.1108/JEDT-07-2014-0043          |    | X  |    |
| Zhao Z.-Y., Zuo J., Zillante<br>G.                                | Transformation of water<br>resource management: a case<br>study of the South-to-North<br>Water Diversion project                      | Journal of cleaner production                            | 2017 | 10.1016/j.jclepro.2015.08.066      |    | X  | X  |
| Zhao, HR; Li, NN                                                  | Risk Evaluation of a UHV<br>Power Transmission<br>Construction Project Based<br>on a Cloud Model and FCE<br>Method for Sustainability | Sustainability                                           | 2015 | 10.3390/su7032885                  |    |    | X  |
| Zhao, XB; Hwang, BG; Low,<br>SP                                   | An enterprise risk<br>management knowledge-<br>based decision support<br>system for construction firms                                | Engineering construction and<br>architectural management | 2016 | 10.1108/ECAM-03-2015-0042          |    |    | X  |

| Authors                                        | Article Title                                                                                          | Source Title                                          | Year | DOI                                | C1 | C2 | C3 |
|------------------------------------------------|--------------------------------------------------------------------------------------------------------|-------------------------------------------------------|------|------------------------------------|----|----|----|
| Zhao, XB; Hwang, BG; Low, SP                   | Enterprise risk management in international construction firms: drivers and hindrances                 | Engineering construction and architectural management | 2015 | 10.1108/ECAM-09-2014-0117          |    |    | X  |
| Zhao, XB; Hwang, BG; Low, SP; Wu, P            | Reducing Hindrances to Enterprise Risk Management Implementation in Construction Firms                 | Journal of construction engineering and management    | 2015 | 10.1061/(ASCE)CO.1943-7862.0000945 |    |    | X  |
| Zhao, XB; Wu, P; Wang, XY                      | Risk paths in BIM adoption: empirical study of China                                                   | Engineering construction and architectural management | 2018 | 10.1108/ECAM-08-2017-0169          |    |    | X  |
| Zhao, ZL; Zhang, LH; Yang, M; Chai, JX; Li, SR | Pricing for private charging pile sharing considering EV consumers based on non-cooperative game model | Journal of cleaner production                         | 2020 | 10.1016/j.jclepro.2020.120039      |    |    | X  |
| Zheng J., Wen Q., Qiang M.                     | Understanding Demand for Project Manager Competences in the Construction Industry: Data                | Journal of construction engineering and management    | 2020 | 10.1061/(ASCE)CO.1943-7862.0001865 |    |    | X  |
| Zheng L., Lu W., Chen K., Chau K.W., Niu Y.    | Benefit sharing for BIM implementation: Tackling the moral hazard dilemma in inter-firm cooperation    | International journal of project management           | 2017 | 10.1016/j.ijproman.2017.01.006     |    |    | X  |
| Zheng X., Easa S.M., Yang Z., Ji T., Jiang Z.  | Life-cycle sustainability assessment of pavement maintenance alternatives: Methodology and case study  | Journal of cleaner production                         | 2019 | 10.1016/j.jclepro.2018.12.227      |    |    | X  |
| Zheng X., Le Y., Chan A.P.C., Hu Y., Li Y.     | Review of the application of social network analysis (SNA) in construction project management research | International journal of project management           | 2016 | 10.1016/j.ijproman.2016.06.005     |    |    | X  |

| Authors                                                             | Article Title                                                                                                                    | Source Title                                       | Year | DOI                                | C1 | C2 | C3 |
|---------------------------------------------------------------------|----------------------------------------------------------------------------------------------------------------------------------|----------------------------------------------------|------|------------------------------------|----|----|----|
| Zheng, JW; Wu, GD; Xie, HT                                          | Impacts of Leadership on Project-Based Organizational Innovation Performance: The Mediator of Knowledge Sharing and Moderator of | Sustainability                                     | 2017 | 10.3390/su9101893                  |    |    | X  |
| Zheng, JW; Wu, GD; Xie, HT; Xu, H                                   | Ambidextrous Leadership and Sustainability-Based Project Performance: The Role of Project Culture                                | Sustainability                                     | 2017 | 10.3390/su9122336                  |    |    | X  |
| Zheng, L; Chen, JG; Zhao, MY; Cheng, SK; Wang, LP; Mang, HP; Li, ZF | What Could China Give to and Take from Other Countries in Terms of the Development of the Biogas                                 | Sustainability                                     | 2020 | 10.3390/su12041490                 |    |    | X  |
| Zheng, X; Lu, YJ; Le, Y; Li, YK; Fang, J                            | Formation of Interorganizational Relational Behavior in Megaprojects: Perspective of the Extended Theory of Planned Behavior     | Journal of management in engineering               | 2018 | 10.1061/(ASCE)ME.1943-5479.0000560 |    |    | X  |
| Zheng, X; Lu, YJ; Li, YK; Le, Y; Xiao, JZ                           | Quantifying and visualizing value exchanges in building information modeling (BIM) projects                                      | Automation in construction                         | 2019 | 10.1016/j.autcon.2018.12.001       |    |    | X  |
| Zhong B., Li H., Luo H., Zhou J., Fang W., Xing X.                  | Ontology-Based Semantic Modeling of Knowledge in Construction: Classification and Identification of Hazards Implied in Images    | Journal of construction engineering and management | 2020 | 10.1061/(ASCE)CO.1943-7862.0001767 |    |    | X  |
| Zhong B.T., Ding L.Y., Love P.E.D., Luo H.B.                        | An ontological approach for technical plan definition and verification in construction                                           | Automation in construction                         | 2015 | 10.1016/j.autcon.2015.02.002       |    |    | X  |

| Authors                                                                                    | Article Title                                                                                              | Source Title                                          | Year | DOI                                | C1 | C2 | C3 |
|--------------------------------------------------------------------------------------------|------------------------------------------------------------------------------------------------------------|-------------------------------------------------------|------|------------------------------------|----|----|----|
| Zhong, RY; Peng, Y; Xue, F; Fang, J; Zou, WW; Luo, H; Ng, ST; Lu, WS; Shen, GQP; Huang, GQ | Prefabricated construction enabled by the Internet-of-Things                                               | Automation in construction                            | 2017 | 10.1016/j.autcon.2017.01.006       |    |    | X  |
| Zhou C., Luo H., Fang W., Wei R., Ding L.                                                  | Cyber-physical-system-based safety monitoring for blind hoisting with the internet of things: A case study | Automation in construction                            | 2019 | 10.1016/j.autcon.2018.10.017       |    |    | X  |
| Zhou H., Zhao Y., Shen Q., Yang L., Cai H.                                                 | Risk assessment and management via multi-source information fusion for undersea tunnel construction        | Automation in construction                            | 2020 | 10.1016/j.autcon.2019.103050       |    |    | X  |
| Zhou H.W., Zhou Y.H., Zhao C.J.                                                            | Fault-Response Mechanism of Production System in Concrete-Dam-Construction                                 | Journal of construction engineering and management    | 2016 | 10.1061/(ASCE)CO.1943-7862.0001185 |    |    | X  |
| Zhou K., Luo X.-W., Li Q.-S.                                                               | Decision framework for optimal installation of outriggers in tall buildings                                | Automation in construction                            | 2018 | 10.1016/j.autcon.2018.05.017       |    |    | X  |
| Zhou P., El-Gohary N.                                                                      | Domain-specific hierarchical text classification for supporting automated environmental compliance         | Journal of computing in civil engineering             | 2016 | 10.1061/(ASCE)CP.1943-5487.0000513 |    | X  |    |
| Zhou Z., Irizarry J., Lu Y.                                                                | A Multidimensional Framework for Unmanned Aerial System Applications in Construction Project               | Journal of management in engineering                  | 2018 | 10.1061/(ASCE)ME.1943-5479.0000597 |    | X  | X  |
| Zhou, C; Xu, HC; Ding, LY; Wei, LC; Zhou, Y                                                | Dynamic prediction for attitude and position in shield tunneling: A deep learning                          | Automation in construction                            | 2019 | 10.1016/j.autcon.2019.102840       |    |    | X  |
| Zhou, SH; Ng, ST; Lee, SH; Xu, FJ; Yang, YF                                                | A domain knowledge incorporated text mining approach for capturing user needs on BIM applications          | Engineering construction and architectural management | 2019 | 10.1108/ECAM-02-2019-0097          | X  |    | X  |

| Authors                                           | Article Title                                                                                                          | Source Title                                | Year | DOI                                | C1 | C2 | C3 |
|---------------------------------------------------|------------------------------------------------------------------------------------------------------------------------|---------------------------------------------|------|------------------------------------|----|----|----|
| Zhou, XH; Shen, SL; Xu, YS; Zhou, AN              | Analysis of Production Safety in the Construction Industry of China in 2018                                            | Sustainability                              | 2019 | 10.3390/su11174537                 |    |    | X  |
| Zhou, Y; Ding, LY; Wang, XY; Truijens, M; Luo, HB | Applicability of 4D modeling for resource allocation in mega liquefied natural gas plant construction                  | Automation in construction                  | 2015 | 10.1016/j.autcon.2014.10.016       |    |    | X  |
| Zhou, YX; Cheung, CM; Hsu, SC                     | A dimensional model for describing and differentiating project teams                                                   | International journal of project management | 2017 | 10.1016/j.ijproman.2017.04.001     |    |    | X  |
| Zhou, ZP; Li, CZ; Mi, CM; Qian, LF                | Exploring the Potential Use of Near-Miss Information to Improve Construction Safety Performance                        | Sustainability                              | 2019 | 10.3390/su11051264                 |    |    | X  |
| Zhou, ZP; Mi, CM                                  | Social responsibility research within the context of megaproject management: Trends, gaps and                          | International journal of project management | 2017 | 10.1016/j.ijproman.2017.02.017     |    |    | X  |
| Zhu J., Mostafavi A.                              | Discovering complexity and emergent properties in project systems: A new approach to understanding project performance | International journal of project management | 2017 | 10.1016/j.ijproman.2016.10.004     |    |    | X  |
| Zhu L., Cheung S.O.                               | Harvesting Competitiveness through Building Organizational Innovation                                                  | Journal of management in engineering        | 2017 | 10.1061/(ASCE)ME.1943-5479.0000534 |    |    | X  |
| Zhu W., Zeng R., Li X., Zhu Y., Zhang Z.          | Managerial drivers of Chinese labour loyalty in international construction                                             | Journal of civil engineering and management | 2017 | 10.3846/13923730.2017.1381644      |    |    | X  |
| Zhu Z., Ren X., Chen Z.                           | Integrated detection and tracking of workforce and equipment from construction jobsite videos                          | Automation in construction                  | 2017 | 10.1016/j.autcon.2017.05.005       |    | X  | X  |

| Authors                                               | Article Title                                                                                                      | Source Title                                          | Year | DOI                           | C1 | C2 | C3 |
|-------------------------------------------------------|--------------------------------------------------------------------------------------------------------------------|-------------------------------------------------------|------|-------------------------------|----|----|----|
| Zhu, CX; Fan, X; Bai, ZK                              | Spatiotemporal Pattern of Wind Erosion on Unprotected Topsoil Replacement Sites in                                 | Sustainability                                        | 2020 | 10.3390/su12083237            |    |    | X  |
| Zhu, FW; Wang, LZ; Yu, M; Yang, XT                    | Quality of conflict management in construction project context                                                     | Engineering construction and architectural management | 2020 | 10.1108/ECAM-09-2019-0497     |    |    | X  |
| Zhu, JB; Fang, M; Shi, QQ; Wang, P; Li, Q             | Conceptualization, scale Contractor Cooperation Mechanism and Evolution of the Green Supply Chain in Mega Projects | Sustainability                                        | 2018 | 10.3390/su10114306            |    |    | X  |
| Zhu, JW; Zhou, LN; Li, L; Ali, W                      | Decision Simulation of Construction Project Delivery System under the Sustainable Construction Project Management  | Sustainability                                        | 2020 | 10.3390/su12062202            |    |    | X  |
| Zhu, X; Zhang, L; Ran, R; Mol, APJ                    | Regional restrictions on environmental impact assessment approval in China: the legitimacy of environmental        | Journal of cleaner production                         | 2015 | 10.1016/j.jclepro.2015.01.003 |    |    | X  |
| Zoghi, M; Kim, S                                      | Dynamic Modeling for Life Cycle Cost Analysis of BIM-Based Construction Waste Management                           | Sustainability                                        | 2020 | 10.3390/su12062483            |    |    | X  |
| Zohrehvandi S., Khalilzadeh M.                        | APRT-FMEA buffer sizing method in scheduling of a wind farm construction                                           | Engineering construction and architectural management | 2019 | 10.1108/ECAM-04-2018-0161     |    |    | X  |
| Zohrehvandi S., Khalilzadeh M., Amiri M., Shadrokh S. | A heuristic buffer sizing algorithm for implementing a renewable energy project                                    | Automation in construction                            | 2020 | 10.1016/j.autcon.2020.103267  |    |    | X  |



| Authors                                             | Article Title                                                                                                         | Source Title                                          | Year | DOI                                | C1 | C2 | C3 |
|-----------------------------------------------------|-----------------------------------------------------------------------------------------------------------------------|-------------------------------------------------------|------|------------------------------------|----|----|----|
| Zohrehvandi S., Vanhoucke M., Soltani R., Javadi M. | A reconfigurable model for implementation in the closing phase of a wind turbines project construction                | Engineering construction and architectural management | 2019 | 10.1108/ECAM-01-2019-0065          |    |    | X  |
| Zou Y., Kiviniemi A., Jones S.W.                    | Retrieving similar cases for construction project risk management using Natural Language Processing techniques        | Automation in construction                            | 2017 | 10.1016/j.autcon.2017.04.003       |    |    | X  |
| Zou Y., Kiviniemi A., Jones S.W.                    | Developing a tailored RBS linking to BIM for risk management of bridge                                                | Engineering construction and architectural management | 2016 | 10.1108/ECAM-01-2016-0009          | X  |    | X  |
| Zuo J., Rameezdeen R., Hagger M., Zhou Z., Ding Z.  | Dust pollution control on construction sites: Awareness and self-responsibility of managers                           | Journal of cleaner production                         | 2017 | 10.1016/j.jclepro.2017.08.027      |    |    | X  |
| Zuo J., Zhao X., Nguyen Q.B.M., Ma T., Gao S.       | Soft skills of construction project management professionals and project success factors: A structural equation model | Engineering construction and architectural management | 2018 | 10.1108/ECAM-01-2016-0016          |    |    | X  |
| Zuo, F; Zhang, KL                                   | Selection of risk response actions with consideration of secondary risks                                              | International journal of project management           | 2018 | 10.1016/j.ijproman.2017.11.002     |    |    | X  |
| Zuppa D., Olbina S., Issa R.                        | Perceptions of trust in the US construction industry                                                                  | Engineering construction and architectural management | 2016 | 10.1108/ECAM-05-2015-0081          | X  |    | X  |
| Zwikaël, O; Shtub, A; Chih, YY                      | Simulation-Based Training for Project Management Education: Mind the Gap, As One Size Does Not Fit All                | Journal of management in engineering                  | 2015 | 10.1061/(ASCE)ME.1943-5479.0000238 |    |    | X  |
| Ökmen Ö., Öztaş A.                                  | Scenario based evaluation of a cost risk model through sensitivity analysis                                           | Engineering construction and architectural management | 2015 | 10.1108/ECAM-09-2014-0121          |    |    | X  |
